# Supplementary material for: SAMHD1 is a key regulator of the lineage-specific response of acute lymphoblastic leukaemias to nelarabine
Source: Springer Nature journal article supplement (doi:10.1038/s42003-020-1052-8), 2020-06-24
Supplement: MOESM1 [file 42003_2020_1052_MOESM1_ESM.pdf]

# Suppl. Figure 1

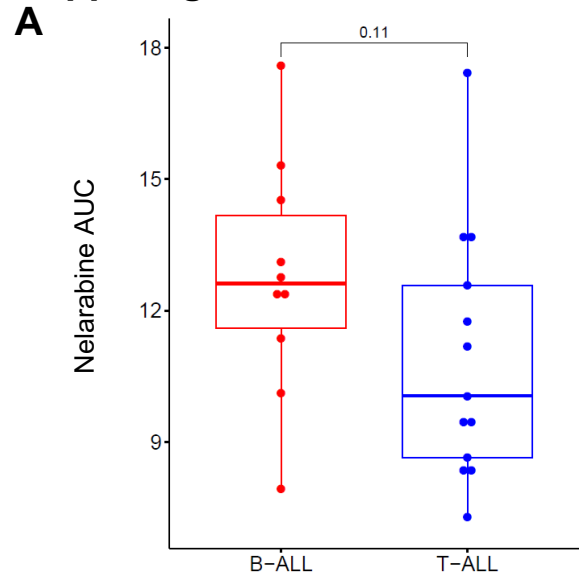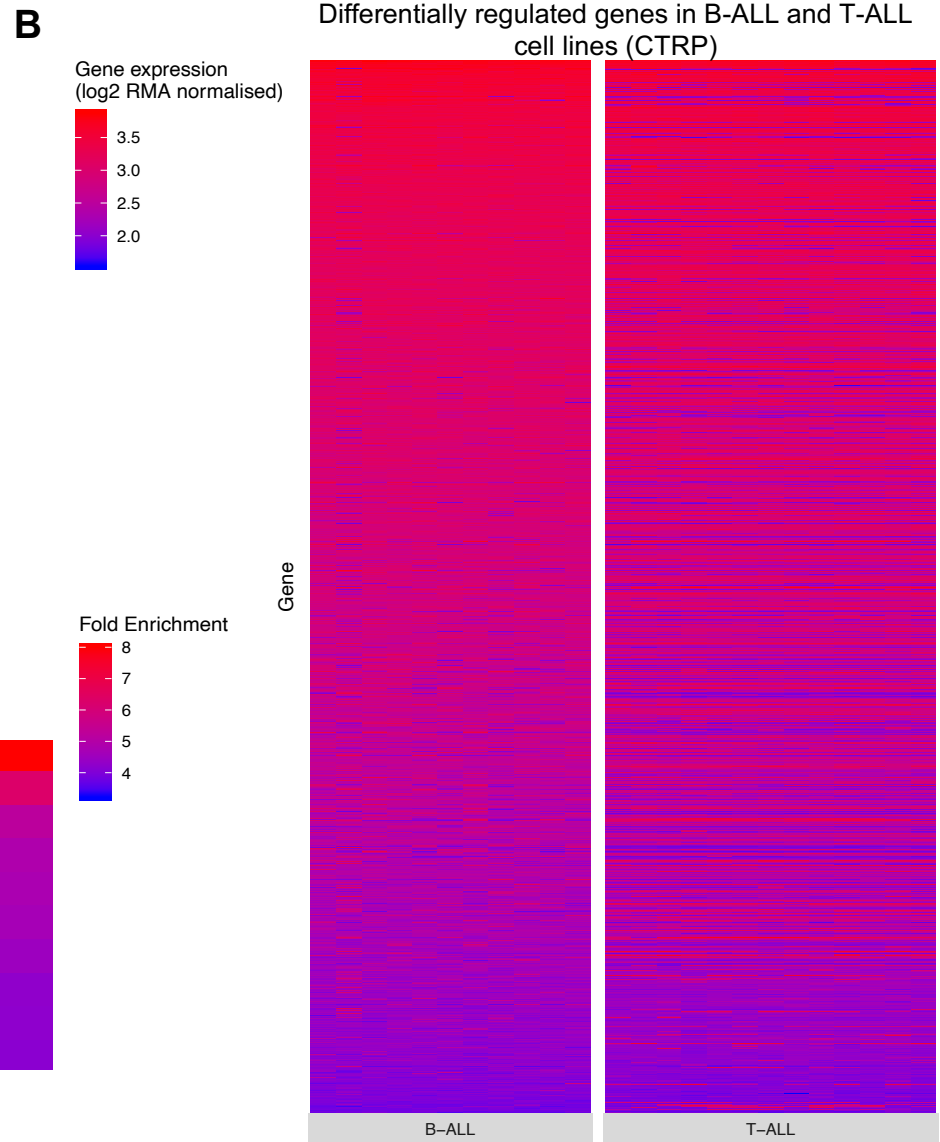

**C**

Top 10 differentially regulated PANTHER pathways between T-ALL and B-ALL cell lines

- regulation of cell-cell adhesion mediated by integrin
- positive regulation of interleukin-2 biosynthetic process
- thymic T cell selection
- positive T cell selection
- positive regulation of interleukin-4 production
- T cell selection
- mast cell activation
- regulation of type 2 immune response
- regulation of interleukin-8 secretion
- regulation of interleukin-4 production

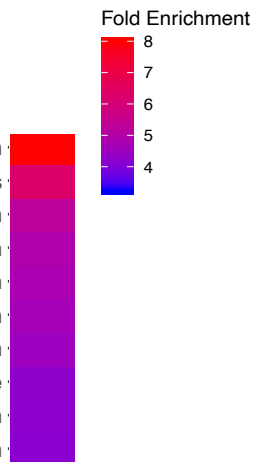

**Suppl. Figure 1.** Gene expression profiles and nelarabine sensitivity in acute lymphoblastic leukaemia (ALL) cell lines. A) Nelarabine sensitivity expressed as area under the curve (AUC) in T-cell precursor ALL (T-ALL) and B-ALL cell lines from CTRP. B) Heatmap illustrating expression patterns of genes differentially regulated between T-ALL and B-ALL cell lines based on CTRP data. Heatmaps displaying the expression of all genes in the CTRP ALL cell lines and those displaying gene expression in the ALL cell lines in the CCLE and GDSC datasets are provided in Suppl. Figure 1D-H. Individual gene expression values are presented in Suppl. Data 1.

## Suppl. Figure 1

**D**

Heatmap illustrating expression (mRNA abundance) of all genes in B- vs. T-ALL cells based on CTRP data.

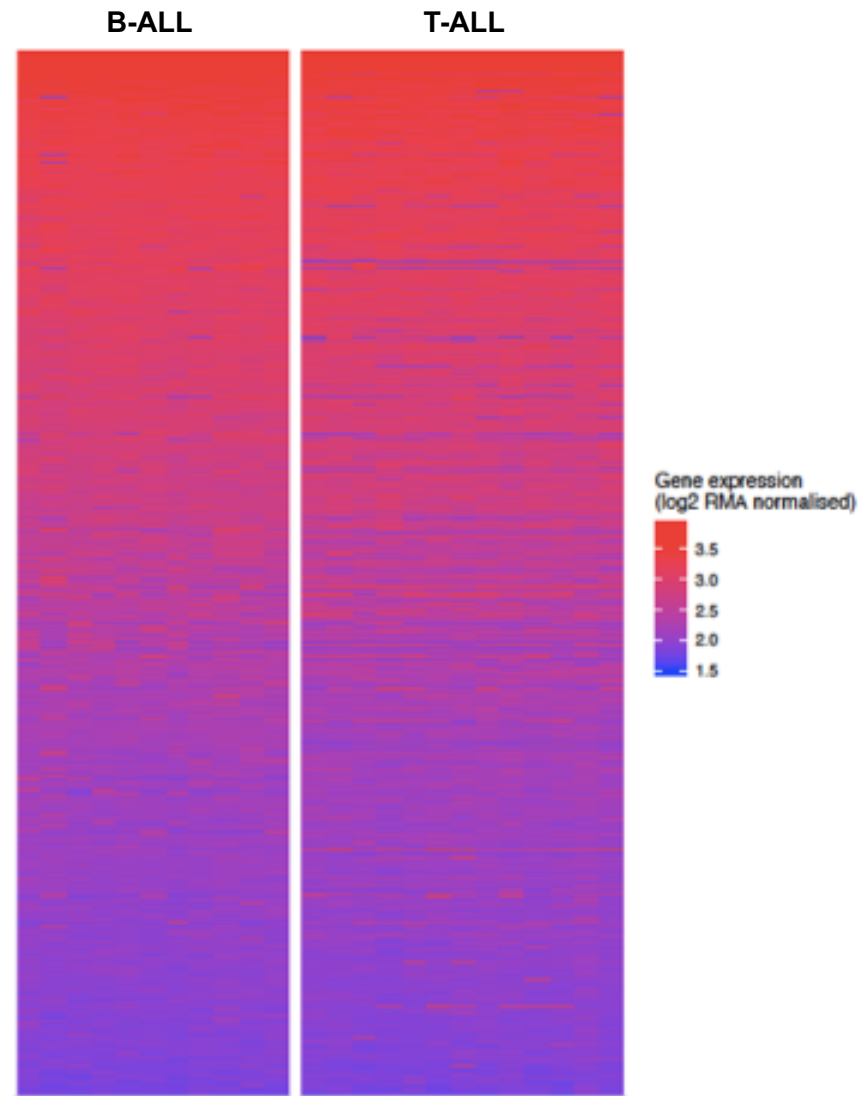

## Suppl. Figure 1

**E**

Heatmap illustrating expression (mRNA abundance) of differentially regulated genes in B- vs. T-ALL cells based on CCLE data.

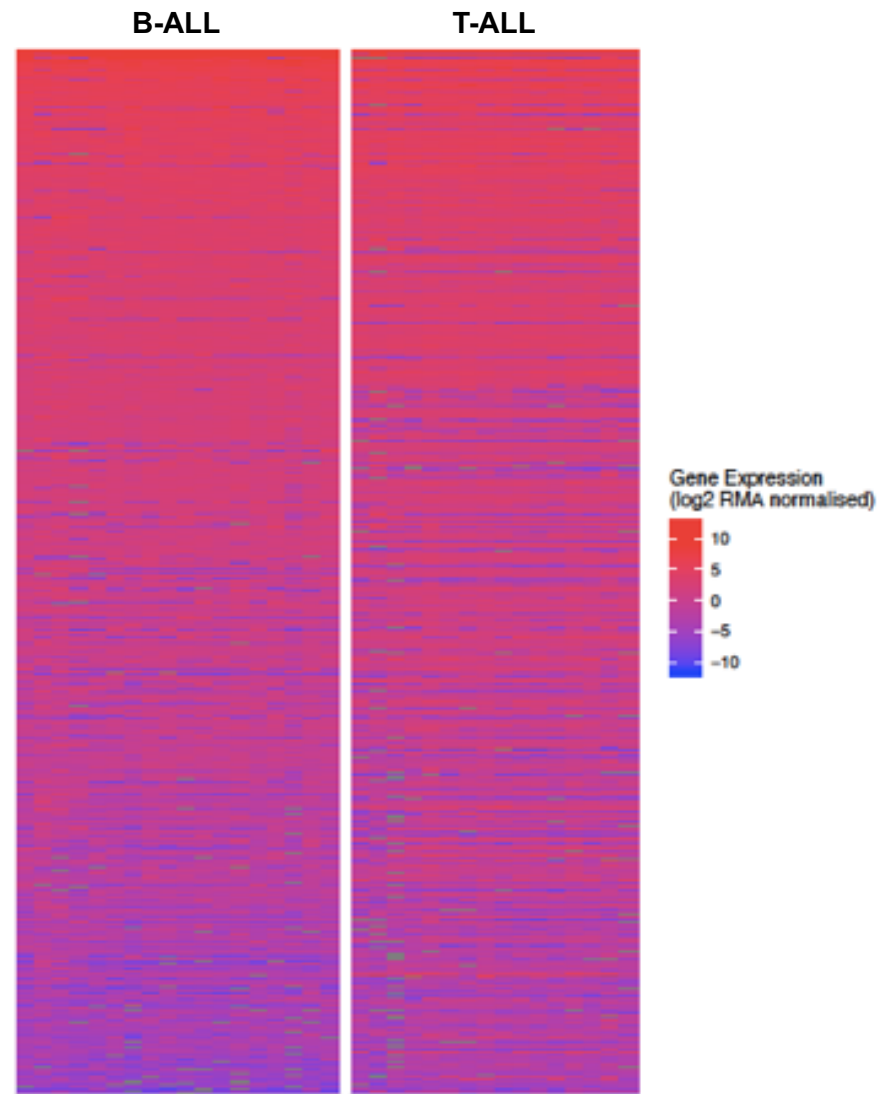

## Suppl. Figure 1

**F**

Heatmap illustrating expression (mRNA abundance) of all genes in B- vs. T-ALL cells based on CCLE data.

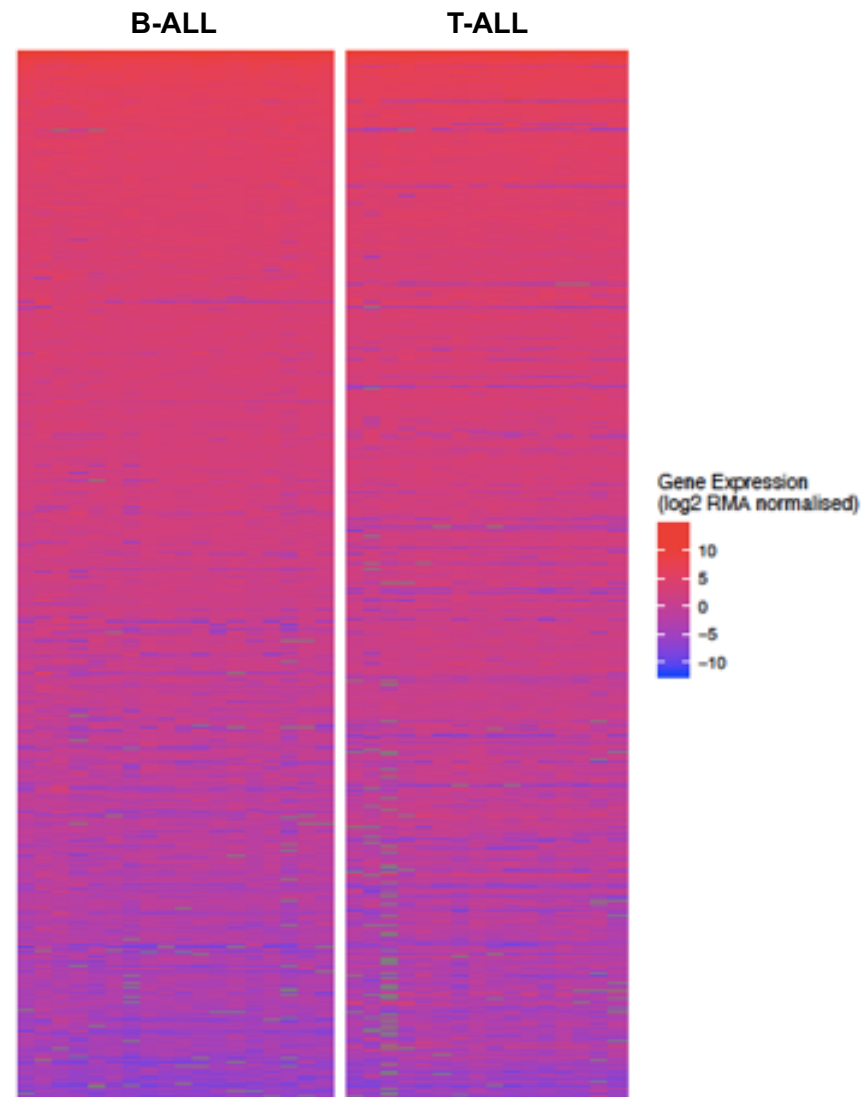

## Suppl. Figure 1

**G**

Heatmap illustrating expression (mRNA abundance) of differentially regulated genes in B- vs. T-ALL cells based on GDSC data.

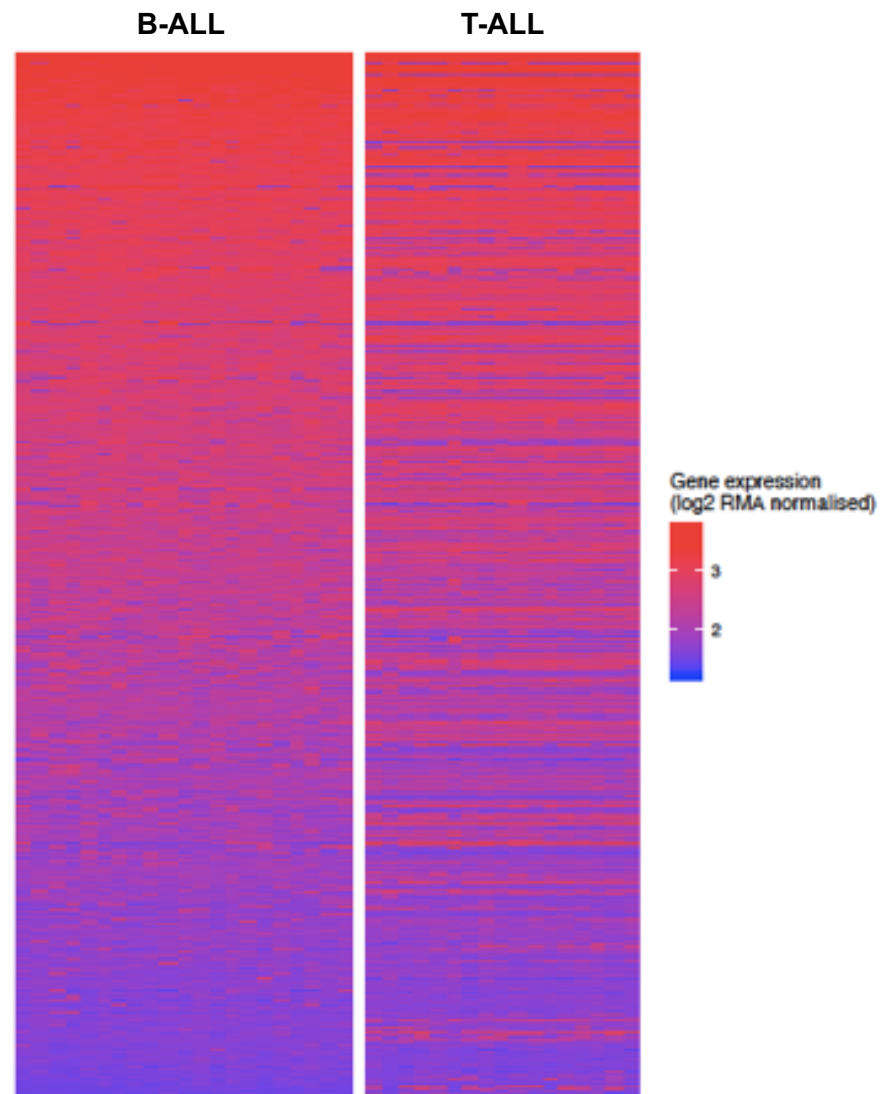

## Suppl. Figure 1

H

Heatmap illustrating expression (mRNA abundance) of all genes in B- vs. T-ALL cells based on GDSC data.

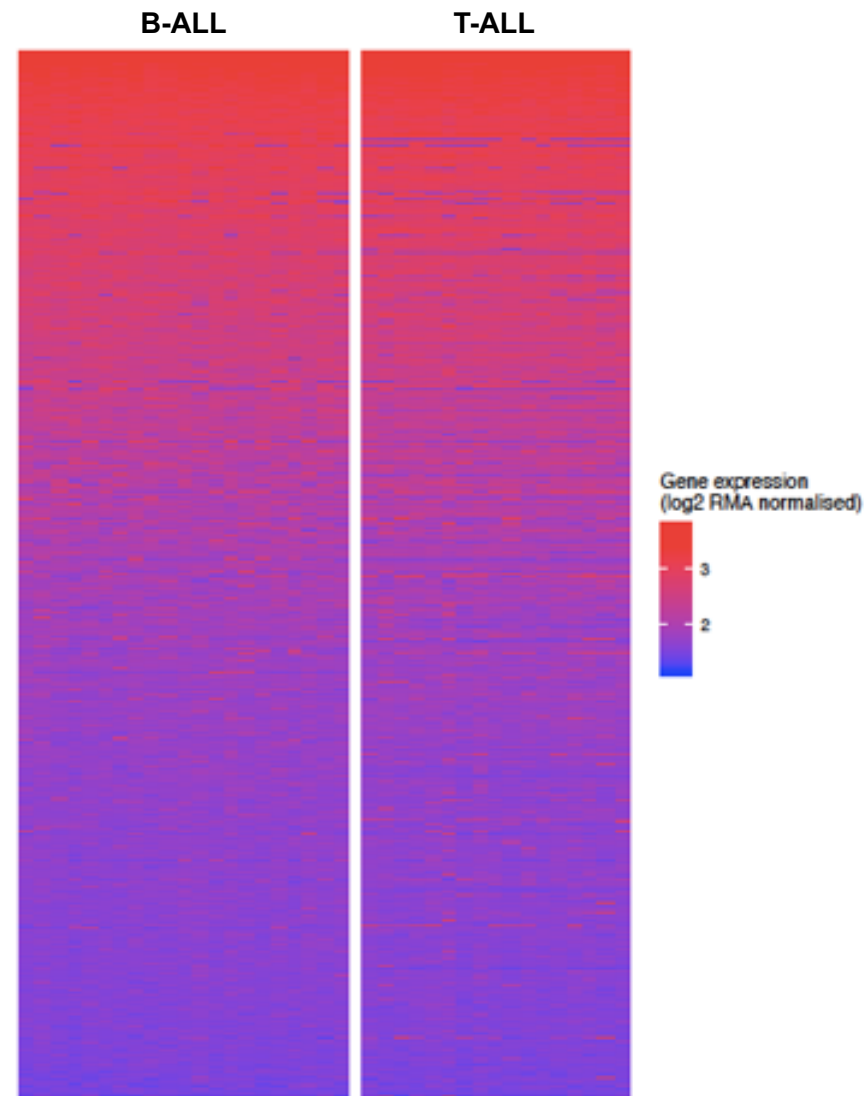

## Suppl. Figure 2

A

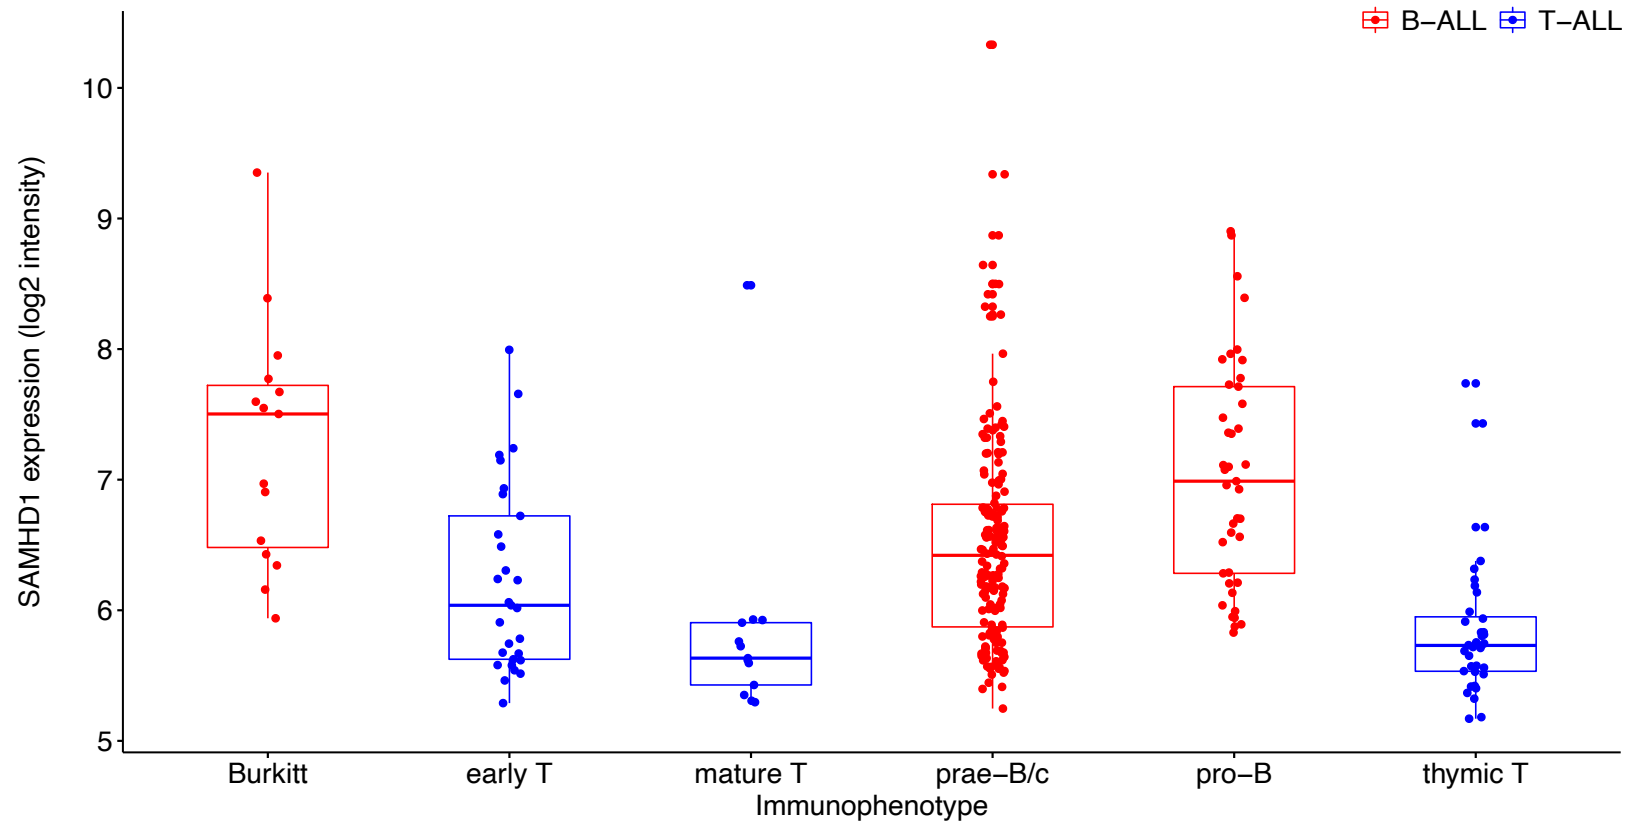

Suppl. Figure 2A. SAMHD1 expression in ALL patients with different immunophenotypes.



|                   | <i>P</i> value |
|-------------------|----------------|
| pre-B/ c-Burkitt  | 0.0067358      |
| early T/ Burkitt  | 0.00073591     |
| pro-B/ Burkitt    | 0.927323943    |
| mature T/ Burkitt | 5.00E-05       |
| thy T-Burkitt     | 2.23E-07       |
| early T/ pre-B/c  | 0.478671852    |
| pro-B/ pre-B/c    | 0.00285102     |
| mature T/ pre-B/c | 0.040886675    |
| thy T/ pre-B/c    | 9.73E-05       |
| pro-B/ early T    | 0.000553081    |
| mature T/ early T | 0.68842299     |
| thy T/ early T    | 0.379143369    |
| mature T/ pro-B   | 5.40E-05       |
| thy T/ pro-B      | 3.67E-09       |
| thy T/ mature T   | 1              |

**Suppl. Figure 2A.** SAMHD1 expression in ALL patients with different immunophenotypes. *P* values for comparisons between individual groups.

# Suppl. Figure 2

## B

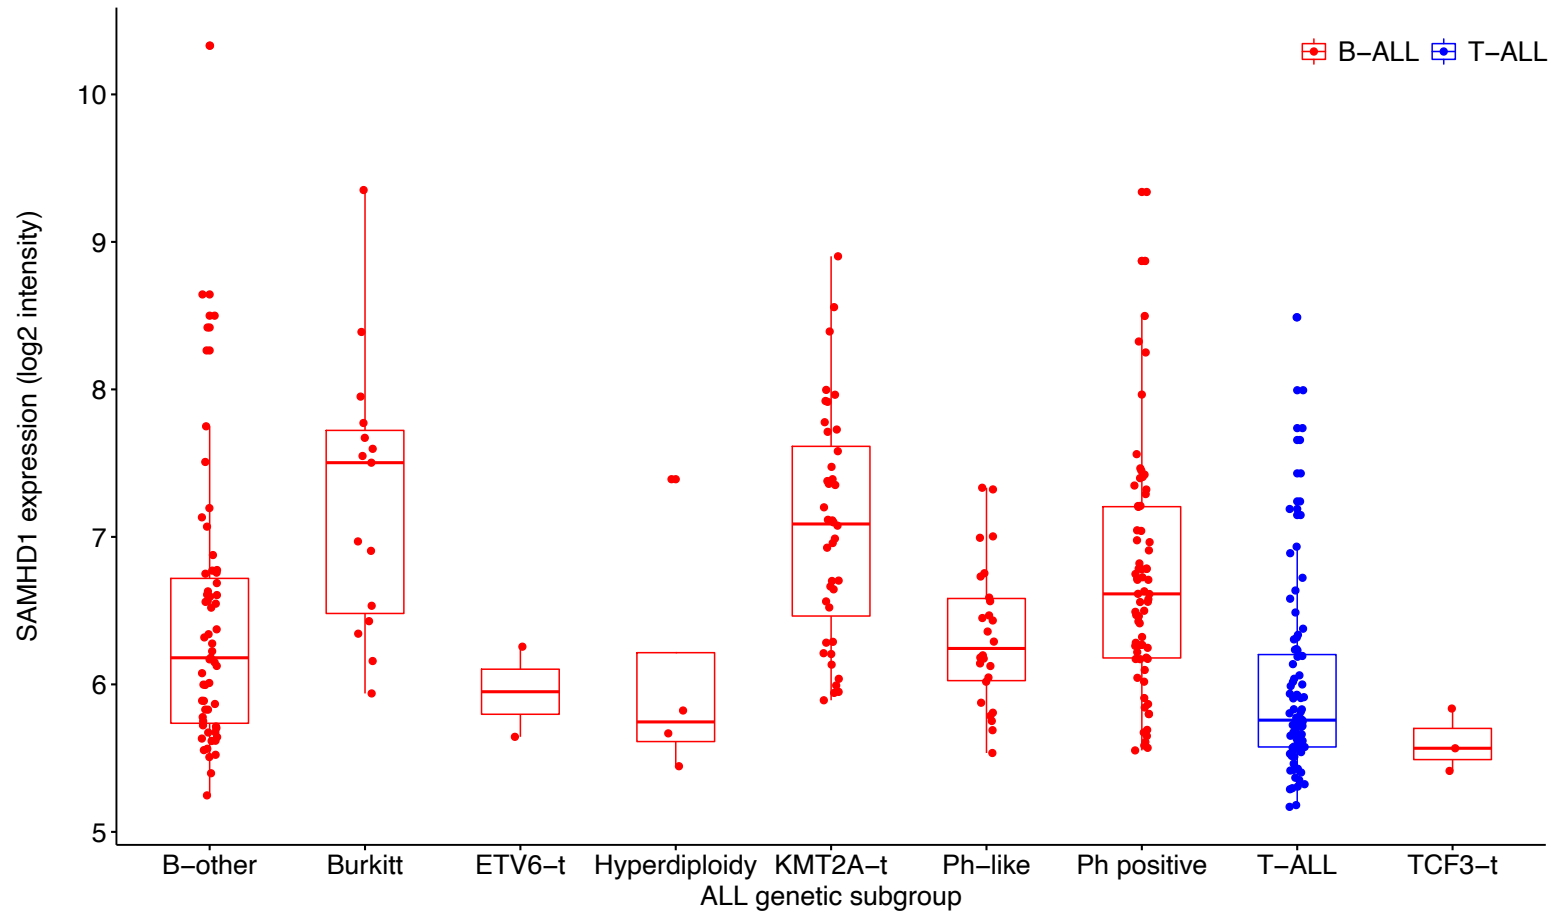

Suppl. Figure 2B. SAMHD1 expression in ALL patients with different genotypes.

|         | <i>P</i> value |
|---------|----------------|
| 2 vs. 1 | 0.38282375     |
| 3 vs. 1 | 0.999905       |
| 4 vs. 1 | 0.00230736     |
| 5 vs. 1 | 0.02880067     |
| 6 vs. 1 | 0.00619649     |
| 7 vs. 1 | 0.70123101     |
| 8 vs. 1 | 0.99542401     |
| 9 vs. 1 | 0.99530362     |
| 3 vs. 2 | 0.38981245     |
| 4 vs. 2 | 0.41595306     |
| 5 vs. 2 | 2.73E-07       |
| 6 vs. 2 | 0.26166224     |
| 7 vs. 2 | 0.2631177      |
| 8 vs. 2 | 0.8994844      |
| 9 vs. 2 | 0.79514518     |
| 4 vs. 3 | 0.00682233     |
| 5 vs. 3 | 0.55549758     |
| 6 vs. 3 | 0.0073478      |
| 7 vs. 3 | 0.84170864     |
| 8 vs. 3 | 0.99912995     |
| 9 vs. 3 | 0.99961577     |

|         | <i>P</i> value |
|---------|----------------|
| 5 vs. 4 | 1.60E-10       |
| 6 vs. 4 | 0.99429435     |
| 7 vs. 4 | 0.04940224     |
| 8 vs. 4 | 0.56219644     |
| 9 vs. 4 | 0.28423458     |
| 6 vs. 5 | 3.79E-07       |
| 7 vs. 5 | 0.99596858     |
| 8 vs. 5 | 1              |
| 9 vs. 5 | 0.99999962     |
| 7 vs. 6 | 0.02309725     |
| 8 vs. 6 | 0.37573601     |
| 9 vs. 6 | 0.14840814     |
| 8 vs. 7 | 0.99992001     |
| 9 vs. 7 | 0.99681029     |
| 9 vs. 8 | 0.99999994     |

**Suppl. Figure 2B.** SAMHD1 expression in ALL patients with different genotypes. *P* values for comparisons between individual groups (1=B-other, 2=Ph pos, 3=Ph-like, 4=KMT2A, 5=T-ALL, 6=Burkitt, 7=TCF3, 8=ETV6, 9=Hyperdip).

### Suppl. Figure 3

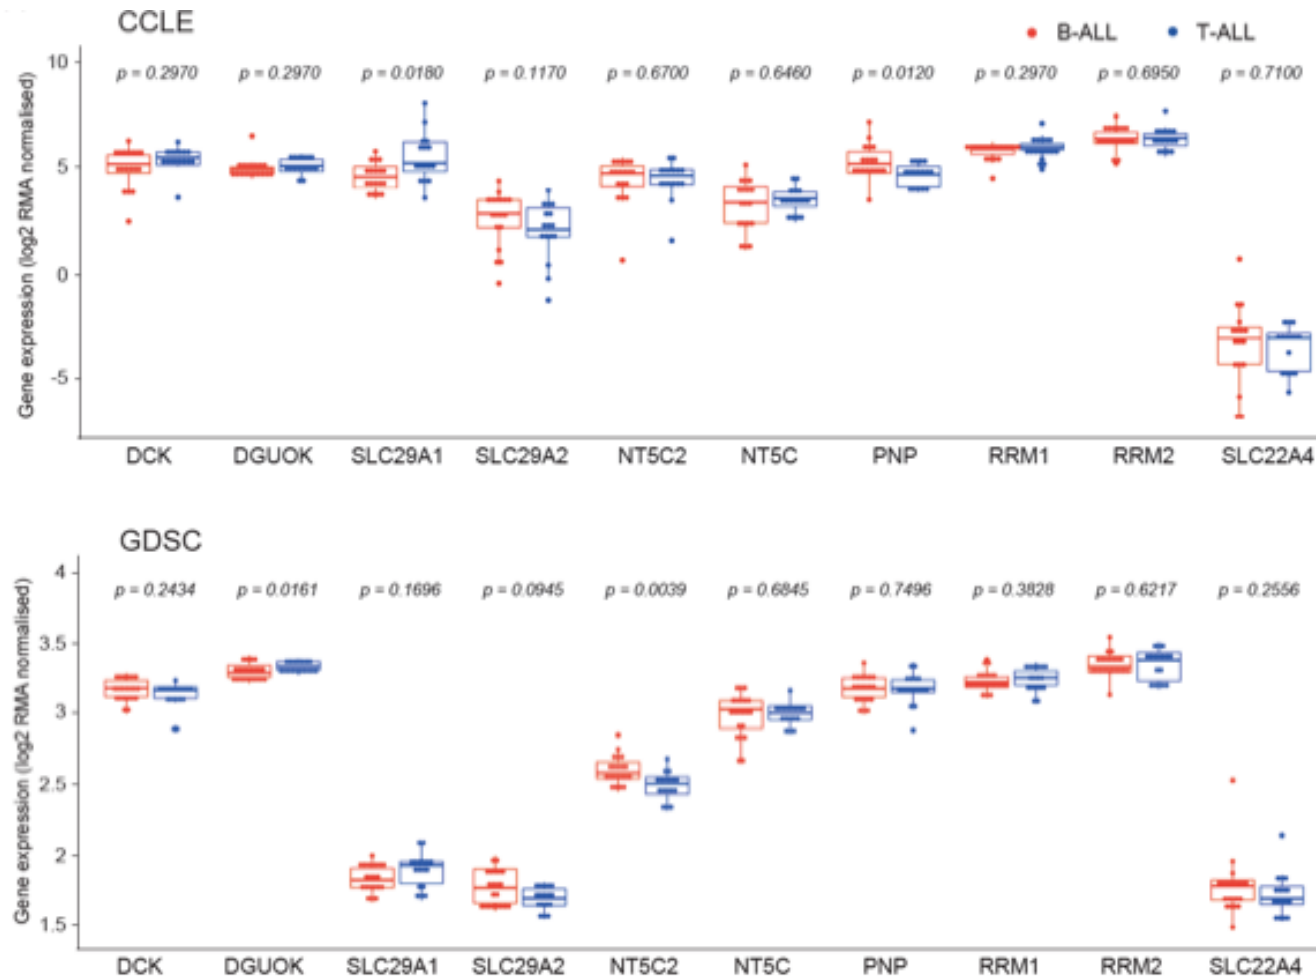

**Suppl. Figure 3.** Expression of genes known to be potentially involved in nucleoside analogue activity in B-ALL and T-ALL cell lines in the CCLE and GDSC.

### Suppl. Figure 3

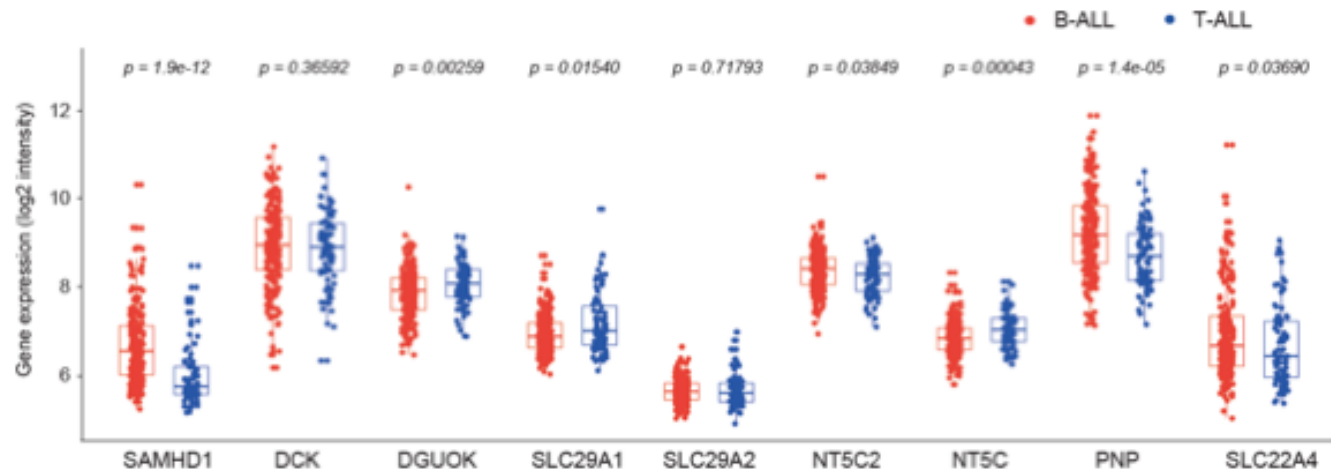

**Suppl. Figure 3.** Expression of genes known to be potentially involved in nucleoside analogue activity in patient-derived B-ALL and T-ALL cells.

# Suppl. Figure 4

All ALL cell lines (CTRP)

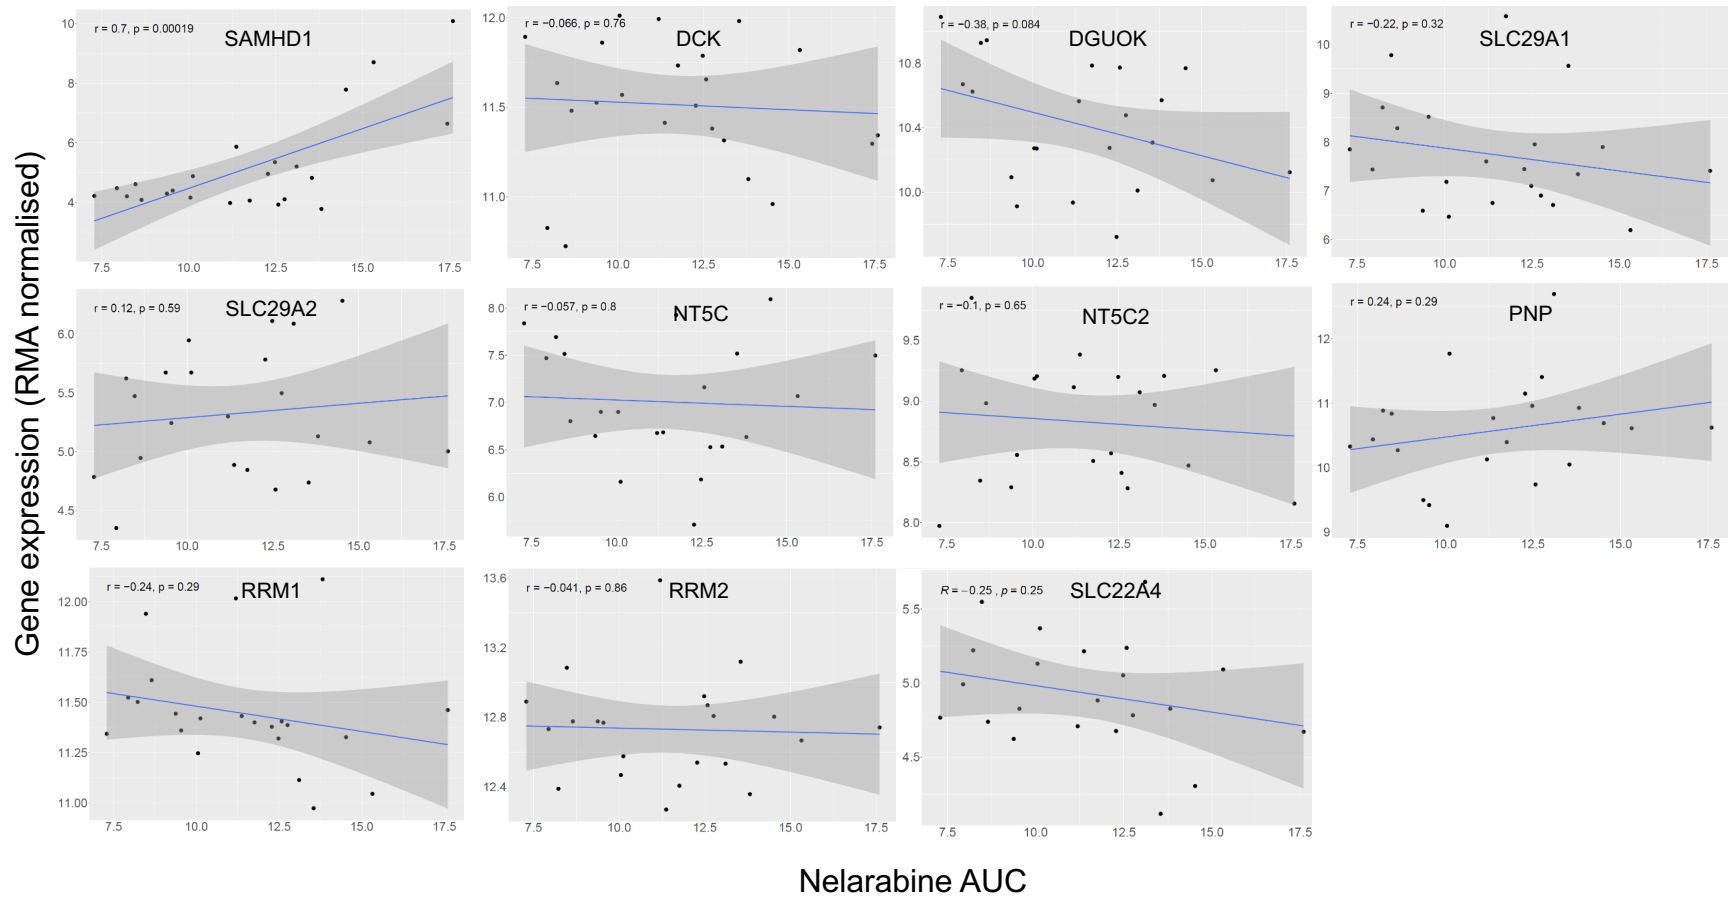

# Suppl. Figure 4

B-ALL cell lines (CTRP)

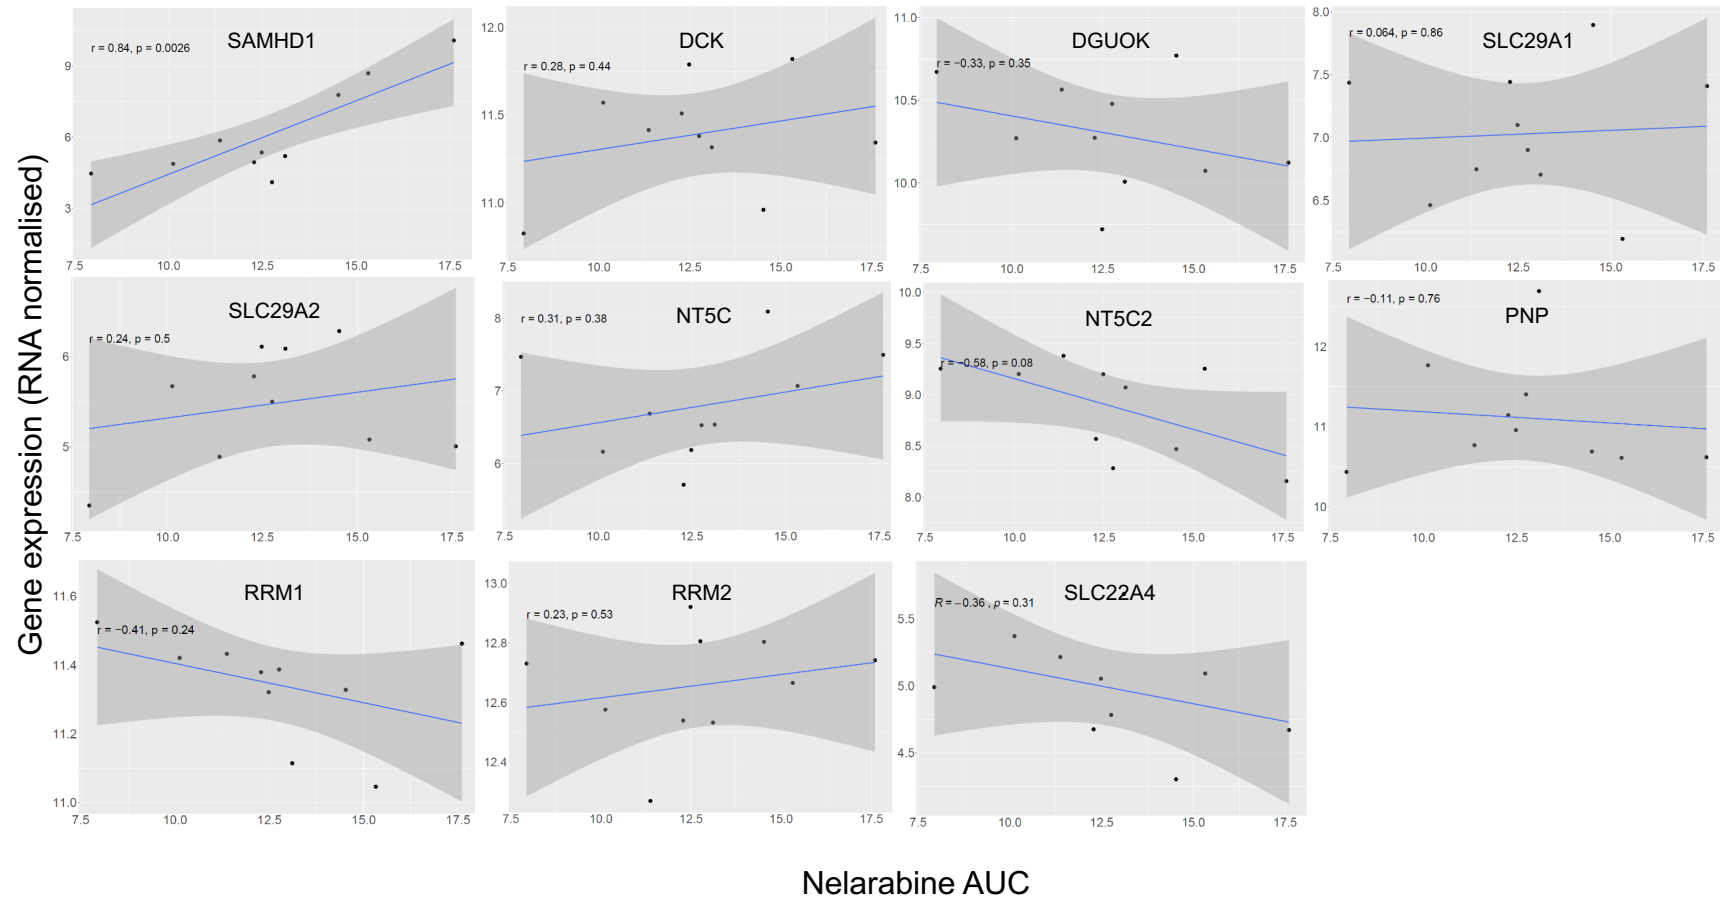

## Suppl. Figure 4

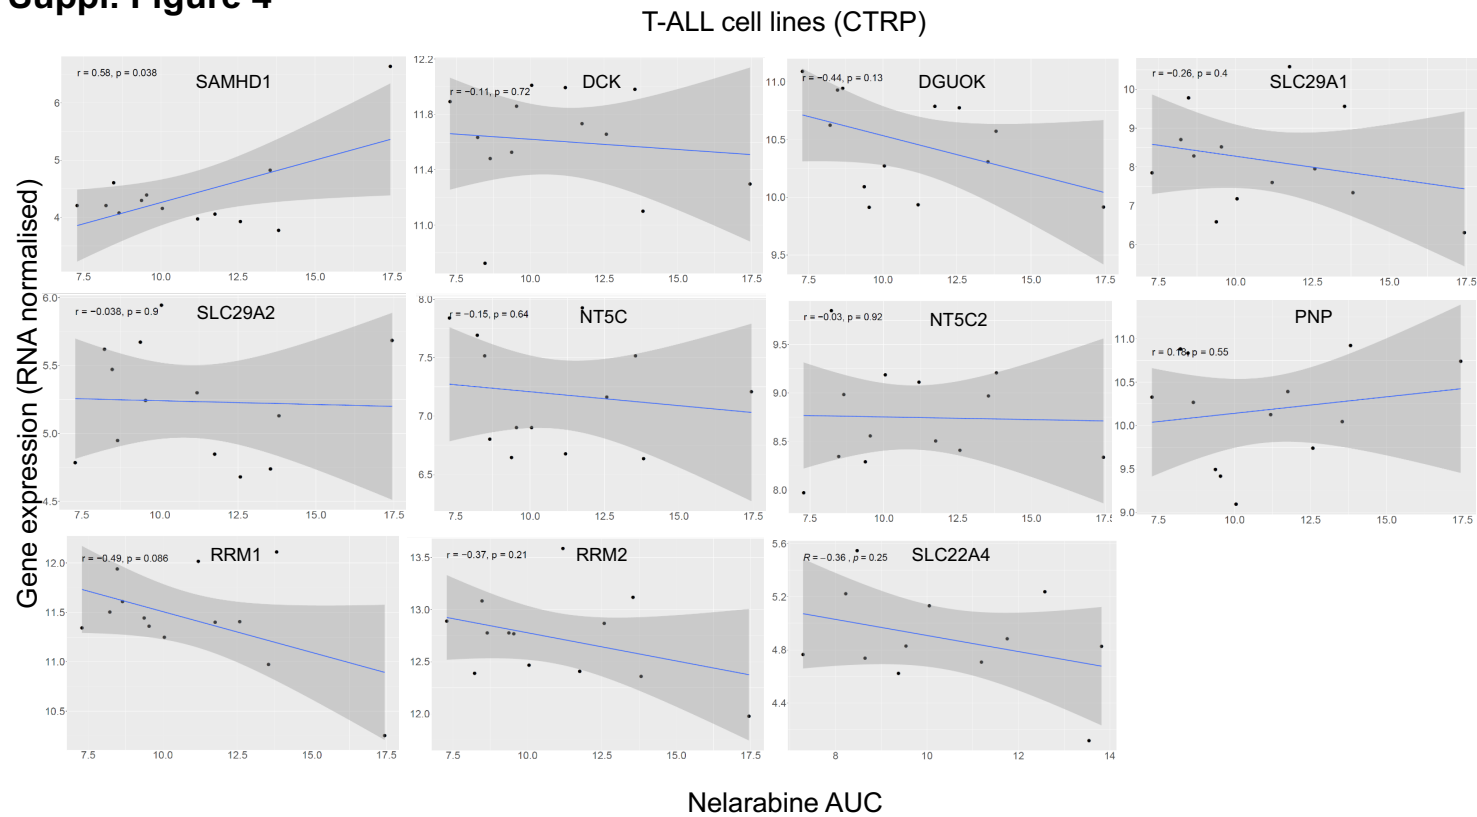

**Suppl. Figure 4.** Correlation of the expression of genes (mRNA abundance) known to affect nucleoside analogue activity to the nelarabine sensitivity (expressed as AUC) across all ALL, the B-ALL and the T-ALL cell lines based on CTRP data. Pearson's r values and respective p-values are provided.



## Suppl. Figure 5

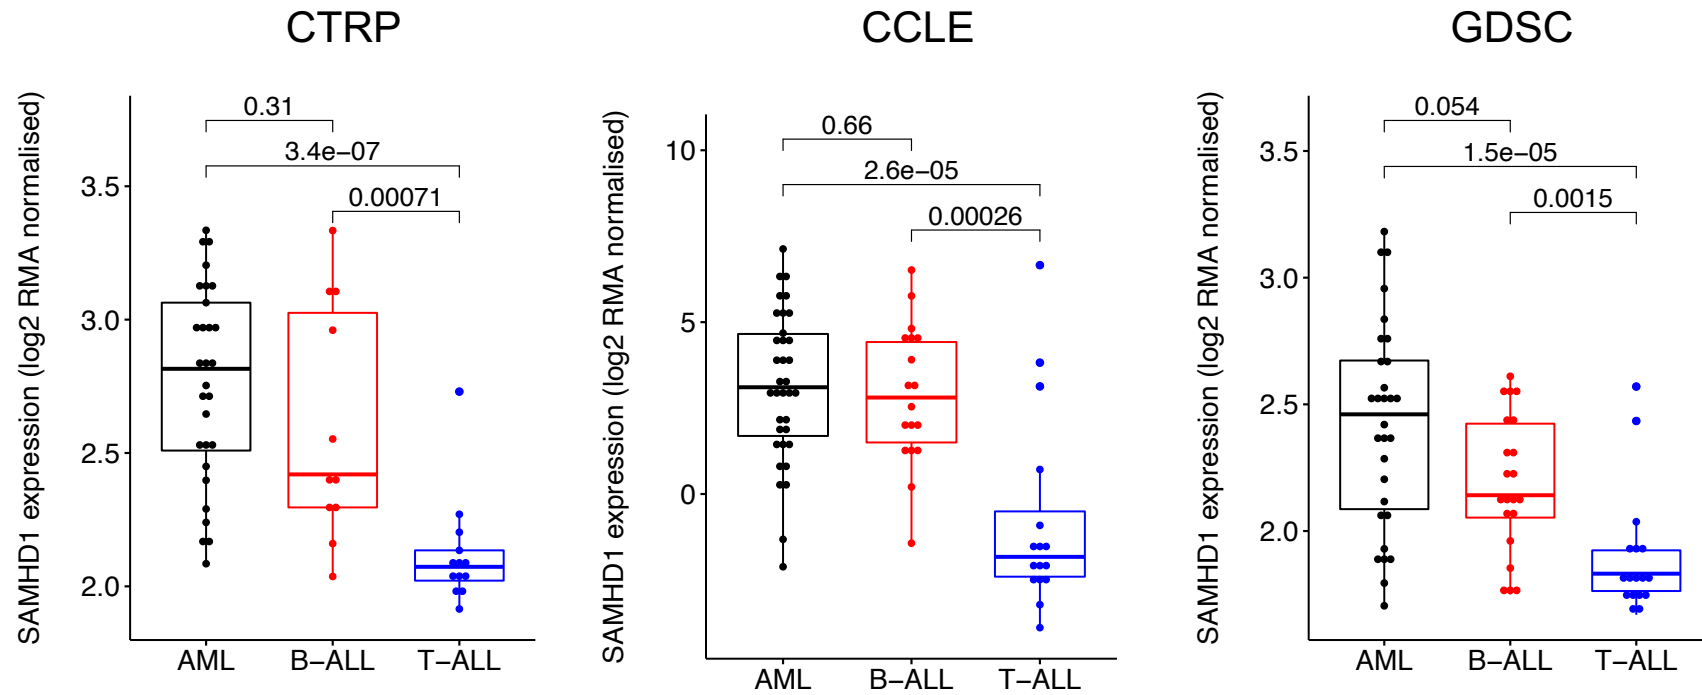

**Suppl. Figure 5.** Comparison of SAMHD1 expression (mRNA abundance) levels in acute myeloid leukaemia (AML), B-cell acute lymphoblastic leukaemia (B-ALL), T-cell acute lymphoblastic leukaemia (T-ALL) cells in CTRP, CCLE, and GDSC. Respective p-values are provided.

## Suppl. Figure 6

CTRP

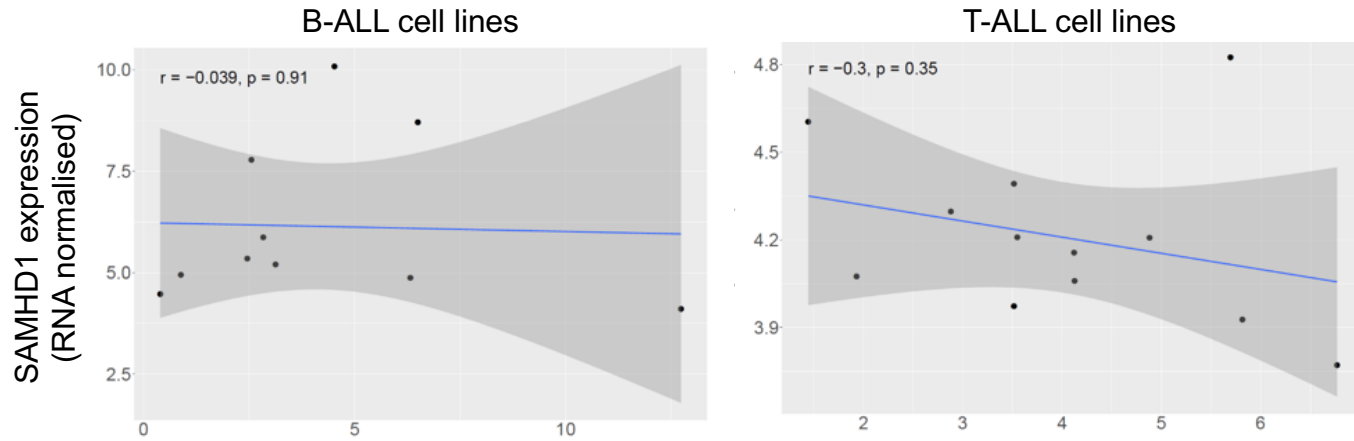

GDSC

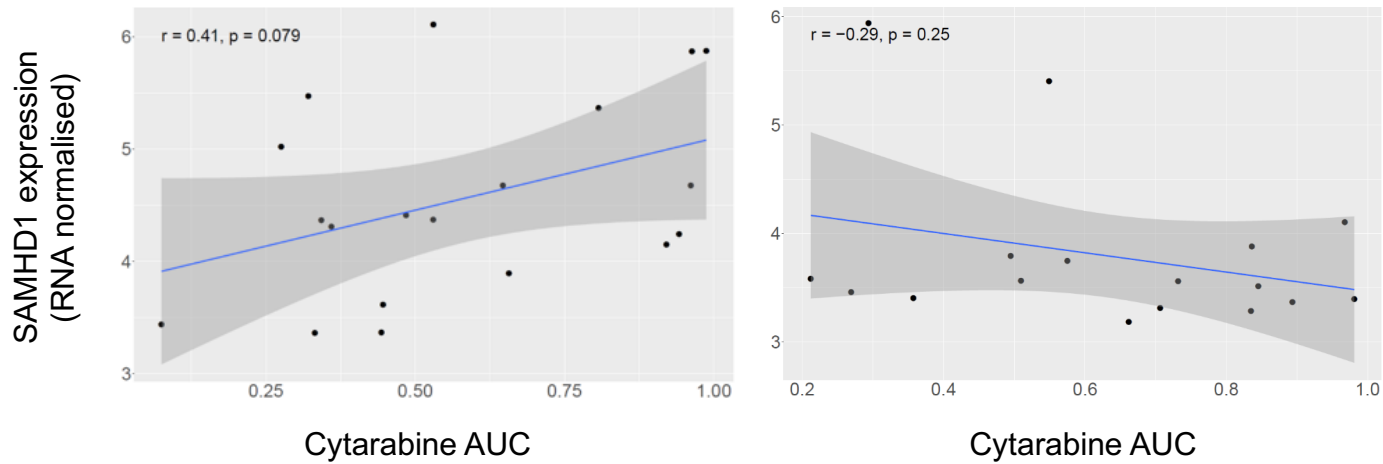

**Suppl. Figure 6.** Correlations of SAMHD1 expression (mRNA abundance) with the cytarabine AUC exclusively in B-ALL- and T-ALL cell lines based on CTRP and GDSC data. Pearson's  $r$  values and respective  $p$ -values are provided.

# Suppl. Figure 7

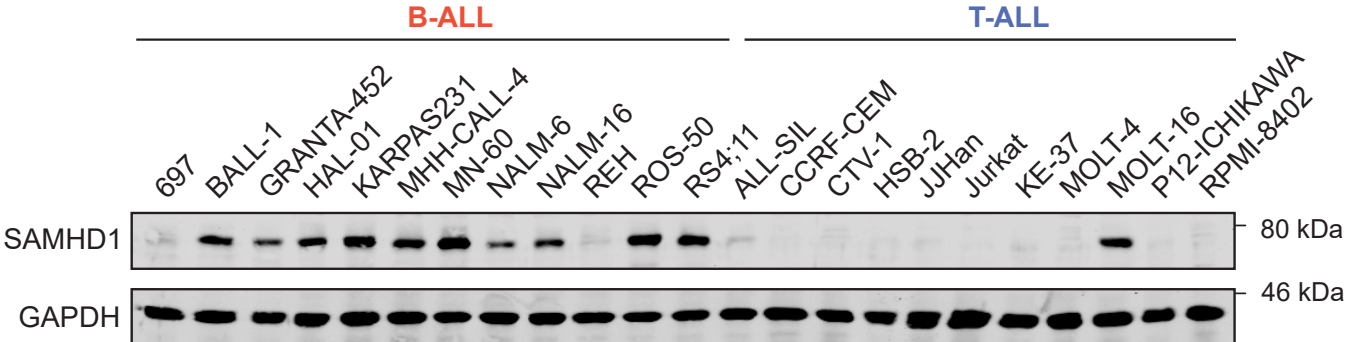

For comparison:  
Figure 3A

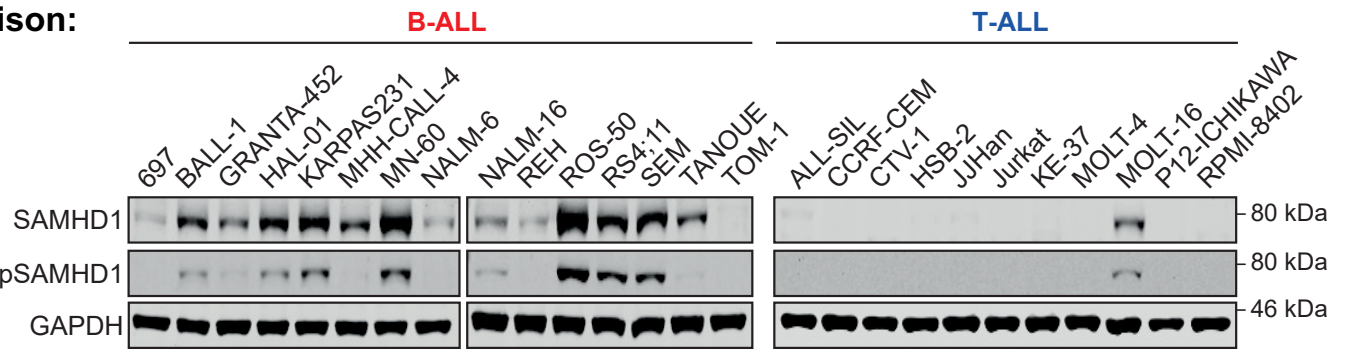

**Suppl. Figure 7.** SAMHD1 protein levels in the RCCL panel of B-ALL and T-ALL cell lines. Representative Western blots indicating protein levels of total SAMHD1 and GAPDH in 23 cell lines of the RCCL panel, which were run on the same gel and blotted on the same membrane to confirm the representativeness of the blots provided in Figure 3A. Figure 3A is provided for comparison.

## Suppl. Figure 8

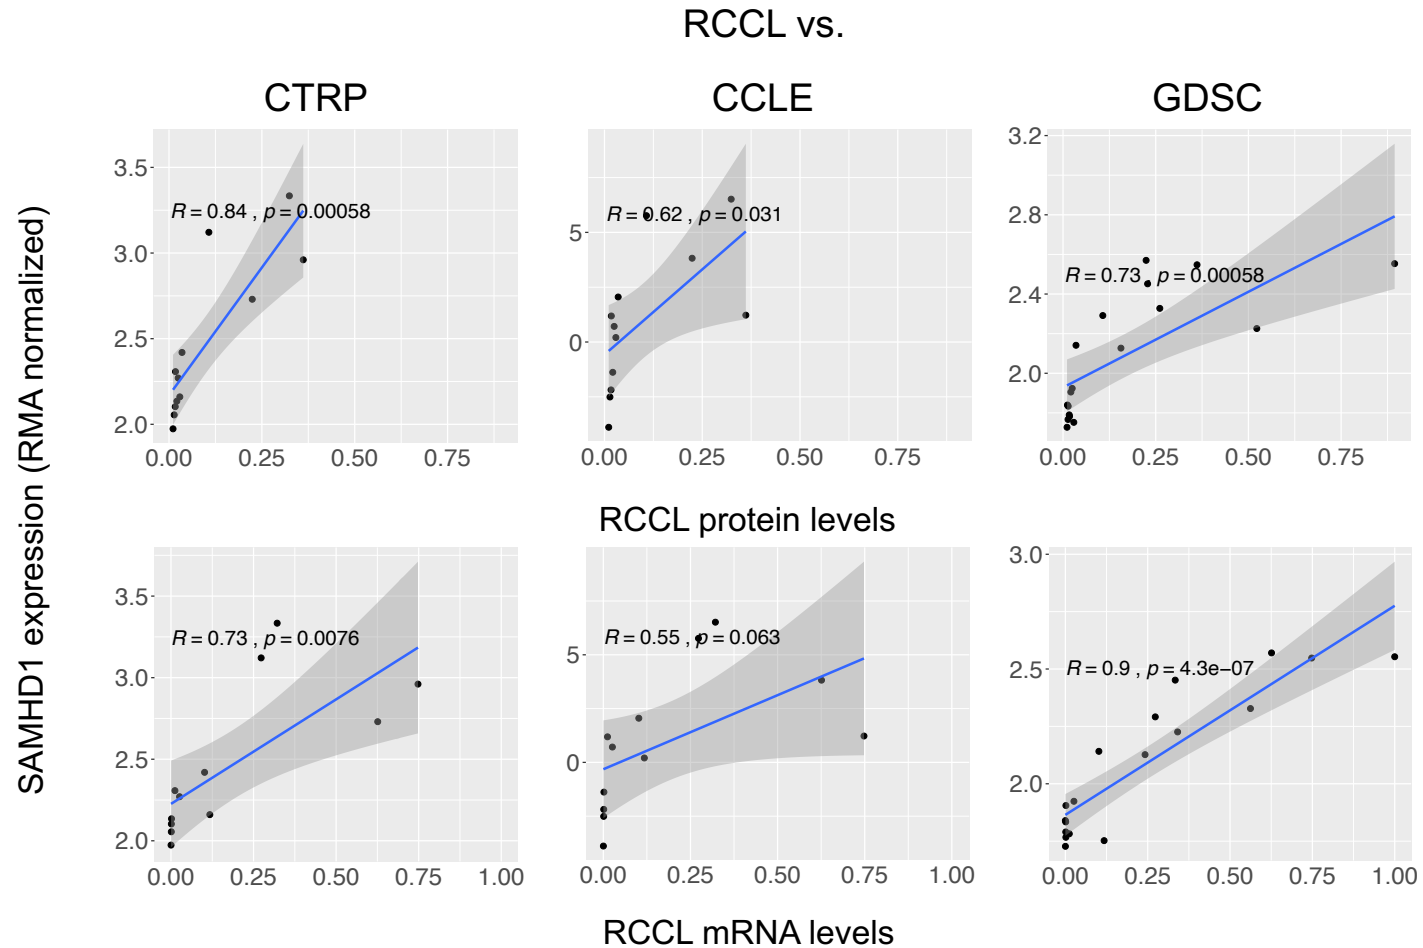

**Suppl. Figure 8.** Correlations of SAMHD1 protein and mRNA levels determined in the RCCL cell lines with the SAMHD1 expression data derived from the CTRP, CCLE, and GDSC among the cell lines that are represented in both respective datasets. Pearson's r values and respective p-values are provided.

## Suppl. Figure 9

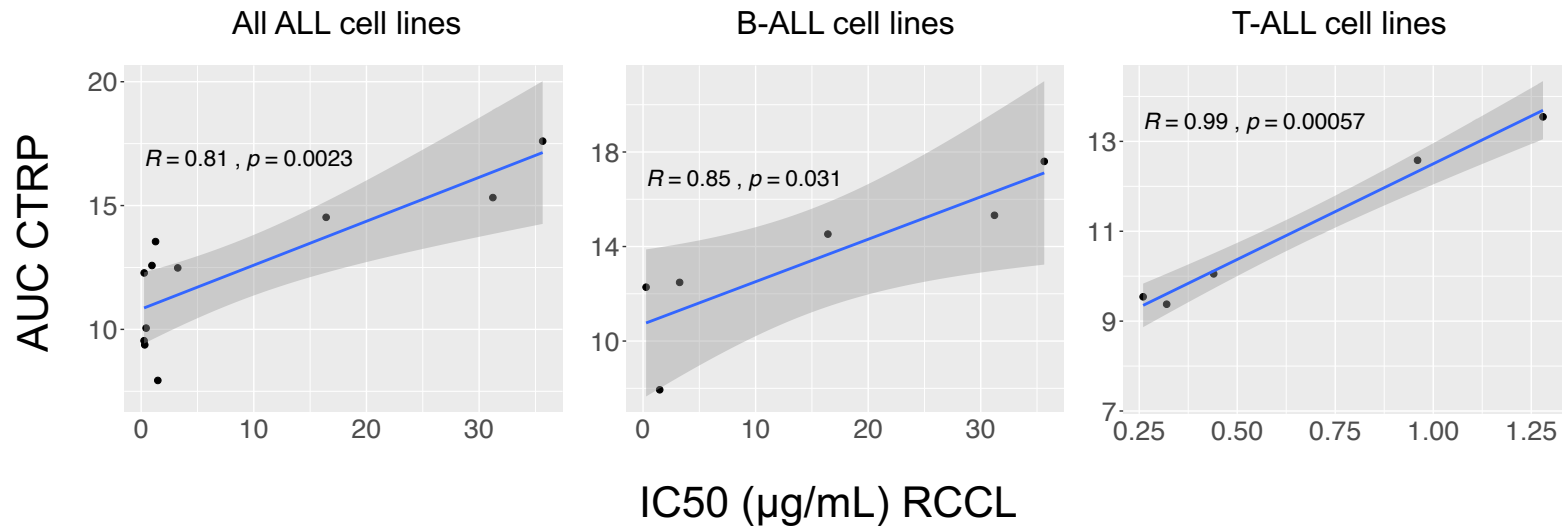

**Suppl. Figure 9.** Correlations of the nelarabine AUCs derived from the CTRP and the AraG IC50 values determined in the RCCL panel across the ALL cell lines present in both datasets. Pearson's r values and respective p-values are provided.

# Suppl. Figure 10

Figure 3

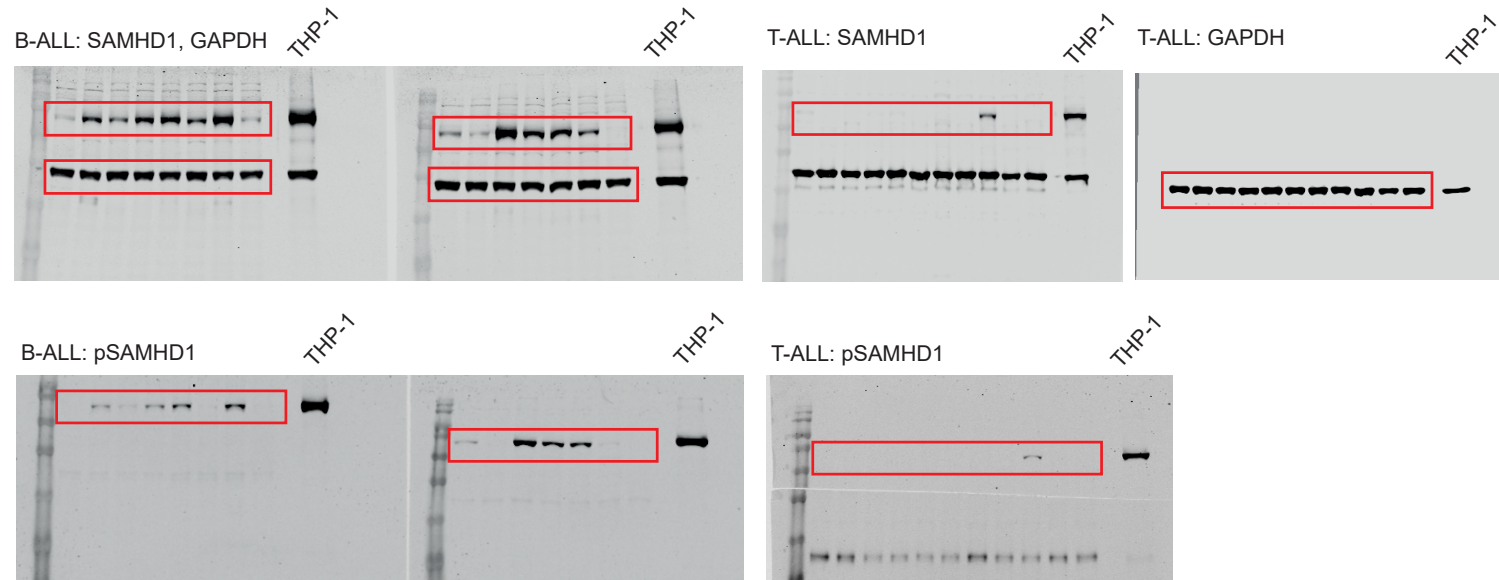

Figure 5A

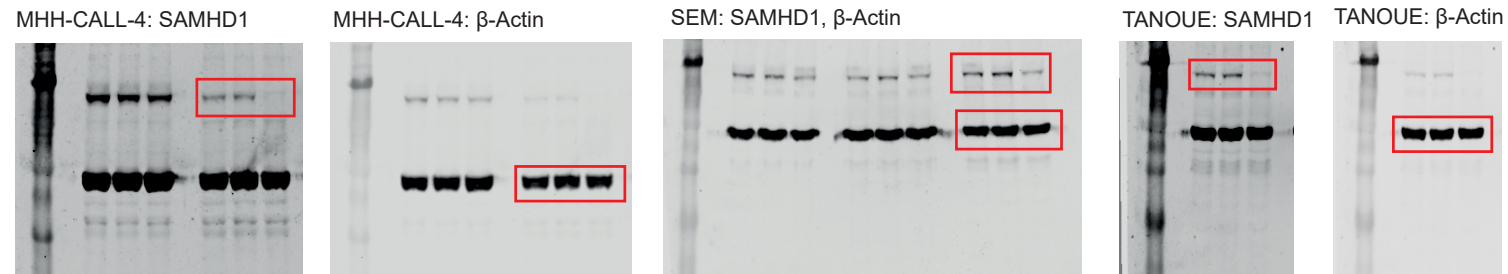

Suppl. Figure 10. Uncropped Western blots and agarose gels.

**Figure 5B**

THP-1: SAMHD1,  $\beta$ -Actin

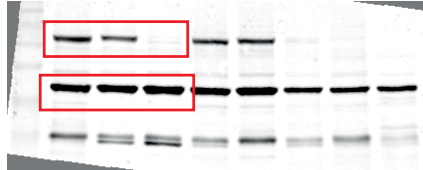

HEL: SAMHD1,  $\beta$ -Actin

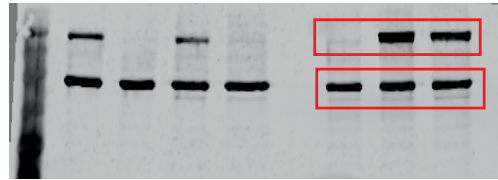

Jurkat: SAMHD1

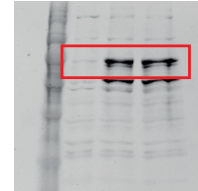

Jurkat:  $\beta$ -Actin

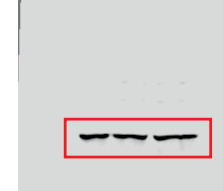

**Suppl. Figure 8**

SAMHD1

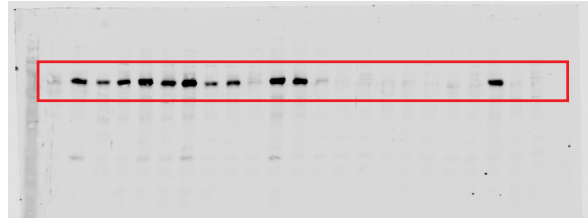

GAPDH

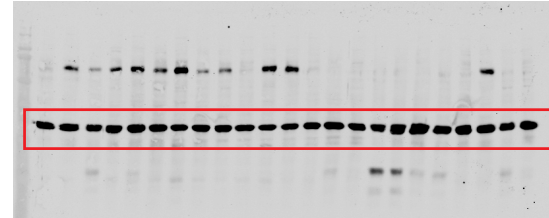

**Suppl. Figure 10.** Uncropped Western blots and agarose gels.

**Figure 6A**

SAMHD1

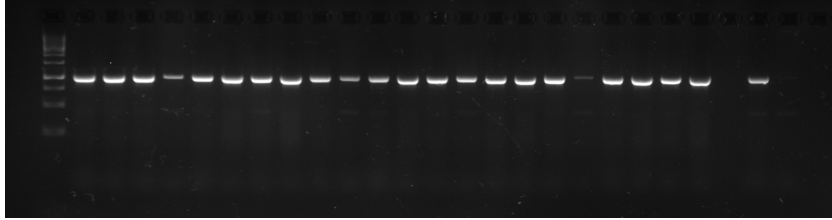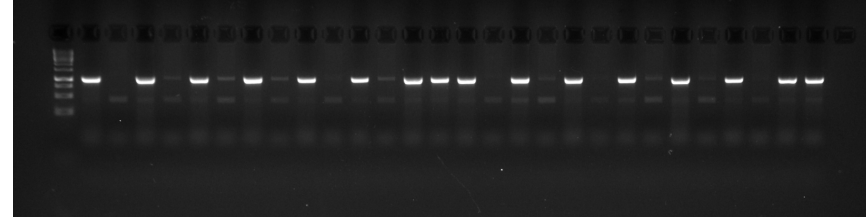

GAPDH

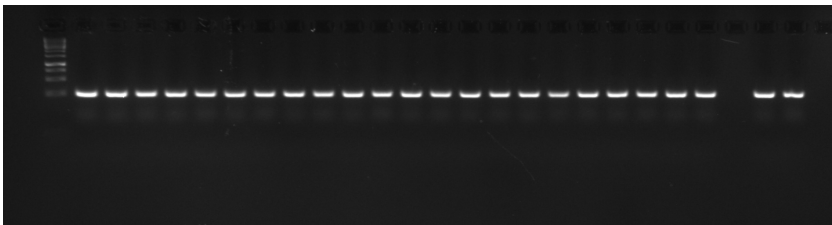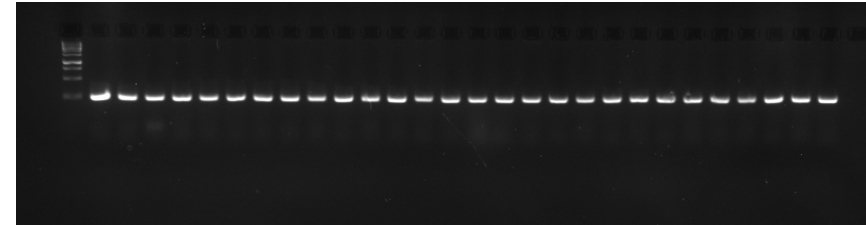

**Suppl. Figure 10.** Uncropped Western blots and agarose gels.



**Suppl. Table 1.** B-ALL and T-ALL cell lines in the CCLE and GDSC (overlaps highlighted in *italics*).

| CCLE                |         | GDSC                |         |
|---------------------|---------|---------------------|---------|
| Cell Line           | Lineage | Cell line           | Lineage |
| 697                 | B-ALL   | 697                 | B-ALL   |
| A4FUK               | B-ALL   | ALL-PO              | B-ALL   |
| EHEB                | B-ALL   | BALL-1              | B-ALL   |
| HUNS1               | B-ALL   | GR-ST               | B-ALL   |
| JM-1                | B-ALL   | HAL-01              | B-ALL   |
| KASUMI-2            | B-ALL   | KARPAS-231          | B-ALL   |
| KOPN-8              | B-ALL   | <i>KOPN-8</i>       | B-ALL   |
| <i>MHH-CALL2</i>    | B-ALL   | LC4-1               | B-ALL   |
| MHH-CALL3           | B-ALL   | <i>MHH-CALL-2</i>   | B-ALL   |
| <i>MHH-CALL4</i>    | B-ALL   | <i>MHH-CALL-4</i>   | B-ALL   |
| MUTZ-5              | B-ALL   | MHH-PREB-1          | B-ALL   |
| NALM-19             | B-ALL   | MN-60               | B-ALL   |
| <i>NALM-6</i>       | B-ALL   | <i>NALM-6</i>       | B-ALL   |
| <i>RCH-ACV</i>      | B-ALL   | P30-OHK             | B-ALL   |
| <i>REH</i>          | B-ALL   | <i>RCH-ACV</i>      | B-ALL   |
| <i>RS-411</i>       | B-ALL   | <i>REH</i>          | B-ALL   |
| SEM                 | B-ALL   | ROS-50              | B-ALL   |
| <i>SUP-B15</i>      | B-ALL   | <i>RS4-11</i>       | B-ALL   |
|                     |         | <i>SUP-B15</i>      | B-ALL   |
|                     |         | SUP-B8              | B-ALL   |
|                     |         | U-698-M             | B-ALL   |
| <i>ALL-SIL</i>      | T-ALL   | <i>ALL-SIL</i>      | T-ALL   |
| C8166               | T-ALL   | ATN-1               | T-ALL   |
| <i>DND-41</i>       | T-ALL   | BE-13               | T-ALL   |
| HPB-ALL             | T-ALL   | CCRF-CEM            | T-ALL   |
| <i>JURKAT</i>       | T-ALL   | <i>DND-41</i>       | T-ALL   |
| <i>KE-37</i>        | T-ALL   | HH                  | T-ALL   |
| <i>LOUCY</i>        | T-ALL   | <i>JURKAT</i>       | T-ALL   |
| <i>MOLT-13</i>      | T-ALL   | KARPAS-45           | T-ALL   |
| <i>MOLT-16</i>      | T-ALL   | <i>KE-37</i>        | T-ALL   |
| MOLT-3              | T-ALL   | <i>LOUCY</i>        | T-ALL   |
| <i>P12-ICHIKAWA</i> | T-ALL   | <i>MOLT-13</i>      | T-ALL   |
| PEER                | T-ALL   | <i>MOLT-16</i>      | T-ALL   |
| <i>PF-382</i>       | T-ALL   | MOLT-4              | T-ALL   |
| <i>RPMI-8402</i>    | T-ALL   | <i>P12-ICHIKAWA</i> | T-ALL   |
| <i>SUP-T11</i>      | T-ALL   | <i>PF-382</i>       | T-ALL   |
| TALL-1              | T-ALL   | <i>RPMI-8402</i>    | T-ALL   |
|                     |         | <i>SUP-T11</i>      | T-ALL   |

**Suppl. Table 2.** B-ALL and T-ALL cell line sensitivity to nelarabine expressed as area under the curve (AUC) derived from CTRP.

| <b>Cell line</b> | <b>Lineage</b> | <b>AUC</b> |
|------------------|----------------|------------|
| HPBALL           | T-ALL          | 11.757     |
| DND-41           | T-ALL          | 7.29       |
| SUPT-1           | T-ALL          | 8.4742     |
| JURKAT           | T-ALL          | 12.58      |
| PEER             | T-ALL          | 13.818     |
| PF-382           | T-ALL          | 11.193     |
| ALL-SIL          | T-ALL          | 13.546     |
| P12-ICHIKAWA     | T-ALL          | 9.5418     |
| RPMI-8402        | T-ALL          | 10.052     |
| MOLT-16          | T-ALL          | 17.44      |
| MOLT-13          | T-ALL          | 8.6473     |
| TALL-1           | T-ALL          | 8.2253     |
| KE-37            | T-ALL          | 9.3765     |
| SEM              | B-ALL          | 17.602     |
| RCH-ACV          | B-ALL          | 12.759     |
| MHH-CALL3        | B-ALL          | 10.123     |
| RS-411           | B-ALL          | 14.526     |
| MHH-CALL4        | B-ALL          | 15.322     |
| REH              | B-ALL          | 7.9391     |
| 697              | B-ALL          | 12.28      |
| SUP-B15          | B-ALL          | 11.372     |
| KASUMI-2         | B-ALL          | 13.107     |
| NALM-6           | B-ALL          | 12.483     |

**Suppl. Table 3.** AraG and cytarabine concentrations that reduce B-ALL and T-ALL cell line sensitivity by 50% (IC50).

| <b>B-ALL</b>     | <b>IC50</b>                                   |                                                   |
|------------------|-----------------------------------------------|---------------------------------------------------|
| <b>Cell line</b> | <b>AraG<br/>(<math>\mu\text{g/mL}</math>)</b> | <b>Cytarabine<br/>(<math>\text{ng/mL}</math>)</b> |
| 697              | 0.27 $\pm$ 0.01                               | 1.23 $\pm$ 0.05                                   |
| BALL-1           | 4.76 $\pm$ 0.50                               | 2.74 $\pm$ 0.05                                   |
| GRANTA-452       | 6.69 $\pm$ 0.70                               | 3.42 $\pm$ 0.25                                   |
| HAL-01           | 2.15 $\pm$ 0.49                               | 0.98 $\pm$ 0.04                                   |
| KARPAS231        | 26.73 $\pm$ 2.62                              | 11.57 $\pm$ 0.77                                  |
| MHH-CALL-4       | 31.22 $\pm$ 2.50                              | 27.07 $\pm$ 3.05                                  |
| MN-60            | 99.10 $\pm$ 1.62                              | 14.95 $\pm$ 0.99                                  |
| NALM-6           | 3.25 $\pm$ 0.28                               | 2.19 $\pm$ 0.06                                   |
| NALM-16          | 65.19 $\pm$ 2.72                              | 8.79 $\pm$ 0.42                                   |
| REH              | 1.48 $\pm$ 0.07                               | 1.31 $\pm$ 0.17                                   |
| ROS-50           | 90.62 $\pm$ 9.05                              | 18.28 $\pm$ 3.57                                  |
| RS4;11           | 16.42 $\pm$ 1.32                              | 5.74 $\pm$ 1.89                                   |
| SEM              | 35.64 $\pm$ 3.71                              | 27.35 $\pm$ 3.18                                  |
| TANOUE           | 49.14 $\pm$ 2.95                              | 27.67 $\pm$ 0.60                                  |
| TOM-1            | 0.10 $\pm$ 0.01                               | 1.38 $\pm$ 0.03                                   |
|                  |                                               |                                                   |
| <b>T-ALL</b>     | <b>IC50</b>                                   |                                                   |
| <b>Cell line</b> | <b>AraG<br/>(<math>\mu\text{g/mL}</math>)</b> | <b>Cytarabine<br/>(<math>\text{ng/mL}</math>)</b> |
| ALL-SIL          | 1.28 $\pm$ 0.16                               | 5.17 $\pm$ 0.64                                   |
| CCRF-CEM         | 0.43 $\pm$ 0.02                               | 3.88 $\pm$ 0.70                                   |
| CTV-1            | 0.38 $\pm$ 0.07                               | 1.72 $\pm$ 0.01                                   |
| HSB-2            | 0.52 $\pm$ 0.05                               | 3.51 $\pm$ 0.07                                   |
| JJHan            | 0.97 $\pm$ 0.19                               | 5.61 $\pm$ 0.53                                   |
| Jurkat           | 0.96 $\pm$ 0.06                               | 6.65 $\pm$ 0.52                                   |
| KE-37            | 0.32 $\pm$ 0.11                               | 1.83 $\pm$ 0.25                                   |
| MOLT-4           | 0.46 $\pm$ 0.01                               | 3.02 $\pm$ 0.10                                   |
| MOLT-16          | 15.55 $\pm$ 1.30                              | 6.48 $\pm$ 0.53                                   |
| P12-ICHIKAWA     | 0.26 $\pm$ 0.01                               | 2.12 $\pm$ 0.19                                   |
| RPMI-8402        | 0.44 $\pm$ 0.01                               | 3.43 $\pm$ 0.21                                   |
