# Supplementary material for: SAMHD1 is a key regulator of the lineage-specific response of acute lymphoblastic leukaemias to nelarabine
Source: Springer Nature journal article supplement (doi:10.1038/s42003-020-1052-8), 2020-06-24
Supplement: MOESM7 [file 42003_2020_1052_MOESM7_ESM.pdf]

## **Descriptions of Additional Supplementary Files**

**Supplementary Data 1.** Gene transcripts differentially regulated (mRNA abundance) between T-ALL and B-ALL cell lines based on data derived from GDSC, CCLE, or CTRP.

**Supplementary Data 2.** Pathway analysis using the PANTHER database to identify differentially regulated processes based on genes differentially regulated between B-ALL and T-ALL cell lines in the CTRP, CCLE, and GDSC.

**Supplementary Data 3.** Genes whose expression is directly or inversely correlated with the nelarabine AUC based on CTRP data.

**Supplementary Data 4.** Genes whose expression is directly or inversely correlated with the nelarabine AUC based on CTRP data.

**Supplementary Data 5.** Data underlying graphs.
