# Supplementary material for: SAMHD1 is a key regulator of the lineage-specific response of acute lymphoblastic leukaemias to nelarabine
Source: Commun Biol. 2020 Jun 24;3:324. doi: 10.1038/s42003-020-1052-8 (PMC7314829; doi:10.1038/s42003-020-1052-8)
Supplement: Supplementary file 2 — Supplementary Data 1 [file 42003_2020_1052_MOESM2_ESM.xlsx]

## Sheet: Legend
Suppl. Data 1. Gene transcripts differentially regulated (mRNA abundance) between T-ALL and B-ALL cell lines based on data derived from GDSC, CCLE, or CTRP
BALL_mean	mean gene expression (mRNA abundance) in B-ALL cell lines
TALL_mean	mean gene expression (mRNA abundance) in T-ALL cell lines
BALL_median	median gene expression (mRNA abundance) in B-ALL cell lines
TALL_median	median gene expression (mRNA abundance) in T-ALL cell lines

## Sheet: GDSC
gene	p	BALL_mean	TALL_mean	BALL_median	TALL_median
FOXO1	6.95e-11	6.47354	3.94323	6.55821	3.78911
GGA2	6.95e-11	7.54815	4.88977	7.25676	4.61157
GNG7	6.95e-11	7.90132	3.61178	7.44114	3.45639
BLNK	6.95e-11	10.3526	3.36716	10.5031	3.11591
LRMP	6.95e-11	10.676	6.9305	10.7337	7.27634
CD19	6.95e-11	6.28302	3.13089	6.32009	3.10145
CD40	6.95e-11	5.6207	3.54345	5.03987	3.54371
MEF2D	6.95e-11	6.21512	4.67069	6.33171	4.65115
MIR5195	6.95e-11	8.37613	3.37631	8.76219	3.29967
BCAS4	1.39e-10	8.17969	5.04498	7.97523	4.60459
GAB1	1.39e-10	6.72257	3.49946	6.40818	3.41418
GATA3	1.39e-10	3.45808	8.06717	3.18475	8.07733
BTK	1.39e-10	8.39381	2.98592	8.64105	2.79981
ZNF608	1.39e-10	7.13878	3.33155	7.53395	3.28415
VPREB3	1.39e-10	8.79536	3.35959	9.08086	3.28644
PIK3AP1	1.39e-10	8.32635	3.72833	8.45282	3.14381
PLXNB2	1.39e-10	6.11331	3.59411	6.0708	3.57497
CD3D	2.78e-10	3.29829	11.4938	3.04196	12.0795
HNRNPLL	2.78e-10	4.04946	6.15575	3.80413	6.19825
CHST15	2.78e-10	6.40592	3.36952	6.37354	3.27573
DOK3	2.78e-10	6.68056	3.71553	6.77997	3.62868
EBF1	2.78e-10	9.41991	3.58472	10.1133	3.18527
TRBC2	2.78e-10	5.63654	11.6483	3.88196	11.903
SNX22	2.78e-10	4.52317	3.18541	4.50114	3.18481
BCL11B	4.86e-10	3.89887	9.76054	2.9973	10.0895
IGHM	4.86e-10	11.0278	4.20888	11.484	3.47433
CD5	4.86e-10	3.21853	5.23641	3.11036	5.51223
PAX5	4.86e-10	3.80463	3.2766	3.77525	3.27144
POU2AF1	8.34e-10	9.84462	5.72346	9.92442	6.36632
WDFY4	8.34e-10	6.68266	3.51304	6.94952	3.44396
TOR4A	8.34e-10	5.12484	3.12726	5.13493	3.14688
SWAP70	8.34e-10	7.4247	4.71568	7.16402	4.39573
CD247	1.32e-09	4.0011	8.26851	3.60732	8.19781
IL2RG	1.32e-09	4.60295	6.64586	4.67465	6.6011
ZNF296	1.32e-09	5.05683	3.38623	5.10387	3.30085
SYVN1	1.32e-09	8.71722	6.74087	8.68079	6.69905
VANGL1	2.09e-09	4.21394	7.32308	4.08294	7.33756
SNX30	2.09e-09	7.349	5.63328	7.35927	5.5651
TCL1A	2.09e-09	10.4822	3.57854	11.5722	3.55348
CD79B	3.13e-09	5.93282	3.99016	5.95805	3.96631
LAPTM5	3.13e-09	10.8703	8.74995	10.9652	9.0465
DERL3	3.13e-09	4.78171	3.48373	4.4513	3.48204
ZEB2	3.13e-09	5.3061	3.2607	5.02382	3.19456
FAM43A	4.66e-09	6.25633	3.31014	6.21011	3.29203
FOXP1	4.66e-09	7.50661	5.99766	7.36074	6.13638
ITK	4.66e-09	3.05761	4.77278	3.01598	4.81443
CXorf21	4.66e-09	7.39289	3.5202	7.61451	3.32252
IFI6	4.66e-09	5.64635	7.81974	5.68324	7.86632
CXorf65	4.66e-09	4.17602	5.98904	4.13886	5.63184
TCF3	4.66e-09	8.68963	7.48616	8.73094	7.61453
SELENOW	4.66e-09	5.06278	7.60663	5.21425	7.78897
PDLIM1	4.66e-09	10.195	5.23091	10.8514	4.28396
PTP4A2	6.74e-09	10.0446	11.1754	10.0797	11.3064
PLCG2	6.74e-09	8.88592	5.36088	9.07749	5.38389
GCSAM	9.66e-09	7.7463	3.61129	8.00747	3.18683
EPHB6	9.66e-09	3.20137	6.63013	3.11972	6.31819
RERE	9.66e-09	4.36362	3.64354	4.30857	3.61562
SLC35E3	9.66e-09	8.99205	6.61556	8.9466	6.63989
CD22	1.36e-08	6.07451	3.11679	6.36127	3.05808
C12orf77	1.36e-08	4.8436	3.20863	4.38743	3.17188
ZCCHC7	1.36e-08	7.24228	4.74019	7.44129	4.61142
ZHX2	1.36e-08	9.07604	6.5549	9.34006	6.72655
STIM2	1.36e-08	7.28897	5.19406	7.36993	5.02546
OXSR1	1.36e-08	6.5395	7.30214	6.54108	7.38529
RAB9B	1.36e-08	3.72932	5.5997	3.29099	5.5582
IRF8	1.89e-08	7.64188	3.88428	7.61964	3.66344
DGKD	1.89e-08	10.0183	7.92818	9.68947	7.74156
SELPLG	1.89e-08	3.54222	4.70131	3.50662	4.62978
S100A13	1.89e-08	7.16453	4.09471	7.1343	4.04763
NECTIN3	1.89e-08	3.75802	6.58691	3.62005	6.84633
FAM104A	2.59e-08	6.31162	6.89637	6.32402	6.86905
SGK223	2.59e-08	8.69165	6.21808	9.08926	6.2415
CASP6	3.53e-08	6.05264	7.44152	6.08264	7.53539
LAMC1	3.53e-08	6.09974	3.34483	6.31241	3.32011
PDP1	3.53e-08	5.26326	6.71058	5.22336	6.38288
CD3E	4.75e-08	3.10456	4.63843	3.08018	4.84521
GXYLT2	4.75e-08	4.00879	6.99276	3.94395	6.92541
CD82	4.75e-08	5.29199	8.33281	4.90926	8.24529
ABCC10	4.75e-08	4.19786	5.18611	4.11863	5.00943
AMMECR1	4.75e-08	8.69919	6.98519	8.71762	6.98589
ABI1	4.75e-08	8.42793	7.71059	8.33819	7.80339
PLCL1	4.75e-08	3.15843	4.13937	3.10942	4.04619
TRAK1	4.75e-08	6.03433	4.88341	6.11099	4.80496
THEMIS	4.75e-08	2.84998	5.75736	2.83912	5.82031
JMJD1C	6.36e-08	8.69059	7.613	8.71384	7.6948
LYN	6.36e-08	8.28803	3.71232	8.40071	3.12088
LRP12	6.36e-08	3.69037	5.81547	3.4119	5.67804
NDFIP1	6.36e-08	5.24467	7.3245	5.32881	7.34092
OGN	6.36e-08	3.03139	5.19025	3.04095	4.94604
SLA	6.36e-08	3.81873	7.65368	3.4516	8.02423
STAT3	6.36e-08	5.96385	7.78183	5.82335	7.94062
INSR	8.42e-08	6.47654	4.39223	6.48064	4.32595
BOLA1	8.42e-08	5.86243	7.73099	6.44489	7.82899
ANXA1	8.42e-08	3.48977	6.86275	3.25853	6.09718
KREMEN2	8.42e-08	3.8389	3.35582	3.73751	3.3569
TSPAN5	8.42e-08	3.45218	6.27317	3.3265	6.52236
TLR1	8.42e-08	4.24627	2.91328	4.29061	2.87475
MDM2	8.42e-08	6.20005	4.04314	6.59887	3.98568
ARRDC2	1.11e-07	7.58191	6.04778	7.43053	6.16949
CSRNP2	1.11e-07	4.53069	5.61718	4.53127	5.2557
DRAP1	1.11e-07	7.01754	8.0405	7.05586	8.08749
CD6	1.11e-07	3.2128	4.30619	3.14596	4.20496
AZI2	1.11e-07	6.40542	7.3698	6.3664	7.41349
TFEB	1.11e-07	4.19362	3.48913	4.07075	3.39131
N4BP3	1.11e-07	3.80186	3.24523	3.67286	3.23705
CD3G	1.45e-07	3.2353	7.16758	3.18034	7.41614
ELOVL4	1.45e-07	3.37902	7.16371	3.41302	7.3997
ARHGAP25	1.45e-07	4.17662	3.49422	4.16644	3.53542
UBASH3A	1.45e-07	3.17935	4.49462	3.18478	4.48669
STAT4	1.45e-07	3.14581	4.69055	3.09012	4.27887
ZSCAN16	1.45e-07	6.65632	4.47016	6.57815	4.09851
MAPK12	1.45e-07	5.43494	3.84531	5.54775	3.6308
EIF2AK3	1.88e-07	7.36292	5.85097	7.47133	5.96682
HMGN4	1.88e-07	9.77754	10.3754	9.82218	10.3574
LRIG1	1.88e-07	6.21032	4.14292	6.33667	4.08869
HEATR6	1.88e-07	4.00693	5.30235	4.11686	5.28959
SLC2A5	1.88e-07	4.31841	3.11061	3.87512	3.07652
MVB12B	1.88e-07	3.31635	3.82611	3.28765	3.77912
NCF4	1.88e-07	8.32837	3.86582	8.60002	3.19217
CD72	2.43e-07	7.25181	3.77501	7.48711	3.36367
CREB3L3	2.43e-07	3.22451	3.96986	3.20451	3.59683
NEK8	2.43e-07	5.07671	3.88634	4.97682	3.82047
ZMYND8	2.43e-07	8.04739	6.71774	7.92118	6.60423
SLC44A2	2.43e-07	6.44907	5.19304	6.39869	5.08706
ARL11	3.11e-07	4.33377	3.39884	4.24165	3.34478
GPCPD1	3.11e-07	7.09006	5.68919	7.22914	5.65589
LY86	3.11e-07	7.2206	3.33763	7.70492	3.25498
GRAP2	3.11e-07	3.76368	6.72752	3.71624	6.71083
UQCC2	3.11e-07	8.3933	9.63132	8.68178	9.62998
THYN1	3.11e-07	8.56926	9.45034	8.62591	9.44007
ZNRF1	3.11e-07	6.68815	8.3677	7.0279	8.54176
TOX	3.11e-07	3.58888	6.2797	3.34105	6.55596
STX7	3.11e-07	8.02044	6.0759	8.03067	6.41688
MEF2A	3.11e-07	8.30429	6.84055	8.37609	6.64029
CHUK	3.97e-07	6.29742	7.00773	6.35645	6.99398
AC021087.4	3.97e-07	6.90176	3.60353	7.10734	3.44157
ARL4C	3.97e-07	5.21103	9.24029	4.67984	9.32638
APBB2	3.97e-07	5.90178	3.9904	6.04385	3.67127
TMBIM6	3.97e-07	8.5683	9.36489	8.52138	9.32202
ADA	5.04e-07	9.58591	11.5412	10.2402	11.9324
KRT1	5.04e-07	3.25834	5.61835	3.24649	5.48882
FAM129C	5.04e-07	6.62116	3.52576	7.0696	3.40242
FAM107B	5.04e-07	9.3678	6.87395	9.29655	7.34283
RIC1	5.04e-07	5.65254	4.43861	5.71946	4.4263
UBE2J1	5.04e-07	9.71919	8.14237	9.85972	8.15404
PRICKLE1	5.04e-07	5.29227	3.73202	5.31943	3.70065
SNX2	5.04e-07	9.59547	8.50932	9.5498	8.57414
PSD3	5.04e-07	6.08871	3.82124	5.68924	3.54885
LIMA1	6.37e-07	5.64525	7.03873	5.73648	6.75247
BACH2	6.37e-07	6.45362	3.71299	6.68334	3.47644
SLA2	6.37e-07	3.24505	4.70017	3.2125	4.73206
SETDB2	6.37e-07	6.13635	4.79997	5.92804	4.89147
MDM4	6.37e-07	6.6369	5.67282	6.6629	5.64825
TFRC	6.37e-07	9.87727	11.1384	10.1317	11.1326
GIMAP7	8.01e-07	3.45506	7.38231	3.23759	7.24824
AUTS2	8.01e-07	5.143	3.80228	4.98969	3.6591
KLHL3	8.01e-07	3.53502	4.1716	3.43799	4.11919
CPNE2	8.01e-07	7.48896	4.4513	7.5805	4.17487
ATP6AP1L	8.01e-07	4.68253	6.05665	4.4648	6.23934
AARD	8.01e-07	3.14703	4.7455	3.12514	3.87888
STRBP	8.01e-07	9.56772	8.39845	9.66315	8.49329
TLR10	8.01e-07	4.08981	2.82574	3.59518	2.83758
SCP2	8.01e-07	7.07539	7.63278	7.144	7.69696
PXYLP1	8.01e-07	4.55965	6.3792	4.39433	6.56794
CD2	1e-06	3.17962	6.35661	3.15524	5.04505
HDAC5	1e-06	5.91431	4.87083	6.06691	4.88704
LITAF	1e-06	8.54509	5.57356	8.81692	5.87053
LRRN1	1e-06	2.84737	4.3637	2.80221	4.14067
EAF2	1e-06	8.32672	6.40639	8.20973	6.45193
AGK	1e-06	4.85048	5.77587	5.02761	5.75104
EOMES	1e-06	3.09199	3.91304	3.11362	3.61234
ZAP70	1e-06	4.77477	6.66329	4.46116	6.86499
RAB33A	1e-06	4.03843	7.45396	3.58047	7.50547
TRAT1	1e-06	2.82056	7.45463	2.83279	8.28682
PIP5K1B	1e-06	5.20508	3.18922	4.99394	3.06994
STIM1	1e-06	5.43874	6.41696	5.52908	6.51596
PHLPP1	1e-06	5.11761	3.99768	5.19017	3.83547
SAYSD1	1e-06	5.9418	7.35741	5.87776	7.41249
NBR1	1e-06	5.68717	6.71253	5.48818	6.62676
RAB8B	1e-06	5.39527	6.29787	5.39869	6.2518
COCH	1.25e-06	8.12978	4.40075	8.39885	3.48386
COX11	1.25e-06	6.98507	7.69313	6.9726	7.57837
KCTD1	1.25e-06	4.0298	6.27241	3.74841	6.47449
CDYL	1.25e-06	7.66313	6.62627	7.59855	6.84796
TSPAN14	1.25e-06	6.84463	5.51415	6.8712	5.526
TRPC4AP	1.25e-06	5.32413	6.15737	5.37107	6.04975
SHOC2	1.25e-06	7.9126	7.01251	8.05273	6.92435
SLC4A8	1.25e-06	3.16407	3.83591	3.1306	3.80294
PAOX	1.25e-06	3.4742	3.15822	3.47445	3.1268
'MARCH3	1.25e-06	5.39489	3.70641	5.52383	3.4748
POMGNT2	1.25e-06	3.6153	5.03632	3.56396	5.29623
TMEM164	1.25e-06	3.34044	3.71756	3.31367	3.71886
TSPAN7	1.25e-06	3.63376	7.6543	3.02402	8.57372
CHRNA3	1.55e-06	2.99493	4.0355	2.99457	3.71636
CORO2A	1.55e-06	3.94735	5.65731	3.74206	5.64804
TACC1	1.55e-06	5.41153	6.59396	5.39794	6.58682
RHOG	1.55e-06	6.63894	7.89319	6.43375	7.8936
UNKL	1.55e-06	5.41741	4.64459	5.40565	4.53465
SUSD4	1.55e-06	3.21135	3.78406	3.20862	3.52557
TNIK	1.55e-06	3.05884	4.94838	3.00531	4.48222
MAL	1.55e-06	3.15121	7.33024	3.11736	7.86792
CROCC	1.92e-06	3.38226	3.82323	3.37102	3.76729
CTSS	1.92e-06	6.89293	4.23121	6.94596	3.67899
GRK3	1.92e-06	4.90206	6.68259	4.38746	6.90587
GNPDA1	1.92e-06	4.53865	6.31689	4.24897	6.19819
KANK2	1.92e-06	6.18927	4.36209	6.2741	4.18189
EPSTI1	1.92e-06	3.28765	6.69408	3.04832	6.72284
CD7	1.92e-06	3.43181	4.59413	3.39602	4.18339
HLA_DRA	1.92e-06	10.9338	4.01608	11.5652	2.9804
GLB1	1.92e-06	7.28247	8.26121	7.39298	8.13945
OFD1	1.92e-06	6.03598	4.84356	5.69986	4.87234
UBE2A	1.92e-06	9.20187	9.73117	9.27936	9.64479
PDE4B	1.92e-06	3.86961	2.97929	3.43033	2.9271
RIPK2	1.92e-06	7.11464	4.65163	7.15784	3.99977
PHACTR1	1.92e-06	4.93778	3.49159	4.62829	3.26247
FGD4	2.36e-06	3.65618	3.37528	3.56014	3.36924
KDM1B	2.36e-06	4.80598	4.03651	4.69958	3.9658
IFI44	2.36e-06	3.77611	4.98537	3.67331	4.71551
CSF2RB	2.36e-06	5.31307	3.6142	5.50579	3.14853
CDH2	2.36e-06	3.52448	6.3528	3.19211	7.08675
CSNK1A1	2.36e-06	5.93745	6.80588	5.798	6.88986
DDX60	2.36e-06	4.39069	6.55427	4.02701	6.67457
FAM214A	2.36e-06	7.13488	5.79945	7.25798	5.80776
NQO2	2.36e-06	5.99914	8.15949	6.15794	7.88544
SYK	2.36e-06	8.24205	4.75454	8.37019	3.55875
WDR82	2.36e-06	7.97385	8.47591	8.12827	8.47865
SLC25A20	2.36e-06	5.76995	6.80194	5.69508	6.85982
USP44	2.36e-06	3.1926	7.38229	3.01731	7.59414
SLC17A9	2.36e-06	4.51634	3.46213	4.58414	3.29755
MEF2C	2.36e-06	7.87635	3.99424	7.77716	3.11973
TBC1D1	2.36e-06	5.93602	4.82181	5.85043	4.85477
SLC40A1	2.36e-06	2.88836	5.49825	2.86446	5.71432
WASHC4	2.36e-06	7.42998	6.35695	7.49677	6.33788
FYB1	2.89e-06	3.38114	7.18148	3.08943	8.27535
LDLRAP1	2.89e-06	6.14714	4.04934	6.33649	3.7715
PCSK5	2.89e-06	3.16814	4.69375	3.12743	4.36919
MAP3K1	2.89e-06	9.20546	7.21609	9.11296	7.36624
NUMA1	2.89e-06	7.31198	6.58069	7.33075	6.55235
SLC9A3R1	2.89e-06	6.74335	8.67795	6.53889	8.68768
VPS26B	2.89e-06	5.96318	7.20249	5.91379	7.18669
ITM2A	3.54e-06	3.21177	9.24627	2.67027	11.5608
ENO2	3.54e-06	5.15975	6.61613	5.20916	6.56011
CSNK1E	3.54e-06	7.86483	7.01503	7.95005	6.97028
GSK3B	3.54e-06	7.49973	8.48318	7.5263	8.5763
YPEL3	3.54e-06	7.51072	5.23964	7.76084	4.86376
MAGEE1	3.54e-06	3.90609	5.45945	3.79148	5.7869
NUDC	3.54e-06	10.0069	10.5358	10.1056	10.5572
MEA1	3.54e-06	8.88505	9.73159	8.91597	9.97374
ZSCAN9	3.54e-06	5.1419	3.66295	5.31559	3.46917
RTN2	3.54e-06	3.99011	3.38339	3.73253	3.38569
LRRC20	4.31e-06	4.96332	6.1317	5.23463	6.13463
CD79A	4.31e-06	7.2289	4.23705	7.4512	3.49777
GIMAP5	4.31e-06	3.13478	5.89094	2.91388	6.29207
HHIP	4.31e-06	3.15834	5.62128	3.00321	5.691
LAT2	4.31e-06	7.83329	4.39475	8.29066	3.45357
PGRMC1	4.31e-06	7.84058	8.71563	7.9391	8.79131
MMP11	4.31e-06	4.18879	3.62587	4.15802	3.63923
PAQR3	4.31e-06	4.09486	4.9914	4.03275	5.02457
PAN3	4.31e-06	5.75107	4.50189	5.6248	4.55955
MAPK7	4.31e-06	4.2398	4.98237	4.28482	4.91922
CDK14	5.23e-06	5.2809	3.93159	5.39929	3.824
BATF3	5.23e-06	4.05767	6.82393	3.98434	6.67788
IRX5	5.23e-06	4.45564	6.81886	4.24386	7.1488
HSDL1	5.23e-06	4.86949	5.95474	4.68603	5.91462
FLNA	5.23e-06	4.91458	6.16615	4.71338	6.2247
GALNT14	5.23e-06	6.26686	3.50768	6.37835	3.45194
SH2B2	5.23e-06	4.21406	3.3112	3.88024	3.27271
SCPEP1	5.23e-06	7.52606	5.89137	7.55713	6.22617
MAGED2	5.23e-06	5.92586	6.94684	5.84283	6.92533
OFD1P17	5.23e-06	9.55136	7.9815	9.26961	8.05332
PLS1	5.23e-06	4.93694	7.27137	4.5305	7.35924
TMEM71	5.23e-06	3.46518	5.52699	2.9969	5.95627
TMEM237	5.23e-06	5.73818	7.18934	5.79156	7.27123
GLIPR2	6.34e-06	4.59679	6.86653	4.09147	7.12424
KIF3A	6.34e-06	4.13085	5.2021	4.07533	5.23182
ABCD3	6.34e-06	5.74035	6.5861	5.70013	6.61712
ALDH1A2	6.34e-06	2.96895	5.8425	2.98448	7.11292
AQP3	6.34e-06	3.36272	5.05646	3.23201	5.00027
MAPK13	6.34e-06	4.57308	3.71991	4.27611	3.71423
USB1	6.34e-06	4.07855	4.4432	4.0136	4.52213
PAFAH1B3	6.34e-06	8.20075	9.1337	8.34056	9.30999
USP32	6.34e-06	5.42221	6.10962	5.46425	6.04688
PRKCQ	6.34e-06	4.01907	6.30573	3.90755	6.72343
SLC15A3	6.34e-06	4.76897	3.6922	4.68827	3.57492
POU3F2	6.34e-06	2.84709	4.61503	2.83323	4.26227
RASAL1	6.34e-06	3.99937	3.17395	3.90105	3.07856
ADGRD1	7.65e-06	3.55062	3.15326	3.34308	3.14357
DHTKD1	7.65e-06	7.77836	7.136	7.71222	7.2656
ATP8A2	7.65e-06	3.24531	4.09713	3.08549	3.94306
DAGLB	7.65e-06	5.02257	3.74309	4.85139	3.68198
ENPP4	7.65e-06	4.17785	5.38071	3.75354	5.29113
IRF4	7.65e-06	5.86152	3.73968	6.05452	3.27129
C16orf86	7.65e-06	4.07888	3.45185	3.97346	3.44807
ZCCHC9	7.65e-06	7.6782	8.3823	7.72541	8.38197
MTMR2	7.65e-06	6.42079	7.28389	6.39984	7.37379
OCIAD2	7.65e-06	7.19041	9.78163	8.17741	10.0227
RAP1GDS1	7.65e-06	6.98967	8.15843	7.10881	8.1859
NFATC4	7.65e-06	3.63501	3.21222	3.70028	3.1847
SIPA1	7.65e-06	6.42363	4.72297	6.65748	4.57162
BEX4	9.2e-06	4.01374	8.78946	3.2382	10.068
CCSER2	9.2e-06	4.4269	5.11552	4.451	4.98667
EGLN1	9.2e-06	6.7857	5.31491	6.68298	5.41497
ELMO2	9.2e-06	3.98608	4.39627	3.99184	4.44027
GIMAP1	9.2e-06	3.30906	4.92464	3.20555	4.3338
DEF6	9.2e-06	6.27635	7.4217	6.49688	7.49457
ALOX5	9.2e-06	4.31921	2.86388	3.67366	2.86349
CREBBP	9.2e-06	6.53394	5.84864	6.49003	5.80003
FHL2	9.2e-06	3.21989	4.70744	3.20853	4.02321
GNA15	9.2e-06	4.99287	7.5233	4.61325	7.9543
CABIN1	9.2e-06	5.81186	6.41537	5.87457	6.3642
TMPRSS3	9.2e-06	3.24414	3.61298	2.93475	3.46518
SLC35A4	9.2e-06	4.36503	5.14109	4.3244	5.20797
SNX25	9.2e-06	7.04129	5.59116	7.02196	5.63623
PARP1	9.2e-06	8.46371	7.39689	8.68532	7.34657
ST6GALNAC4	9.2e-06	5.2362	3.98262	5.00151	3.80202
TTC39B	9.2e-06	3.16874	3.67414	3.17111	3.46684
PPP1R1C	9.2e-06	3.16948	4.43919	3.08084	4.20722
C1orf122	1.1e-05	7.99414	8.77835	8.279	8.86208
INPPL1	1.1e-05	6.85561	6.05091	6.71948	5.958
GIMAP6	1.1e-05	3.23189	4.29751	3.14479	4.21931
GPHN	1.1e-05	4.23163	6.86556	3.44832	6.92298
FAM222B	1.1e-05	4.24368	4.56296	4.21924	4.51754
LINC00341	1.1e-05	9.67784	6.64679	9.60441	6.65748
DIP2C	1.1e-05	6.74888	3.93976	7.23517	3.61078
SIGLEC10	1.1e-05	3.74462	3.15284	3.48926	3.12921
MB21D2	1.1e-05	3.16173	4.24032	3.1591	3.78578
STXBP1	1.1e-05	4.1885	4.84211	4.12304	4.9051
TUSC2	1.1e-05	5.96349	6.79998	6.14026	6.82103
TMEM62	1.1e-05	3.87138	3.5426	3.79066	3.54361
HLA_DPB1	1.32e-05	6.35578	3.65597	6.65895	3.22515
KANSL1L	1.32e-05	4.04701	3.59411	4.02914	3.55042
ECI1	1.32e-05	10.0569	6.64212	10.1115	7.20129
ABCB4	1.32e-05	5.08981	3.15019	5.18348	3.13598
C1orf216	1.32e-05	3.73634	4.43887	3.63388	4.43132
EVL	1.32e-05	6.58475	8.10967	6.4985	8.18253
LILRB4	1.32e-05	3.67706	2.98969	3.3738	2.89379
SLC25A38	1.32e-05	8.22725	8.83457	8.29241	8.83955
ZNF600	1.32e-05	7.52332	5.66975	7.56671	5.81638
ERO1A	1.58e-05	6.01018	6.99207	5.9402	6.85368
CYSTM1	1.58e-05	6.72582	9.67322	6.89768	9.6264
JPT1	1.58e-05	8.85351	9.84257	8.96909	9.82911
INPP5D	1.58e-05	4.88361	4.24588	4.76017	4.17077
ARHGAP26	1.58e-05	3.96614	5.20579	3.86065	5.02778
HLA_DPA1	1.58e-05	10.6317	4.65798	11.1672	3.62647
CANT1	1.58e-05	3.95669	4.48937	3.97227	4.42696
POMGNT1	1.58e-05	4.56182	5.21578	4.5137	5.19166
TESPA1	1.58e-05	4.77932	6.82064	4.96494	6.96401
ST6GAL1	1.58e-05	7.35206	5.09461	7.25079	5.25349
PRKCE	1.58e-05	7.12481	5.28704	7.2202	5.21314
SCD	1.58e-05	7.76576	8.7429	7.90659	8.70088
NDUFB6	1.58e-05	9.27461	9.8737	9.28524	9.9097
MLLT3	1.58e-05	3.73499	5.09835	3.5272	4.91824
RAD21	1.58e-05	9.69767	10.4057	9.69807	10.4227
ZNRD1	1.58e-05	9.33691	9.8676	9.37206	9.90655
PIP4K2A	1.58e-05	3.84946	4.43329	3.7629	4.40679
TCF7	1.58e-05	3.50102	6.48331	3.48175	7.48991
ORMDL3	1.58e-05	5.79852	6.53178	5.69354	6.46302
SRD5A3	1.58e-05	5.568	6.84757	5.57389	7.11957
ZFHX3	1.58e-05	4.26978	3.42263	4.13398	3.34533
ID3	1.88e-05	9.63609	7.50913	9.80017	7.64228
CD9	1.88e-05	9.09042	5.04531	10.5199	4.49451
ASF1A	1.88e-05	8.1458	9.15536	8.12514	9.33339
FAIM	1.88e-05	7.10157	4.73017	7.43365	4.62078
IRS2	1.88e-05	6.41641	4.507	6.54442	4.30061
CIITA	1.88e-05	3.54967	3.05818	3.55084	2.92847
KLF9	1.88e-05	4.61477	3.88874	4.38927	3.94695
ECI2	1.88e-05	6.33842	7.24487	6.71246	7.35458
LRFN3	1.88e-05	3.2861	3.55126	3.2465	3.55986
ADRB2	1.88e-05	4.84689	3.58203	4.03476	3.55673
TRIM37	1.88e-05	5.65307	6.29324	5.5916	6.15417
RFESD	1.88e-05	4.50173	5.62707	4.39078	5.75382
TMEM243	1.88e-05	9.51598	8.16769	9.51284	8.1911
TXLNB	1.88e-05	3.76659	3.1297	3.55626	3.09058
SLC15A2	1.88e-05	3.74812	3.16005	3.65173	3.16483
TSLP	1.88e-05	3.11142	3.34048	3.11141	3.30939
TRABD	1.88e-05	5.4503	4.71452	5.54808	4.69176
PLCG1	1.88e-05	4.90898	6.14876	4.84367	6.08341
TIFA	1.88e-05	7.83534	6.47022	8.00315	6.38031
LRRK1	2.23e-05	3.55105	3.17655	3.47293	3.14898
ACOX1	2.23e-05	5.72786	6.40377	5.85945	6.41888
HEXIM1	2.23e-05	6.73307	7.79093	6.69872	7.78835
BTG2	2.23e-05	6.01172	4.25393	6.29652	4.01928
EXOC2	2.23e-05	6.48673	7.09534	6.50369	7.06484
IL2RB	2.23e-05	3.30499	5.45031	3.21708	4.54154
CHD7	2.23e-05	6.20486	4.84392	6.42936	5.25246
SVOPL	2.23e-05	2.78608	3.9967	2.7458	3.37386
PIGU	2.23e-05	6.3959	7.18304	6.46996	7.26694
TST	2.23e-05	7.71003	5.05415	8.08655	5.00046
RORA	2.23e-05	3.52791	5.49296	3.24049	5.35521
TLR2	2.23e-05	3.24771	2.8316	2.98667	2.79631
TRPV2	2.23e-05	3.92077	4.77556	3.95041	4.66732
PRRC2B	2.23e-05	5.3151	4.87324	5.3529	4.94353
MS4A1	2.23e-05	5.8957	3.0852	4.37784	2.96778
SLC19A2	2.23e-05	3.84383	5.07222	3.62312	4.91094
PGM2L1	2.23e-05	4.64217	6.42753	4.28897	6.62629
RFX8	2.23e-05	3.27279	5.70731	2.9332	6.02495
RHBDD2	2.23e-05	6.24558	7.24948	6.269	7.33275
NEIL1	2.23e-05	6.44994	3.7559	6.19193	3.66863
MAFB	2.23e-05	3.23577	3.83598	3.24152	3.60836
PATL2	2.23e-05	4.9238	3.73244	5.05558	3.41777
ZNF165	2.23e-05	4.44017	3.72432	4.37439	3.65556
FCMR	2.64e-05	6.12037	4.2039	5.92682	3.85294
KLHL2	2.64e-05	5.59874	4.34542	5.48634	4.20874
APBB1IP	2.64e-05	7.1674	5.53192	7.30825	5.8459
C16orf74	2.64e-05	5.35344	3.3434	5.56311	3.3447
GNB1L	2.64e-05	4.18576	4.98599	4.07986	5.12578
GNAQ	2.64e-05	5.44444	7.82583	5.67548	8.20638
HMGN5	2.64e-05	4.89886	6.90423	4.45785	7.24231
SLC45A4	2.64e-05	4.08121	4.84446	3.97992	4.80983
ZNF438	2.64e-05	3.97657	4.9078	3.93104	4.88759
NINL	2.64e-05	4.17554	6.07722	4.03918	6.61769
TMCO4	2.64e-05	5.41769	4.06558	5.48245	3.94968
RPE	2.64e-05	6.79926	6.38581	6.83333	6.31644
RASGRP2	2.64e-05	8.59224	6.82294	8.66661	6.53063
PPFIBP2	2.64e-05	4.16761	3.08049	3.55438	3.03339
RALGAPA1	2.64e-05	3.54916	3.9465	3.58517	3.84657
ZHX3	2.64e-05	4.42868	4.96224	4.29243	4.86542
VPS45	2.64e-05	6.01299	6.89352	6.02832	6.78733
METTL7A	2.64e-05	5.6159	4.03204	5.40013	3.77666
TMEM192	2.64e-05	4.50035	3.83059	4.42721	3.83413
TBC1D14	2.64e-05	6.45345	5.2942	6.40619	5.3164
TBXA2R	2.64e-05	3.65886	3.25551	3.48806	3.2614
RCSD1	2.64e-05	7.86415	6.24931	7.8836	6.12439
UNC13D	2.64e-05	3.61755	4.3176	3.57625	4.24113
DHFR2	3.12e-05	3.34207	3.74317	3.24162	3.76635
EXPH5	3.12e-05	3.1476	3.48354	3.12679	3.44566
ISG15	3.12e-05	7.98252	9.3278	8.01066	9.17098
JAM3	3.12e-05	3.56686	4.95483	3.36874	4.80856
CD28	3.12e-05	2.98041	4.53123	2.98217	4.03074
ICOS	3.12e-05	3.0879	4.59027	3.10252	3.82841
KIFAP3	3.12e-05	6.52489	7.47062	6.5763	7.47206
EXT1	3.12e-05	3.52654	4.72151	3.23664	4.85675
PELI3	3.12e-05	3.62309	3.22396	3.56	3.2051
SOX7	3.12e-05	4.71977	3.22593	3.76634	3.22914
STAM	3.12e-05	6.53587	7.70804	6.4811	7.65729
PLEKHG4B	3.12e-05	4.00428	3.43949	3.93608	3.40045
THUMPD3	3.12e-05	6.99611	7.60963	6.97751	7.72126
RHOC	3.12e-05	6.02743	7.8475	6.20152	7.66684
ADAMTS1	3.67e-05	3.91887	5.17388	3.83999	4.97209
HLA_DRB1	3.67e-05	7.94806	5.12149	7.92651	4.67503
LSR	3.67e-05	5.35348	4.33643	5.22311	4.30871
ERO1B	3.67e-05	5.10654	3.84318	4.71136	3.69732
BIVM	3.67e-05	4.40174	6.15778	3.97769	6.20287
JCHAIN	3.67e-05	6.87306	2.98625	7.16732	2.87469
BCL11A	3.67e-05	5.46606	4.27847	5.36442	4.41225
ECT2	3.67e-05	6.4754	7.18851	6.56875	7.23639
LY6G5C	3.67e-05	3.38451	3.82674	3.3655	3.73348
DPF3	3.67e-05	3.11492	3.31851	3.11535	3.33501
HIP1	3.67e-05	3.69447	3.39464	3.55093	3.33305
LINC01013	3.67e-05	4.11538	3.0994	3.40262	3.11461
P4HA2	3.67e-05	5.74909	3.28608	5.72569	3.19546
MFSD6	3.67e-05	5.51485	6.5305	5.58551	6.59653
NEDD1	3.67e-05	6.8393	7.60677	6.85645	7.68156
TMEM38A	3.67e-05	5.53726	4.31224	5.66974	4.19538
PPP3CC	3.67e-05	8.55248	7.38638	8.58563	7.3074
ZNF382	3.67e-05	5.0215	6.02351	4.97515	6.05439
MAPKAPK2	3.67e-05	5.38123	4.51204	5.34821	4.36926
D2HGDH	4.32e-05	4.82836	4.31794	4.77319	4.2278
HIRA	4.32e-05	7.60014	8.49884	7.7343	8.66493
LCP2	4.32e-05	6.0403	8.93195	6.65716	9.14298
ERP29	4.32e-05	11.3591	10.805	11.401	10.7415
CD74	4.32e-05	8.73209	3.96845	9.55747	3.07257
DCUN1D1	4.32e-05	5.09842	5.93988	5.15564	5.91846
GALNT6	4.32e-05	3.48641	5.52301	3.33716	5.01991
JDP2	4.32e-05	5.04764	4.10014	5.01983	3.87332
BANK1	4.32e-05	4.60313	3.0187	3.56299	2.95073
DEXI	4.32e-05	5.25038	6.5255	5.31534	6.67096
TMEM52	4.32e-05	3.82595	3.46233	3.88402	3.47159
STK38	4.32e-05	9.12331	7.93142	9.26098	7.90502
PEX5L	4.32e-05	3.01961	3.875	3.02781	3.38043
RAB22A	4.32e-05	7.34944	8.04738	7.30944	8.05011
S'MARCB1	4.32e-05	6.85957	6.06	6.86233	6.11703
KCNK12	5.07e-05	6.8774	3.7304	7.29183	3.6365
LCMT1	5.07e-05	7.56579	8.24419	7.52766	8.23486
HLA_DOA	5.07e-05	4.57197	3.62884	4.63801	3.37533
GRAMD1A	5.07e-05	7.54589	6.74779	7.54373	6.76005
ICAM3	5.07e-05	7.28657	9.4715	7.95584	9.77936
FAM169A	5.07e-05	3.49639	5.14709	3.17502	5.50494
CREM	5.07e-05	4.37473	4.94934	4.29082	4.81818
LASP1	5.07e-05	4.10071	4.38101	4.10006	4.35352
FAM49A	5.07e-05	4.74722	3.50517	4.80272	3.07684
ELOVL5	5.07e-05	8.94958	9.79807	8.87591	9.78283
CCNDBP1	5.07e-05	9.97655	9.25741	9.88438	9.09726
GSAP	5.07e-05	4.68696	3.57524	4.25893	3.23713
FAM19A2	5.07e-05	3.11143	3.39502	3.06749	3.32555
PLD6	5.07e-05	4.99473	3.90565	4.93081	3.87322
PFKL	5.07e-05	5.38158	4.41378	5.53294	4.29591
MSL3P1	5.07e-05	3.65569	5.99124	3.3496	6.41838
PSMB6	5.07e-05	10.0979	10.7735	10.2289	10.7988
PRIM2	5.07e-05	5.30648	5.95067	5.31134	5.93117
PSAP	5.07e-05	9.23019	10.275	9.16593	10.2971
PDLIM5	5.07e-05	3.78389	4.41432	3.73014	4.22337
PSMD12	5.07e-05	7.82504	8.27001	7.78033	8.28667
MICALL1	5.07e-05	6.21888	5.37524	6.25163	5.33805
QRSL1	5.07e-05	6.81585	5.36683	6.61087	5.42434
DUSP22	5.93e-05	5.12387	4.23976	4.84679	4.15859
FNBP1	5.93e-05	6.63701	8.42648	7.06709	8.48679
AGPS	5.93e-05	6.53487	7.27748	6.49408	7.22692
FADS3	5.93e-05	7.90738	5.72538	7.94447	5.67792
GZMM	5.93e-05	3.19045	4.3194	3.18923	3.74085
GCH1	5.93e-05	6.00137	7.25017	6.20886	7.24555
AC140479.3	5.93e-05	6.9236	7.91265	6.85061	7.91644
BLVRA	5.93e-05	5.75843	7.72739	5.25429	7.82749
LMO4	5.93e-05	6.35144	5.24693	6.19562	5.23337
FCRLA	5.93e-05	5.94965	3.31945	5.67832	3.32091
B4GALT2	5.93e-05	6.03093	5.00967	6.02919	4.98074
CD70	5.93e-05	7.5506	4.96142	8.02048	4.11263
LZTS2	5.93e-05	5.33742	4.23058	5.20532	4.09265
CPM	5.93e-05	3.81676	3.17063	3.7184	3.17272
GIPC1	5.93e-05	4.23978	5.09139	4.30782	5.31578
MAPKAPK3	5.93e-05	5.87029	6.95344	5.82721	6.86687
SULT2B1	5.93e-05	2.84528	3.07898	2.85105	3.03225
RBM4B	5.93e-05	6.68929	5.82733	6.78605	5.99012
NME3	5.93e-05	6.9912	5.45568	7.0412	5.13511
PTPN18	5.93e-05	5.0332	4.36095	5.06884	4.23911
RNF145	5.93e-05	5.0676	5.78019	5.02173	5.9181
TEX19	5.93e-05	4.09166	6.65445	3.69772	6.92254
TMEM173	5.93e-05	3.72297	4.90403	3.48445	4.89515
TNFRSF17	5.93e-05	4.90414	3.15489	3.24152	2.89659
ADNP	6.93e-05	10.1178	9.66504	10.1266	9.6935
CD1B	6.93e-05	3.07209	6.32429	3.06265	7.2971
DSCAML1	6.93e-05	2.94334	3.74987	2.97283	3.26695
GRK5	6.93e-05	3.42798	4.29015	3.30454	3.99694
DCAF1	6.93e-05	6.47364	7.05452	6.52886	7.00385
BBC3	6.93e-05	5.5482	4.2219	5.62195	3.93223
IL15	6.93e-05	3.44538	4.34465	3.51364	3.97727
GPR18	6.93e-05	8.13596	5.12728	8.6841	4.4787
RIPOR1	6.93e-05	5.09356	3.89239	5.03545	3.88784
NUDT8	6.93e-05	5.58695	6.98674	5.54483	6.73243
MBIP	6.93e-05	7.71395	8.35673	7.86829	8.47104
SLC11A2	6.93e-05	5.48692	5.96439	5.54846	5.96792
MOB1B	6.93e-05	4.95236	5.86758	5.01242	6.00208
PCDH9	6.93e-05	7.59489	4.92636	7.99902	4.76504
ZNF18	6.93e-05	5.98918	6.69116	6.14168	6.87107
PLD4	6.93e-05	3.8903	3.07705	3.91479	3.0838
LGR6	8.07e-05	5.47782	3.57057	4.36713	3.46714
CUX1	8.07e-05	4.90316	4.39654	4.76051	4.48707
HPS4	8.07e-05	7.78137	5.80663	7.43947	5.77305
HDAC9	8.07e-05	3.85103	3.37361	3.84255	3.28373
ATP8A1	8.07e-05	4.16204	3.49176	3.99189	3.4029
GRSF1	8.07e-05	7.99381	8.65838	7.91327	8.79202
LEMD3	8.07e-05	5.80841	5.18242	5.68577	5.10374
KCTD15	8.07e-05	4.50363	3.6921	4.74413	3.51354
DHX58	8.07e-05	4.12615	5.19289	4.09849	5.29724
COQ3	8.07e-05	6.85279	8.19974	6.82545	8.20693
ASPHD2	8.07e-05	6.54815	5.01408	6.86572	4.73023
CMTM7	8.07e-05	8.85186	5.04644	9.69245	3.67228
DOCK5	8.07e-05	3.36958	4.05816	3.35099	3.74061
CSRP2	8.07e-05	6.123	3.82958	6.34187	3.78758
AAGAB	8.07e-05	6.73894	7.33811	6.83433	7.44011
NUCB2	8.07e-05	8.64007	9.95333	8.76978	10.4567
NIN	8.07e-05	6.2237	5.5573	6.18095	5.62432
TMEM185A	8.07e-05	4.45387	5.18263	4.47837	5.20162
NFX1	8.07e-05	6.15913	5.59265	6.26784	5.5131
MKRN3	8.07e-05	3.3687	4.10849	3.1206	4.0842
ZCCHC14	8.07e-05	5.73407	4.82391	5.92374	4.79414
SRRD	8.07e-05	7.99042	6.94299	7.97444	6.99904
HLA_DMB	9.39e-05	5.84152	4.09151	5.31408	3.66281
ANTXR1	9.39e-05	3.22671	3.55649	3.21412	3.62297
LCK	9.39e-05	5.90691	8.86682	6.03509	9.74624
HES4	9.39e-05	3.34579	5.54281	3.3137	4.79823
ABT1	9.39e-05	5.87321	6.3973	5.84441	6.40724
ALDH5A1	9.39e-05	8.45211	6.9476	8.44726	6.84426
DCLRE1A	9.39e-05	5.59383	7.08731	5.51544	6.97453
ARFGAP1	9.39e-05	4.01717	4.64277	3.91318	4.77151
GGT7	9.39e-05	3.21262	3.74855	3.23044	3.57012
HINT2	9.39e-05	8.47491	9.23081	8.45016	9.35419
INPP4A	9.39e-05	5.53783	6.27288	5.49642	6.3783
KIF7	9.39e-05	4.22282	5.06467	4.22819	4.98064
CBX1	9.39e-05	9.02389	10.388	9.69296	10.4454
CHCHD6	9.39e-05	6.34555	7.22282	6.41605	7.30145
CHMP2B	9.39e-05	6.77604	7.49159	6.7283	7.4988
EHMT1	9.39e-05	5.96836	5.32251	5.79587	5.34283
GRINA	9.39e-05	4.91412	4.45412	4.92219	4.42112
NFKBIA	9.39e-05	8.87549	7.88127	8.9027	7.75635
MED12L	9.39e-05	3.06496	3.38615	3.0024	3.35107
SLC4A4	9.39e-05	2.84858	3.26684	2.82702	3.20327
NIPSNAP3B	9.39e-05	4.89347	3.22376	5.00152	3.17131
SLC6A18	9.39e-05	3.86533	3.61401	3.8033	3.58552
PFKM	9.39e-05	8.83109	6.77757	8.87556	7.61288
SUSD3	9.39e-05	8.24042	5.16739	8.62405	4.04501
PIGX	9.39e-05	6.83452	7.50312	6.87059	7.48239
PPP1R11	9.39e-05	6.22423	6.68767	6.19017	6.66182
SHISA2	9.39e-05	3.24219	4.24318	3.00715	4.11698
SSBP3	9.39e-05	6.45736	8.11657	6.59025	8.31164
MAN1C1	9.39e-05	3.43955	2.87274	3.09892	2.85455
DPH7	0.000109	6.36632	5.86623	6.30814	5.91262
CNR1	0.000109	4.0022	3.02627	3.34703	3.05723
CCDC69	0.000109	5.10949	3.93973	5.14702	3.97064
CLIP4	0.000109	3.18033	4.11652	3.17832	4.17287
CYTH3	0.000109	4.54178	4.04669	4.53632	4.01803
DDRGK1	0.000109	7.53993	8.11119	7.68706	8.05219
CLEC2D	0.000109	6.61467	4.10599	7.12001	3.51655
BCL6	0.000109	6.72689	4.45025	7.13485	3.94326
DNAJC8	0.000109	9.22696	9.65104	9.2068	9.65527
TRIM14	0.000109	4.43351	5.09596	4.49649	5.00943
TM2D3	0.000109	5.11401	5.4237	5.05991	5.44906
RHBDF2	0.000109	4.03474	3.57927	3.86836	3.54212
PALD1	0.000109	4.9978	3.88493	5.00289	3.81681
ZSCAN12	0.000109	3.70713	3.22192	3.73037	3.08566
NEIL3	0.000109	6.95514	8.24106	6.73518	8.46182
PSMC4	0.000109	8.0328	8.63277	8.03493	8.66573
POMT1	0.000109	4.56793	5.00727	4.58533	4.98678
PSTPIP1	0.000109	3.56301	3.88099	3.57702	3.70906
SLAIN2	0.000109	5.92173	6.4507	5.9467	6.40979
USP20	0.000109	5.35719	6.84074	5.30612	6.83101
PSMD10	0.000109	8.74449	9.25419	8.73794	9.21868
SLC31A2	0.000109	3.6354	4.33097	3.488	4.16528
GPT2	0.00012	7.56586	4.98553	8.13115	5.37162
GRK2	0.0001262	5.05534	4.27137	5.0151	4.17537
CDK9	0.0001262	6.3662	5.52289	6.40091	5.56602
GEN1	0.0001262	5.64882	4.96357	5.46897	4.92092
FBXW8	0.0001262	4.79572	4.36166	4.72488	4.34828
IL27RA	0.0001262	4.33039	5.16336	4.02875	5.16763
PLEKHG4	0.0001262	3.32331	5.32286	3.04398	5.39135
SAR1A	0.0001262	6.72338	7.20983	6.70502	7.12899
ZDHHC3	0.0001262	4.944	5.18656	4.99731	5.18785
TBC1D2B	0.0001262	5.35769	5.99048	5.32214	6.02848
TXN	0.0001262	10.8527	11.5281	10.9025	11.6986
PIM3	0.0001262	8.11992	7.25447	8.06623	7.46409
XBP1	0.0001262	9.76824	7.98372	9.99995	8.24458
TMEM220	0.0001262	3.58151	3.14037	3.49285	3.12711
SNTB1	0.0001262	6.26654	4.16542	6.31637	3.57567
SLC27A3	0.0001262	3.84517	3.20048	3.79266	3.26388
RFX2	0.0001262	3.51662	3.88676	3.52077	3.80359
PIK3CD	0.0001262	4.83138	4.16243	4.95502	4.05884
MRPL47	0.0001262	10.7142	11.1847	10.6726	11.2259
TCEAL8	0.0001262	6.32956	8.26956	7.35365	8.88499
METRNL	0.0001262	5.31967	3.80142	5.39256	3.61181
TRAF3IP3	0.0001262	4.62971	6.44719	4.53535	6.5057
SDHA	0.0001262	9.71965	9.23121	9.82102	9.2082
KIAA0930	0.0001459	5.68929	4.87405	5.69726	4.71894
LRRC39	0.0001459	3.42651	3.95953	3.25704	3.9174
GCLM	0.0001459	4.58108	5.2316	4.54163	5.17849
AFDN	0.0001459	3.78924	3.407	3.78902	3.38824
C10orf10	0.0001459	3.93728	3.27835	3.86261	3.22918
KBTBD7	0.0001459	5.10339	6.52322	5.15273	6.64682
BAP1	0.0001459	3.86018	4.25697	3.86423	4.17743
FCGR2A	0.0001459	4.32917	3.63391	3.93321	3.44565
CCDC120	0.0001459	3.27514	3.43302	3.28076	3.43458
HVCN1	0.0001459	6.8896	4.98478	6.82141	4.90292
CRY1	0.0001459	6.1493	8.34175	7.35147	8.4663
C11orf24	0.0001459	5.14871	4.54112	5.12596	4.49576
ARPC5L	0.0001459	8.9979	8.38225	9.1133	8.44635
ANKRD13A	0.0001459	8.3338	7.73293	8.17548	7.62441
PTCH1	0.0001459	4.63315	3.61648	4.51415	3.45573
NRARP	0.0001459	3.9575	3.71461	3.91062	3.29649
SCARB1	0.0001459	4.0767	3.75427	4.08045	3.69807
SOWAHD	0.0001459	4.72029	3.38919	4.28787	3.15032
SERINC3	0.0001459	8.21975	8.75474	8.23608	8.70201
SLFN5	0.0001459	3.45554	4.23172	3.35134	4.34192
NHSL1	0.0001459	4.4881	3.54125	4.32374	3.48667
STX10	0.0001459	7.88834	8.44494	8.01827	8.42127
TCF4	0.0001459	8.19272	5.29913	8.76648	4.77612
ZNF264	0.0001459	3.47513	4.02128	3.40448	4.02801
TRIM38	0.0001459	7.87738	6.685	7.78065	6.69883
ZNF445	0.0001459	3.77523	4.2807	3.78133	4.18017
RAB5C	0.0001459	6.13209	6.56386	6.10583	6.50809
GLUL	0.0001684	4.30281	5.11507	4.39188	5.10202
BEND6	0.0001684	3.09248	3.73219	3.00565	3.62401
C3orf33	0.0001684	3.18031	3.44995	3.21386	3.42958
BCR	0.0001684	4.02358	3.73599	4.04355	3.75327
AIF1	0.0001684	4.85637	7.88212	3.98603	8.20409
KCNK5	0.0001684	3.30969	4.29425	3.28525	4.19171
CD180	0.0001684	4.29163	3.06182	3.78719	3.00259
ACTR1A	0.0001684	6.13199	6.68015	6.03966	6.77373
ASRGL1	0.0001684	3.63406	5.94434	3.45238	6.33354
DNAJA1	0.0001684	9.4473	10.0714	9.53894	10.1703
GNA11	0.0001684	5.92444	4.38869	6.10683	4.00814
DLL3	0.0001684	5.13866	4.07629	5.09275	3.71857
FARSA	0.0001684	6.61135	7.36465	6.80223	7.42378
CYSLTR1	0.0001684	4.50769	3.30117	4.40312	3.06108
PSMC5	0.0001684	10.5395	10.9905	10.5999	11.0295
MTHFSD	0.0001684	4.31169	3.96034	4.26122	3.93856
MYO1G	0.0001684	4.58167	6.61604	4.35206	7.26669
RETN	0.0001684	3.26262	4.89985	3.19131	3.58563
RIPK1	0.0001684	4.38716	4.92819	4.3883	4.96819
PKN3	0.0001684	3.93219	3.4571	3.90587	3.39468
NELFB	0.0001684	6.67263	6.18241	6.64049	6.17868
ZC3H12D	0.0001684	3.6116	3.38304	3.58702	3.32233
TOR1B	0.0001684	6.68895	7.29267	6.60625	7.36825
SGSM3	0.0001684	5.83934	5.20006	5.78861	5.24245
ZNF711	0.0001684	3.92756	6.39475	2.96325	6.87911
RELB	0.0001684	5.92152	4.31361	4.96342	3.89597
TCF20	0.0001684	7.58246	8.06458	7.56628	8.14191
MME	0.0001684	6.52376	3.73476	6.81279	3.02179
HES1	0.000194	4.29711	5.16367	4.31448	5.46424
EPB41L4A_AS1	0.000194	10.2988	9.25357	10.303	9.17634
BCAS2	0.000194	6.46516	7.0499	6.51123	6.95415
CTPS2	0.000194	6.26133	4.3064	6.29066	3.64837
DPH3	0.000194	6.70201	7.75386	6.54908	7.69094
KATNAL2	0.000194	3.74093	3.33732	3.62379	3.2695
KIAA0141	0.000194	5.17518	4.68531	5.15273	4.72275
HGSNAT	0.000194	3.86322	4.20869	3.87647	4.25403
EIF5A2	0.000194	3.64386	4.30794	3.43018	4.30053
LANCL1	0.000194	5.66241	6.20725	5.64907	6.19611
IL7R	0.000194	7.26063	3.96109	7.23588	3.28156
FAM212A	0.000194	5.94682	4.50049	5.95304	4.43899
ABHD2	0.000194	4.17976	4.51638	4.19239	4.48607
MAP2K4	0.000194	5.44051	5.98643	5.518	6.04405
PLEKHA5	0.000194	3.54681	4.63789	3.32687	4.60174
ZNF280B	0.000194	3.48166	4.3548	3.37099	4.21392
TMEM14A	0.000194	7.39116	8.42551	7.694	8.30551
YPEL2	0.000194	4.22381	3.5993	4.16307	3.48352
PRKCD	0.000194	5.81177	4.87611	5.78518	4.61229
MSANTD4	0.000194	6.0395	6.48379	6.24391	6.64526
RSAD1	0.000194	3.78448	4.22438	3.68788	4.21477
PHTF1	0.000194	5.17636	4.0812	4.96347	3.97028
SLC9A6	0.000194	5.60135	5.96628	5.5279	5.94818
TPST1	0.000194	4.86059	3.68101	4.84563	3.39815
ZC3HAV1	0.000194	6.67629	7.15434	6.85496	7.11828
CD81	0.000223	9.98784	8.74239	10.0463	9.16351
ENPEP	0.000223	2.85574	3.9097	2.80748	2.99771
DYNC1LI1	0.000223	7.22493	7.53331	7.29028	7.54134
FOCAD	0.000223	6.03635	7.83843	6.43939	7.87918
GNG5	0.000223	12.0822	12.3741	12.0634	12.3381
GNG11	0.000223	5.68021	3.23854	3.62524	3.19996
IFNLR1	0.000223	6.7725	4.24914	7.36199	3.71628
HOXB2	0.000223	3.15805	4.61157	3.17506	3.48218
AKAP6	0.000223	3.27923	3.83466	3.23283	3.74082
C20orf24	0.000223	10.5992	11.1262	10.6512	11.1287
GNAZ	0.000223	4.56947	3.3802	4.49418	3.29808
DRAM1	0.000223	4.68773	3.47581	4.62572	3.33183
SPOPL	0.000223	4.93356	3.89496	4.93213	3.58168
SELL	0.000223	4.55941	7.22003	3.41743	7.66516
PER2	0.000223	3.81579	3.50671	3.7008	3.51725
MSN	0.000223	8.79835	9.6569	8.93718	9.80336
USP6NL	0.000223	4.9105	4.20859	4.98269	4.35946
SCMH1	0.000223	5.82704	5.08795	5.89931	5.18482
TFPI	0.000223	3.78868	5.68172	3.49981	5.57651
ZNF689	0.000223	6.10969	6.58278	6.0707	6.54801
RIC8B	0.000223	5.87209	6.66794	5.98047	6.71102
PTK2	0.000223	4.99538	3.50238	5.07354	3.40181
SVIL	0.000223	5.1534	6.07274	5.46125	6.25086
TOP2B	0.000223	11.416	10.6823	11.5174	10.7043
FANCL	0.000256	6.05754	6.70459	6.12949	6.63416
HENMT1	0.000256	6.20358	8.53824	6.57468	9.09942
CDH4	0.000256	3.37096	4.73871	3.16085	3.64343
ACO1	0.000256	5.53598	6.52437	5.64421	6.5687
EXTL2	0.000256	5.89664	6.77314	6.07748	6.84781
BEX2	0.000256	3.56812	5.15232	3.53675	3.90589
GPER1	0.000256	4.23569	3.40978	3.64363	3.40617
DSCR3	0.000256	6.06722	6.61006	5.98867	6.55206
LARGE1	0.000256	4.45045	3.37209	4.47105	3.18349
CKAP4	0.000256	7.78593	5.73202	8.37953	5.90391
CCDC181	0.000256	2.98447	3.40367	2.9746	3.20642
NXT2	0.000256	4.6882	5.34014	4.74924	5.30532
MPST	0.000256	7.27906	5.48083	7.39305	6.18553
SPRED1	0.000256	4.85323	3.88187	4.76694	3.71351
PHF20	0.000256	4.92977	5.33671	4.88021	5.2545
MAPK8	0.000256	4.45199	5.07698	4.386	4.96192
WDR1	0.000256	6.98873	7.70075	7.05723	7.80749
SULF2	0.000256	4.2645	2.90997	3.26936	2.90328
TNRC6C	0.000256	4.12441	4.94107	4.16042	4.91373
SLC27A5	0.000256	6.44274	7.49632	6.43298	7.73573
SH2D4B	0.000256	4.38943	3.05684	3.44935	3.04265
NDFIP2	0.000256	3.6283	5.45142	3.12621	5.86502
MAGEH1	0.000256	6.04338	7.17666	6.46332	7.50231
POLH	0.000256	5.77482	4.70495	5.81212	4.67076
MAP3K5	0.000256	6.09564	4.3714	6.14967	4.07637
TFPT	0.000256	6.4599	7.48537	6.45657	7.62226
TOLLIP	0.000256	3.79166	3.9687	3.76347	3.97273
PLCB3	0.000256	4.0175	3.66189	3.97986	3.65105
WRNIP1	0.000256	8.51532	8.90474	8.63163	8.94139
VPREB1	0.000256	8.18709	4.55723	9.30865	3.11612
DNMBP	0.0002933	4.93624	4.0902	4.77483	3.99432
CCR9	0.0002933	3.32868	5.4305	3.28124	4.93661
CLK2	0.0002933	9.24707	8.79847	9.19748	8.8254
ADCY9	0.0002933	3.89551	3.40286	3.77661	3.38824
ADRM1	0.0002933	8.04192	8.70777	8.04129	8.84017
DHX35	0.0002933	3.74274	4.25494	3.68278	4.25498
ANKLE1	0.0002933	3.91514	3.41586	3.82518	3.3716
HECTD1	0.0002933	7.88209	7.38612	7.93258	7.30032
ARMC4	0.0002933	2.94115	3.21062	2.90225	3.1507
ACAA1	0.0002933	6.20573	6.77731	6.1952	6.77425
IGFBP6	0.0002933	3.6397	5.11296	3.53111	5.22962
CYP20A1	0.0002933	5.05976	5.62019	5.14257	5.56492
KCTD2	0.0002933	4.3513	4.76561	4.34412	4.77581
POU4F2	0.0002933	2.95816	2.83042	2.92742	2.82568
NCOA1	0.0002933	5.62865	6.59727	5.68429	6.47723
VBP1	0.0002933	8.4293	8.84024	8.33886	8.89577
TMC7	0.0002933	3.06394	3.19019	3.05969	3.21122
MBP	0.0002933	3.51646	3.24649	3.55048	3.14394
NDUFB4	0.0002933	11.1056	11.4224	11.2123	11.4402
MCUR1	0.0002933	8.53717	9.04991	8.49099	9.11798
STAT1	0.0002933	5.4369	6.12118	5.42556	6.14876
RP11_4F5.2	0.0002933	5.75208	3.83107	6.07939	3.43216
NRGN	0.0002933	3.83341	3.10196	3.62376	2.98018
SETD6	0.0002933	4.61941	3.83674	4.64787	3.74153
TGFBR2	0.0002933	5.99953	4.36273	5.87476	4.61303
NIPA2	0.0002933	9.31512	8.82818	9.29995	8.94385
SREK1IP1	0.0002933	5.4571	5.88982	5.50259	5.94362
SUMO3	0.0002933	6.88266	7.58695	6.85021	7.55705
CTR9	0.0003354	8.26268	8.88708	8.27543	8.85223
CCDC50	0.0003354	5.98296	4.37629	6.24053	3.42027
EXOC5	0.0003354	5.86607	6.43789	5.81759	6.34244
JUN	0.0003354	4.11549	5.33703	3.88445	5.42128
ADAL	0.0003354	4.82496	5.60539	4.65145	5.69328
DDA1	0.0003354	5.45734	5.85646	5.50054	5.90915
FLI1	0.0003354	6.65363	5.63396	6.79006	5.54387
DCTN3	0.0003354	8.37821	8.84333	8.42506	8.83748
ADORA2B	0.0003354	3.64678	5.05095	3.29862	4.70418
ANXA6	0.0003354	6.7726	8.42061	7.30077	8.18446
AMER1	0.0003354	3.97244	3.63157	3.96552	3.60531
EPDR1	0.0003354	4.81045	6.07103	4.93684	6.14088
EDEM1	0.0003354	6.37008	5.27826	6.44337	5.09
TM2D2	0.0003354	5.45004	5.88425	5.49114	5.88076
PTPN12	0.0003354	7.69202	6.37223	7.84138	6.30524
PTK2B	0.0003354	5.27794	4.33374	4.92909	4.30822
MAN1A1	0.0003354	6.0529	3.9222	5.96962	3.40984
SMAD3	0.0003354	5.38304	4.62099	5.47643	4.42536
SHQ1	0.0003354	6.35051	7.58719	6.30914	7.81843
SRGAP3	0.0003354	3.14398	3.37932	3.14537	3.37013
SPRYD7	0.0003354	6.24341	5.07729	6.38628	4.8521
STOM	0.0003354	4.73828	3.99175	4.66454	3.6831
UBXN10	0.0003354	3.18602	2.99562	3.1339	2.97076
TMEM268	0.0003354	5.15619	4.54755	5.11562	4.51843
TSEN54	0.0003354	6.97172	7.68724	7.01701	7.77872
SIAE	0.0003354	3.98644	3.34379	4.05906	3.25294
THEMIS2	0.0003354	3.82521	3.41233	3.74958	3.40407
WNK1	0.0003354	6.58675	7.01942	6.5534	6.97037
TRAPPC5	0.0003354	9.7398	10.2201	9.82501	10.2513
ZFP36	0.0003354	8.12241	7.45956	8.05006	7.60082
SEC22C	0.0003354	6.16275	6.70071	6.17942	6.67298
RGL4	0.0003354	3.92076	5.75269	3.78902	5.48254
PHRF1	0.0003354	5.78516	6.23269	5.86651	6.22807
MYCBP2	0.0003354	9.89617	9.33393	9.89491	9.44495
UBE2L6	0.0003354	9.31258	10.1527	9.53908	10.1451
ANAPC15	0.0003829	6.31524	7.44114	6.39263	7.59766
ELF1	0.0003829	8.68301	7.83477	8.58027	7.84123
DAPK1	0.0003829	3.3839	3.63777	3.39025	3.51375
FAH	0.0003829	5.11801	5.80827	5.20339	5.61836
DUSP18	0.0003829	3.50061	3.74555	3.44495	3.74524
HSCB	0.0003829	6.87118	6.3759	6.73427	6.3693
CMPK2	0.0003829	3.32535	3.87232	3.29566	3.78569
ACSL6	0.0003829	2.88281	3.27338	2.87679	3.05291
CHCHD10	0.0003829	7.60776	6.37276	7.81453	6.33386
GLB1L3	0.0003829	2.87437	3.1534	2.83241	3.12627
ARID3B	0.0003829	3.78322	4.69558	3.64411	4.63055
DPY30	0.0003829	9.52477	9.91643	9.54084	9.95502
HYKK	0.0003829	3.29366	3.67045	3.21677	3.56422
KCTD19	0.0003829	3.12144	3.73671	3.05383	3.58675
ACOT8	0.0003829	4.04284	4.3224	3.98266	4.27357
HLA_B	0.0003829	11.8938	10.0004	12.0485	10.2271
NDST3	0.0003829	2.88179	4.24978	2.87975	3.92408
ST3GAL4	0.0003829	3.99577	4.54974	3.82943	4.56606
TRAPPC13	0.0003829	4.79249	5.34604	4.91178	5.38822
RNF122	0.0003829	4.47462	3.91166	4.40876	3.79099
NME7	0.0003829	7.62003	8.50533	7.74111	8.41211
MYEF2	0.0003829	4.33158	6.09793	3.39955	6.42369
RAB5A	0.0003829	6.80661	7.16229	6.8774	7.09352
TGIF1	0.0003829	7.33296	5.57696	7.63951	6.31722
OGFRL1	0.0003829	4.88488	3.72932	4.89462	3.43191
NSFL1C	0.0003829	6.84679	7.36224	6.84655	7.28303
ZNF581	0.0003829	8.19009	7.30632	8.18023	7.35213
TSPAN2	0.0003829	3.11281	4.44455	3.02675	4.86728
RGL2	0.0003829	5.83606	5.38888	5.84324	5.44664
PGAP1	0.0003829	2.94096	3.24566	2.9328	3.22283
PHKB	0.0003829	6.03204	5.50144	5.99982	5.60272
SMDT1	0.0003829	7.5237	7.02343	7.5059	7.07964
HMCES	0.0004035	8.60797	7.73007	8.60944	7.71892
FAT1	0.0004364	4.9902	8.25213	3.92569	9.50322
GSN	0.0004364	5.30936	3.56141	5.20552	3.24658
HDAC3	0.0004364	5.90605	6.30138	5.94491	6.31537
BAG3	0.0004364	5.42412	6.87386	5.80788	6.88693
IRX3	0.0004364	4.33587	7.32162	3.75468	8.4464
APCDD1	0.0004364	4.09365	3.41369	3.83406	3.21102
COQ8A	0.0004364	5.22132	4.57458	5.15719	4.52994
HRK	0.0004364	5.902	3.60063	6.5608	3.49067
HEMGN	0.0004364	2.88326	4.71425	2.78257	3.983
HSPA8	0.0004364	4.50508	4.91568	4.62467	4.97515
LRRC61	0.0004364	4.20059	4.84731	3.91171	4.79563
GNG2	0.0004364	3.82978	4.68502	3.54579	4.78865
CD244	0.0004364	3.21617	4.29437	3.10447	3.9759
LINC02363	0.0004364	4.83167	3.55941	4.23079	3.36421
AC020909.1	0.0004364	4.01072	2.88495	3.21323	2.89292
CSTF3	0.0004364	7.16212	7.78299	7.27003	7.8962
JPH1	0.0004364	4.16275	5.46026	3.83642	5.73603
MFSD5	0.0004364	6.73871	7.25917	6.79361	7.33543
MKRN2	0.0004364	5.34084	5.70582	5.29585	5.77473
TNFSF4	0.0004364	4.04874	3.24083	3.77278	3.04308
ZNF572	0.0004364	3.78587	3.3738	3.75621	3.23525
TP53INP1	0.0004364	4.92878	3.73084	4.8796	3.5594
SELENOO	0.0004364	6.78968	5.94476	7.04567	5.95007
TET1	0.0004364	3.89581	4.98378	3.5865	4.72243
TDRD9	0.0004364	2.78405	3.61708	2.77372	3.00187
ZBTB7C	0.0004364	3.45653	3.60293	3.43316	3.55522
PLCL2	0.0004364	6.1726	4.80296	6.45173	4.56676
RARRES3	0.0004364	5.38	7.16327	5.53377	7.12913
ZNF512B	0.0004364	4.10602	4.68239	4.17701	4.72143
RASSF2	0.0004364	5.42592	4.45073	5.42401	4.66286
TMEM50A	0.0004364	9.26151	9.72043	9.2153	9.62691
SDHB	0.0004364	8.65214	9.10977	8.71276	9.16938
RYK	0.0004364	6.48319	8.3766	6.89618	8.35586
PARP15	0.0004364	4.2905	3.27598	3.87823	3.06742
TRIQK	0.0004364	4.82009	6.56764	4.25359	6.90645
USP28	0.0004762	4.19678	3.84483	4.05177	3.81322
ITGAL	0.0004966	3.64336	4.94343	3.19762	4.51875
CCNB1	0.0004966	8.89403	9.66508	8.85861	9.75427
GUK1	0.0004966	9.32251	9.96767	9.29745	10.1023
FMNL2	0.0004966	5.52103	3.84482	5.95072	3.48311
KIF16B	0.0004966	4.59945	3.71589	4.70087	3.42863
GLB1L2	0.0004966	3.91616	5.59773	3.52729	5.99051
BATF	0.0004966	4.71121	6.52309	4.53024	6.25404
ECHDC1	0.0004966	7.50721	8.3245	7.71602	8.43593
C9orf78	0.0004966	8.77331	9.57532	8.80071	9.71304
FAAP20	0.0004966	3.6638	3.89732	3.61473	3.85422
GSS	0.0004966	6.85231	7.35088	6.94435	7.28575
FPGS	0.0004966	5.94811	5.09308	5.91166	5.24273
AKAP12	0.0004966	6.85877	3.56196	7.33507	3.18681
GATAD1	0.0004966	7.14654	6.26513	7.32258	6.016
HLA_DRB5	0.0004966	4.65879	3.66294	3.51135	2.75596
GLOD4	0.0004966	7.88083	8.51241	7.87742	8.51589
CLECL1	0.0004966	5.27622	3.43294	6.10118	3.14973
SCN8A	0.0004966	2.95843	3.1539	2.95654	3.12066
TEX2	0.0004966	5.42114	6.22188	5.43266	6.31715
USP51	0.0004966	3.56153	4.23461	3.41866	4.27063
TMEM167A	0.0004966	8.92609	9.41446	8.93186	9.35577
TMEM41A	0.0004966	6.35907	6.87461	6.36567	6.82631
MYLK	0.0004966	6.74312	3.71334	8.24267	3.49078
RIOK3	0.0004966	7.87343	7.33134	7.73996	7.3555
NDUFA6	0.0004966	10.1876	10.7585	10.2957	10.6908
PPM1F	0.0004966	3.89854	3.48037	3.84938	3.49478
NSMF	0.0004966	4.15067	3.81986	4.07187	3.7036
NR2F6	0.0004966	3.86359	3.57894	3.83941	3.56283
OR10AG1	0.0004966	3.20223	3.03778	3.15727	3.00009
TIPRL	0.0004966	7.66177	8.15283	7.68668	8.07606
PRKCA	0.0004966	3.84414	4.657	3.8088	4.59354
PRDX1	0.0004966	12.4662	11.7829	12.675	12.0453
NEK6	0.0004966	4.89053	4.00836	4.73928	3.64368
SDC1	0.0004966	4.22872	3.49745	3.98952	3.50264
MSL2	0.0004966	6.34067	6.95506	6.41761	6.87606
ZSCAN25	0.0004966	4.33542	4.72546	4.30074	4.81059
CENPV	0.0005642	8.38481	10.2991	8.52778	10.4572
HEY2	0.0005642	4.5947	3.07824	4.74835	3.03151
B4GALT1	0.0005642	3.67793	3.53372	3.61079	3.503
HLA_DQA1	0.0005642	5.46389	3.96156	4.78836	3.10827
ICOSLG	0.0005642	3.66079	3.37782	3.65382	3.3914
BEST3	0.0005642	4.87372	2.9124	3.78531	2.92735
GPA33	0.0005642	3.10802	3.86106	3.10585	3.71042
IFI30	0.0005642	9.39547	7.18516	9.64865	7.18326
NRAS	0.0005642	7.64966	8.35654	7.72814	8.30475
TEX30	0.0005642	7.46138	8.5385	7.73782	8.75175
NIPAL2	0.0005642	3.49893	3.21953	3.51709	3.03617
TRIB1	0.0005642	4.60884	3.99491	4.3919	3.82199
MTERF2	0.0005642	5.87472	4.66813	5.83824	4.73174
UIMC1	0.0005642	5.85787	5.44339	5.81312	5.43749
STK24	0.0005642	5.08795	4.63428	5.03273	4.57018
YBX2	0.0005642	3.12304	4.64686	3.11306	4.86614
NUP37	0.0005642	8.31397	8.77143	8.40801	8.8247
PHKA1	0.0005642	3.06252	4.20928	2.99486	4.32718
RBMS2	0.0005642	3.59589	3.95471	3.6105	3.99993
TDRD3	0.0005642	5.82217	6.37428	5.84373	6.31581
NEXMIF	0.0005642	3.18346	3.95305	3.17296	3.86316
NINJ1	0.0005642	5.37081	4.2105	5.56787	4.18609
SLC25A13	0.0005642	5.75575	4.73637	5.57087	4.71303
CMTM3	0.00064	6.32943	8.19016	6.44781	8.18989
C11orf1	0.00064	7.5085	8.58543	7.68223	8.70228
CLCN4	0.00064	4.04256	3.10564	3.52408	3.10585
CLEC9A	0.00064	2.84081	3.11273	2.83003	2.99029
CYBA	0.00064	10.9317	10.0249	10.9968	9.98881
HDDC2	0.00064	9.95968	9.19565	10.0611	9.35054
CACNA1A	0.00064	4.69156	3.68116	4.05806	3.38862
CD1A	0.00064	3.20811	6.51724	3.13264	7.45023
C1orf54	0.00064	6.75859	4.97388	6.88989	4.66645
ATPIF1	0.00064	9.60246	9.96809	9.58985	10.0615
BTBD9	0.00064	3.00465	3.161	2.98627	3.18324
GPC3	0.00064	3.16188	3.69553	3.14172	3.34945
EZH1	0.00064	6.35588	5.85164	6.25733	5.88766
FBXO41	0.00064	5.90258	5.19189	5.91483	5.20308
CSTF2	0.00064	5.64881	6.18326	5.56765	6.17097
BCL2	0.00064	5.35419	4.32314	5.05581	4.26491
AP5M1	0.00064	5.9987	6.46668	5.92708	6.50455
C12orf75	0.00064	7.67551	8.77876	7.57792	9.02197
C15orf40	0.00064	5.06126	4.67249	5.14149	4.66929
SMAD7	0.00064	3.57586	3.29598	3.5237	3.2415
NUDT16	0.00064	4.52211	4.07763	4.56487	4.02541
STAT5A	0.00064	5.41482	7.80572	5.15193	7.69123
RBM38	0.00064	8.29741	6.77896	8.11937	6.7842
MAPRE1	0.00064	9.6508	10.1157	9.57812	10.0237
VMP1	0.00064	7.55793	8.08309	7.49147	7.99184
MBOAT7	0.00064	4.44382	5.08343	4.4485	5.11258
RDH10	0.00064	4.16151	5.2053	4.09377	4.93011
RNF11	0.00064	4.02598	4.78033	4.21356	4.76665
STXBP5	0.00064	3.75573	4.29124	3.69354	4.31403
SNHG7	0.00064	6.47651	5.76997	6.44427	5.76671
TCIRG1	0.00064	6.22743	4.87167	6.52228	4.16433
ZYG11B	0.00064	4.64722	4.29876	4.72848	4.32896
MRNIP	0.00064	4.82186	4.55637	4.83422	4.50468
PGPEP1	0.00064	3.5908	3.99276	3.51531	3.92453
SPI1	0.00064	3.49407	3.20018	3.46314	3.18416
EMC3	0.0007247	8.68569	9.13432	8.7014	9.16657
HCP5	0.0007247	5.23634	3.75139	5.37332	3.38282
CTSZ	0.0007247	6.09574	4.25307	6.38624	3.72305
HLA_F	0.0007247	4.53294	3.70105	4.51047	3.32055
C1R	0.0007247	3.7069	4.32932	3.59094	4.20047
FBXO10	0.0007247	4.37722	3.7824	4.45871	3.79832
CAMK2D	0.0007247	6.22885	4.57942	6.44929	4.67239
CHPF2	0.0007247	4.8986	5.29818	4.94261	5.25461
ARHGAP15	0.0007247	8.72247	9.32088	8.72084	9.27366
GPR171	0.0007247	2.97231	3.77434	2.92348	3.24607
FAM92A1P1	0.0007247	3.74021	5.53896	3.17378	6.02729
CCDC138	0.0007247	6.76046	7.78152	6.7135	7.61162
FBXO25	0.0007247	6.26861	7.08765	6.3714	7.30114
ENG	0.0007247	4.89582	3.29793	4.59815	3.27094
SLC6A6	0.0007247	3.72639	4.02626	3.67681	4.02634
RALBP1	0.0007247	7.32009	6.89907	7.38122	6.89532
RGS10	0.0007247	8.5575	9.68831	8.5598	9.78062
PLEKHH1	0.0007247	2.9721	3.11418	2.9601	3.05822
PPP6R1	0.0007247	7.22101	7.67927	7.31787	7.76231
SLC27A4	0.0007247	5.67143	6.04055	5.66092	6.10721
MAP1LC3B	0.0007247	8.89697	8.10691	8.7201	8.12148
STAT5B	0.0007247	4.94596	5.96767	4.77078	5.67676
PLGRKT	0.0007247	7.56012	8.45237	7.61178	8.60046
NAXD	0.0007247	3.67711	4.02688	3.64618	3.9678
SESN1	0.0007247	6.56938	5.30431	6.72734	5.24032
MYCN	0.0007247	3.19301	4.3802	3.16849	3.76207
LZTFL1	0.0008195	4.87541	6.45447	4.86056	7.12908
CAST	0.0008195	6.47669	5.11664	6.53324	4.82647
DENND6B	0.0008195	4.69322	3.59882	4.51329	3.38841
FZD6	0.0008195	4.2368	6.1361	3.73593	6.60116
EME1	0.0008195	7.2013	7.86008	7.33898	7.81382
ELF2	0.0008195	7.69412	7.23399	7.7192	7.25348
BCAR3	0.0008195	4.13655	3.2791	3.72106	3.27043
BAZ2A	0.0008195	5.85715	5.49885	5.70545	5.45851
FAM159A	0.0008195	3.93954	3.28284	3.64892	3.22402
FCRLB	0.0008195	3.40109	3.1067	3.32437	3.0846
AKAP11	0.0008195	7.81395	7.30459	7.76491	7.23451
GADD45GIP1	0.0008195	8.06597	8.65111	8.08024	8.7996
CTDSP1	0.0008195	5.34728	4.83025	5.23902	4.77585
ALDH3A2	0.0008195	5.11925	4.10684	5.0781	3.79215
AP2S1	0.0008195	8.82096	9.32913	8.87629	9.4124
CD55	0.0008195	7.4053	5.48636	7.80542	5.7767
EIF1AD	0.0008195	6.59359	7.03206	6.61486	7.19551
IGF2BP3	0.0008195	7.70154	5.94227	8.38698	6.22384
ARMC7	0.0008195	3.74108	3.93918	3.72263	3.84591
MYC	0.0008195	11.8671	10.608	11.9716	11.456
TTYH3	0.0008195	4.02032	3.71897	4.07363	3.70517
SEMA7A	0.0008195	3.23153	3.51896	3.21044	3.52452
TMCC2	0.0008195	3.3388	3.19155	3.27851	3.19071
NANP	0.0008195	5.13814	5.89071	5.10358	5.90814
WWOX	0.0008195	4.22489	4.74541	3.99813	4.62046
SPON2	0.0008195	4.13573	4.90163	4.11179	4.75098
SLC12A9	0.0008195	4.57329	4.09448	4.48884	4.1091
NAP1L2	0.0008195	2.90738	3.72857	2.87941	3.13152
PRKAR2A	0.0008195	5.05439	4.3503	4.97853	4.10439
PQLC1	0.0008195	4.77951	4.45108	4.75255	4.35898
TRIM47	0.0008195	4.3543	5.28008	4.25854	5.35125
PTPRE	0.0008195	6.60043	5.04838	6.74526	5.26733
SMOX	0.0008195	3.33846	3.93572	3.3	3.64782
SCD5	0.0008195	3.49047	3.81983	3.49305	3.84587
PTGDR2	0.0008195	3.216	3.4316	3.22783	3.31085
MAST3	0.0008195	5.91125	5.17188	5.98376	5.22813
UTP11	0.0008195	7.83094	8.25474	7.80651	8.24624
SLC43A1	0.0008195	7.36581	5.40288	7.56826	5.08229
POU2F1	0.0008195	5.34111	4.73719	5.36679	4.7675
NOL4L	0.0008195	5.08828	5.68988	5.18071	5.88469
SBK1	0.0008195	4.88928	6.46581	4.54974	6.66742
ATP5E	0.0009252	11.0613	11.3828	11.0716	11.4571
CBLB	0.0009252	3.96816	3.44787	3.74643	3.36564
AKR1C3	0.0009252	4.6169	6.80454	4.0865	6.78663
HLX	0.0009252	5.65211	3.63702	4.86524	3.54537
GRAP	0.0009252	6.18896	5.26585	6.30081	5.5073
KLHL24	0.0009252	6.69689	5.64738	6.63406	5.70136
GPR160	0.0009252	7.84944	5.37285	8.07597	4.52743
CRIM1	0.0009252	3.85336	3.07217	3.57942	3.10002
ADO	0.0009252	8.26121	7.85027	8.32462	7.87494
AP5S1	0.0009252	4.32814	4.97226	4.21338	4.94602
COMMD8	0.0009252	8.07433	8.88158	8.15986	8.79664
CDADC1	0.0009252	4.07232	4.54356	3.9415	4.46024
LYSMD1	0.0009252	3.20333	3.44895	3.22109	3.41416
HOXB3	0.0009252	3.25742	3.96772	3.17542	3.99732
EPHA1	0.0009252	3.21389	3.50009	3.17978	3.48466
CYP2U1	0.0009252	3.3836	3.97885	3.31746	3.98625
HSDL2	0.0009252	6.57346	7.2212	6.59288	7.10743
DAND5	0.0009252	3.2064	3.45349	3.20327	3.38291
BOLA3	0.0009252	9.19295	9.85102	9.05947	9.9194
ATP2C1	0.0009252	6.71731	7.43178	6.63257	7.33272
HDAC4	0.0009252	3.49017	4.04078	3.51034	3.97071
AP2B1	0.0009252	7.04092	7.50057	7.01154	7.51987
CARD9	0.0009252	3.26421	3.09716	3.22856	3.09599
S100P	0.0009252	3.52576	4.6638	3.35392	3.88956
MTCL1	0.0009252	7.21021	4.97826	7.25556	4.83866
PROCA1	0.0009252	4.69405	3.94416	4.79415	3.85496
PIM2	0.0009252	4.86507	3.7864	3.876	3.44553
SRPK2	0.0009252	7.89504	8.57655	7.91354	8.59392
VAT1	0.0009252	4.67658	5.66202	4.59977	5.60224
ZDHHC18	0.0009252	4.38295	4.71251	4.36811	4.60774
TRIM35	0.0009252	4.59506	4.99738	4.53618	4.99029
WASF1	0.0009252	6.6683	5.76031	6.49863	5.97733
ZNF395	0.0009252	7.62081	6.52962	7.59591	6.48615
RBBP9	0.0009252	6.35853	7.03713	6.34939	7.10985
SLC35F3	0.0009252	2.8406	3.77318	2.79252	3.10057
TSSC4	0.0009252	5.63125	5.93776	5.60615	6.01381
TMEM109	0.0009252	5.61648	6.28146	5.62469	6.29768
TMX4	0.0009252	7.92262	7.029	7.83476	7.47424
RAD51D	0.0009252	4.38923	4.71615	4.38066	4.71386
RTL6	0.0009252	4.74407	5.83957	4.50811	5.83973
TANC2	0.0009252	4.07265	5.26692	3.79842	5.32123
PDIA6	0.0009252	10.1132	9.3383	10.1202	9.23356
VSIG10	0.0009252	4.18739	2.92024	3.87196	2.84073
FLT3	0.001043	6.66992	3.24345	7.94885	3.251
CMTR1	0.001043	6.45885	6.71117	6.35425	6.67205
FKBP4	0.001043	6.47019	7.62428	6.38951	7.71313
CEP55	0.001043	7.45029	8.16131	7.36396	8.19778
C6orf223	0.001043	3.6277	4.05599	3.60889	3.9751
LSM4	0.001043	9.30413	9.85688	9.45821	9.77912
AC016586.1	0.001043	4.16027	3.75027	4.17473	3.68872
GGCX	0.001043	4.00679	3.71514	4.00206	3.76434
IGLL5	0.001043	6.02897	3.78824	6.11366	3.63039
BCL2L1	0.001043	4.54273	4.90885	4.51192	4.85692
GADD45A	0.001043	9.08921	7.60355	8.79862	7.68762
SLC35A3	0.001043	4.55471	4.90891	4.59156	4.87917
SKP1	0.001043	6.34937	6.66586	6.38161	6.57462
MPC1	0.001043	7.25702	7.97515	6.96319	7.81213
SETX	0.001043	7.54236	6.81912	7.51543	6.91915
SPA17	0.001043	5.4874	4.42606	5.45906	4.11073
TAPT1	0.001043	6.48779	5.34225	6.6768	5.49715
PROS1	0.001043	3.78887	4.455	3.74997	4.02867
PTPRN2	0.001043	3.79923	5.34065	3.37394	4.86452
NPLOC4	0.001043	4.01486	4.33871	4.03168	4.2958
TBRG1	0.001043	5.71812	6.21687	5.71308	6.0377
ZP1	0.001043	3.47946	3.88657	3.46213	3.66135
PIK3R3	0.001043	3.95484	4.5581	3.83588	4.60885
SLC41A3	0.001043	6.45205	6.91812	6.48785	6.90507
PIWIL4	0.001043	3.10956	3.48565	2.98141	3.27422
NDRG3	0.001043	4.54853	5.1542	4.56462	5.0335
BIN2	0.001174	3.89394	6.26833	3.56596	7.27161
FAAH2	0.001174	3.56153	4.08261	3.5446	3.77997
FAM133A	0.001174	3.0046	3.38617	3.00571	3.22118
FAM177A1	0.001174	5.80165	6.37458	5.81924	6.33809
DIRAS1	0.001174	3.46809	3.24879	3.47106	3.22998
C9orf16	0.001174	5.48796	6.26264	5.53531	6.06775
LIPA	0.001174	7.83139	8.30823	7.98601	8.37414
DPP7	0.001174	7.00953	6.0283	7.12256	5.99342
CREB3L4	0.001174	6.94915	6.36165	7.03216	6.37179
TXNDC11	0.001174	7.2193	6.36331	6.90346	6.44333
TTK	0.001174	8.53556	9.39064	8.53093	9.53092
MICAL3	0.001174	3.49227	3.27234	3.4936	3.26183
ZNF823	0.001174	5.04864	5.59884	5.09249	5.66503
UPF2	0.001174	7.66369	7.19975	7.6319	7.12977
NT5M	0.001174	5.52594	6.66857	5.47893	6.82483
MYLIP	0.001174	6.2233	4.69492	6.06446	4.29802
SLC25A17	0.001174	6.02619	6.45424	6.12584	6.57966
SMIM13	0.001174	3.85928	4.17031	3.91586	4.06742
MIS18BP1	0.001174	7.68877	6.76811	7.68707	6.65841
SLK	0.001174	5.79396	6.6369	5.93842	6.70602
UNC93B1	0.001174	3.706	3.27139	3.67913	3.35288
RAB11FIP1	0.001174	3.79213	4.27102	3.73442	4.10229
NFKB1	0.001174	9.4216	7.53811	9.54552	8.32191
MICAL2	0.001174	3.60692	3.95155	3.59666	3.82439
NEK7	0.001174	7.00157	8.01186	7.04978	7.68229
TCEAL9	0.001174	3.97364	6.27967	3.37229	7.03328
PBX4	0.001174	4.31755	4.92206	4.24052	4.7912
NT5E	0.001174	3.87581	3.12993	3.61227	3.08615
MEX3C	0.001174	7.03371	6.54166	7.08437	6.53788
SAP130	0.001174	6.61884	7.06226	6.52094	7.0693
RHOH	0.001174	7.78623	8.94371	8.17763	9.48261
WDR66	0.001174	3.33871	3.11627	3.29315	3.09367
SERAC1	0.001174	3.59964	4.13212	3.51622	4.05298
TDRKH	0.001174	3.71685	4.35614	3.70923	4.37335
PCMT1	0.001174	9.23926	9.68316	9.28363	9.57439
HINT1P1	0.00132	12.5686	12.8472	12.5514	12.8911
LRFN4	0.00132	4.65142	5.14999	4.62343	5.19485
GPR174	0.00132	3.53934	4.80079	3.50755	4.71231
CORO2B	0.00132	3.44285	3.09264	3.22675	3.10798
AC114876.1	0.00132	7.93594	8.48953	7.80252	8.44133
CHST11	0.00132	6.91454	8.31811	7.35288	8.54392
HLA_DPB2	0.00132	3.17377	2.98665	3.13739	2.87464
DLG5	0.00132	3.52204	3.78075	3.48745	3.76147
CTGF	0.00132	5.13588	3.04439	3.62101	3.07263
CXXC5	0.00132	8.93858	7.2769	8.91803	7.49
AC074389.1	0.00132	3.31382	3.18336	3.30979	3.1679
FGFR1	0.00132	4.58731	5.91916	4.54896	6.22522
FAM45A	0.00132	6.28347	7.21205	6.39056	7.0834
LTK	0.00132	3.61145	3.06875	3.27378	3.04031
GAB3	0.00132	5.36191	4.24962	5.25737	4.32003
GLTP	0.00132	7.19175	7.59186	7.27823	7.5301
HYOU1	0.00132	3.78132	4.01723	3.67719	4.02155
C14orf166	0.00132	11.0472	11.2866	11.0636	11.3073
NARFL	0.00132	4.61416	4.08883	4.53849	3.97021
PYCR1	0.00132	5.74766	4.69027	5.61031	4.44467
TLE3	0.00132	4.71411	5.92384	4.89033	6.05765
PURB	0.00132	4.70615	5.15948	4.79408	5.06359
TFAP2E	0.00132	3.38298	4.0389	3.32996	3.97308
TSC1	0.00132	4.85418	4.55316	4.79084	4.54088
PRKAR1B	0.00132	3.73425	4.46329	3.63837	4.14234
MOAP1	0.00132	8.45318	8.86037	8.39245	8.83519
ZNF787	0.00132	5.40711	4.90817	5.42894	4.79427
PTPN4	0.00132	7.41298	8.00597	7.49096	7.99102
TSPAN3	0.00132	9.72223	9.32304	9.84285	9.38672
RHOT1	0.00132	8.75287	9.12465	8.77506	9.15306
TMEM8B	0.00132	4.41884	4.67	4.40122	4.63643
STRA6	0.00132	3.18385	3.85779	3.18941	3.56221
TERT	0.00132	4.64932	3.87573	4.37566	3.65733
TNFRSF13C	0.00132	3.45676	3.10813	3.39823	3.09092
CFAP73	0.001481	4.45937	3.4866	4.4024	3.5038
BCL3	0.001481	3.36492	3.22055	3.34341	3.23109
HTATSF1	0.001481	6.9824	7.6281	7.02592	7.52824
CAMSAP1	0.001481	6.47672	6.10979	6.48083	6.06546
IFT43	0.001481	5.45616	6.3602	5.31545	6.4285
HIF1AN	0.001481	4.96499	5.374	5.00071	5.4283
FAM71E1	0.001481	3.46802	3.82857	3.51236	3.74836
CDK2AP2	0.001481	7.59733	8.41877	7.64778	8.38494
ELP5	0.001481	6.17111	6.72208	6.16879	6.78501
AMBRA1	0.001481	3.6213	3.81603	3.64478	3.82757
ATP2B4	0.001481	4.07551	4.50302	3.86821	4.53243
CCDC34	0.001481	6.58932	7.17422	6.62732	7.276
CLGN	0.001481	3.65109	5.7145	3.21044	6.79461
AL355987.1	0.001481	4.46788	2.9759	3.52571	3.003
ASMTL_AS1	0.001481	3.74992	3.58239	3.78025	3.5655
NMU	0.001481	2.65339	3.20203	2.67223	2.9224
TRIM22	0.001481	6.75655	5.07379	6.74947	5.28113
RHOU	0.001481	3.35982	5.25744	2.9327	4.49574
PHF7	0.001481	3.83108	4.28802	3.8858	4.21786
RIMKLB	0.001481	6.0948	4.90753	6.10356	5.12547
POP4	0.001481	4.97195	5.36233	4.96543	5.33853
SCN1B	0.001481	3.45528	3.27275	3.42593	3.25326
PPA2	0.001481	5.03024	5.43885	5.07365	5.395
RDX	0.001481	4.0059	3.83741	4.00097	3.80217
ZCCHC18	0.001481	5.54863	4.19121	5.85061	3.85006
PDCD10	0.001481	8.83583	9.29003	8.79724	9.35513
SAV1	0.001481	5.72703	4.94991	5.74906	4.93743
SLC23A1	0.001481	3.51723	3.17904	3.4524	3.1477
RIN3	0.001481	3.20022	3.49985	3.16128	3.32166
MBOAT1	0.001481	3.36713	3.59271	3.22301	3.57106
SAMHD1	0.001481	4.63516	3.79299	4.41181	3.55934
RNF150	0.001481	3.23261	3.6441	3.20359	3.50214
FCGBP	0.00166	4.17934	5.26378	3.73258	5.4892
CD96	0.00166	4.40037	6.44358	3.33252	7.2901
GNAI3	0.00166	8.1744	8.51098	8.21847	8.59194
ANKEF1	0.00166	3.53015	4.26108	3.48529	4.21842
DPM1	0.00166	9.67632	10.0116	9.63553	10.0161
LSM2	0.00166	9.96477	10.3825	9.97192	10.4116
KAZALD1	0.00166	3.64627	3.12249	3.48887	3.05924
FAM69B	0.00166	5.40794	4.21321	5.78109	4.15039
IGFBP2	0.00166	5.85244	8.48337	5.87059	9.08276
GPSM1	0.00166	4.33568	3.70932	4.48733	3.75354
FAM118B	0.00166	6.61546	7.18743	6.4105	7.25573
FLOT2	0.00166	4.5115	4.06519	4.39619	3.99491
BLOC1S2	0.00166	7.467	7.86986	7.57256	7.86721
KMO	0.00166	3.68903	3.03021	3.24226	3.02185
ACAP1	0.00166	6.23516	7.31991	6.52029	7.36007
ARSB	0.00166	3.16504	3.402	3.1413	3.43743
FBXW11	0.00166	7.87593	7.46298	7.97499	7.45682
AK1	0.00166	4.67073	4.18816	4.41963	4.18219
TFDP2	0.00166	7.68268	9.36279	7.77816	9.68151
SPCS1	0.00166	9.88643	10.3759	9.93695	10.2596
MCTP2	0.00166	4.08084	3.50085	3.89298	3.34096
MOCS2	0.00166	5.24194	6.21175	5.46456	6.29886
NLRC5	0.00166	6.62018	5.13237	6.57274	4.80555
TMIGD2	0.00166	4.31378	5.52694	4.21457	5.17334
MFGE8	0.00166	3.81148	4.20198	3.81256	4.11381
MANEAL	0.00166	5.32688	4.45009	5.46783	4.49651
OBSCN	0.00166	3.26014	3.45942	3.22324	3.4266
RAB9A	0.00166	8.23933	7.82049	8.2051	7.49766
RING1	0.00166	6.3504	6.72137	6.35103	6.77289
PNMA2	0.00166	3.64249	5.05504	3.10511	5.49397
TMEM26	0.00166	3.05558	3.32808	3.02245	3.19848
PPP2R5D	0.00166	5.09034	5.59658	5.00174	5.45083
PRDM2	0.00166	6.49876	6.00407	6.40381	5.89298
TTLL8	0.00166	3.15173	3.30426	3.12012	3.31292
STK17A	0.00166	6.66825	7.7791	6.62569	7.84282
STARD4	0.00166	4.12157	4.61657	4.05429	4.54267
ZNF830	0.00166	6.88803	7.23707	6.91073	7.20125
MLX	0.00166	7.08584	7.4213	7.04964	7.41859
RORB	0.00166	3.7686	5.32922	3.14394	5.69948
FAM193B	0.001859	7.51513	6.98337	7.62237	6.9023
ERC1	0.001859	4.18072	3.72589	4.0348	3.66853
CD40LG	0.001859	3.19059	3.50324	3.18624	3.32309
DHX8	0.001859	5.90538	6.2545	5.93784	6.29273
IMPAD1	0.001859	5.95653	6.30931	5.96611	6.28134
BCAT1	0.001859	6.7709	5.52191	6.77556	5.31308
ATG13	0.001859	4.61373	4.97001	4.52998	5.04299
FZD3	0.001859	4.03036	3.41439	3.89359	3.28605
CITED2	0.001859	5.04965	4.50061	5.17192	4.50816
CELSR2	0.001859	4.62255	3.89724	4.65053	3.8486
CELF5	0.001859	3.28789	4.5354	3.01339	4.34515
FBXL4	0.001859	5.51213	4.97009	5.44378	4.99967
KCNC4	0.001859	3.4353	3.59764	3.45743	3.57637
BLK	0.001859	6.62074	4.48368	6.73282	3.35304
CHST2	0.001859	4.75401	6.40084	3.71457	5.67021
GPD2	0.001859	4.92706	3.68792	5.1641	3.17218
INSIG1	0.001859	9.08841	10.0689	9.27535	10.2818
GTSF1L	0.001859	3.25536	2.92807	3.17935	2.91071
GCLC	0.001859	5.34525	5.954	5.30392	5.87238
EHBP1L1	0.001859	6.38739	5.50991	6.35041	5.40785
CHRNA5	0.001859	4.08033	4.65058	4.04486	4.63268
F8	0.001859	4.2523	4.77163	4.07893	4.70167
ZNF653	0.001859	3.89789	4.22539	3.90573	4.21718
PTPN22	0.001859	4.45986	5.7081	3.90884	5.87476
PCNX2	0.001859	3.3117	3.79253	3.22432	3.84691
STN1	0.001859	6.9933	7.64358	7.02071	7.64655
NUP54	0.001859	9.05821	9.42977	9.13193	9.45302
STAU2	0.001859	5.46387	5.89715	5.4543	5.83003
RABEP2	0.001859	4.20896	3.9701	4.24224	3.99374
TLR7	0.001859	4.11498	3.0666	3.26371	3.03364
USMG5	0.001859	9.38737	9.82103	9.38922	9.8796
MDH1	0.001859	10.6677	10.928	10.6903	10.9095
MAPKBP1	0.001859	3.77524	3.4321	3.77444	3.38583
MLLT11	0.001859	7.39754	8.43693	7.46969	8.81545
ZNF683	0.001859	3.21094	3.51726	3.15052	3.35865
PSMD11	0.001859	8.97928	9.43543	9.0703	9.45849
TPX2	0.001859	8.87864	9.3892	8.98022	9.4281
SMNDC1	0.001859	8.78293	9.04281	8.79373	8.99662
PCYT1B	0.001859	2.996	3.25141	2.95404	3.07412
EVI2A	0.002077	6.79144	5.73477	6.78683	5.91317
ACP2	0.002077	4.09329	4.3527	4.04006	4.3621
DHX32	0.002077	5.79119	4.14482	5.98811	3.74354
AC245452.1	0.002077	3.88325	3.56116	3.75196	3.57019
CLPP	0.002077	9.13721	9.53668	9.2595	9.53132
E2F8	0.002077	6.47953	5.64043	6.518	5.73548
FUOM	0.002077	5.34743	4.26079	5.56586	4.03241
FAM32A	0.002077	8.76598	9.0951	8.69349	9.15629
BEX3	0.002077	4.34944	9.41278	3.65889	11.7401
DNASE1L3	0.002077	3.02883	2.68272	2.83769	2.65993
LSM1	0.002077	8.10759	8.6001	8.1519	8.63015
DDX50	0.002077	8.3579	8.66591	8.35053	8.70774
KLHDC7A	0.002077	3.26442	3.08452	3.18297	3.05362
ABHD15	0.002077	6.32676	5.27048	6.22911	5.18839
FAM76A	0.002077	3.99625	4.33424	4.01029	4.29525
HIVEP2	0.002077	5.94714	5.01027	5.96868	5.26601
CEP152	0.002077	8.75291	8.21799	8.80127	8.11229
ARMC8	0.002077	5.46309	5.82641	5.4967	5.84189
ADCY6	0.002077	4.29978	3.81943	4.06164	3.8501
CLSTN3	0.002077	3.90756	4.20285	3.87926	4.24381
BUD13	0.002077	7.67321	8.04128	7.70676	8.00108
IPP	0.002077	3.85093	4.61843	3.69678	4.49826
EIF2A	0.002077	10.7955	10.3528	10.8483	10.2623
ADGRB2	0.002077	3.54677	3.8932	3.47397	3.87112
CALR	0.002077	3.87153	4.50497	3.78843	4.78199
C19orf38	0.002077	4.32497	3.6043	4.12813	3.53152
CIDEB	0.002077	4.43036	3.56997	4.29505	3.2825
DDX54	0.002077	5.75358	5.31126	5.77638	5.24161
C3orf52	0.002077	3.81967	3.33655	3.53996	3.27777
RNF149	0.002077	7.74249	8.68315	8.139	8.61625
SLC30A5	0.002077	5.75173	5.96757	5.75413	5.99245
USP39	0.002077	9.17714	9.60096	9.09183	9.57603
SNX17	0.002077	8.01734	8.48085	8.00433	8.44719
ZNF71	0.002077	5.02899	5.48234	5.04507	5.58715
SEL1L3	0.002077	7.00879	4.69632	6.65822	3.63934
TASP1	0.002077	5.03876	5.97562	5.02214	5.74298
SMG9	0.002077	5.8109	6.22065	5.68749	6.19175
SETD7	0.002077	4.46045	4.02247	4.38359	3.95259
PAQR4	0.002077	4.43346	4.16312	4.46319	4.14897
TNRC6A	0.002077	7.13114	6.81659	7.15222	6.83774
'SEPT1	0.002077	5.0597	6.18137	5.11818	6.14494
TMEM106C	0.002077	9.24524	9.82951	9.33338	9.86425
POLB	0.002077	8.41423	8.92903	8.45217	8.97261
SLC15A4	0.002077	8.36475	7.37603	8.19101	7.80191
PSMB3	0.002077	10.5919	11.0255	10.5582	11.1541
ZFPM2	0.002077	2.96633	3.23201	3.00303	3.13308
RTN4IP1	0.002077	5.12568	4.4126	4.89626	4.50828
MSRA	0.002077	4.69996	3.70331	4.47046	3.48581
TCAIM	0.002077	4.53254	5.13491	4.54317	5.16462
PALLD	0.002077	4.27249	6.38081	3.37327	7.08466
OR2AT4	0.002077	3.24806	3.42233	3.25435	3.45764
SCN4A	0.002077	3.19629	3.01022	3.11753	2.97621
RAB13	0.002077	6.95265	5.32923	7.57079	5.05991
CCR8	0.002319	3.20868	4.31722	3.20181	3.65476
GMIP	0.002319	4.34632	3.97339	4.28467	4.02297
GNAI2	0.002319	7.41184	8.03228	7.41392	8.01579
EMP3	0.002319	5.53319	7.18063	5.63957	7.19934
DYRK3	0.002319	5.17497	4.03673	5.13112	3.97336
C17orf75	0.002319	7.58239	8.12215	7.69543	8.06954
GTPBP8	0.002319	7.41057	7.77474	7.45169	7.81122
INO80	0.002319	5.87053	5.38859	5.74111	5.44297
EIF3E	0.002319	11.5881	11.1265	11.5349	11.1161
CEP85	0.002319	4.3633	4.76066	4.3755	4.68589
FGFR3	0.002319	4.35258	4.83278	4.35081	4.77088
ATRAID	0.002319	9.07001	9.4807	9.05067	9.53652
CASP9	0.002319	5.52593	5.0747	5.36505	5.07122
ARFGAP3	0.002319	7.29215	8.10206	7.38009	8.15277
CDIP1	0.002319	4.67143	4.01882	4.59469	3.85086
DGKA	0.002319	4.13286	4.74	4.03094	4.56502
FLII	0.002319	7.47149	7.94916	7.59604	7.99542
HPF1	0.002319	7.90347	9.12374	8.69083	9.21698
EEPD1	0.002319	3.59169	3.99551	3.37638	3.73015
LCT	0.002319	3.20939	4.46673	3.03384	4.07093
AK5	0.002319	2.99722	2.85743	2.9638	2.8369
C4orf32	0.002319	6.51347	4.74704	7.13237	4.68633
BCAS3	0.002319	4.4551	5.05021	4.25141	4.96986
XKR6	0.002319	3.31549	3.09493	3.2735	3.07815
MRFAP1L1	0.002319	7.91603	8.33469	7.95839	8.38874
RPN2	0.002319	10.4838	10.8933	10.4846	10.9274
MID1IP1	0.002319	7.49019	6.74634	7.50576	6.5781
ZC3H7A	0.002319	7.23583	6.74686	7.19943	6.79268
PBRM1	0.002319	5.9458	6.37428	5.89528	6.45523
MAST4	0.002319	3.39694	3.74714	3.34717	3.52585
PSMF1	0.002319	5.9531	6.34779	5.93137	6.38167
SCN4B	0.002319	3.42624	3.6002	3.35981	3.5435
SLC38A9	0.002319	6.91254	7.37562	6.92103	7.34813
SLC9A7	0.002319	3.6303	3.16889	3.55392	3.11154
MRPL58	0.002319	8.23129	8.6709	8.25633	8.68555
RBCK1	0.002319	4.65371	5.35622	4.51008	5.00783
SALL2	0.002319	3.56115	3.89951	3.47928	3.91093
MIS18A	0.002319	7.24458	7.56503	7.21528	7.62574
VCP	0.002319	8.42943	8.87748	8.54187	8.97308
RNF14	0.002319	6.63185	7.01038	6.72219	7.04984
STX11	0.002319	3.42835	3.85332	3.36402	3.59242
WDR59	0.002319	5.53224	5.88141	5.44144	5.76854
PIGT	0.002319	5.98798	6.38224	5.982	6.24383
MIOS	0.002319	8.85124	8.261	8.91668	8.40239
ZFP36L1	0.002319	4.04464	3.6198	4.01185	3.51856
RGS12	0.002319	3.64291	3.37129	3.58841	3.36253
USP34	0.002319	7.31135	6.53653	7.03479	6.37965
RAG2	0.002319	7.36279	4.69874	7.91751	3.71422
SLC35G2	0.002319	4.50231	6.03583	3.78913	6.71762
MGAT4A	0.002319	3.87712	5.04869	3.51765	5.0636
SF3B5	0.002319	10.2038	10.519	10.119	10.5301
MYO1A	0.002319	3.38091	3.63104	3.35352	3.53038
MDK	0.002319	7.06335	4.82251	7.91029	4.55632
DOHH	0.002585	4.14293	4.63426	4.07568	4.66742
HECA	0.002585	8.2156	7.62539	8.13449	7.59833
CRNDE	0.002585	9.17261	10.1874	9.65505	10.3862
DENND4A	0.002585	4.57591	4.0663	4.46143	3.86203
DEPDC5	0.002585	4.45751	4.00678	4.34495	3.9718
ARL9	0.002585	4.6365	3.47114	4.03069	3.45289
KXD1	0.002585	8.09845	8.37757	8.13041	8.3704
ARID1B	0.002585	7.80752	7.27079	7.89263	7.15124
CETP	0.002585	3.49042	3.05417	3.11345	2.91889
ADD1	0.002585	5.3576	5.74376	5.43206	5.77533
CD226	0.002585	2.97838	3.55389	2.97936	3.12586
KHNYN	0.002585	6.4604	6.06431	6.4675	6.23141
CROT	0.002585	3.66161	3.99901	3.41429	3.90056
ARHGEF12	0.002585	3.81608	3.43554	3.77629	3.25407
GIMAP2	0.002585	7.3816	9.02393	8.05783	9.41575
GRHL1	0.002585	3.46141	3.7798	3.24016	3.68963
ATP6V0A4	0.002585	2.91394	3.79763	2.89044	3.1307
LRRK2	0.002585	3.39811	3.04926	3.15664	3.06261
COL4A3BP	0.002585	5.88216	6.41683	5.91758	6.33201
CDC42	0.002585	4.55286	4.88169	4.51263	4.80535
SGMS1	0.002585	5.26564	4.73835	5.39585	4.26712
NAPSB	0.002585	3.47539	3.13127	3.26245	3.14053
NOL4	0.002585	3.89522	3.51802	3.24375	3.07518
RASA2	0.002585	4.07129	4.75787	4.19043	4.62503
PIP4K2C	0.002585	5.30379	6.77243	5.27834	6.68544
RNF144B	0.002585	4.26271	3.45511	3.79897	3.38588
NFKBIE	0.002585	6.37871	6.06	6.38149	5.77379
S100A5	0.002585	3.13646	3.29787	3.13953	3.31248
SLC46A3	0.002585	5.31898	6.4098	5.29697	6.5731
XYLT1	0.002585	7.67871	5.47278	7.93164	5.98912
TMEM38B	0.002585	6.29865	7.2229	6.57758	7.27259
PKD2	0.002585	5.16966	4.08389	5.05321	4.04507
PRKX	0.002585	6.5942	5.73642	6.7245	5.68268
NAP1L3	0.002585	2.9997	4.03191	2.97421	3.87978
NCOA3	0.002585	5.99881	5.19265	5.64326	5.19374
TESC	0.002585	6.02428	8.38672	6.01319	8.90275
RAB23	0.002585	3.69851	4.23473	3.64253	4.13118
PYCARD	0.002585	7.35661	5.52442	7.79492	6.03073
SIRPG	0.002585	3.27704	4.02603	3.3031	3.49597
RAB3GAP1	0.002585	6.71828	6.03702	6.66721	6.00378
PXK	0.002585	6.69876	5.6902	6.77424	5.58982
MINPP1	0.002585	7.22547	8.53253	7.53436	8.69353
PGK1	0.002585	8.85463	9.57098	8.94631	9.67317
CNOT11	0.002878	8.55891	8.87499	8.62305	8.80954
GDAP2	0.002878	5.53195	6.18231	5.51699	6.11556
BRMS1L	0.002878	4.48834	4.75716	4.38054	4.66363
C1orf174	0.002878	6.41892	6.97448	6.42301	6.84556
KLHL36	0.002878	5.16703	4.20417	5.1961	3.85813
HIST1H2BE	0.002878	2.90398	3.07872	2.9112	3.02843
C14orf80	0.002878	5.03017	5.4838	4.99235	5.41498
CEP78	0.002878	4.77424	5.08609	4.7578	5.01948
INPP5B	0.002878	4.54656	4.31924	4.47984	4.21292
FAS	0.002878	4.54	5.89701	4.11496	6.10065
FECH	0.002878	4.91158	5.55635	4.95494	5.51228
IDH3A	0.002878	7.25638	7.99121	7.16852	7.9748
IRF2BP2	0.002878	8.99908	8.25075	9.22166	8.13973
HLF	0.002878	3.38458	3.3202	3.18151	3.33874
LACC1	0.002878	3.14133	2.82129	2.97564	2.76265
FRMD6	0.002878	3.10556	3.72632	3.03353	3.41657
CYP2J2	0.002878	3.03244	3.53766	3.05545	3.34283
ADPGK	0.002878	7.66047	7.32678	7.67889	7.32765
CFAP97	0.002878	6.6302	6.14236	6.71586	6.12887
BRWD1	0.002878	5.36182	4.87702	5.12092	4.80922
BECN1	0.002878	8.37775	8.70324	8.45028	8.62487
FYN	0.002878	6.84919	7.93233	7.17144	8.03302
HK1	0.002878	6.00058	7.00343	6.09724	7.00354
ARX	0.002878	3.96842	3.10413	3.14763	3.02182
NME9	0.002878	2.98936	3.0568	2.98655	3.07651
PINK1	0.002878	4.72717	5.78978	4.54632	5.55778
PIGA	0.002878	3.61711	3.71954	3.57981	3.70129
MREG	0.002878	5.8306	7.26967	6.19269	7.26971
PSMC3	0.002878	10.4108	10.8409	10.5345	10.8445
NCKAP1	0.002878	3.87711	5.77625	3.66843	6.15852
TPST2	0.002878	7.33725	6.22783	7.0959	5.99946
ZBTB21	0.002878	5.03564	5.75845	5.01212	5.59713
SRA1	0.002878	7.07254	7.85049	7.09271	7.74048
NELFE	0.002878	8.99025	9.48337	9.01115	9.66167
NRP2	0.002878	3.39683	3.23188	3.3208	3.22411
QSOX2	0.002878	7.75828	6.81147	7.73853	6.85329
ZNF32	0.002878	6.59473	7.93987	7.04378	8.21387
RNF168	0.002878	3.31618	3.76758	3.26347	3.51455
PRKAG1	0.002878	7.06902	7.70227	7.03735	7.8474
TLE1	0.002878	8.01157	6.32936	8.59895	5.95844
TUBG2	0.002878	5.09858	6.43432	5.5266	6.8198
TMEM185B	0.002878	5.68446	6.36791	5.92614	6.43121
TMX1	0.002878	7.30673	7.56635	7.27202	7.62721
SPINT1	0.002878	3.64338	3.36922	3.4657	3.33117
TFAP4	0.002878	3.46236	3.30429	3.43244	3.25893
ZEB1	0.002878	6.06346	7.35503	6.20475	7.40947
PSD4	0.002878	4.43832	4.93437	4.3577	5.1034
DPP3	0.0032	7.59778	8.38701	7.71334	8.35415
C11orf49	0.0032	4.85758	5.27604	4.86732	5.32645
DUSP15	0.0032	3.44288	3.23011	3.47237	3.20859
LRRC14B	0.0032	4.00846	3.27806	3.84932	3.31957
GMFB	0.0032	5.79134	6.16074	5.79539	6.10223
CDC25B	0.0032	5.56958	6.0617	5.24953	6.04198
KIRREL2	0.0032	3.15497	3.39894	3.11273	3.42666
EIF2S3	0.0032	10.2866	9.61874	10.3095	9.47855
AATF	0.0032	8.47148	8.92491	8.55183	8.88578
C11orf80	0.0032	5.45	6.14284	5.25871	6.08981
H2AFZ	0.0032	12.4622	12.6697	12.4839	12.7114
EEF2	0.0032	12.6115	12.2849	12.653	12.1923
KLHL20	0.0032	5.68925	5.37217	5.72132	5.39802
GGA1	0.0032	5.29322	4.74843	5.21591	4.74686
KLHL14	0.0032	3.58871	3.1006	3.4603	3.07803
CCAR2	0.0032	6.57964	7.04745	6.65669	7.01497
CEP68	0.0032	6.73183	5.89965	6.70845	5.84694
ARFGAP2	0.0032	5.90368	5.61284	5.88881	5.67229
ITGA6	0.0032	3.9947	5.54402	3.21067	6.08589
COG1	0.0032	8.06805	8.47654	8.06217	8.33458
HERC6	0.0032	3.5949	4.21085	3.41371	4.02229
ASS1	0.0032	9.40481	6.8011	10.1458	5.92131
GPS1	0.0032	6.48051	6.99535	6.42347	6.98013
CD1E	0.0032	3.09724	4.81269	3.06545	4.03779
B3GNT8	0.0032	3.08875	3.2177	3.03877	3.20165
CAPG	0.0032	5.74468	7.97105	5.4168	8.08731
CAPZB	0.0032	7.94227	8.49939	7.91438	8.42341
CBR1	0.0032	5.75221	4.84093	5.73716	4.62624
DPYD	0.0032	4.04457	4.80193	3.89873	4.99128
KIAA1551	0.0032	5.24562	6.17705	5.20143	6.24036
FAM104B	0.0032	5.44933	5.95085	5.4562	6.07497
SLC38A6	0.0032	4.09328	4.6029	4.11369	4.65642
SART1	0.0032	5.3855	5.68231	5.31264	5.60262
WDR41	0.0032	8.12251	7.33297	8.02582	7.2398
STK25	0.0032	6.06021	5.71596	6.09384	5.83866
RALY	0.0032	8.19375	8.63919	8.23144	8.59418
RAB39B	0.0032	4.5965	5.63905	4.68248	5.70238
NDUFS5	0.0032	9.94219	10.6706	10.2018	10.6305
TPRKB	0.0032	7.42596	7.79549	7.47789	7.94297
USP13	0.0032	8.05106	7.51811	8.04215	7.42512
RAB34	0.0032	5.87598	3.72246	6.37237	3.36013
PPP1R14A	0.0032	3.59976	3.15796	3.39236	3.16187
TIMM17B	0.0032	7.21377	7.56937	7.20343	7.58041
SNRPC	0.0032	10.2276	10.622	10.2835	10.638
PIK3IP1	0.0032	4.11727	3.7072	3.88687	3.6268
PRPF6	0.0032	5.78301	6.22947	5.80231	6.23198
TRIM55	0.0032	3.4184	3.14884	3.23152	3.16566
OXNAD1	0.0032	4.88764	5.37144	4.94879	5.2793
NOA1	0.0032	9.87979	9.42318	9.91022	9.50464
NDUFA3	0.0032	9.9076	10.3385	10.0215	10.4284
OPRL1	0.0032	4.098	3.65267	4.09853	3.55526
SACM1L	0.0032	6.22084	6.85042	6.10389	6.83501
MFSD14B	0.0032	6.18787	6.55785	6.22806	6.612
STARD9	0.0032	5.55798	4.77883	5.61592	4.70504
MTMR6	0.0032	4.73593	5.26491	4.57167	5.30201
SOAT2	0.0032	3.03636	3.89535	3.00026	3.1982
SENP8	0.0032	3.8082	4.11105	3.82727	3.98989
PHYHD1	0.0032	4.35062	3.26537	4.44916	3.22514
LTBP3	0.003553	4.29203	3.82203	4.19335	3.90275
LIN28B	0.003553	3.10752	4.51174	3.03034	4.27352
C14orf39	0.003553	3.0088	3.37363	3.0174	3.16111
CASP1	0.003553	4.617	3.68108	4.4985	3.31296
B3GLCT	0.003553	3.96532	4.5937	3.93341	4.36679
IGFBP4	0.003553	3.45423	3.24947	3.35817	3.24256
GLMN	0.003553	7.48633	7.98535	7.39251	8.11806
AIFM1	0.003553	7.96606	8.48139	7.90709	8.5364
GALNT1	0.003553	8.77158	7.45694	8.81668	7.99785
HSD17B8	0.003553	6.50831	7.68057	6.52491	7.79444
CNIH3	0.003553	3.57353	4.27345	3.54678	3.88657
ASB9	0.003553	3.48308	4.39334	3.50889	3.75563
CIB1	0.003553	9.39756	9.98726	9.41823	10.054
EMC9	0.003553	6.6703	7.15439	6.64305	7.20212
DOCK2	0.003553	5.71807	6.48683	5.89335	6.518
BRAF	0.003553	4.75234	4.18721	4.66668	4.03287
LEPR	0.003553	3.24055	3.48695	3.20855	3.43726
ARL13B	0.003553	4.1546	4.5996	4.01804	4.62989
LRRC47	0.003553	9.51351	9.9131	9.44117	9.85828
AOC3	0.003553	3.2712	3.52908	3.23941	3.49587
CD99	0.003553	8.50488	9.75841	8.66247	9.87332
HACE1	0.003553	5.91134	6.63868	6.04363	6.59774
DLGAP5	0.003553	9.10341	9.58172	9.08516	9.65376
IMPDH1	0.003553	6.26489	5.605	6.17561	5.72354
ANK1	0.003553	3.63206	2.98116	3.34216	2.94875
IGLL1	0.003553	9.98699	6.4112	11.1415	5.0495
TMEM170B	0.003553	5.02885	6.13453	4.97827	6.484
SETDB1	0.003553	6.23489	5.77577	6.14913	5.68106
TMEM134	0.003553	6.45429	6.88397	6.56877	6.81983
TNFRSF8	0.003553	3.27378	4.04364	3.24669	3.51703
WDR19	0.003553	4.90798	4.44999	4.80889	4.49429
ZNF175	0.003553	4.26804	4.82567	4.25165	4.81904
RPAIN	0.003553	7.66959	8.14462	7.65456	8.18221
RASA1	0.003553	7.16928	6.63366	7.14525	6.55342
PPP2R5C	0.003553	8.37078	7.7451	8.34674	7.74718
MAP2K2	0.003553	7.32428	7.74923	7.29077	7.64776
WRB	0.003553	3.74997	3.97377	3.67773	3.97257
ZNF449	0.003553	4.78907	5.196	4.84449	5.21805
TPP2	0.003553	8.30476	7.76799	8.5496	7.80989
TIMM23	0.003553	9.65293	10.1133	9.74074	10.1796
TATDN2	0.003553	6.74298	7.25186	6.68425	7.39704
RSAD2	0.003553	3.21467	3.81849	3.17789	3.62914
WHAMM	0.003553	6.83029	6.33302	6.58475	6.31485
TSPAN33	0.003553	7.07312	6.05503	7.23088	6.02146
THAP1	0.003553	6.39388	6.84144	6.42477	6.81649
SLC39A13	0.003553	5.01807	5.40585	4.90262	5.39939
RTKN	0.003553	3.29781	3.15704	3.31695	3.14759
SLC7A7	0.003553	4.54566	3.627	4.2787	3.37657
NDUFA4L2	0.003553	3.23394	3.061	3.20149	3.03405
FAM217B	0.00394	5.06574	5.76971	4.97629	5.84162
LINC00847	0.00394	7.00798	5.81625	7.12253	6.28463
ERI1	0.00394	7.04078	7.58076	7.08164	7.57471
FBXW2	0.00394	6.24031	6.7077	6.28388	6.75993
LMBR1	0.00394	5.5449	6.08063	5.35656	6.13453
INPP5K	0.00394	5.07659	5.62669	5.05355	5.54211
GPBP1	0.00394	7.45237	7.2293	7.47273	7.18219
LSM14A	0.00394	9.31333	9.05735	9.24846	9.1098
CTNNBIP1	0.00394	4.53422	5.02335	4.51498	4.8248
COPS4	0.00394	9.11996	9.54354	9.1671	9.60772
ABHD5	0.00394	4.29561	5.17548	4.31881	5.21181
IFIT1	0.00394	4.45884	5.2321	4.14044	4.89314
CCNK	0.00394	8.76274	9.18732	8.70206	9.18487
C6orf136	0.00394	7.39791	7.7863	7.36918	7.67667
LMF1	0.00394	3.7936	3.54359	3.69947	3.54007
HINT1	0.00394	10.9559	11.2556	10.9687	11.2789
HDGF	0.00394	8.74472	8.19634	8.73156	8.06148
ADH5	0.00394	8.22881	8.70958	8.24479	8.84418
FSD1	0.00394	3.76633	4.34127	3.7507	4.54962
HPS5	0.00394	6.65767	6.41765	6.67618	6.40198
BCS1L	0.00394	7.57566	7.16067	7.72654	7.18737
GEMIN6	0.00394	6.81051	7.4344	6.95455	7.34065
IRF2BPL	0.00394	7.89432	8.63761	7.95584	8.7556
ARTN	0.00394	3.66353	3.24054	3.38182	3.19861
FOLR1	0.00394	3.81643	3.67207	3.76829	3.65511
DHCR24	0.00394	3.53551	3.81112	3.48012	3.66806
NUP35	0.00394	6.82405	7.2673	6.74312	7.34439
NTNG1	0.00394	3.26723	3.13588	3.24377	3.11764
PUS3	0.00394	7.72539	8.11311	7.67891	8.21936
SLX4IP	0.00394	5.8794	6.51196	6.20182	6.46121
WDR92	0.00394	4.80089	4.47083	4.77002	4.53224
PXMP4	0.00394	4.25945	5.22557	4.03816	5.24141
TTC39C	0.00394	4.65375	3.98757	4.34879	3.77364
NT5C2	0.00394	6.11766	5.67107	6.02371	5.70422
PTPDC1	0.00394	4.49045	5.14049	4.50638	5.26618
STMN3	0.00394	6.64554	8.01493	6.68753	8.37005
PSMA5	0.00394	10.5589	10.9265	10.4408	10.9958
SLC39A3	0.00394	3.89597	4.43671	3.87396	4.25655
RNF123	0.00394	4.62972	4.97447	4.59577	4.94007
SPOCK1	0.00394	3.29469	4.23868	3.24178	3.66553
NPRL2	0.00394	7.95219	8.30091	7.91233	8.28979
ZNF771	0.00394	4.31513	3.76221	4.11687	3.76438
TRIM62	0.00394	3.45565	3.60919	3.44314	3.55038
ZFP1	0.00394	5.08487	5.54299	5.07855	5.63204
MRPL18	0.00394	9.10798	9.43542	9.13317	9.51515
SIGLEC6	0.00394	2.82116	3.14593	2.79424	2.92691
TOMM40L	0.00394	3.65316	4.00915	3.5258	3.96007
NEK9	0.00394	7.03907	6.74331	7.15478	6.77309
SETD3	0.00394	4.29431	4.54693	4.24187	4.5032
PPIH	0.00394	6.87264	7.27451	6.7565	7.51334
SYCP3	0.00394	2.89326	2.76701	2.91238	2.77407
TUBG1	0.00394	9.25527	9.83456	9.38979	9.81522
STAP1	0.00394	6.21065	3.68702	6.3222	3.22695
MAF	0.00394	3.33924	3.74511	3.32502	3.41761
PITPNM1	0.00394	4.86759	5.30872	4.71191	5.20735
TNFAIP8L2	0.00394	5.70796	4.5254	5.93516	4.08804
RAB27B	0.00394	3.08668	3.34165	3.10279	3.30088
OSBPL5	0.00394	3.55669	3.88971	3.51393	3.86387
OGDHL	0.00394	3.48753	4.25916	3.276	3.77102
SDCBP2	0.00394	3.41836	3.82347	3.35722	3.67777
ULBP2	0.00394	3.31231	4.21074	3.07921	3.65031
ATG10	0.004203	3.87593	4.44293	3.83794	4.44026
IGSF9B	0.004364	3.21077	3.44145	3.1878	3.40921
CCIN	0.004364	3.03483	3.14882	3.02208	3.13575
LSM3	0.004364	8.87231	9.3612	8.82181	9.49024
CCDC167	0.004364	8.96688	9.4683	8.97085	9.63504
LHFPL6	0.004364	4.92253	3.51552	4.57708	3.41972
DENND2A	0.004364	3.5381	3.39664	3.53901	3.38582
BIRC8	0.004364	3.13572	2.98961	3.14615	2.96209
ACAD8	0.004364	4.66434	4.94255	4.70582	4.89515
EMID1	0.004364	3.9077	4.53793	3.81204	4.55027
FGD2	0.004364	3.21103	3.01276	3.16599	3.0076
FGGY	0.004364	5.57295	6.43239	5.85977	6.60186
HAT1	0.004364	9.69721	10.0051	9.69715	9.95959
DYRK2	0.004364	7.16741	6.56019	7.06958	6.46225
CFAP36	0.004364	6.70652	7.36385	6.90304	7.30039
EYA4	0.004364	3.80719	3.23281	3.36438	3.23947
ATAT1	0.004364	4.21493	4.48521	4.11607	4.45381
DDX5	0.004364	11.6236	11.895	11.7347	11.9146
GDAP1	0.004364	4.02902	4.70525	3.94796	4.76716
GPBP1L1	0.004364	7.77609	8.09494	7.76922	8.06436
CDKAL1	0.004364	3.60064	3.95998	3.5725	3.86059
FANCE	0.004364	4.3498	3.92012	4.24147	3.92562
CSRNP1	0.004364	4.41832	4.06639	4.45921	3.97134
BASP1	0.004364	6.63979	3.7092	8.15915	3.49926
ERG28	0.004364	3.96054	4.1738	3.9748	4.11697
CCDC57	0.004364	4.06703	4.29733	4.07963	4.27456
GPR6	0.004364	3.35672	3.25292	3.36971	3.23716
PBX2	0.004364	5.3413	5.68133	5.29843	5.62524
S100A11	0.004364	4.68548	6.84038	4.11837	7.04931
UBXN2B	0.004364	3.2351	3.43975	3.2276	3.44257
UBR2	0.004364	4.13203	4.44469	4.08465	4.44339
MINDY1	0.004364	3.96103	3.63784	3.91985	3.64238
YIF1A	0.004364	6.56113	7.04909	6.69084	7.15505
MFAP4	0.004364	3.89563	5.72382	3.5341	5.85861
NR4A1	0.004364	4.67551	4.11627	4.36732	4.05104
ZNF114	0.004364	4.43519	3.19805	3.61722	3.06042
UQCC1	0.004364	4.63214	5.04518	4.66462	5.04633
MFNG	0.004364	6.94715	5.89698	6.84794	6.25096
PEA15	0.004364	6.13266	5.29632	6.05945	5.15903
SLC27A1	0.004364	3.309	3.17606	3.29101	3.14737
OXLD1	0.004364	4.81849	5.19506	4.7509	5.15739
NDUFB2	0.004364	10.303	10.932	10.2699	10.8562
MORN3	0.004364	3.40053	3.69484	3.39515	3.69966
PLEK2	0.004364	3.28679	3.09371	3.27599	3.14295
TRBV9	0.004364	3.29246	4.98018	3.21909	3.59862
PANX1	0.004364	4.73425	5.25922	4.79094	5.17946
UBE2V2	0.004364	9.70757	10.0358	9.67219	10.0417
TCP1	0.004364	8.41606	8.79191	8.5624	8.81684
SVBP	0.004364	7.54773	8.163	7.64649	8.0536
SHC4	0.004364	3.0063	3.20862	2.99441	3.12961
PLPP1	0.004364	6.53183	7.59341	6.62174	7.94836
SUB1	0.004364	7.33697	7.97692	7.3306	8.15498
SNF8	0.004364	9.56919	10.0813	9.53641	10.1839
SLC16A10	0.004364	4.18567	4.80585	4.02181	4.81427
NOTCH1	0.004364	3.668	4.25133	3.61814	4.22107
PNPLA4	0.004364	3.6592	3.24435	3.58822	3.2236
TRAPPC3	0.004364	8.9598	9.3242	9.03086	9.34769
PPP5C	0.004364	5.68919	5.23868	5.70958	5.23229
SMAD1	0.004364	7.81647	6.28621	8.2236	6.83319
MAP2K3	0.004364	7.08615	6.28227	7.0488	6.27733
MPHOSPH6	0.004364	4.32656	4.73462	4.27098	4.76997
TIGD2	0.004364	4.62647	5.73986	4.64295	5.95919
SNAPC4	0.004364	7.14877	6.61473	7.21434	6.60854
MFSD14A	0.004364	8.35143	8.56948	8.33299	8.56675
RP11_252A24.7	0.004364	7.14572	6.26959	7.08842	6.26349
LIMS2	0.004828	3.49138	4.19958	3.40692	4.27805
EXOC6	0.004828	6.61919	7.13964	6.6965	7.10244
CAMSAP2	0.004828	4.24214	3.5059	4.03476	3.41247
HAPLN3	0.004828	3.2162	3.44082	3.21428	3.36819
ALS2	0.004828	3.56758	3.81806	3.59243	3.77588
BIN3	0.004828	5.41244	5.92208	5.56499	5.94959
ARSD	0.004828	3.65423	3.32811	3.54765	3.27777
CTNNBL1	0.004828	7.01505	7.64442	6.98777	7.72486
COL16A1	0.004828	3.747	3.93863	3.72707	3.88702
HCST	0.004828	5.5674	7.48782	5.13509	8.15944
ANKIB1	0.004828	7.72555	8.15334	7.74746	8.14339
ARSG	0.004828	4.07674	4.66072	3.69407	4.58753
LPAR4	0.004828	3.19898	3.33925	3.15717	3.2948
EXD3	0.004828	3.8603	3.54764	3.73439	3.51852
JAZF1	0.004828	5.59891	4.61523	5.64742	4.47775
AKAP17A	0.004828	4.41492	4.07489	4.40693	4.10323
EPHX4	0.004828	2.79202	3.51969	2.78306	3.16874
ERCC6L	0.004828	5.59866	6.50399	5.82172	6.61845
CCR4	0.004828	3.02121	3.863	3.03073	3.15124
ECE1	0.004828	4.61465	5.03057	4.59009	5.02243
KLHL6	0.004828	5.86914	4.69877	5.95359	4.81801
ABHD3	0.004828	8.07604	7.44132	8.08208	7.47341
GMDS	0.004828	7.16758	7.71436	7.17718	7.73231
DEFB116	0.004828	2.84079	2.94456	2.84218	2.93922
VNN2	0.004828	4.61685	3.40475	3.92361	3.35299
NPC1	0.004828	5.27655	4.37826	4.75599	4.41638
PELI1	0.004828	5.03099	4.21396	4.77495	4.05133
RAPGEF3	0.004828	3.39749	3.24762	3.34592	3.23789
ROR1	0.004828	4.45109	3.42153	4.10107	3.41603
OAS3	0.004828	4.02589	4.39866	3.97162	4.30511
PREX2	0.004828	2.82908	3.00478	2.82511	2.91521
STK10	0.004828	6.26316	5.37364	6.33772	5.53477
ZFP3	0.004828	3.2018	3.02526	3.20947	3.00748
NDUFS4	0.004828	9.87081	10.3131	9.88531	10.2482
TEC	0.004828	5.22507	3.84612	5.06818	3.59504
ZNF426	0.004828	4.01494	4.43175	4.02239	4.46494
VDAC3	0.004828	10.6237	10.9821	10.5388	10.9685
TMC8	0.004828	3.78275	4.37927	3.85186	4.25501
POLR2B	0.004828	10.8604	11.1303	10.8997	11.1628
RAB11B	0.004828	3.48676	3.71455	3.43962	3.82944
NIPAL3	0.004828	6.2691	6.92765	6.42323	6.78604
SLC50A1	0.004828	6.19338	5.65091	6.15442	5.53506
SQSTM1	0.004828	7.54041	6.92298	7.65021	6.57362
SERGEF	0.004828	6.21739	6.66925	6.2944	6.84776
P2RX7	0.004828	3.63837	3.33906	3.56694	3.18735
SNAI3	0.004828	3.8286	3.68266	3.80749	3.57825
PPT1	0.004828	7.91244	8.26621	7.87889	8.29631
SLC26A6	0.004828	5.07029	5.64131	5.06345	5.65359
RANBP3L	0.004828	2.90905	2.8055	2.91962	2.80552
TSPAN31	0.004828	4.70107	4.03998	4.80861	3.9417
TAMM41	0.004828	4.54314	5.00806	4.41586	5.07153
SLC36A4	0.004828	5.08874	6.04558	5.32603	6.42696
YEATS2	0.004828	8.63117	8.18003	8.79497	8.28679
PDE8A	0.004828	6.7774	5.90704	6.7967	5.85945
SIGIRR	0.004828	5.96346	6.55704	6.14119	6.57856
PTPRD	0.004828	3.54084	4.5219	3.27556	4.27836
UAP1L1	0.004828	5.25324	4.34974	4.79398	4.01598
NFE2	0.004828	3.03201	4.57839	3.00548	3.90106
GATA2	0.005334	3.19842	3.51158	3.18061	3.27013
C6orf226	0.005334	5.84552	6.64529	5.82442	6.83347
DCTN2	0.005334	8.44655	8.90711	8.48107	8.87468
ATP1B1	0.005334	4.59455	5.503	4.56157	5.2798
LEO1	0.005334	7.58704	7.94279	7.60483	8.05995
ATP2A3	0.005334	4.16564	4.71266	4.16517	4.50574
HLA_DQB1	0.005334	4.32008	3.79378	3.95786	3.39637
ARRB2	0.005334	5.41985	6.0487	5.32792	5.94064
EIF2AK2	0.005334	6.79598	7.43024	7.0386	7.49618
GTF3A	0.005334	10.8209	11.1957	10.7676	11.318
DNAJB5	0.005334	3.4516	3.7212	3.38395	3.6483
GANC	0.005334	4.81081	4.43361	4.83629	4.47487
DHX57	0.005334	5.08399	5.75413	5.09877	5.7424
CD163L1	0.005334	4.32009	3.29413	3.86797	3.19842
DENND1B	0.005334	4.98869	6.0817	4.64069	5.85429
CTSL	0.005334	4.28655	3.82121	4.16931	3.8369
EDEM2	0.005334	5.13352	5.26402	5.081	5.23912
L3MBTL4	0.005334	3.37316	3.08717	3.2249	3.09507
ALPL	0.005334	3.16257	3.08104	3.16043	3.04921
AGL	0.005334	5.55696	6.26583	5.5629	6.22202
LOXL1	0.005334	4.22216	4.84423	4.11568	4.67224
CPPED1	0.005334	5.17418	6.16927	5.32969	5.97447
ATP13A2	0.005334	5.00498	5.33253	4.81895	5.395
BAK1	0.005334	4.56065	5.06199	4.51314	5.15128
C14orf119	0.005334	3.2027	3.31589	3.20963	3.28882
ABCA12	0.005334	2.97297	3.06029	2.98556	3.05172
IFI27L2	0.005334	6.58736	7.57122	6.79676	7.42991
KIAA1324	0.005334	3.99272	3.19036	3.30682	3.18011
DPY19L3	0.005334	3.36742	3.22944	3.35987	3.25696
DOK7	0.005334	3.47998	3.23053	3.42876	3.22006
DOCK11	0.005334	9.09159	8.39311	8.94232	8.47928
HSPBP1	0.005334	5.47327	6.08013	5.2832	6.12909
SNAPC5	0.005334	7.03586	7.40376	7.05447	7.50093
TNKS	0.005334	5.17409	4.82963	5.05585	4.86125
MTSS1	0.005334	3.61886	3.21069	3.10844	2.92324
SLC35F5	0.005334	5.76987	5.2022	5.86944	5.19655
NR3C1	0.005334	8.63737	7.55251	9.06593	7.53519
UGDH	0.005334	6.57195	5.71806	6.52934	5.86937
MAN2B2	0.005334	4.40848	4.67028	4.3708	4.66725
PACSIN3	0.005334	4.50621	3.72138	4.35572	3.63325
ZNF805	0.005334	4.46076	4.89973	4.37038	4.85424
STARD3NL	0.005334	7.98889	8.61897	8.03766	8.64064
STARD3	0.005334	5.04507	5.31579	4.92617	5.26032
YES1	0.005334	4.53434	5.44005	4.11213	5.44269
NIPSNAP2	0.005334	8.20371	8.58127	8.26344	8.55747
SH3GL3	0.005334	3.02439	4.48225	3.00101	3.13243
UBOX5	0.005334	3.85426	4.12605	3.82026	4.17154
SEC62	0.005334	7.26764	6.78653	7.26916	6.76169
PRKAA1	0.005334	4.02485	4.26136	3.99322	4.18415
TBC1D3P2	0.005334	3.06397	2.86717	3.0013	2.87588
SAMSN1	0.005334	4.68893	7.18248	3.0928	7.83219
UQCRC1	0.005334	7.24492	7.70264	7.30811	7.7486
RAD54B	0.005334	7.12286	7.91238	7.43219	7.93065
RAF1	0.005334	7.00204	7.31427	7.10519	7.32963
TSPYL4	0.005334	4.06282	4.61368	4.14489	4.83763
PLSCR1	0.005334	6.00741	6.92385	6.51081	7.12329
SNX5	0.005334	7.93566	7.49134	7.93275	7.40756
TRIO	0.005334	4.85463	4.07256	4.98658	3.77647
PRR14	0.005334	5.89248	6.59405	5.80914	6.70585
SSSCA1	0.005334	8.71748	9.22603	8.69057	9.38963
PLEKHM1	0.005334	6.23173	6.97876	6.41617	6.83488
EFCAB14	0.005887	5.60161	5.98047	5.46948	5.92187
ADAM17	0.005887	5.07077	4.77962	5.01764	4.68542
DHRSX	0.005887	4.97666	4.51504	4.85355	4.5996
GRAMD2B	0.005887	3.35309	3.66016	3.30741	3.53206
HAGH	0.005887	7.13407	8.07331	7.5252	8.08635
CHPT1	0.005887	8.50479	7.73886	8.59084	7.83868
KRCC1	0.005887	6.94968	6.25898	7.00502	6.49252
IPCEF1	0.005887	3.51048	4.26082	3.16051	3.95189
CECR2	0.005887	3.81073	3.15374	3.68586	3.21429
AFF3	0.005887	5.72294	4.50581	6.19449	4.66052
IRX2	0.005887	4.65624	3.21925	3.32631	3.20667
ALKAL2	0.005887	4.98075	3.34131	3.56494	3.39588
FAM212B	0.005887	3.92184	3.61443	3.75311	3.49997
CREBRF	0.005887	5.71259	4.94808	5.60874	4.81821
FBXO45	0.005887	7.24923	7.68773	7.18823	7.72694
ARL6	0.005887	3.69742	3.98242	3.53092	3.97106
CDSN	0.005887	3.14015	3.2866	3.12237	3.2725
CHST12	0.005887	6.64726	7.6951	6.42602	8.03062
GTF2I	0.005887	3.14967	2.93554	3.06649	2.93294
KCNS3	0.005887	4.77829	3.58629	4.06135	3.46883
KCNQ5	0.005887	3.31369	3.06467	3.24861	3.05962
CPOX	0.005887	5.19802	5.75614	5.18989	5.75126
CYB561D2	0.005887	6.20716	6.75793	6.28969	6.78581
HPD	0.005887	2.83547	2.71799	2.79376	2.73336
ETV7	0.005887	3.54198	3.3619	3.52059	3.36086
ABCA6	0.005887	3.55979	2.91793	3.17303	2.8423
FAM160B1	0.005887	5.62442	6.18636	5.35023	6.10982
ERGIC1	0.005887	6.66416	5.8373	6.93376	5.52743
EPHX2	0.005887	3.63414	5.07246	3.51075	4.26603
DENND1C	0.005887	4.3996	5.15467	4.33221	4.83273
TMEM121	0.005887	3.94842	3.42316	3.75938	3.38131
PLA2G15	0.005887	4.08481	3.80067	4.02467	3.78035
RNF213	0.005887	4.75929	5.2971	4.73691	5.0763
RAPGEF1	0.005887	5.12409	4.5106	5.09832	4.46245
ZNF428	0.005887	7.96752	8.49332	8.07805	8.63307
MIR17HG	0.005887	6.06938	5.16702	5.84629	4.97316
RASGRF1	0.005887	3.25786	3.14889	3.22003	3.15602
PRPF38A	0.005887	8.68386	9.00237	8.64903	9.04117
STX3	0.005887	5.21331	4.27192	5.27631	3.77339
PQLC2L	0.005887	3.14196	3.03765	3.13923	3.05513
TSHZ3	0.005887	3.62227	4.264	3.48804	3.68211
OR10K2	0.005887	3.03943	2.92948	3.04515	2.92763
ZNF92	0.005887	8.34244	7.82328	8.41846	7.94699
SLC16A11	0.005887	3.17261	3.06056	3.17805	3.06079
USP31	0.005887	6.84467	6.2393	6.66629	6.25136
TBKBP1	0.005887	3.69343	3.42114	3.60679	3.40128
PLXNA3	0.005887	4.38847	3.9452	4.40318	3.97637
TFIP11	0.005887	8.06962	7.57742	8.13842	7.52809
RNF135	0.005887	6.10534	4.76762	6.36031	5.13488
ZBTB48	0.005887	6.1028	5.53584	5.92037	5.65045
TXNRD2	0.005887	3.87696	3.62537	3.84603	3.61851
ZNF524	0.005887	4.2401	4.0055	4.28625	3.88787
WWC3	0.005887	6.75132	5.61998	7.16679	5.6509
NRL	0.005887	3.655	3.48148	3.59061	3.44896
PBX3	0.005887	7.47681	6.69356	7.33152	6.79216
TPTE	0.005887	2.68091	2.55194	2.65665	2.57247
POLR3C	0.005887	7.83438	7.3606	7.74759	7.24254
POLR2K	0.005887	9.52513	9.89724	9.56671	10.0444
NSMAF	0.005887	8.06098	8.49215	8.16678	8.58389
WDSUB1	0.005887	7.45316	6.59924	7.50218	6.6484
UNC5CL	0.005887	4.11595	4.43973	4.14105	4.51296
PCDH10	0.005887	3.35227	3.41718	3.05091	3.20131
PLEKHA8P1	0.005887	3.35507	3.61804	3.28028	3.54778
MSX1	0.005887	5.44097	4.98275	5.42849	4.77456
PHYKPL	0.005887	5.32568	4.63302	5.2169	4.45186
RAD51C	0.005887	7.70162	8.40559	7.87394	8.51388
SH2D3C	0.005887	6.32148	5.2448	6.47441	5.21957
NAT14	0.005887	6.74296	7.38372	6.89823	7.49601
PPP1R3D	0.005887	4.05975	3.74698	3.97642	3.69459
HIST1H3A	0.006488	2.99383	3.18702	3.01576	3.23004
GOLIM4	0.006488	4.49598	3.8647	4.35131	3.52289
LRRFIP2	0.006488	5.41081	5.87914	5.36414	5.68693
CENPO	0.006488	5.25963	5.81281	5.2394	5.72989
APEH	0.006488	7.39956	7.98329	7.48316	8.00167
KIAA0368	0.006488	5.70381	4.84357	5.82188	5.20229
DACT3	0.006488	4.22543	3.60273	4.00622	3.49642
AMZ2	0.006488	8.19854	8.79177	8.17403	8.71666
HOXB7	0.006488	3.97696	5.15242	3.62191	4.13102
HILS1	0.006488	3.28269	3.11706	3.30433	3.13408
IKZF5	0.006488	4.76855	4.54797	4.73892	4.56391
CHID1	0.006488	4.22854	4.43607	4.2465	4.42299
CISD3	0.006488	7.11498	8.0971	7.27839	8.25817
ETS1	0.006488	5.23224	6.31481	4.94649	6.10876
ATXN3	0.006488	4.48634	4.8255	4.34492	4.76487
LARGE2	0.006488	3.38567	2.96284	3.24526	3.00239
CGN	0.006488	3.52314	3.91333	3.5404	3.76812
ABHD17C	0.006488	5.99612	4.86882	6.25718	5.14608
ACRBP	0.006488	4.69522	4.19849	4.45462	4.10724
C7orf72	0.006488	3.98569	3.24846	3.51212	3.14899
DCLRE1C	0.006488	6.74097	6.12009	6.72426	6.1455
IQCC	0.006488	3.61029	3.91562	3.64823	3.84492
C4orf48	0.006488	6.81148	8.25788	7.58534	8.38826
GTF2H5	0.006488	7.27236	8.0156	7.27717	8.11466
ATP6V1D	0.006488	7.53107	7.98603	7.47395	8.16616
LACTB	0.006488	5.25562	6.15865	5.02615	6.03671
IQGAP1	0.006488	8.25266	7.61306	8.13426	7.63099
ARRDC1	0.006488	4.83283	4.37881	4.85206	4.464
LDLRAD2	0.006488	3.28873	3.04908	3.1811	3.09114
ID2	0.006488	4.76886	3.51372	4.36567	2.94487
INSL3	0.006488	3.181	3.34647	3.19824	3.4099
CLIC4	0.006488	7.31808	6.84451	7.38548	6.79315
CD1D	0.006488	3.70894	5.51791	3.45877	4.98294
ZBTB9	0.006488	3.32214	3.56	3.33118	3.49499
VRK3	0.006488	5.1129	5.5264	5.26721	5.55075
S1PR4	0.006488	5.31835	4.37389	5.34892	4.64531
SKAP2	0.006488	6.85927	4.93307	7.57752	3.6735
SERPINB9	0.006488	5.2047	3.93275	5.15302	3.51869
PRAF2	0.006488	3.87344	4.38989	3.7652	4.50475
UBR7	0.006488	6.72435	7.32709	6.64289	7.50274
ZNF575	0.006488	3.35183	3.50202	3.34462	3.48968
MKS1	0.006488	4.28601	4.6191	4.1225	4.66737
VPS26A	0.006488	7.59097	7.98143	7.63546	8.02439
SNRPB2	0.006488	9.61712	9.86395	9.58924	9.86789
PTPRU	0.006488	3.19516	3.6959	3.17599	3.38899
SNX11	0.006488	4.70046	5.04525	4.69217	4.98183
SPATA13	0.006488	3.31929	3.6086	3.23643	3.59245
OPA3	0.006488	4.02298	4.21501	4.02003	4.19608
SPAG6	0.006488	4.44015	3.1361	3.30987	3.123
RNF24	0.006488	5.35569	6.10557	5.45041	6.12947
NDUFS6	0.006488	10.5024	10.9474	10.4637	10.9115
MRGPRX2	0.006488	2.78268	2.9079	2.77047	2.88571
OSM	0.006488	3.48559	4.0233	3.43557	3.71246
SIKE1	0.006488	5.81412	6.59413	6.091	6.56027
MYO7B	0.006488	3.74643	5.18848	3.59152	4.45774
PSMB2	0.006488	9.16275	9.7239	9.18069	9.62214
RCOR3	0.006488	5.78418	5.48111	5.81925	5.48646
RRP36	0.006488	7.56161	8.35666	7.5979	8.32666
SRGAP2	0.006488	4.16897	3.90254	4.0367	3.90375
SIGLEC11	0.006488	3.2077	3.03071	3.14854	2.99731
TREML2	0.006488	3.37305	3.60482	3.31241	3.57491
SORT1	0.006488	5.21982	6.01323	5.28205	5.97557
TPM3	0.006488	4.33918	4.67792	4.36668	4.71206
CD99L2	0.007143	3.94644	4.17467	3.87717	4.12308
AC010323.1	0.007143	9.92347	10.2726	9.93071	10.3653
ITIH3	0.007143	3.95419	3.28871	3.51173	3.23584
BICRAL	0.007143	3.42299	3.2645	3.37076	3.25064
GTF2B	0.007143	9.41315	9.66603	9.38046	9.53943
AQP8	0.007143	3.4346	3.56344	3.42797	3.55839
ABHD18	0.007143	5.30423	5.75574	5.23639	5.87944
CAPSL	0.007143	4.64072	3.76753	4.51362	3.39985
CEP85L	0.007143	4.32386	5.12529	4.20773	5.37449
GALK2	0.007143	6.70043	7.15563	6.66482	7.27324
BRMS1	0.007143	6.68055	6.95647	6.67709	7.04523
FAM92A	0.007143	5.21549	6.33246	5.05625	6.53016
IQCG	0.007143	4.33808	5.24988	3.99716	4.59277
[truncated: 15,736 more rows]

## Sheet: CCLE
gene	p	B-ALL_mean	B-ALL_median	T-ALL_mean	T_ALL_median
COX10_AS1	9.08e-10	2.27897	1.97275	0.0261069	0.010815
DUSP7	9.08e-10	5.95395	5.52144	0.851612	0.91233
NCF1	9.08e-10	26.8227	15.6117	0.0831981	0.06067
SLC30A7	9.08e-10	3.57733	3.57633	0.337543	0.222885
DNAJC3_AS1	9.08e-10	1.25483	1.19541	0.0457525	0.015655
NPHP1	9.08e-10	0.278156	0.20853	8.8676	8.08586
NPM1P9	9.08e-10	0.62268	0.65047	0.01643	0.013385
RP11_565F19.2	9.08e-10	0.734981	0.64078	0.0309688	0.0266
PRKAG1	9.08e-10	13.6005	10.5246	0.0335756	0.028955
PMS2P4	9.08e-10	3.1192	2.81865	0.162998	0.086855
ELMOD2	9.08e-10	5.19185	4.87708	0.291824	0.04067
TMEM161B	9.08e-10	3.09768	3.42874	0.0604731	0.03266
ANKRD49	9.08e-10	9.38836	9.44805	0.391595	0.2176
SKIL	9.08e-10	3.68967	2.79388	0.0859494	0.08266
TRBC2	9.08e-10	22.9675	0.42295	1743.95	1580.21
CTD_2256P15.2	9.08e-10	0.910165	0.79009	0.0295188	0.02142
SIRT5	9.08e-10	3.33899	3.37242	0.282716	0.14121
COMMD1	9.08e-10	6.09349	5.90846	0.976751	0.401045
BLM	9.08e-10	13.2381	12.6519	0.160134	0.04345
NUDT18	9.08e-10	4.67444	4.94595	0.0819744	0.02382
RP11_529E10.6	9.08e-10	0.783794	0.622605	0.049135	0.02009
RP11_640I15.1	9.08e-10	0.603969	0.461035	0.0175944	0.00692
KLHDC2	9.08e-10	14.055	14.0011	1.63733	1.30842
LAMTOR5_AS1	9.08e-10	4.64953	4.60989	0.130199	0.080345
NDUFB8P2	9.08e-10	0.237858	0.240235	0.0157556	0.01148
NFXL1	9.08e-10	5.74742	5.56057	0.106813	0.03709
RAB21	9.08e-10	8.86186	8.49601	0.202144	0.05567
NDUFA7	9.08e-10	1.06195	0.92665	0.0411669	0.023815
DUSP8P5	9.08e-10	1.89784	1.93705	0.0507681	0.05234
NRDE2	9.08e-10	3.54717	3.4806	0.103027	0.04498
SFSWAP	9.08e-10	11.1807	10.7518	3.90594	3.89305
NIPAL3	9.08e-10	2.76707	2.4521	0.127482	0.06596
GPX2	9.08e-10	0.282954	0.25527	0.0192162	0.01377
IFT43	9.08e-10	1.71392	1.58254	0.0282219	0.009135
PPP1R21	9.08e-10	7.51706	6.70226	1.63336	1.24375
CTD_2013M15.1	9.08e-10	0.0803739	0.0685	4.98403	4.55745
CTC_542B22.2	9.08e-10	1.10057	1.10859	0.0190294	0.015495
BRI3	9.08e-10	11.3842	10.846	0.489785	0.33151
RPL15P2	9.08e-10	1.42574	1.14214	0.0997806	0.06363
GALC	9.08e-10	1.88695	1.53398	11.9881	11.8143
CYP2T2P	9.08e-10	0.0776994	0.070085	1.33892	1.23843
USE1	9.08e-10	10.0146	8.94629	1.13226	0.814865
ADCK1	9.08e-10	2.61551	2.28994	0.135502	0.024765
MPV17L2	9.08e-10	11.4381	10.2555	0.372159	0.058925
AC009403.2	9.08e-10	4.08925	3.57919	0.380134	0.30556
MRRF	9.08e-10	14.2428	13.3486	1.73871	0.58802
RP11_379K17.12	9.08e-10	5.43767	4.56703	0.106413	0.061605
PTK6	9.08e-10	0.218543	0.13707	0.0086912	0.00718
CTC_428G20.6	9.08e-10	3.24473	3.42007	16.7483	15.5546
CBWD7	9.08e-10	0.834842	0.866465	0.0343137	0.029095
MFN1	9.08e-10	8.66937	7.57045	0.117342	0.014485
SARNP	9.08e-10	8.95757	8.73122	0.202116	0.053605
WASH3P	9.08e-10	8.72088	8.3246	0.305704	0.20258
RAB42	9.08e-10	0.696462	0.27028	0.0110838	0.009235
TLDC1	9.08e-10	2.83991	2.95605	0.354283	0.29394
AGO2	9.08e-10	10.2193	10.2056	0.0144256	0.0081
C2CD5	9.08e-10	14.5765	12.3452	1.25705	0.639715
NRIP2	9.08e-10	1.29181	1.21105	0.0121538	0.00653
RP11_127L20.5	9.08e-10	1.38878	1.33138	0.0793862	0.05666
ADAT2	9.08e-10	4.95185	5.14573	0.306404	0.23836
ZNF260	9.08e-10	5.51276	4.86531	0.185639	0.13515
TBC1D17	9.08e-10	9.87656	8.95553	0.101431	0.02346
EPM2A	9.08e-10	3.46197	2.52632	0.0746262	0.067865
PAX5	9.08e-10	85.2249	84.6831	0.0512425	0.031705
CAHM	9.08e-10	0.600208	0.6249	0.0550831	0.052255
CHST7	9.08e-10	1.70544	1.15707	0.0454688	0.040545
RPL21P11	9.08e-10	1.82079	1.453	0.124069	0.09407
TRMT1L	9.08e-10	5.969	5.51357	0.182452	0.062325
CUL7	9.08e-10	6.86795	5.48722	0.0640813	0.05261
GPR146	9.08e-10	3.11819	1.08884	0.0251862	0.01872
C1D	9.08e-10	7.29586	7.05134	0.900637	0.480165
MAP2K6	9.08e-10	2.37511	1.97212	92.2626	69.8511
TAF6L	9.08e-10	11.3288	11.6366	2.80712	3.25471
CTA_217C2.2	9.08e-10	0.726348	0.75158	0.0280088	0.018495
ITFG2	9.08e-10	11.1296	10.207	0.07592	0.01971
ACOX3	9.08e-10	4.77726	4.60149	0.114367	0.0214
RP11_10K16.1	9.08e-10	0.803728	0.708345	0.0203819	0.01311
C9orf69	9.08e-10	9.83442	9.35329	0.92866	0.67952
PHF13	9.08e-10	9.81719	10.8413	0.265793	0.176755
IFRD2	9.08e-10	40.9116	40.9204	0.514037	0.228905
PTRF	9.08e-10	0.235818	0.236705	0.0280212	0.01957
AC004917.1	9.08e-10	4.55983	4.45956	0.595581	0.46283
BANP	9.08e-10	2.76125	2.80294	0.0475819	0.03277
CIRBP_AS1	9.08e-10	1.74654	1.80714	0.0868969	0.01612
RP11_1017G21.4	9.08e-10	6.54311	6.46438	0.307306	0.066805
RP11_387D10.2	9.08e-10	1.24792	1.13397	0.0697106	0.048495
KIAA0196_AS1	9.08e-10	4.01124	3.822	0.0355306	0.014335
SNORA65	9.08e-10	0.989146	0.86484	0.0197762	0.016075
AC079922.3	9.08e-10	1.11391	0.94967	0.0305394	0.019525
RP11_46A10.5	9.08e-10	3.01595	2.82364	0.302183	0.280875
IL17RA	9.08e-10	4.82172	3.79624	0.209276	0.10542
UQCC1	9.08e-10	8.23314	7.66542	0.394874	0.12698
IL9RP3	9.08e-10	1.36532	1.052	86.9537	53.9911
RPS6KA4	9.08e-10	14.9675	12.2781	0.410051	0.048175
BPGM	9.08e-10	6.65543	5.70774	0.77404	0.614205
UVRAG	9.08e-10	5.71718	4.8681	0.203529	0.034005
CX3CR1	9.08e-10	0.0544733	0.035975	5.56316	5.06405
CRIPT	9.08e-10	6.68061	6.61451	0.691226	0.294215
RIBC1	9.08e-10	0.339957	0.30134	0.0183044	0.0073
RPUSD2	9.08e-10	11.1984	10.2062	1.32442	1.31507
CETN2	9.08e-10	10.8481	9.8085	0.07975	0.06174
NAIF1	9.08e-10	4.37683	4.2428	0.220378	0.215745
REEP5	9.08e-10	14.7086	14.0931	0.149932	0.03952
RP11_312O7.2	9.08e-10	5.83249	5.47746	0.0354056	0.010285
RP1_159A19.3	9.08e-10	3.99251	4.09956	0.139045	0.116785
HIST1H3I	9.08e-10	0.671882	0.48371	0.0607706	0.03106
HEATR3	9.08e-10	8.97574	8.58249	0.310237	0.109735
RP11_109N23.6	9.08e-10	0.747527	0.849435	0.0221231	0.02037
LEPROT	9.08e-10	6.82891	6.82331	0.273231	0.13484
KIAA1429	9.08e-10	13.6633	13.3876	1.85927	1.5935
RP11_144G6.4	9.08e-10	0.627024	0.62598	0.0278562	0.02551
RP3_388E23.2	9.08e-10	0.42872	0.39955	2.02271	1.91524
RP1_67K17.3	9.08e-10	6.39107	4.68523	0.210918	0.20105
RP11_140H17.1	9.08e-10	2.94125	2.80213	0.0515612	0.037585
RP11_1114A5.5	9.08e-10	0.400415	0.376725	0.0221031	0.01929
TMEM234	9.08e-10	2.96647	2.66944	0.281356	0.19769
RP5_1065J22.8	9.08e-10	0.612561	0.500525	0.0267456	0.01931
AC108479.2	9.08e-10	1.71575	1.79282	0.0536869	0.02148
TAF3	9.08e-10	5.2685	5.39337	0.831879	0.79348
SLU7	9.08e-10	14.7798	14.8566	0.131789	0.11974
CTD_2619J13.14	9.08e-10	2.26897	2.21547	0.101306	0.08358
GCFC2	9.08e-10	4.42829	3.82215	21.7365	21.1499
'DECR2	9.08e-10	10.3697	7.31726	0.825932	0.798105
EFCAB14	9.08e-10	15.2567	15.5404	0.713151	0.124935
RP5_1157M23.2	9.08e-10	1.05736	1.17124	0.0461919	0.02869
RP11_428J1.5	1.82e-09	0.725644	0.730375	0.0233819	0.011215
GNG7	1.82e-09	22.6051	16.5606	0.678713	0.149185
ACRC	1.82e-09	1.08622	0.79803	0.0692681	0.023695
AFTPH	1.82e-09	13.9595	14.7887	0.887715	0.32123
ANKMY1	1.82e-09	6.32945	6.44965	0.656256	0.312135
ABHD8	1.82e-09	4.65664	4.44595	0.0853137	0.024005
HACE1	1.82e-09	3.41205	3.49155	0.134325	0.042805
PDLIM1	1.82e-09	186.624	158.798	3.63511	0.780405
CHD2	1.82e-09	14.6275	14.2668	1.33567	0.94355
RP11_864J10.4	1.82e-09	0.940826	0.928895	0.142026	0.099935
TOLLIP_AS1	1.82e-09	0.536381	0.519595	0.0460088	0.03962
UBXN7_AS1	1.82e-09	1.16799	1.13444	0.142571	0.111685
ZCCHC9	1.82e-09	6.05243	5.94429	0.600624	0.025275
DFFB	1.82e-09	3.66047	3.75967	0.12176	0.01593
CTD_2126E3.3	1.82e-09	1.99242	2.02197	0.050025	0.014615
MNS1	1.82e-09	2.94396	2.17477	0.0629256	0.062835
WDR53	1.82e-09	7.75707	8.0806	13.0675	11.803
C1orf74	1.82e-09	4.95264	4.6943	0.197747	0.02952
RP11_535C21.3	1.82e-09	0.19181	0.16395	71.3991	40.023
PPTC7	1.82e-09	10.7468	10.63	0.0575975	0.010325
POLD1	1.82e-09	42.5731	42.8858	10.3259	9.09609
LINC00431	1.82e-09	2.06323	1.41847	0.0660775	0.048295
GTF2H5	1.82e-09	3.10001	2.92312	0.185705	0.034065
CTD_2555A7.3	1.82e-09	1.34723	1.29408	0.126342	0.069755
SYK	1.82e-09	41.6915	33.2829	1.0404	0.076715
C6orf203	1.82e-09	5.70037	5.37566	0.370882	0.04867
CCZ1B	1.82e-09	15.0712	14.8484	0.681303	0.147765
NOL9	1.82e-09	5.88703	5.8834	0.808983	0.276305
TOR1AIP1	3.63e-09	6.03242	6.28099	0.979212	0.51633
RP11_572M11.4	3.63e-09	1.53701	1.67301	0.0402419	0.0241
RP11_203M5.2	3.63e-09	2.48031	2.3483	0.0844062	0.012755
AC092651.1	3.63e-09	1.31432	1.22514	0.19257	0.175
PKN2	3.63e-09	8.00708	8.14842	0.384273	0.10987
C16orf70	3.63e-09	5.504	5.2354	0.536664	0.150535
TNRC18	3.63e-09	7.10337	6.65881	1.10827	0.865845
TSSK3	3.63e-09	0.312968	0.21812	0.0139262	0.01245
CD22	3.63e-09	79.1618	57.7897	0.380763	0.04633
AREL1	3.63e-09	9.95129	10.6636	20.138	20.6984
ZNF589	3.63e-09	4.50008	3.61462	0.350551	0.104315
RP11_206L10.8	3.63e-09	0.488953	0.43631	0.0572738	0.04119
GRK5	3.63e-09	2.62652	1.34119	0.0525731	0.038385
AKTIP	3.63e-09	2.37566	2.54538	0.206549	0.11364
UBXN11	3.63e-09	10.1116	9.43248	0.374944	0.06392
SLC31A2	3.63e-09	0.342107	0.27986	0.0132919	0.01133
UNC93B1	3.63e-09	24.1295	20.3623	1.40314	0.71628
KANSL1	3.63e-09	13.5048	14.5103	1.78297	1.25432
MEF2BNB	3.63e-09	6.51664	5.87625	0.491796	0.059485
PPP2R1B	3.63e-09	11.2871	10.0244	46.822	48.1046
LIAS	3.63e-09	7.37345	7.08908	1.13479	0.631395
C10orf12	3.63e-09	2.98716	2.83724	0.158883	0.03281
RP11_649A18.7	3.63e-09	0.858078	0.884055	0.0653556	0.00959
RP11_843B15.2	3.63e-09	1.19111	1.0654	14.6848	12.7785
RP11_875O11.1	3.63e-09	2.58873	2.33523	0.0712494	0.019235
CEP350	3.63e-09	8.47784	8.71824	0.389029	0.069225
TMEM192	3.63e-09	4.49224	4.14372	1.52033	1.42606
CTC_498J12.3	3.63e-09	4.70842	4.59387	0.189266	0.033165
MIR5090	3.63e-09	1.59512	1.44764	0.0791919	0.02396
NCF4	3.63e-09	71.4951	60.3852	0.331046	0.12544
XRCC6BP1	3.63e-09	10.0604	8.87174	1.3297	0.325655
PCBD1	3.63e-09	6.61454	3.72356	0.0409038	0.03553
COX15	3.63e-09	14.4613	15.1992	3.48166	1.69593
FRAT1	6.35e-09	3.95639	4.04008	19.1856	19.103
INTS4L2	6.35e-09	0.633564	0.637695	0.0774994	0.061725
ZNF624	6.35e-09	1.13146	1.34038	3.7926	2.54803
SPNS3	6.35e-09	5.32145	2.5853	0.02992	0.02676
CIITA	6.35e-09	23.3273	20.2479	0.557966	0.03185
RP11_344E13.3	6.35e-09	9.01324	10.1282	0.612917	0.54303
RP11_178G16.4	6.35e-09	4.04447	3.52595	0.706166	0.639385
LEMD2	6.35e-09	13.2861	12.2789	4.66165	5.32551
CCRN4L	6.35e-09	3.15012	3.02662	14.6429	13.0995
CD74	6.35e-09	757.702	569.949	22.976	0.57904
BTK	6.35e-09	53.4893	48.4635	1.86473	0.128925
MTMR10	6.35e-09	7.79845	7.00552	0.170791	0.04678
ZNF484	6.35e-09	1.21109	1.32547	0.0930194	0.036365
ZFP69B	6.35e-09	2.53889	2.48238	0.148031	0.040605
TATDN2	6.35e-09	3.65783	3.68307	0.354456	0.110395
CTD_2310F14.1	6.35e-09	1.2552	1.23748	0.0681844	0.03072
SCARF2	6.35e-09	0.374229	0.36631	0.03472	0.02807
CXorf21	6.35e-09	56.4804	29.3806	1.1466	0.24626
IFT46	1.09e-08	5.90912	5.9207	16.9193	15.6654
CTD_2132N18.2	1.09e-08	0.331813	0.27415	1.87208	1.95833
FKBP7	1.09e-08	2.17822	2.28608	0.199939	0.09345
ARID2	1.09e-08	9.1618	8.9443	0.660126	0.08797
TNFSF9	1.09e-08	7.23052	1.05341	0.102406	0.0536
DAP3	1.09e-08	41.7081	39.674	4.09622	0.134485
ZNF487	1.09e-08	0.316451	0.29566	0.0392306	0.014345
AC005562.1	1.09e-08	1.19781	1.13294	0.113912	0.03634
BBS9	1.09e-08	1.2353	1.03082	0.206675	0.190935
FEM1B	1.09e-08	10.9517	11.0224	0.551598	0.042695
RP11_175P19.2	1.09e-08	0.705534	0.62147	7.64705	4.09516
RP6_42F4.1	1.09e-08	2.18412	2.10647	0.174936	0.03004
OSGEPL1	1.09e-08	2.95583	3.0002	0.401432	0.139515
SCARB1	1.09e-08	22.0264	21.6449	6.70433	7.19465
RP11_432I5.6	1.09e-08	0.679589	0.61671	0.0422231	0.028695
RP1_64K7.4	1.09e-08	0.620109	0.58436	0.0570962	0.04837
KPTN	1.09e-08	5.7343	3.87491	0.358574	0.0533
RILPL1	1.09e-08	0.201384	0.101975	0.0063162	0.00356
CCNYL1	1.09e-08	3.41363	3.54406	14.4343	12.3152
PSMA6P1	1.09e-08	2.95262	2.9022	20.4303	19.9242
RP11_75L1.2	1.09e-08	73.7274	71.4052	21.1451	21.4205
IKZF4	1.09e-08	1.98182	2.02135	0.10028	0.02489
SLC7A11	1.09e-08	2.21064	1.35048	13.5282	13.7022
SFXN5	1.09e-08	1.78828	1.79916	0.186378	0.10826
RP11_819C21.1	1.09e-08	0.558421	0.45709	0.0633888	0.029745
MEF2C	1.09e-08	52.3285	57.9937	1.24555	0.068245
MEF2D	1.72e-08	37.0442	36.4601	10.9872	10.4396
PIF1	1.72e-08	11.1324	10.7457	1.36763	0.529025
KCTD10	1.72e-08	9.25557	9.10276	20.3855	18.6872
PKNOX1	1.72e-08	5.68838	5.26973	0.921353	0.327635
ACVR1	1.72e-08	1.51595	1.36993	0.14016	0.110735
RP11_511H9.4	1.72e-08	1.29273	1.16661	0.250418	0.193345
RP11_380G5.2	1.72e-08	0.574377	0.42769	3.45692	3.14994
BACH1_IT1	1.72e-08	0.46199	0.3876	0.0675131	0.035015
PLCG1	1.72e-08	17.0564	14.8488	65.0034	55.5759
PJA1	1.72e-08	6.28838	5.74564	1.09246	0.6973
MGAT3	1.72e-08	2.94415	0.481155	0.0346088	0.014555
RBM12B	1.72e-08	5.26781	5.24092	0.299127	0.187645
AC004840.9	1.72e-08	3.16406	2.18352	0.286106	0.04471
RP11_715J22.3	1.72e-08	1.32198	1.13182	0.151951	0.120925
HNRNPA1P35	1.72e-08	8.76393	8.92606	1.09456	0.37297
RECQL5	1.72e-08	4.18519	4.21547	1.16344	0.720775
RP11_452H21.1	1.72e-08	6.44109	5.13954	0.858016	0.03925
TULP4	1.72e-08	3.20017	3.08016	0.216699	0.05391
HLA_DPB1	2.72e-08	58.4694	39.9244	1.57755	0.06395
RP1_59M18.2	2.72e-08	5.87677	5.84441	11.0365	11.079
CTD_3126B10.1	2.72e-08	11.4788	12.106	1.05801	0.407875
CCDC174	2.72e-08	7.91385	7.47511	3.3589	3.20431
MAP3K14_AS1	2.72e-08	0.496079	0.44181	3.33487	3.11047
CTD_3138B18.5	2.72e-08	2.45118	2.50136	0.374559	0.219665
CTD_3099C6.7	2.72e-08	2.34894	2.09558	0.0825794	0.02753
THBS1	2.72e-08	2.11788	0.39919	31.3212	30.6852
AMPD2	2.72e-08	13.9084	14.4274	1.98659	0.692455
ANO8	2.72e-08	5.36159	5.36324	0.393614	0.042775
ARHGAP15	2.72e-08	5.25729	5.83679	0.537496	0.198475
ELAC2	2.72e-08	41.1374	41.9291	21.0715	19.5899
RP11_350J20.5	2.72e-08	0.168036	0.163445	0.0138256	0.009835
RP11_89K11.1	2.72e-08	2.32711	1.89339	0.0739175	0.04637
RP3_406P24.3	4.08e-08	0.346636	0.29809	0.0251381	0.01689
ZNF45	4.08e-08	5.25621	5.26143	1.2498	1.36841
PCMT1	4.08e-08	26.5692	26.0542	42.0937	38.811
RBM19	4.08e-08	10.6689	9.87164	2.57394	1.68138
TRABD2A	4.08e-08	0.361192	0.07218	12.7082	7.15371
ACKR4	4.08e-08	0.341792	0.158305	0.0277412	0.019375
BLOC1S6	4.08e-08	15.4997	16.1949	2.92474	1.84976
GJC3	4.08e-08	0.0597783	0.061045	0.0066669	0.00604
FAM175B	4.08e-08	9.93622	9.52915	21.2373	20.7955
RN7SL5P	4.08e-08	10.902	9.33083	2.79617	2.32998
ZNF565	4.08e-08	0.883259	0.958675	0.205638	0.143895
KIAA0319L	4.08e-08	6.15085	5.26387	26.8355	23.4402
TMEM186	4.08e-08	1.78818	1.69189	0.443508	0.364645
CKB	4.08e-08	2.67605	0.77166	0.122404	0.102995
TRIM17	4.08e-08	0.281149	0.23799	0.927254	0.896235
MDM1	4.08e-08	6.47615	5.8829	0.466906	0.084085
RP11_227D13.4	4.08e-08	0.200726	0.18659	1.23873	0.89816
RP11_394I13.2	4.08e-08	0.283375	0.268245	0.0443912	0.029425
CGRRF1	4.08e-08	3.73135	3.57255	1.03213	0.88245
RRN3P2	4.08e-08	2.27791	1.98938	0.356636	0.11526
SERTAD3	4.08e-08	2.88194	2.43475	11.7481	11.5955
C1orf198	4.08e-08	4.5789	3.41734	0.244906	0.044015
LOX	4.08e-08	0.128544	0.10107	1.30101	0.792845
MAP3K6	4.08e-08	1.46196	1.29007	6.51592	6.09553
RP11_432J22.2	6.08e-08	0.608645	0.55156	0.0966825	0.06669
GOLGA4	6.08e-08	4.94458	5.27505	0.321134	0.0504
ZNF248	6.08e-08	2.69184	2.59765	0.519347	0.181865
LOXL3	6.08e-08	1.25721	0.622415	0.0614112	0.035525
RP11_286H14.6	6.08e-08	6.43418	5.63386	0.635538	0.087095
RP11_538P18.2	6.08e-08	1.83503	1.66749	0.460902	0.30643
FAM126A	6.08e-08	9.81925	8.37369	1.09151	0.35269
RP11_499P20.2	6.08e-08	2.43702	2.20891	0.431966	0.22811
KATNBL1	6.08e-08	4.61027	4.30234	8.10286	7.94282
CTC_453G23.5	6.08e-08	8.40706	8.52541	2.8842	3.04808
C11orf57	6.08e-08	4.97794	5.09661	0.869317	0.17687
RP5_1125A11.1	6.08e-08	0.669777	0.506845	2.47052	2.22055
FCRLA	6.08e-08	22.1754	8.70378	0.0528356	0.024475
PPFIA1	6.08e-08	6.9936	6.84922	1.33966	0.156695
HLA_DPA1	6.08e-08	93.2997	78.443	4.08627	0.131435
ZNF296	6.08e-08	8.00051	6.54453	26.1904	24.872
FAM45B	8.8e-08	3.34353	3.19976	0.788382	0.63043
ZCCHC7	8.8e-08	67.0349	72.7509	9.3236	8.84672
TRGV1	8.8e-08	0.640397	0.549	2.50436	2.4951
TMEM62	8.8e-08	5.15257	4.8974	0.976669	0.43256
ZNF644	8.8e-08	7.83242	7.89549	19.4882	19.5462
AC009948.7	8.8e-08	0.386489	0.39019	0.0401306	0.020065
KCND1	8.8e-08	0.736837	0.56609	0.198126	0.20312
RP11_299J3.8	8.8e-08	10.9884	11.3876	4.00646	3.77431
CTC_297N7.8	8.8e-08	4.46078	4.73476	0.659305	0.30135
GAB1	8.8e-08	16.3381	11.0764	0.71293	0.27397
S'MARCE1	8.8e-08	13.8578	15.1296	2.67748	2.2553
EAF2	8.8e-08	12.913	12.7056	2.77959	2.31221
COQ10B	8.8e-08	5.24706	5.33458	0.426181	0.08503
FBXL4	8.8e-08	3.86209	3.2965	0.434452	0.195595
TRIM2	8.8e-08	0.965661	0.4737	0.05208	0.030955
OLFM2	8.8e-08	0.0512489	0.04302	1.05646	0.38478
KLHL5	8.8e-08	5.84486	5.77715	1.16727	0.63698
RP3_400B16.4	8.8e-08	3.55534	3.35262	0.573159	0.095355
SMYD5	8.8e-08	9.30526	8.97162	1.1075	0.126205
ACSF2	8.8e-08	8.77856	8.72609	1.55892	1.40606
IL11	8.8e-08	0.110672	0.068305	0.0095369	0.00824
RN7SL731P	1.26e-07	1.50347	1.3814	0.187661	0.087795
VPREB3	1.26e-07	208.326	177.234	0.376402	0.275045
RP11_415F23.2	1.26e-07	0.623356	0.664925	0.141879	0.09333
JKAMP	1.26e-07	10.0424	9.72754	2.21619	1.64318
PFKFB1	1.26e-07	0.178059	0.13202	0.032215	0.019965
CTD_2647L4.4	1.26e-07	4.96354	4.63462	0.579074	0.266895
RP11_265N6.3	1.26e-07	0.273753	0.282685	0.0336344	0.019945
RPS2P32	1.26e-07	0.948386	0.788615	0.0446931	0.02569
RP5_821D11.7	1.26e-07	3.48389	3.19612	7.74331	6.69668
GRSF1	1.26e-07	17.5417	17.1955	29.3525	27.9987
PTPDC1	1.26e-07	2.10789	2.03544	0.595233	0.485705
LAT2	1.26e-07	104.857	109.18	4.98036	0.52087
HLA_DRA	1.26e-07	764.415	577.504	17.361	0.5572
ZNF133	1.26e-07	1.90031	1.88308	4.36476	4.02567
RP4_800J21.3	1.26e-07	5.44559	5.05185	0.865182	0.68805
WIPF2	1.26e-07	7.083	7.06271	2.30225	2.24636
PDE12	1.26e-07	5.74281	5.99591	9.7434	9.34308
NPIPA2	1.26e-07	3.51526	3.83006	0.760011	0.551125
RP11_458N5.1	1.26e-07	1.15886	0.717335	0.0548125	0.02522
CLEC2D	1.26e-07	33.1381	33.2668	5.67561	4.58871
CISD3	1.26e-07	8.70006	8.61946	37.843	36.2083
EEF1A1P24	1.26e-07	0.0496028	0.035435	0.389727	0.386415
RP11_806L2.2	1.77e-07	0.191462	0.158045	0.0067619	0.00589
PLCG2	1.77e-07	23.8258	21.8631	2.86155	1.48801
INPP5K	1.77e-07	9.24392	8.4331	22.2463	22.1904
AC040173.1	1.77e-07	3.87322	3.71428	8.70499	9.12298
LINC00852	1.77e-07	1.2839	1.19613	5.15771	5.20805
OXCT1_AS1	1.77e-07	4.29756	3.80451	0.400562	0.054875
SLC22A5	1.77e-07	1.31939	0.595265	0.0609156	0.015475
RP5_837I24.1	1.77e-07	0.616999	0.26925	0.0497188	0.037345
TPM1	1.77e-07	1.41463	1.14508	0.162211	0.061765
LGALSL	1.77e-07	1.01246	0.56656	0.0296212	0.00263
UCP3	1.77e-07	0.803082	0.68064	0.0751731	0.02284
TPRN	1.77e-07	9.14102	7.7119	3.4605	3.15317
BMS1P20	1.77e-07	1.72825	1.35595	0.180452	0.04299
CTD_2410N18.3	1.77e-07	0.179968	0.126545	0.0121588	0.010075
RBM25	1.77e-07	41.1206	42.3321	5.53835	0.42142
C19orf71	1.77e-07	2.5275	2.27287	0.444671	0.285915
RP11_33N16.3	1.77e-07	6.69705	6.65416	1.83573	1.92958
PRICKLE4	1.77e-07	1.9788	1.30591	0.216741	0.092115
CSNK1A1	1.77e-07	22.5114	23.9865	36.2595	35.5453
RPP38	1.77e-07	1.92588	2.004	0.333919	0.087095
FAM227B	1.77e-07	0.606173	0.6123	20.2606	20.7409
DHRS13	1.77e-07	9.19617	9.35377	1.48467	0.277435
RAD21	2.47e-07	76.1324	77.7069	182.634	178.992
ZNF574	2.47e-07	8.45637	8.27754	29.0139	26.5575
TJP3	2.47e-07	0.181804	0.04908	14.5955	6.70266
RP11_188P20.3	2.47e-07	4.048	4.26328	11.2564	11.7775
RP11_391M20.1	2.47e-07	1.52068	1.50135	0.255043	0.08117
PDXP	2.47e-07	1.89183	1.72917	4.76325	4.20662
RP11_430C7.5	2.47e-07	0.797628	0.37328	5.09845	4.67713
ZNF554	2.47e-07	1.37982	1.14156	0.224009	0.11152
HLA_DMA	2.47e-07	36.3045	29.2633	2.88716	1.45118
TCN2	2.47e-07	0.473576	0.15032	0.0332706	0.02388
CD226	2.47e-07	0.264102	0.093505	25.9978	23.718
HLA_K	2.47e-07	2.62198	1.47866	0.126362	0.014685
ICA1L	2.47e-07	0.845709	0.60268	0.0618706	0.015075
RP11_578F21.12	2.47e-07	0.423027	0.42359	30.0798	23.0603
RP11_713N11.4	2.47e-07	84.6043	69.1225	7.72741	5.67695
ERCC5	2.47e-07	9.57459	9.13875	1.24016	0.18594
TAS2R19	2.47e-07	0.260937	0.17992	3.8036	4.03294
HLA_DRB5	2.47e-07	66.871	3.04321	0.589601	0.07019
BIK	2.47e-07	4.32218	2.13549	0.0587781	0.034225
CDKN1A	3.39e-07	47.2625	36.8359	4.83589	0.95581
CAMSAP2	3.39e-07	4.04217	3.27022	0.325712	0.019655
POLG2	3.39e-07	9.22282	9.29908	3.46407	3.48674
C2orf81	3.39e-07	0.706378	0.55574	3.02529	3.07115
LRMP	3.39e-07	182.618	140.623	18.3453	14.8746
AC009120.3	3.39e-07	3.30792	3.49281	10.4336	9.41338
TIMM21	3.39e-07	10.165	9.07073	3.94235	3.75951
DNAH17	3.39e-07	0.390805	0.058835	21.144	0.72636
TMEM64	3.39e-07	3.5385	3.69571	0.532202	0.31267
RP11_28F1.2	3.39e-07	1.30352	0.883025	0.136859	0.105175
NPIPB7	3.39e-07	0.440888	0.22156	4.0166	2.34983
LACE1	3.39e-07	0.730488	0.691355	0.158448	0.12329
RNA5S12	3.39e-07	0.697164	0.557605	0.15043	0.106415
AGPAT9	3.39e-07	1.07195	0.08322	0.0126869	0.0101
DIAPH2	3.39e-07	2.17044	2.38775	9.7181	8.36171
RP11_656D10.5	3.39e-07	8.17923	8.84797	15.2754	13.8732
BATF3	3.39e-07	2.57824	1.75283	0.162154	0.01616
CTB_41I6.1	3.39e-07	0.759666	0.66748	0.0516925	0.005985
KLHL28	3.39e-07	1.88707	2.08008	0.463058	0.447885
HDAC5	3.39e-07	21.8759	22.3818	7.38492	5.97227
RP11_1334A24.6	3.39e-07	18.484	15.7539	0.753777	0.367635
NFS1	3.39e-07	5.12689	4.1875	1.4817	1.47813
HHLA3	3.39e-07	5.3205	4.93804	0.859649	0.267625
NDST1	3.39e-07	8.7536	8.59511	20.3925	17.4227
WASF4P	3.39e-07	1.61345	1.34886	6.47926	5.44929
PUS3	3.39e-07	4.9265	4.30958	0.462357	0.132345
FAM105B	3.39e-07	8.53382	8.02693	25.0821	23.2404
RFESD	3.39e-07	0.264036	0.268405	0.045345	0.01428
APOL3	3.39e-07	8.91479	7.85331	26.202	19.632
APPBP2	3.39e-07	4.11705	4.17091	1.63363	1.48832
JAM3	3.39e-07	0.521501	0.07093	12.2321	8.13746
RP11_166O4.5	4.61e-07	0.643082	0.6095	0.0695812	0.023625
ECI1	4.61e-07	18.7714	16.1507	4.42377	1.79093
RP11_950C14.3	4.61e-07	10.6554	10.9837	1.25602	0.27266
RP11_1415C14.4	4.61e-07	7.22764	8.04003	0.886801	0.183315
KIAA0930	4.61e-07	13.0568	13.21	4.86937	5.07303
RP11_649A18.12	4.61e-07	6.57092	6.25867	2.09352	1.3413
GPX1	4.61e-07	113.102	82.5054	25.618	22.7132
EDEM2	4.61e-07	7.18889	6.18656	28.4174	26.1495
C18orf25	4.61e-07	7.61413	6.28669	0.937406	0.38959
CNOT4	4.61e-07	3.14691	3.09837	9.89043	9.53677
POLR3F	4.61e-07	5.57805	5.87337	0.980194	0.07563
ABHD17AP6	4.61e-07	0.293326	0.256175	0.0505562	0.027455
U2AF1L4	4.61e-07	1.17233	1.02039	0.267316	0.23555
IRF7	4.61e-07	12.9345	8.85633	3.26205	3.23189
AC083873.4	4.61e-07	2.43015	2.3772	0.426822	0.115055
RP4_635E18.7	4.61e-07	5.68151	5.77813	1.39131	0.47153
KIAA0040	4.61e-07	17.0881	14.4228	3.41047	3.03715
RP3_322G13.5	4.61e-07	0.383041	0.362185	1.10624	1.0174
EBF1	4.61e-07	37.1612	40.1363	0.821034	0.080355
AC008937.3	4.61e-07	0.363088	0.383615	1.4991	1.24655
STIL	4.61e-07	10.5578	10.4667	21.241	19.2991
PGK1P2	4.61e-07	0.108131	0.093695	1.42186	0.55836
RPSAP9	4.61e-07	5.62712	5.05424	13.8707	12.5098
SH2B3	4.61e-07	10.808	10.2486	0.906021	0.04395
METTL6	4.61e-07	2.1631	1.99252	4.33311	4.17162
RP11_104H15.9	4.61e-07	0.658237	0.509515	0.0769588	0.00921
RP1_232L22__B.1	4.61e-07	4.6163	4.31149	0.893474	0.344845
NAT6	4.61e-07	4.68968	4.03432	1.25157	0.89725
ZBTB43	4.61e-07	2.85247	2.85467	0.290114	0.028135
DOK3	4.61e-07	58.9924	59.0052	2.52932	0.93029
ZNF333	6.21e-07	2.17989	2.20405	5.31566	4.80288
TOMM40L	6.21e-07	4.38668	3.64299	14.3559	9.78049
MGST3	6.21e-07	6.25758	5.71599	0.898386	0.306635
RP11_15H20.6	6.21e-07	1.5374	1.56998	3.04522	3.11006
PSEN2	6.21e-07	3.55214	0.56216	0.0828444	0.06448
CHMP3	6.21e-07	3.6294	3.55173	5.95496	5.9259
BLNK	6.21e-07	67.6968	77.4146	0.363554	0.074615
CD19	6.21e-07	106.228	101.81	0.297481	0.090575
PRX	6.21e-07	1.47419	0.819465	0.0445069	0.04168
HLA_DRB1	6.21e-07	127.986	49.4465	3.21936	0.173185
SNX2	6.21e-07	52.7481	55.735	15.0778	14.4829
RP11_339B21.9	6.21e-07	14.095	13.0808	28.4873	26.0298
KRBA1	6.21e-07	3.14762	3.15793	0.0324019	0.02501
BOLA2B	6.21e-07	11.3023	8.71434	2.96815	1.95061
LINC00957	6.21e-07	1.96364	1.87559	0.245847	0.017945
ZFPM1	6.21e-07	0.949664	0.841935	0.0480588	0.02952
PTPRVP	6.21e-07	0.0986417	0.05776	0.0056731	0.004195
SKA1	6.21e-07	11.0877	10.406	4.41857	4.22515
PIK3AP1	6.21e-07	66.1778	76.1978	2.82797	0.461415
HINT3	6.21e-07	5.87026	6.33622	2.39634	2.31447
ZNF16	6.21e-07	3.19637	3.00445	0.298554	0.02984
RHOT1P1	6.21e-07	0.463202	0.339405	0.0657188	0.05716
RP3_521E19.2	6.21e-07	0.861261	0.786025	0.0785413	0.03645
ZNF530	6.21e-07	3.1504	3.0738	9.95897	9.58427
RP11_362K14.5	6.21e-07	3.12827	3.28002	7.27152	6.343
RP11_546B15.2	6.21e-07	0.373126	0.345085	0.09074	0.06313
FBXW2	6.21e-07	9.68916	9.75475	2.14659	1.24883
ZFAND6	6.21e-07	15.5879	15.7151	2.27704	0.141375
DUSP22	6.21e-07	10.3437	7.54692	3.21742	3.28545
RP11_303E16.3	6.21e-07	0.242931	0.23645	0.0464688	0.03014
AP001258.4	7.32e-07	1.72414	1.75099	0.0175044	0.013625
CTC_444N24.6	7.32e-07	0.577141	0.450735	0.037675	0.020075
AC104655.2	7.32e-07	9.23496	8.5688	0.0119544	0.009755
APOL6	7.32e-07	6.02473	5.6524	0.0262581	0.01695
RP11_77K12.8	7.32e-07	4.50957	4.48243	0.0670031	0.016335
RP11_216B9.6	7.32e-07	3.00787	2.68675	0.0204588	0.014125
MAFF	7.32e-07	1.99816	1.12146	0.0121356	0.012295
RP11_697E22.2	7.32e-07	2.02149	1.88675	0.0057738	0.00441
PPM1K	7.36e-07	7.3722	6.52932	0.0864588	0.046645
CTC_429P9.3	7.36e-07	4.45373	4.47576	0.0332638	0.03181
ABCB9	7.36e-07	0.891146	0.955205	0.0326369	0.01318
DGUOK_AS1	7.36e-07	7.88678	7.10743	0.47418	0.06328
ZNF510	7.36e-07	3.97042	4.21853	0.0107519	0.007895
ZNF619	7.36e-07	2.09679	2.41148	0.0265356	0.017065
ZKSCAN3	7.36e-07	2.50346	2.73286	0.0152856	0.00816
TRIM66	7.36e-07	2.55856	1.92834	0.0223256	0.019995
USP18	7.36e-07	6.0341	2.35842	0.0554919	0.039585
RP11_529H20.6	7.36e-07	0.422591	0.37561	0.0105531	0.005755
AUNIP	7.36e-07	6.88142	6.11977	0.0981419	0.05066
SEMA4G	7.36e-07	0.567227	0.51962	0.0192606	0.01161
RP13_228J13.5	7.36e-07	1.17147	1.14922	0.073	0.031065
RP11_169K16.6	7.36e-07	0.283824	0.28845	0.0076681	0.004245
PLD6	7.36e-07	5.25274	5.35899	0.0174325	0.00946
RP11_467D6.1	7.36e-07	0.262453	0.266295	0.0178412	0.01811
RHOC	7.36e-07	10.8335	7.64332	0.132623	0.054
FXN	7.36e-07	6.8807	5.97924	0.0160094	0.0069
ATMIN	7.36e-07	9.47469	9.4117	0.295494	0.023825
CENPP	7.36e-07	3.30231	3.1684	0.278143	0.133445
ZNF345	7.36e-07	1.50778	1.59568	0.0388738	0.022705
GDE1	7.36e-07	10.4546	9.7059	0.100654	0.06285
COL5A2	7.36e-07	0.309773	0.23747	0.0129481	0.01033
RP11_53O19.3	7.36e-07	2.16058	1.80544	0.0152794	0.010355
S'MARCAL1	7.36e-07	8.3543	8.26318	0.904952	0.294615
RP11_15J10.1	7.36e-07	4.66562	5.06584	0.137602	0.02739
RP3_477O4.14	7.36e-07	4.01086	4.22012	0.05055	0.04058
RP11_115C21.2	7.36e-07	0.787082	0.64815	0.0988044	0.08013
LRRC8D	7.36e-07	0.392382	0.303115	0.0107388	0.00585
SENP3_EIF4A1	7.36e-07	43.6953	42.4351	0.203756	0.02814
FBXW4	7.36e-07	6.34077	5.80551	0.0770675	0.015635
EFCAB8	8.3e-07	0.0299078	0.02686	0.692122	0.06837
MET	8.3e-07	0.731015	0.12824	0.842012	0.742405
AC073236.3	8.3e-07	0.335085	0.124955	0.592369	0.56628
CDC42EP1	8.3e-07	2.26523	0.07537	3.0884	2.49641
PART1	8.3e-07	0.283399	0.07537	0.761938	0.648365
PDGFRA	8.3e-07	2.49748	0.006445	3.73389	3.80658
CPA4	8.3e-07	0.877417	0.083505	1.10621	1.18146
GTF2IRD2	8.3e-07	3.71102	3.29094	0.587471	0.02984
LRP2	8.3e-07	0.253214	0.00477	0.334657	0.258585
MTMR11	8.3e-07	0.549464	0.04478	0.616124	0.5542
NRBF2P5	8.3e-07	0.325597	0.331955	2.50261	2.42519
AC141586.5	8.3e-07	2.43672	2.63735	9.99967	6.82662
C16orf86	8.3e-07	2.08337	2.07946	0.261663	0.097285
FEZ1	8.3e-07	2.52733	0.037885	5.29685	4.53973
SMTNL1	8.3e-07	0.772635	0.5393	0.0884956	0.011625
CHST15	8.3e-07	37.3928	26.9605	0.328515	0.074495
RP11_284F21.9	8.3e-07	1.3751	0.018045	1.95497	1.64628
RP11_529J17.3	8.3e-07	9.01321	0.497765	17.6079	17.379
CCDC50	8.3e-07	12.1064	10.0377	1.82974	0.092915
BMP7	8.3e-07	3.13023	0.023705	3.30462	3.54424
AMMECR1L	8.3e-07	9.76614	10.0687	24.8383	25.6111
MYO1A	8.3e-07	0.0526061	0.03533	0.627082	0.3643
ACTR3C	8.3e-07	0.377	0.27906	0.0308075	0.00668
SNORA4	8.3e-07	3.20476	3.18824	0.0640338	0.04431
ERP27	8.3e-07	1.14426	1.06082	0.141712	0.114155
STYK1	8.3e-07	0.188856	0.03327	7.35258	5.52789
COG7	8.3e-07	5.72119	5.99118	8.61791	8.27627
LEPREL2	8.3e-07	0.307045	0.0209	1.42911	1.16475
RP11_689P11.2	8.3e-07	0.118328	0.0871	0.0241669	0.01307
TMEM98	8.3e-07	0.565187	0.019275	0.669779	0.532075
H2AFY2	8.3e-07	3.68763	0.047945	1.55062	0.654835
GJB2	8.3e-07	7.71787	0.03907	8.79054	7.88934
RP4_714D9.5	8.3e-07	0.303256	0.282085	0.0533769	0.024385
SDPR	8.3e-07	0.399429	0.02053	0.555276	0.491595
LAMA2	8.3e-07	0.503038	0.07979	0.828304	0.70891
RFK	8.3e-07	8.22709	7.53277	19.1022	19.0482
LAD1	8.3e-07	0.405524	0.05689	0.50213	0.4968
AC123788.1	8.3e-07	5.39297	5.57757	1.06458	0.227005
MTND5P11	8.3e-07	1.29123	0.48811	4.08533	4.14643
PPARG	8.3e-07	0.248402	0.02612	0.27138	0.220305
C19orf26	8.3e-07	0.162232	0.080685	12.1623	2.09629
WDFY4	8.3e-07	12.7227	11.836	0.094005	0.046465
IL32	8.3e-07	10.2038	0.181535	11.3027	10.8951
FIGN	8.3e-07	0.157574	0.00712	0.175034	0.146755
PTN	8.3e-07	2.09352	0.03266	2.46664	2.37068
RP11_320M16.1	8.3e-07	0.427468	0.32578	0.05061	0.044325
CLDN4	8.3e-07	1.88377	0.16342	2.99913	2.97554
S1PR2	8.3e-07	2.0382	1.6844	0.253628	0.13276
ZNF268	8.3e-07	1.11982	1.12272	0.0126719	0.007795
SLC35A3	8.3e-07	4.21323	4.33936	1.09897	0.82768
JSRP1	8.3e-07	10.9512	0.079355	11.9272	12.4351
CYP1B1	8.3e-07	1.38539	0.06361	1.98011	1.95669
CCNI2	8.3e-07	0.587924	0.091215	0.868337	0.798495
NUBP1	8.3e-07	22.1335	22.3728	11.5176	11.1411
ATXN7L1	8.3e-07	1.65851	1.57634	0.0614638	0.03943
KRT8	8.3e-07	5.57822	1.52583	10.1548	9.04068
UBBP4	8.3e-07	2.03929	0.7589	2.99262	2.70191
IGHV4_34	8.3e-07	4.77094	0.43433	5.90071	5.64786
PRODH	8.3e-07	0.309684	0.03198	0.459304	0.47538
GLIPR2	8.3e-07	4.62403	0.97713	28.3646	25.5264
RP11_245P10.6	8.3e-07	0.123302	0.067575	1.76823	1.2209
AZGP1	8.3e-07	1.21472	0.028075	1.41113	1.46117
PTAFR	8.3e-07	1.29806	0.154205	1.35144	1.22942
PKD2L2	8.3e-07	0.0653106	0.02697	1.56672	0.64337
ROPN1L	8.3e-07	0.798233	0.03492	2.64486	1.96482
CD4	8.3e-07	9.69403	0.021265	12.4033	8.91813
HIST1H4E	8.73e-07	1.22652	1.00097	0.0316506	0.008195
DYRK4	8.78e-07	1.53722	1.3786	0.0245837	0.009085
RP11_732M18.3	8.78e-07	2.04499	2.00146	0.0659244	0.042305
TAGAP	1.04e-06	2.36403	1.9686	0.06126	0.026665
PAQR8	1.05e-06	3.9557	4.10116	0.0900106	0.00568
ARV1	1.1e-06	8.93235	7.99258	2.70028	2.11995
NCAN	1.1e-06	0.168005	0.005755	0.231873	0.215175
RP11_872D17.4	1.1e-06	42.6317	41.5793	24.2911	22.8186
RP11_498E2.8	1.1e-06	0.832756	0.75632	0.239872	0.19498
RP11_1023L17.1	1.1e-06	2.41172	2.31149	0.537672	0.40677
CTB_113P19.5	1.1e-06	0.658684	0.44543	0.0905625	0.009515
MURC	1.1e-06	0.853952	0.70573	2.94785	2.49866
SMIM7	1.1e-06	2.53421	2.3642	0.511487	0.055615
LIMS1	1.1e-06	9.92486	9.65387	18.2814	18.8048
RP11_490O6.2	1.1e-06	1.86653	1.25826	3.43789	3.44292
CCS	1.1e-06	14.4931	13.1591	4.55103	3.3438
ZNF525	1.1e-06	2.28501	2.42553	9.65338	8.02636
COL2A1	1.1e-06	0.13264	0.00679	0.274103	0.197245
CTSS	1.1e-06	18.6345	12.1176	2.65457	1.00755
MYO15B	1.1e-06	7.10797	5.07439	31.5663	34.635
LYRM7	1.1e-06	7.33427	7.57388	15.11	15.0868
TSPAN11	1.1e-06	0.252641	0.0403	0.52631	0.315665
UNC13D	1.1e-06	11.5116	10.5901	42.5842	38.2234
PRLR	1.1e-06	0.145418	0.00832	0.244893	0.22515
RP1_1J6.2	1.1e-06	6.04063	5.81405	2.08423	1.84013
NUP88	1.1e-06	37.0101	36.7718	22.5239	22.6621
HIST1H3E	1.1e-06	0.899421	0.42047	0.114614	0.04744
TFAP4	1.1e-06	14.3116	14.576	3.067	0.660185
RTN2	1.1e-06	2.11655	1.8959	0.323125	0.24436
SPRY3	1.1e-06	0.249159	0.246625	0.0409569	0.01527
IGSF10	1.1e-06	3.96174	0.007035	3.47794	3.02838
CYB561	1.1e-06	1.38378	0.59401	0.04754	0.04043
LPHN2	1.1e-06	1.94606	0.03246	2.35385	1.7626
PDE4DIP	1.1e-06	2.38641	2.25693	0.516313	0.325145
IRF4	1.1e-06	59.0804	31.8292	20.7016	0.08581
DYSF	1.1e-06	6.36526	0.44946	18.5845	15.1463
FTH1P10	1.1e-06	3.45831	2.58907	0.663467	0.08093
ATP6V1E2	1.1e-06	0.931267	0.860355	0.110391	0.00694
HLA_DOA	1.1e-06	24.9504	20.0481	1.50676	0.06631
PRPH2	1.1e-06	0.274988	0.012065	0.646949	0.40275
INSR	1.1e-06	16.4766	16.6537	3.72834	4.29885
ZDHHC12	1.1e-06	8.71245	7.6158	2.38609	1.69832
PRSS8	1.1e-06	0.0882456	0.094545	0.0218844	0.011815
CD79B	1.1e-06	208.198	157.22	8.71889	5.98718
KRT19	1.1e-06	1.15533	1.15577	0.228909	0.06176
AC097533.1	1.1e-06	1.03635	1.00371	0.425159	0.418905
HEXIM2	1.1e-06	4.02726	3.4544	7.07148	6.7728
WFS1	1.1e-06	3.88062	3.02373	10.8996	10.6404
ARPC5L	1.1e-06	30.8421	28.8898	16.4764	15.1525
RNU1_4	1.1e-06	2.57668	1.86745	0.388489	0.026555
ELOVL4	1.24e-06	0.0217294	0.01035	17.3167	12.2121
EHBP1	1.24e-06	5.37319	5.31064	0.290414	0.021195
RP11_571L19.8	1.24e-06	0.506686	0.507275	0.0637406	0.05256
AMH	1.24e-06	2.52984	1.8343	0.0542212	0.037
ITGA3	1.45e-06	0.890697	0.40069	0.407232	0.01668
C1orf131	1.45e-06	6.58993	6.03928	8.21349	0.10741
LCK	1.45e-06	16.4792	12.2172	172.175	153.276
FZD3	1.45e-06	1.27219	1.04518	0.186246	0.05601
ZBTB21	1.45e-06	3.57896	2.58641	1.13406	0.00758
GAPDHS	1.45e-06	0.827941	0.73537	6.18013	6.5754
BRPF1	1.45e-06	14.1402	15.3522	12.9362	0.23693
RPL36A	1.45e-06	1.00134	0.739575	0.685526	0.037395
COL4A2	1.45e-06	0.72895	0.145495	1.21872	1.25513
AC092171.4	1.45e-06	2.47226	2.16583	0.470978	0.016885
TMCO6	1.45e-06	8.22153	9.29272	1.67771	0.032765
ZNF132	1.45e-06	0.684809	0.60443	0.389505	0.016045
DCUN1D2	1.45e-06	6.43251	5.71523	2.94962	0.27341
ZAP70	1.45e-06	24.619	19.6611	114.517	111.472
ELMO3	1.45e-06	2.3131	2.16389	0.409308	0.027225
ERCC8	1.45e-06	3.45866	3.22844	21.2056	22.7238
CHMP6	1.45e-06	11.4193	10.2699	6.44365	6.88847
FAM83F	1.45e-06	0.0062594	0.00575	0.124384	0.044835
RP11_1017G21.5	1.45e-06	1.05455	0.97319	348.015	304.257
POU2AF1	1.45e-06	21.9474	19.4338	1.47284	1.1947
NBPF9	1.45e-06	3.83492	3.73819	38.5748	44.4885
HSPA12A	1.45e-06	0.667345	0.01272	2.60442	2.31702
RP11_338I21.1	1.45e-06	0.5935	0.611115	0.431083	0.011445
TBC1D10A	1.45e-06	2.54744	2.49375	2.15774	0.114535
CROCC	1.45e-06	2.51812	1.90928	7.11339	6.34276
HERC6	1.45e-06	1.94999	1.40233	0.160591	0.047465
MRPL22	1.45e-06	7.89676	7.44665	1.93269	0.500535
GFOD2	1.45e-06	5.67242	5.37803	1.17124	0.21841
ANKRD61	1.45e-06	0.953591	0.87878	6.21933	4.29049
FN1	1.45e-06	1.62572	1.18035	0.418485	0.092375
PARD6B	1.45e-06	0.477166	0.44079	0.260735	0.02846
TNS4	1.45e-06	0.0439133	0.038315	1.53901	0.437165
RP11_267M23.4	1.45e-06	0.260697	0.236835	1.82509	1.62198
AQP3	1.45e-06	8.48429	0.23052	7.23895	6.60656
RC3H2	1.45e-06	7.04808	7.21709	5.03261	0.783445
DDX39B	1.45e-06	3.13378	2.81755	0.752009	0.02337
TMEM42	1.45e-06	5.68341	5.60081	1.61645	0.03721
UTP11L	1.45e-06	14.6952	14.3588	4.43669	1.34157
DNAH14	1.45e-06	0.0090117	0.007765	0.373874	0.22533
RP11_49I11.1	1.45e-06	0.707286	0.63427	0.378199	0.024435
OPA3	1.45e-06	4.25591	4.18304	1.6852	0.699965
ZKSCAN2	1.45e-06	2.87924	2.93176	43.6156	45.2503
DDHD1	1.45e-06	8.38839	8.93269	3.24112	0.242175
CTC_273B12.5	1.45e-06	1.69066	1.6522	0.35622	0.14332
DTWD1	1.45e-06	4.66205	4.46003	0.917274	0.225165
TOPORS_AS1	1.45e-06	2.51641	2.43728	0.390556	0.019005
MMGT1	1.45e-06	7.8343	7.81295	1.89382	0.513155
CYB561D1	1.45e-06	4.43675	4.54516	3.19974	0.015175
AC083843.1	1.45e-06	1.56566	1.35009	0.155435	0.067085
PLEKHB1	1.45e-06	0.939735	0.851735	2.34368	2.37975
HNRNPCP3	1.45e-06	0.0915406	0.083425	0.486716	0.302415
ELOVL1	1.45e-06	27.3382	25.3484	16.3852	16.6145
RP13_996F3.4	1.45e-06	0.596793	0.567405	1.05438	0.012755
BDH2	1.48e-06	14.2397	15.2538	0.588518	0.028315
PLD4	1.48e-06	16.7493	9.64793	0.0215362	0.014605
SPDYE2	1.48e-06	2.2202	1.59015	0.122592	0.025275
RP11_545E17.3	1.75e-06	5.78584	4.91475	0.32331	0.04328
DPH7	1.76e-06	9.84334	8.7677	0.519512	0.01675
SPI1	1.76e-06	19.7045	18.6521	0.0624262	0.02306
TMPRSS9	1.76e-06	0.484128	0.253815	0.0443644	0.034625
RUFY1	1.76e-06	15.4702	14.6493	1.13688	0.01908
AC005519.4	1.89e-06	2.32376	2.23841	0.381494	0.044425
SOX2	1.89e-06	0.188496	0.0274	0.163628	0.17253
URI1	1.89e-06	14.5618	14.6439	4.92671	1.07797
RP11_119F19.2	1.89e-06	1.54016	1.46216	4.36108	4.43768
FAIM	1.89e-06	21.9721	21.7677	3.41785	1.43327
TNKS	1.89e-06	5.42335	5.40617	1.91959	1.06151
TMEM139	1.89e-06	0.195808	0.168045	0.0491769	0.02614
RP1_178F15.5	1.89e-06	18.6374	14.9286	2.25062	1.89772
CTC_454I21.4	1.89e-06	0.61408	0.552195	0.222416	0.205915
IL2RG	1.89e-06	70.7409	53.8098	231.091	216.658
LRRC20	1.89e-06	8.83165	8.16432	2.08128	0.898935
ZNF814	1.89e-06	2.31088	2.46518	0.543274	0.222485
CTD_2643K12.1	1.89e-06	0.31689	0.310935	0.0564975	0.0183
CACNA2D1	1.89e-06	1.09812	0.012	2.24802	2.17063
SLC17A9	1.89e-06	26.3417	27.0694	5.18683	1.25384
POTEE	1.89e-06	0.162408	0.020335	0.507168	0.442755
ADAMTS15	1.89e-06	0.180177	0.014835	0.201064	0.127035
C1orf56	1.89e-06	0.532587	0.24823	0.557342	0.023925
ZNF507	1.89e-06	7.07671	6.87596	1.34338	0.10415
TEX14	1.89e-06	0.859856	0.05062	1.1112	1.17248
OXSR1	1.89e-06	16.6334	17.4241	28.6206	27.3827
C2orf42	1.89e-06	3.36935	3.45037	5.29376	4.95538
HECA	1.89e-06	7.51659	8.0179	1.44335	0.422845
DCUN1D4	1.89e-06	3.97343	4.13077	1.39864	1.15637
AVIL	1.89e-06	0.365663	0.253105	0.0557519	0.021105
RP11_261C10.5	1.89e-06	3.85747	3.22226	0.62794	0.082285
TRPC4AP	1.89e-06	39.3951	39.9977	74.9382	71.2185
ZNF2	1.89e-06	1.40025	1.38923	0.247306	0.037655
PRDX1	1.89e-06	941.985	999.28	255.817	222.469
QRSL1	1.89e-06	25.9258	23.2868	6.95143	6.55628
AC002056.3	1.89e-06	2.50884	2.56026	1.22619	1.1978
AC093616.4	1.89e-06	4.75343	4.61533	2.38355	0.355485
CTD_2611O12.6	1.89e-06	1.07241	1.05255	0.318829	0.01257
FPGS	1.89e-06	52.6758	54.7058	18.2844	16.147
ZNF767	1.89e-06	7.76385	8.34285	1.76526	0.31104
RBM26_AS1	1.89e-06	0.642905	0.549775	1.49507	1.31499
STXBP1	2.08e-06	3.1569	2.46638	0.0523	0.040375
LYSMD1	2.09e-06	2.51121	2.26673	0.140287	0.0067
ZNF678	2.45e-06	2.42265	2.02598	1.49828	0.092095
RP11_537A6.9	2.45e-06	2.60033	2.20688	14.4225	12.6565
SNORA25	2.45e-06	1.16785	0.9346	0.192043	0.04506
ZSCAN5A	2.45e-06	1.19455	1.114	2.3206	2.02035
VPS4A	2.45e-06	42.4815	38.8091	21.7973	21.1226
RP11_284F21.10	2.45e-06	2.38309	0.032285	2.96489	2.51002
ADAM32	2.45e-06	0.154075	0.031905	1.09971	0.20976
RP11_506M13.3	2.45e-06	0.513941	0.498495	0.168717	0.040375
TRUB2	2.45e-06	17.3285	16.3041	10.8106	11.5683
USP44	2.45e-06	0.0521794	0.014725	10.9474	5.73989
EGR2	2.45e-06	2.60826	0.28706	0.03797	0.02548
NUTM2B	2.45e-06	0.432669	0.37073	1.75444	1.64803
CTC_471F3.6	2.45e-06	0.889967	0.88246	0.311904	0.061875
RP11_1148L6.5	2.45e-06	3.96598	3.71606	1.00477	0.034375
GBP3	2.45e-06	3.2554	2.43443	9.39849	9.08102
BAGE2	2.45e-06	0.744963	0.024185	1.49327	0.98459
LINC00937	2.45e-06	0.114469	0.079555	0.0203106	0.016085
PTP4A2	2.45e-06	39.6653	39.4879	135.612	143.468
PIGHP1	2.45e-06	0.666856	0.65364	2.37017	2.07133
KCTD9	2.45e-06	9.93249	10.3302	15.519	16.3853
PNMAL1	2.45e-06	0.252061	0.018435	0.309034	0.271475
EVL	2.45e-06	17.0885	13.5292	69.2711	50.2926
GS1_393G12.14	2.45e-06	0.530974	0.50294	0.174161	0.033555
PPP2CB	2.45e-06	10.4776	10.6127	3.55183	2.50279
LYN	2.45e-06	25.0622	26.3374	4.01774	0.15632
STAT5B	2.45e-06	24.3795	26.2726	64.4076	54.012
ZNF513	2.45e-06	5.88776	6.20229	7.8213	0.75876
AC090425.1	2.45e-06	0.972118	0.913375	0.165864	0.022685
RP11_378J18.3	2.45e-06	0.559861	0.54214	1.13638	1.17568
APOC1	2.45e-06	0.352949	0.155675	0.0340362	0.02658
RP13_270P17.3	2.45e-06	1.66724	1.4548	14.743	13.5192
ZNF444	2.45e-06	9.01031	8.01302	2.70309	0.09195
AP001469.9	2.45e-06	2.15784	1.84228	0.540467	0.146705
CHORDC1	2.45e-06	9.13723	8.45707	1.63053	0.199165
RP11_207C16.4	2.45e-06	1.79502	1.78564	0.189443	0.05318
CTC_467M3.1	2.46e-06	30.3304	32.1865	0.662907	0.04146
RALGAPA1	2.46e-06	1.74042	1.55024	0.204533	0.11068
CTD_2583A14.8	2.48e-06	3.65425	3.52829	0.282197	0.04639
BMP8A	2.93e-06	0.538443	0.28655	0.0321206	0.01872
CTD_2547H18.1	2.93e-06	0.194214	0.161325	0.02756	0.01574
DPYD	3.15e-06	2.42726	2.05165	0.658847	0.055975
ZFP90	3.15e-06	3.05564	2.97219	0.914121	0.62241
ARMC4	3.15e-06	0.0897217	0.03877	1.42322	0.75824
GPBP1L1	3.15e-06	15.7768	16.107	24.3158	23.2952
XXbac_B444P24.13	3.15e-06	0.805601	0.74866	0.169621	0.122495
ANKRA2	3.15e-06	6.157	5.78505	1.1967	0.293305
ANXA3	3.15e-06	0.502246	0.13757	0.732698	0.727725
Z83851.3	3.15e-06	0.459752	0.32107	0.0631288	0.012025
RP11_227J5.3	3.15e-06	0.207194	0.19231	0.71009	0.65873
RPS24P8	3.15e-06	6.69278	6.60227	3.26962	3.08858
LRIT3	3.15e-06	0.102082	0.084845	0.0209675	0.0145
JUN	3.15e-06	8.06788	2.20991	13.2681	12.2502
OGN	3.15e-06	0.0414711	0.028365	6.38617	3.35216
C11orf49	3.15e-06	3.54575	3.72909	1.4659	0.07376
LGALS4	3.15e-06	0.316412	0.34254	1.10926	0.03785
PRR13	3.15e-06	145.202	134.741	80.8025	80.2021
QDPR	3.15e-06	9.20136	8.49357	27.3714	27.3676
RP11_10N23.2	3.15e-06	1.52781	1.59404	0.285318	0.053215
SH3D21	3.15e-06	1.31067	0.964155	4.44842	3.78056
RP11_706O15.5	3.15e-06	2.22384	1.09974	0.246919	0.11393
NLK	3.15e-06	8.03976	6.8762	1.4594	0.14954
GALNT12	3.15e-06	1.44712	0.31276	0.0244006	0.017115
SYVN1	3.15e-06	39.9903	37.8601	14.0898	13.6369
MCOLN3	3.15e-06	0.106499	0.006235	0.150584	0.138735
ZNF341	3.15e-06	2.05935	1.96779	4.0395	4.12667
S'MARCA1	3.15e-06	0.810022	0.069285	1.42804	1.44233
TNFRSF17	3.15e-06	12.0918	0.74905	0.0596894	0.0485
RP11_309G3.3	3.15e-06	0.364581	0.305795	1.14139	0.89351
USP21	3.15e-06	13.4576	12.8028	25.3407	23.4162
RP11_34P13.13	3.15e-06	0.642261	0.502905	0.129128	0.10901
RP4_730K3.3	3.15e-06	1.12724	0.73888	0.199359	0.10168
ETS1	3.15e-06	19.4074	14.2497	86.7953	72.2058
CCDC69	3.15e-06	55.4772	47.3311	13.7568	9.1931
CTB_113I20.2	3.15e-06	1.91815	1.09617	0.733137	0.01968
C5orf34	3.15e-06	5.91005	5.89764	1.37763	0.54504
NEIL2	3.15e-06	5.25973	4.98965	12.4392	12.6368
THAP5P1	3.15e-06	0.569304	0.490675	0.108366	0.04662
LRP2BP	3.15e-06	0.583677	0.46735	0.103803	0.03117
FAM86JP	3.15e-06	0.913017	0.805745	0.331492	0.09721
SNHG3	3.15e-06	41.2997	40.0011	17.8918	16.3416
SNX13	3.15e-06	2.22046	2.36689	0.56498	0.279455
PHLPP2	3.15e-06	2.42094	2.33694	0.841297	0.847945
TEX9	3.15e-06	1.09491	0.282715	0.0446494	0.031535
SMPD3	3.47e-06	0.130533	0.008435	4.68867	2.07397
NLGN2	3.47e-06	5.27873	3.7822	0.0714244	0.05693
FAM157C	3.47e-06	1.68041	1.40281	0.145394	0.02464
SLC9A3R2	3.47e-06	2.38723	1.22653	0.0360775	0.01169
RP11_395I14.2	4.04e-06	0.524926	0.47411	7.40134	2.43291
SREK1IP1	4.04e-06	5.03621	4.98412	13.8089	11.0481
ZNF136	4.04e-06	4.73411	4.94405	9.3405	8.99086
SLC25A45	4.04e-06	2.70625	1.90021	251.231	68.5995
RP5_1021I20.5	4.04e-06	1.57324	1.64973	0.477585	0.36461
RNF169	4.04e-06	2.78916	3.05829	0.4476	0.01601
PSMC1P5	4.04e-06	6.01086	5.29458	3.29675	3.69099
USP3	4.04e-06	8.42291	8.62684	5.31224	4.4471
ZNF888	4.04e-06	1.14716	1.20915	2.512	2.04732
RAB9A	4.04e-06	10.6863	9.14146	22.9852	18.3008
CTC_471F3.4	4.04e-06	20.1237	20.0326	11.6201	12.1276
XBP1P1	4.04e-06	0.331175	0.30585	0.0692444	0.039645
PTCD3	4.04e-06	14.2115	14.0866	40.3688	39.4052
CTC_398G3.2	4.04e-06	0.157248	0.136795	0.840569	0.518405
RP11_15A1.7	4.04e-06	1.02641	0.99669	0.141506	0.0295
PRKCD	4.04e-06	16.562	12.7855	6.02651	2.27834
CTNNA1	4.04e-06	31.9602	30.1657	8.48553	3.87048
RP11_516A11.1	4.04e-06	0.0632533	0.063955	0.447195	0.009255
AP000240.9	4.04e-06	0.400579	0.317825	1.14102	1.09552
RP11_350N15.6	4.04e-06	0.883023	0.868375	0.177359	0.04249
NIPAL2	4.04e-06	2.97093	2.15571	13.6908	10.7025
RP11_24B19.4	4.04e-06	0.287723	0.231815	0.0986869	0.0426
SERPINA1	4.04e-06	0.37185	0.043345	80.8797	16.8403
TLK2	4.04e-06	9.13234	8.97143	14.839	13.5516
CCDC57	4.04e-06	2.65551	2.29487	6.88641	7.46029
CCDC34	4.04e-06	9.44087	9.7014	2.86416	0.053005
JUP	4.04e-06	69.6432	73.2508	12.4433	3.18139
GLDC	4.04e-06	15.7703	8.78528	1.97156	0.41557
C16orf93	4.04e-06	5.46854	3.3815	14.1204	13.8332
RNU6_395P	4.04e-06	1.09847	1.01601	0.0879056	0.022155
RP11_264B14.1	4.04e-06	1.4147	1.49562	0.624899	0.12166
ICAM3	4.04e-06	16.3468	6.74217	60.7882	52.2178
CTA_363E6.7	4.04e-06	5.97329	5.607	2.96345	2.64432
TCF3	4.04e-06	110.453	104.625	50.0851	49.0466
ZFHX3	4.04e-06	3.56119	3.19304	1.89139	0.164795
RP11_284F21.7	4.04e-06	1.8398	0.044305	2.34082	2.02993
PIP5K1C	4.04e-06	6.06235	5.36676	2.67733	2.84739
ID4	4.04e-06	1.50171	0.02616	4.44814	4.29106
RP11_46C24.6	4.04e-06	0.997016	0.993455	0.367649	0.047605
GLUD1P2	4.04e-06	0.110617	0.0807	0.589986	0.47216
SLC9A3R1	4.04e-06	22.9972	15.1285	115.369	85.552
AC046143.3	4.07e-06	0.884766	0.73857	0.150446	0.113805
CTA_85E5.10	4.07e-06	0.842447	0.75491	0.115263	0.05437
CASS4	4.07e-06	0.015195	0.010835	0.350751	0.13739
TEX29	4.09e-06	0.225622	0.18753	0.01208	0.008125
AP001053.11	4.09e-06	0.380386	0.364765	0.0519244	0.02331
RAMP1	4.83e-06	0.302658	0.0821	2.46525	2.14685
IGSF9B	4.83e-06	0.0269939	0.00255	1.38065	1.25244
HLA_DMB	5.14e-06	26.6661	12.5869	1.02836	0.253845
AC004453.8	5.14e-06	1.21487	1.16784	0.626144	0.049225
PARP1	5.14e-06	169.119	138.271	65.3268	59.4519
AC083884.8	5.14e-06	8.49975	8.8633	2.00585	0.52072
HERC3	5.14e-06	4.52526	4.15395	5.78348	0.347305
CTD_3222D19.5	5.14e-06	0.290122	0.142205	1.50504	1.17361
CTC_246B18.8	5.14e-06	2.59775	2.78819	0.330644	0.167375
GGA2	5.14e-06	30.7834	31.0447	10.1852	5.65743
TMEM120B	5.14e-06	7.43043	7.27473	2.39759	0.77878
AP000254.8	5.14e-06	2.52581	2.27177	7.80089	5.50706
SERINC3	5.14e-06	24.7725	25.1211	39.7487	39.4983
SNUPN	5.14e-06	10.8377	10.785	5.63063	6.08819
MIR3179_2	5.14e-06	0.752317	0.367375	1.04876	1.02418
CADPS2	5.14e-06	1.31412	0.011425	8.9827	6.77401
ERO1L	5.14e-06	11.8258	10.3545	22.231	21.5617
PPIAP6	5.14e-06	0.772529	0.82739	4.15697	3.65649
RTN3	5.14e-06	27.5611	28.1996	48.8763	48.1385
NOP16	5.14e-06	22.4305	21.3163	11.0173	10.3001
BRIX1	5.14e-06	42.1634	40.0998	10.8107	3.33479
ZNF800	5.14e-06	5.63622	5.96132	1.79756	0.668875
LPP	5.14e-06	1.93098	1.76831	5.26396	5.04035
SERBP1P6	5.14e-06	5.34051	5.27403	10.5526	10.6849
NOTCH2NL	5.14e-06	1.57853	1.30093	0.35329	0.25702
RP11_799D4.4	5.14e-06	0.371147	0.277975	3.52449	1.75981
RP11_467L19.8	5.14e-06	3.96205	1.16708	6.9097	6.84847
PINK1	5.14e-06	3.00826	2.68889	0.714141	0.459905
LINC00341	5.14e-06	18.8109	12.7501	3.07104	0.592935
RP13_766D20.2	5.14e-06	0.435734	0.35229	11.5305	7.60107
YPEL3	5.14e-06	6.37521	6.84581	1.07693	0.04602
ZDHHC20	5.14e-06	12.7774	12.1889	25.0295	26.3256
RP11_278J6.1	5.14e-06	2.3871	2.46654	0.653971	0.291475
RP11_701H24.3	5.14e-06	2.00853	1.8578	4.91843	4.51943
SLC25A26	5.14e-06	5.0297	4.94639	9.89048	9.28261
SLC12A9	5.14e-06	12.4264	10.5502	5.67728	5.49885
DENND1A	5.14e-06	3.98577	3.29842	1.03257	0.54404
FOXC1	5.14e-06	0.19586	0.03397	0.741876	0.69835
KIF9_AS1	5.14e-06	0.470542	0.406075	0.116682	0.07149
DPYSL3	5.14e-06	0.884089	0.1021	1.07071	1.02499
RP3_337H4.10	5.14e-06	5.07989	5.1242	9.90164	8.97483
CNR2	5.14e-06	0.525062	0.092885	2.06989	1.48795
RP11_550I24.2	5.66e-06	0.355425	0.228215	0.0349069	0.03479
RP11_534L20.5	5.69e-06	0.0860506	0.06693	423.851	341.18
CSF1	6.51e-06	3.58659	0.210835	4.91964	5.42469
SCPEP1	6.51e-06	39.4288	35.3524	12.1146	9.81208
PTOV1_AS1	6.51e-06	2.99278	2.89147	5.24536	5.17251
NR3C2	6.51e-06	0.201619	0.081135	1.19595	1.02432
DNAJC16	6.51e-06	3.16244	3.33028	20.1426	13.9393
KRT81	6.51e-06	0.638237	0.205875	1.19931	1.01392
AC017101.10	6.51e-06	0.837531	0.80181	2.83399	2.25402
RP11_380G5.3	6.51e-06	1.37884	1.29636	0.581991	0.02622
TMCO3	6.51e-06	8.30683	8.31025	7.47522	0.29368
KLHL7	6.51e-06	3.58663	3.72494	1.04043	0.296955
SLC36A1	6.51e-06	1.90146	1.72912	4.60285	4.44707
PLCD3	6.51e-06	1.39495	0.825525	0.626716	0.056995
RP11_465N4.4	6.51e-06	0.556509	0.41229	0.123882	0.032595
RPS3AP47	6.51e-06	5.85074	5.37887	10.3817	10.4265
IL1RAP	6.51e-06	0.762716	0.6708	4.41706	3.83935
BRWD1	6.51e-06	4.83871	4.89078	1.96051	0.0632
PRKAR1B	6.51e-06	6.57047	3.86752	1.16576	0.247425
NR2C2AP	6.51e-06	15.5423	15.4935	8.44079	8.03289
AL513327.1	6.51e-06	8.06397	8.81907	13.0912	11.9736
RP11_849H4.2	6.51e-06	0.961419	0.93386	2.22322	1.97774
RP3_512E2.2	6.51e-06	4.1763	3.30459	0.0263381	0.007315
SYNGR3	6.51e-06	0.674342	0.02686	1.22324	1.25849
GSE1	6.51e-06	12.1764	10.0222	39.9746	43.9763
TFAP2A_AS1	6.51e-06	3.42487	2.94455	10.838	10.6651
PLXNB2	6.51e-06	45.8972	44.8938	8.39228	0.56728
ITGA1	6.51e-06	0.324968	0.01044	1.42944	0.50304
CNR1	6.51e-06	0.659216	0.009185	2.4089	1.77672
SLC35C2	6.51e-06	13.5085	13.5073	24.6303	24.158
RP11_101E7.2	6.51e-06	0.961342	0.79848	0.277043	0.08092
TP53TG5	6.51e-06	0.0370317	0.03423	0.128528	0.109455
TBL3	6.51e-06	31.7593	27.7718	19.5319	19.1225
RP1_159M24.1	6.51e-06	4.23653	3.93743	8.00633	7.72297
INHBB	6.51e-06	0.501759	0.026815	4.13208	1.89026
SOWAHC	6.51e-06	0.169442	0.02457	0.374313	0.24255
ZHX2	6.51e-06	31.1916	34.7756	6.0367	4.138
ALCAM	6.51e-06	9.17324	7.05602	1.42269	1.07156
PTRH2	6.51e-06	6.67592	6.08969	2.366	1.01808
PDIA5	6.51e-06	4.05464	1.93515	6.781	6.25912
CMTM7	6.51e-06	32.5244	26.0771	4.28948	0.36756
AC023632.1	6.51e-06	0.0755033	0.069145	0.0278044	0.00737
RAPGEF2	6.51e-06	6.76721	6.46764	1.08611	0.0906
RP11_283I3.6	6.51e-06	2.70557	2.61769	0.973852	0.635565
RP11_395A13.2	6.51e-06	0.425561	0.384035	0.156049	0.11923
CTD_2267D19.2	6.51e-06	0.924413	0.552145	3.0078	3.05408
RP11_1020A11.1	6.51e-06	0.629971	0.67756	0.143539	0.05471
SLC38A9	6.51e-06	2.29548	2.30861	1.03663	0.939735
RP11_421L21.3	6.51e-06	3.04071	3.15943	0.641733	0.080715
CTD_2325M2.1	6.51e-06	0.623233	0.524655	0.17012	0.154555
RFX3	6.67e-06	1.83923	2.00755	0.0400756	0.025025
SNX22	6.67e-06	12.3381	10.1429	0.388285	0.099135
SNORA23	7.84e-06	0.344902	0.287885	0.0444075	0.00957
PARG	8.2e-06	7.33349	7.43043	2.51841	1.97859
RP11_752G15.6	8.2e-06	8.65531	7.72595	3.5384	3.21541
B4GALT4	8.2e-06	1.91964	1.72453	0.915219	0.78243
NFYB	8.2e-06	13.1621	12.8456	9.58927	0.348805
LINC00641	8.2e-06	4.01116	3.64963	0.887804	0.29315
RP1_265C24.8	8.2e-06	0.211689	0.183625	0.0654369	0.03406
NT5DC3	8.2e-06	1.55038	1.33901	10.253	8.70873
HR	8.2e-06	1.77185	0.13267	3.04956	2.89485
CTD_2554C21.1	8.2e-06	0.609464	0.6148	2.97704	2.5179
RP5_828K20.1	8.2e-06	0.195075	0.182875	1.48434	0.864795
R3HDM2	8.2e-06	9.82316	9.73142	20.3048	18.2926
EPHB1	8.2e-06	1.59011	0.01022	3.74101	1.81435
LSMD1	8.2e-06	17.0966	13.4123	6.76755	5.91496
RP3_330M21.5	8.2e-06	2.27716	1.94226	0.774858	0.055505
GS1_393G12.12	8.2e-06	3.75421	2.48496	5.61858	5.25711
KIAA1324	8.2e-06	0.578406	0.032715	0.76532	0.554985
SPOCK1	8.2e-06	0.204044	0.052345	0.241021	0.219425
AURKAPS1	8.2e-06	1.12794	1.01065	3.24893	2.4086
IL10RA	8.2e-06	1.27103	0.09377	2.55778	2.30811
EFEMP2	8.2e-06	0.507208	0.355695	0.127188	0.07653
FOXA1	8.2e-06	0.0949039	0.02121	0.203329	0.14486
MIR4435_1HG	8.2e-06	0.306154	0.033415	1.9804	2.14094
RP11_1348G14.6	8.2e-06	0.463756	0.43956	4.17674	2.86589
PIGW	8.2e-06	9.80666	9.51884	18.1778	16.583
METTL8	8.2e-06	3.0651	3.215	7.75402	7.24533
IL1R1	8.2e-06	0.375112	0.029785	0.511412	0.48667
ITGB1BP2	8.2e-06	1.41219	1.25099	0.462902	0.435905
ASGR1	8.2e-06	0.339033	0.298795	0.0169612	0.010995
MAGED2	8.2e-06	15.6698	15.0738	27.6915	28.0471
CTD_2287O16.5	8.2e-06	0.646609	0.62272	1.63322	1.38401
TGM2	8.2e-06	0.347354	0.26755	0.0867569	0.01868
AC004158.2	8.2e-06	0.448664	0.432245	0.140891	0.02738
NUS1	8.2e-06	15.5654	16.9446	61.593	64.0251
RP11_1166P10.1	8.42e-06	0.380496	0.340025	0.0038	0.0024
DCDC2	9.25e-06	0.106871	0.017765	12.3973	10.7482
GPC3	9.25e-06	0.0255239	0.016135	0.965586	0.47993
KIFAP3	1.03e-05	5.30068	3.75187	0.821206	0.084905
MED27	1.03e-05	13.2327	11.9662	7.79689	7.40114
RP11_762I7.5	1.03e-05	1.77453	1.55832	0.370977	0.08149
CACUL1	1.03e-05	6.37958	6.03662	2.75588	2.00807
ZNF713	1.03e-05	0.755273	0.784175	0.137242	0.117705
RPL39P34	1.03e-05	1.86775	1.5298	0.44684	0.20662
FOSL1	1.03e-05	1.48885	0.57183	5.17174	5.75603
BMS1P16	1.03e-05	0.701873	0.525235	3.99953	3.11509
ITGB3BP	1.03e-05	6.01149	6.1299	9.99667	9.57781
DNAJC21	1.03e-05	9.7383	8.99194	16.2608	15.2119
RHOA_IT1	1.03e-05	0.566819	0.5828	2.22101	0.02312
RAB36	1.03e-05	0.7324	0.049275	1.72818	0.92436
AC072062.1	1.03e-05	0.668883	0.598855	0.112579	0.019565
AOX1	1.03e-05	3.14119	0.046185	4.00724	4.26616
RNGTT	1.03e-05	8.58352	9.11196	2.49791	1.12437
ZNF25	1.03e-05	1.07848	0.94221	2.59238	2.21373
PTPN18	1.03e-05	20.7025	17.5697	7.0734	6.45742
METTL20	1.03e-05	0.23563	0.209075	0.0772456	0.021325
RP11_111F5.5	1.03e-05	0.421253	0.33251	0.0624881	0.03733
RP11_315O6.1	1.03e-05	0.476172	0.3714	0.274929	0.06195
TSFM	1.03e-05	3.68837	2.96678	15.4602	13.957
CTC_241N9.1	1.03e-05	0.655711	0.634005	1.99226	2.0697
BBS12	1.03e-05	0.454308	0.45027	0.14039	0.093615
RPS3AP49	1.03e-05	0.1879	0.176	0.732491	0.0113
CHIC2	1.03e-05	9.25132	9.79425	3.45136	0.63574
RPS4XP16	1.03e-05	0.659462	0.57019	0.282942	0.024545
RP11_665A22.1	1.03e-05	0.810889	0.18697	1.08437	1.18857
CC2D1B	1.03e-05	7.64468	7.28004	2.70476	0.14834
ESR2	1.03e-05	0.183899	0.13046	0.0729194	0.01199
CTD_2521M24.5	1.03e-05	0.402116	0.15975	2.74114	1.67789
TCEA3	1.03e-05	0.574633	0.127115	1.02482	1.05496
RP11_415J8.3	1.03e-05	0.816613	0.785985	0.227008	0.146255
RP1_278E11.3	1.03e-05	0.219279	0.2508	0.762191	0.59583
RP11_603J24.14	1.03e-05	15.0488	13.3164	6.06216	5.14698
CTU1	1.03e-05	2.83752	2.54908	1.14523	0.780775
PDE10A	1.03e-05	0.206257	0.0077	0.39487	0.254725
MAP7D2	1.03e-05	0.631553	0.113935	0.94342	0.821245
ATP6V0A2	1.03e-05	5.93706	5.73157	11.5554	12.7606
SFT2D2	1.03e-05	11.1581	9.80751	5.23997	2.24916
FKRP	1.03e-05	4.22265	3.93685	6.88763	6.64213
SIRT1	1.03e-05	9.26699	8.94133	19.1035	18.1165
TLN2	1.03e-05	0.858125	0.478465	0.0953756	0.08067
C21orf67	1.03e-05	1.21737	0.706775	0.139991	0.06319
VPS13A	1.03e-05	7.03246	6.92299	2.25348	2.05695
BAIAP2L2	1.03e-05	0.513304	0.48295	0.115935	0.043985
RP11_228B15.4	1.03e-05	12.7479	12.6788	2.13462	1.7953
PTCD2	1.03e-05	3.56081	3.47207	0.794293	0.17729
IGHV5_78	1.03e-05	48.5026	32.0354	0.743282	0.59594
RRAGB	1.03e-05	4.38893	4.54214	9.22934	8.18916
NRARP	1.03e-05	1.80162	1.40196	4.30268	3.71337
RP1_125I3.2	1.03e-05	2.10561	1.75594	11.4014	10.7449
AC007401.1	1.03e-05	1.29308	1.29851	0.406896	0.146915
GFPT1	1.03e-05	10.7366	10.1108	5.07361	2.22751
POLR2F	1.03e-05	7.82026	6.76625	3.46699	2.77998
RP11_388M20.1	1.03e-05	0.559326	0.42534	2.73752	2.46895
TTC19	1.03e-05	15.5389	15.8622	33.0976	34.5869
KLC1	1.03e-05	9.32323	8.76784	6.11024	6.3944
TTLL13	1.08e-05	0.0923978	0.107565	0.0148581	0.00999
PAGE2B	1.09e-05	2.17691	0.11939	4.75445	4.95362
UMODL1	1.09e-05	1.49041	0.06859	6.02696	5.5179
CYP1B1_AS1	1.09e-05	0.157131	0.00707	0.679445	0.617475
ARHGEF3	1.27e-05	2.69121	1.02005	0.0399294	0.03228
RP11_118F19.1	1.27e-05	0.752499	0.3402	0.0514844	0.019575
RGL3	1.27e-05	0.0685856	0.013925	7.03813	1.37788
F5	1.27e-05	0.722146	0.00626	0.786617	0.67557
CLEC4A	1.27e-05	0.346279	0.17072	0.0350638	0.00843
SEMA3E	1.27e-05	0.0590633	0.00987	0.566601	0.5245
GNAO1	1.27e-05	0.0159383	0.007075	2.03153	0.541825
RP11_568J23.5	1.27e-05	1.03169	1.0296	0.16089	0.12864
SAMD5	1.27e-05	0.376045	0.007045	0.257291	0.073755
ARHGAP9	1.28e-05	8.75472	6.55331	2.0352	1.26218
ZNF229	1.28e-05	0.131359	0.00801	0.168673	0.14067
SH3D19	1.28e-05	0.0996067	0.03805	2.59099	1.6106
UNC50	1.28e-05	9.62958	9.17021	17.8849	17.1193
TM2D2	1.28e-05	5.02365	4.91444	7.65126	7.08129
ACAD10	1.28e-05	5.17098	5.2043	3.19198	2.52591
ENO2	1.28e-05	12.4513	8.19056	56.3942	48.9428
RTN3P1	1.28e-05	0.626329	0.65264	1.75332	1.65
SNORA52	1.28e-05	2.90754	2.98084	9.98398	7.1213
GTF2H1	1.28e-05	9.90481	10.0274	22.8171	20.4589
RP11_33B1.1	1.28e-05	2.98696	2.5846	2.39034	1.19413
TBC1D2	1.28e-05	0.694294	0.549245	3.08719	2.40911
IZUMO4	1.28e-05	2.71708	0.54469	4.90108	4.90768
CAMKK2	1.28e-05	13.8759	13.7418	4.36899	0.497545
RP11_701H24.7	1.28e-05	0.648514	0.63695	3.46613	3.0305
AC005740.5	1.28e-05	2.5697	2.67431	1.17727	1.16488
SMURF2	1.28e-05	5.73044	5.7344	2.49518	2.55882
CTD_2341M24.1	1.28e-05	0.395064	0.38965	0.0839637	0.014745
MSS51	1.28e-05	1.49478	1.39028	3.48336	3.32114
FBXO3	1.28e-05	2.62886	2.63925	5.50449	5.15573
RP11_74E24.2	1.28e-05	1.34192	1.38821	2.44846	2.58503
AP006222.1	1.28e-05	1.16916	1.12555	4.36376	3.13667
TNFRSF13C	1.28e-05	16.4764	13.2091	3.21692	2.50265
RNASEH2B	1.28e-05	42.4654	43.4888	12.7779	11.1702
TNC	1.28e-05	0.493553	0.114385	2.08266	1.74608
PGBD5	1.28e-05	1.30635	0.02321	1.6152	1.53526
HIRA	1.28e-05	13.981	14.186	20.2242	19.438
MBNL1_AS1	1.28e-05	1.1201	0.920725	0.935439	0.175595
CTD_2522E6.4	1.28e-05	0.103379	0.089005	0.448667	0.404155
RP4_530I15.9	1.28e-05	1.87946	1.98465	0.327109	0.03082
RP11_498E2.7	1.28e-05	1.52044	1.51854	3.2698	2.51192
MTF1	1.28e-05	3.87316	3.92756	1.13388	0.385855
ZNF615	1.28e-05	1.41225	1.39274	0.780628	0.02334
HILPDA	1.28e-05	10.4509	9.94942	2.70585	1.63073
RP1_228H13.5	1.28e-05	1.76092	1.65866	0.427939	0.161035
ZNF614	1.28e-05	3.92028	4.29838	1.4125	1.13545
AL022476.2	1.28e-05	0.35211	0.294765	2.04794	1.39684
SERINC1	1.28e-05	22.4782	21.2556	38.5065	37.1015
RPL7A	1.28e-05	639.271	628.389	388.779	401.464
RP11_17G12.2	1.28e-05	0.832653	0.90436	60.0754	46.3391
BRD7P2	1.28e-05	3.91934	4.12072	5.64106	5.50273
AC089999.1	1.28e-05	18.9622	12.1041	7.61079	7.08176
RP11_485O10.3	1.28e-05	2.46641	2.27786	10.4208	10.3432
RP11_531F16.4	1.28e-05	3.71095	3.42619	19.4315	10.0922
RP11_677M14.6	1.28e-05	0.867988	0.925445	1.93895	1.60465
POLR3B	1.28e-05	4.30305	4.07245	10.8062	10.5908
FAM86FP	1.28e-05	0.620838	0.455085	0.0929481	0.074545
AC021593.1	1.38e-05	2.16642	2.56128	30.1118	26.3862
METTL25	1.49e-05	1.65962	1.48593	0.344446	0.023635
KIAA1614	1.49e-05	0.824576	0.551095	0.456252	0.008005
MOXD1	1.49e-05	2.94066	0.051105	3.02445	3.01616
PYCARD	1.49e-05	31.715	25.6613	4.52148	2.81869
SCN8A	1.49e-05	0.123111	0.011	4.62567	4.19505
RP11_712L6.7	1.49e-05	0.738517	0.73225	0.0916825	0.014775
FBXL12	1.59e-05	8.27583	8.31165	5.58066	5.50695
LA16c_OS12.2	1.59e-05	0.484066	0.41609	0.102294	0.065865
SPTLC1	1.59e-05	11.3623	11.9858	16.9077	16.9539
CANT1	1.59e-05	12.4356	12.0617	21.3979	19.215
HNRNPCP1	1.59e-05	2.08819	1.81559	5.63584	4.66929
CABIN1	1.59e-05	12.8134	12.343	19.7782	19.5842
RSBN1L	1.59e-05	8.64404	7.7049	25.7132	20.8799
ZNF322P1	1.59e-05	2.68808	2.72905	1.16188	1.1525
FMNL2	1.59e-05	12.7448	9.07072	1.83532	0.31885
ZNF684	1.59e-05	1.72225	1.6579	4.05221	3.3787
ODC1	1.59e-05	299.392	186.352	88.3024	84.549
ZNF764	1.59e-05	5.48172	5.39229	3.74215	3.73635
PPP1R3B	1.59e-05	1.64836	1.3993	0.340053	0.007035
PTGES3L	1.59e-05	1.2066	0.95038	0.206767	0.039525
CSPG5	1.59e-05	0.07671	0.05132	0.291371	0.25386
OARD1	1.59e-05	7.92896	8.01251	13.0732	12.7099
BCL2L15	1.59e-05	0.215707	0.163055	1.16468	0.76853
PKD1	1.59e-05	9.42428	9.31208	2.35371	0.804205
SLC12A2	1.59e-05	5.80147	4.93276	10.9529	10.6152
SHANK2	1.59e-05	0.0689122	0.00523	0.208934	0.17022
TMEM216	1.59e-05	2.18336	1.78236	0.389723	0.12989
UFSP2	1.59e-05	7.72852	6.2675	2.85435	1.41639
AC116366.6	1.59e-05	4.02709	2.99937	10.5358	9.45184
RND1	1.59e-05	1.51867	1.23755	0.586355	0.028305
TTC4	1.59e-05	9.14196	8.85346	4.79229	4.1754
CLIP4	1.59e-05	0.583349	0.03379	1.38439	0.979425
HOXB9	1.59e-05	0.476066	0.02927	1.13591	0.811645
SLC25A30	1.59e-05	7.80438	6.72789	1.98678	1.26997
SURF1	1.59e-05	15.55	12.9218	41.1439	40.8591
PMS2P2	1.59e-05	2.6222	2.21158	1.26627	0.09369
TMEM80	1.59e-05	6.51746	6.38089	3.22548	2.99375
PCDHB10	1.59e-05	0.0529217	0.034955	0.230275	0.19613
LMBR1	1.59e-05	3.55952	3.72036	1.29693	0.715745
PIK3R4	1.59e-05	8.19085	8.30923	13.6021	13.9477
CRYGS	1.59e-05	1.17835	1.04019	3.45578	2.85958
ZNF608	1.59e-05	26.506	16.5622	0.839204	0.036195
RNF13	1.59e-05	5.82017	5.50986	25.368	17.3171
AL139819.1	1.59e-05	39.7286	24.9548	154.275	151.761
ABI2	1.59e-05	10.2479	10.6536	4.42867	4.29087
RP4_785G19.2	1.59e-05	0.165054	0.1466	0.0330069	0.02654
EIF4A2P2	1.59e-05	0.0503756	0.04887	0.17431	0.15256
PINX1	1.59e-05	7.93303	7.00475	1.61494	0.04316
C12orf66	1.59e-05	2.59816	2.16249	5.23083	5.09293
RIN1	1.59e-05	0.7484	0.549725	0.223216	0.05712
MBOAT2	1.59e-05	2.55538	2.44036	5.96848	5.77603
RP5_1068E13.7	1.59e-05	1.06995	1.00304	0.341694	0.05556
FTO	1.59e-05	3.50957	3.57491	5.97772	5.51912
COQ7	1.59e-05	4.50992	4.48231	1.53485	0.102045
LL09NC01_251B2.3	1.59e-05	0.263607	0.250415	4.64109	2.22188
OAZ3	1.59e-05	0.0875067	0.07923	0.515866	0.377205
ZBTB7C	1.61e-05	0.0103783	0.003655	0.334094	0.12396
CCDC78	1.73e-05	3.56617	2.91801	0.326182	0.15972
CYP3A7	1.74e-05	0.0295089	0.02147	0.134551	0.0965
CDK5R1	1.74e-05	2.39511	1.4774	0.280591	0.067475
TMEM14D	1.74e-05	0.317423	0.29898	0.0764531	0.00589
PQLC2	1.97e-05	4.25515	3.22369	9.61405	9.01632
CCDC84	1.97e-05	7.10454	7.11569	17.5399	13.8738
KCNQ3	1.97e-05	0.172278	0.01835	0.181294	0.162505
ID3	1.97e-05	89.0242	86.8593	32.748	12.4403
NAT1	1.97e-05	2.60462	2.67583	1.1693	0.33978
FGFR3	1.97e-05	0.177173	0.03697	0.393199	0.18188
ZNF837	1.97e-05	1.89221	1.7127	0.518566	0.133915
RNU1_39P	1.97e-05	0.368597	0.330945	0.0510231	0.010455
FAM225A	1.97e-05	0.0550128	0.003085	0.0872594	0.059425
FBXL14	1.97e-05	7.16921	7.49292	2.53299	1.11728
RPL7AP6	1.97e-05	652.157	670.924	415.803	414.625
LINC00942	1.97e-05	0.0552583	0.01457	0.0926338	0.082445
CDYL	1.97e-05	12.0766	11.3205	6.74681	7.25288
RP11_1096G20.5	1.97e-05	0.395779	0.35136	1.59422	1.57079
IDS	1.97e-05	0.795236	0.458815	0.0928337	0.051985
SLMAP	1.97e-05	4.25029	4.46654	6.14045	6.0764
CTD_3092A11.1	1.97e-05	1.59821	1.32749	3.67801	3.03851
NCR3	1.97e-05	3.17117	0.21992	4.2377	3.80829
SP110	1.97e-05	10.8981	8.98144	48.6029	29.5606
TCEA1P4	1.97e-05	0.54849	0.579045	0.127582	0.043075
RP11_474G23.3	1.97e-05	0.49365	0.48228	1.29717	1.02636
RP11_93K22.13	1.97e-05	1.05525	0.71463	2.88196	2.47242
FAM129C	1.97e-05	52.9538	47.9551	1.36067	0.761055
THAP3	1.97e-05	5.30498	4.55351	26.5079	21.7086
KRTCAP3	1.97e-05	0.882849	0.792805	0.33512	0.17242
AMT	1.97e-05	2.14485	1.95081	0.478562	0.091045
LAPTM5	1.97e-05	264.79	242.44	75.1877	68.037
FAM3C	1.97e-05	29.309	23.2578	9.94918	9.6409
PHLDA2	1.97e-05	0.236618	0.071335	0.590794	0.63532
AKAP10	1.97e-05	7.06392	7.41475	10.438	11.036
AC007038.7	1.97e-05	1.05507	1.21508	0.280068	0.23993
ZBTB40	1.97e-05	9.59342	9.52606	15.3914	14.9448
RP11_697H9.2	1.97e-05	0.554756	0.602665	0.14482	0.03507
SRRD	1.97e-05	23.8037	27.0102	9.60788	9.66934
MEIS3	1.97e-05	0.473062	0.01652	0.394584	0.31931
CISH	1.97e-05	7.71914	1.37302	0.344994	0.13357
THBS3	1.97e-05	4.53152	3.1149	12.118	8.96195
TMEM59L	1.97e-05	0.0738822	0.026915	0.280537	0.239795
RP11_574K11.5	1.97e-05	2.61143	2.48879	0.798289	0.573805
RP11_774O3.3	1.97e-05	0.663363	0.5661	1.93833	2.01194
KCNN3	1.97e-05	0.781878	0.03946	1.24342	1.16333
AC137932.5	1.97e-05	1.44901	1.10379	0.290789	0.05054
CEP19	1.97e-05	3.11619	2.86807	6.68672	5.57805
PTPRB	1.97e-05	0.291733	0.03835	1.47568	1.2185
RP11_708J19.2	1.97e-05	0.951468	0.93999	0.242427	0.05726
RP3_475N16.1	1.97e-05	2.05311	2.12898	4.54212	4.029
HIST1H2BO	1.97e-05	2.47238	2.10371	0.868707	0.61559
LRFN1	1.97e-05	3.00752	3.16512	6.24369	6.01443
RP4_669L17.8	1.97e-05	2.32321	2.17696	5.94884	6.39076
AC008731.1	1.97e-05	18.8613	18.5163	7.72921	7.22725
KCNK5	1.97e-05	1.24132	0.01659	5.16118	4.98267
RHOV	1.97e-05	4.08149	1.1805	0.279989	0.107515
KANSL3	1.97e-05	17.453	18.2452	25.7101	25.9585
CCDC85B	1.97e-05	46.2333	36.2679	19.3551	18.9394
ENKUR	2.02e-05	0.0604933	0.010375	0.604942	0.307295
RP11_172F4.2	2.03e-05	1.13462	1.14196	0.274761	0.282335
LRRN1	2.03e-05	0.19095	0.014585	0.998334	0.875785
CD200R1	2.03e-05	0.0806689	0.009195	0.190087	0.122295
JAKMIP1	2.36e-05	1.25093	0.01747	5.18203	4.9397
UST	2.37e-05	0.661409	0.54323	0.089375	0.00463
CFH	2.43e-05	0.513031	0.03573	0.495556	0.357185
DDX60	2.43e-05	2.04127	0.956255	0.432982	0.019505
EXOSC2	2.43e-05	23.5459	23.1489	17.4838	17.9668
RDH5	2.43e-05	1.34118	1.24789	0.380481	0.283755
ISG20L2	2.43e-05	13.492	12.1645	19.8837	19.9364
CD70	2.43e-05	27.9612	10.3781	7.60365	0.16807
RP11_345K20.2	2.43e-05	0.554012	0.58813	2.2383	1.64196
CA8	2.43e-05	0.145503	0.016685	0.0048244	0.00391
MFGE8	2.43e-05	11.6047	9.78308	30.848	27.7263
RNF217	2.43e-05	0.0740633	0.009715	0.238593	0.23181
KRAS	2.43e-05	13.4321	7.13177	14.3045	14.584
MAOA	2.43e-05	0.0649972	0.020155	0.0784881	0.07939
NONOP2	2.43e-05	1.39272	1.32882	5.33761	5.71727
DFNB31	2.43e-05	1.12916	0.22103	1.37042	1.32422
RP11_717A5.2	2.43e-05	1.23654	1.21391	0.379681	0.08704
RNF139_AS1	2.43e-05	0.630776	0.667175	1.91102	1.65681
AC005594.3	2.43e-05	3.35517	3.52605	7.36569	6.10812
DPEP2	2.43e-05	0.333681	0.196345	2.58736	1.74598
AC024937.4	2.43e-05	0.525511	0.46545	1.81296	1.35378
TCEANC	2.43e-05	0.610722	0.618565	1.67823	1.50789
RP11_4K3__A.5	2.43e-05	1.74763	1.65634	3.49987	3.493
SNORD94	2.43e-05	1.22125	1.20223	2.64013	2.65262
PRKCDBP	2.43e-05	0.321801	0.04184	2.26491	1.84397
PRSS36	2.43e-05	0.103126	0.064485	0.513091	0.22667
CA5BP1	2.43e-05	4.95336	3.68017	8.62897	8.67535
RPL7AP30	2.43e-05	19.9593	19.5325	13.1325	13.4873
RDH13	2.43e-05	2.18202	1.57784	17.7052	10.6977
FOXD4L2	2.43e-05	0.0734017	0.0414	0.345437	0.265
MYRF	2.43e-05	1.87154	0.182965	3.60924	3.51408
PPIAP31	2.43e-05	2.25797	2.51221	0.658087	0.241465
ADAMTSL5	2.43e-05	0.290247	0.014125	0.209022	0.16929
ZNF225	2.43e-05	1.76124	1.55861	0.533932	0.27926
GDPD5	2.43e-05	1.3905	1.09542	0.225321	0.127565
CSNK1G1	2.43e-05	5.10575	5.22887	8.14198	7.4
EIF3J_AS1	2.43e-05	2.66208	2.61972	6.97777	5.36787
TMEM102	2.43e-05	5.29155	4.40371	2.19584	0.200685
RP11_15L13.4	2.43e-05	14.2938	14.4686	3.96223	1.12055
SCD	2.43e-05	47.9419	29.923	183.301	177.303
RWDD2B	2.43e-05	4.39518	4.18532	8.56665	8.65929
PBX2	2.43e-05	33.9214	33.7026	53.0777	52.0838
ASAP3	2.43e-05	1.54813	1.10166	0.0918775	0.036785
GGTA2P	2.43e-05	0.165972	0.128115	0.673763	0.615465
UBE2Q2P3	2.43e-05	1.11408	1.07249	2.36999	0.17045
RGAG4	2.43e-05	0.251273	0.01738	0.317218	0.28415
MORN1	2.43e-05	0.61939	0.530015	2.47475	2.03652
CBX7	2.43e-05	3.0228	2.66134	6.30515	6.32568
NPHP4	2.43e-05	4.35854	4.78209	1.55355	0.99529
TNFRSF9	2.43e-05	0.418627	0.01174	1.3525	0.78413
DSC3	2.43e-05	0.620666	0.012345	2.17554	1.85838
RPS6KB1	2.43e-05	8.24859	8.10437	17.461	15.0516
RP11_308D16.4	2.43e-05	1.27532	1.15616	2.46105	2.29228
TPTE	2.43e-05	0.179754	0.01339	0.167919	0.139225
EFNA5	2.43e-05	0.496253	0.02473	0.673914	0.631035
USP30	2.43e-05	2.81999	2.59158	6.38991	6.16796
SLC6A6	2.43e-05	8.46587	8.17278	15.79	15.5588
PRTG	2.43e-05	0.0561733	0.00352	1.75994	0.24102
ERBB3	2.43e-05	3.37517	0.067735	5.05797	3.89282
PCBP2P1	2.56e-05	0.148484	0.110495	0.016895	0.01387
HNRNPH1P1	2.75e-05	0.403544	0.25572	0.03932	0.01617
PGAM1P7	2.76e-05	1.73589	1.48432	0.143016	0.05305
RP3_323N1.2	2.76e-05	0.39024	0.11917	1.69285	1.5291
ESCO2	2.76e-05	8.21136	8.0791	7.58022	0.04664
RP11_524O24.2	2.76e-05	0.196498	0.16121	0.04876	0.01554
HKDC1	2.98e-05	0.031785	0.030845	2.1126	0.213755
DTX4	2.98e-05	4.20703	1.56682	11.6654	12.2299
CCNA1	2.98e-05	2.15049	0.152545	5.20556	4.09678
RGS17P1	2.98e-05	1.07242	0.94307	0.365366	0.15278
RP11_424N24.2	2.98e-05	1.30864	1.23906	0.626082	0.255525
BLK	2.98e-05	37.2357	19.9395	5.68846	0.206115
ZC3H6	2.98e-05	0.79178	0.745385	2.126	2.20205
STRBP	2.98e-05	22.4131	23.8185	10.3262	10.0329
ISM2	2.98e-05	0.106736	0.011895	0.246923	0.19202
EIF4A1P7	2.98e-05	0.175636	0.156275	0.570729	0.54661
CYP4F3	2.98e-05	0.248846	0.04092	3.55858	1.21853
RP11_510N19.5	2.98e-05	1.66669	0.24984	1.93065	1.43172
XXbac_B476C20.9	2.98e-05	2.75075	2.70797	0.701671	0.13497
CD82	2.98e-05	13.9845	2.26503	23.7517	24.1334
ENG	2.98e-05	32.6143	23.4743	1.6286	1.06004
ENOX2	2.98e-05	4.90273	4.84828	10.8601	8.8257
BNIP3L	2.98e-05	15.6814	14.0763	40.7899	37.2114
RP11_516C1.1	2.98e-05	8.9035	8.74047	26.3317	21.1736
CLU	2.98e-05	1.3372	0.215905	2.36401	2.26117
UBQLN2	2.98e-05	14.2032	15.004	6.14973	3.43311
RP11_73K9.2	2.98e-05	0.550652	0.526575	3.60063	3.11943
HIST1H2AL	2.98e-05	1.07823	1.06992	0.447524	0.27327
PDPN	2.98e-05	2.15581	0.041885	9.49897	8.9174
MIS18A_AS1	2.98e-05	0.291353	0.26256	2.01453	0.837425
FSIP1	2.98e-05	0.250271	0.254265	0.232246	0.02647
RP11_216P16.2	2.98e-05	0.744269	0.700335	1.6863	1.52303
CCNI	2.98e-05	67.6658	70.5322	102.151	95.9889
PDIA6	2.98e-05	124.321	127.627	64.4677	56.8858
INPPL1	2.98e-05	42.825	43.3309	22.1092	20.1629
RP11_466F5.8	2.98e-05	0.258916	0.23847	0.0695688	0.0438
C14orf37	2.98e-05	1.58708	0.95502	6.51585	6.55907
AC004706.1	2.98e-05	1.34815	1.26493	3.44344	2.61142
ARHGAP17	2.98e-05	29.1622	29.1371	12.6059	11.3423
PKDCC	2.98e-05	5.32014	0.4813	8.53011	8.14462
EEFSEC	2.98e-05	13.3386	13.0276	18.78	18.1312
ALOX12P2	2.98e-05	0.272084	0.056775	1.11068	1.01907
SEPP1	2.98e-05	0.798022	0.1372	2.58209	2.17961
DMKN	2.98e-05	10.1108	0.055885	8.95847	9.263
SMN2	2.98e-05	14.8174	13.3294	5.37726	2.29519
BCAN	2.98e-05	0.203528	0.00825	0.215339	0.200165
BAZ2B	2.98e-05	1.74595	1.69662	3.5467	3.50868
RIMKLBP1	2.98e-05	0.189793	0.172855	0.0475806	0.037235
RP11_457M11.2	2.98e-05	1.59145	1.38986	3.7249	3.8123
DUSP5	2.98e-05	6.03036	0.090045	10.4332	9.20317
MMP24	2.98e-05	0.954204	0.78074	0.507046	0.231095
AP006621.1	2.98e-05	2.88781	2.56743	6.74149	6.24563
KCTD16	2.98e-05	0.0072706	0.00661	0.0291544	0.01939
RPUSD1	2.98e-05	17.4879	16.9052	9.69851	10.0929
TAPBPL	2.98e-05	10.3177	7.99716	20.0282	17.2133
VEGFC	2.98e-05	0.0793239	0.03095	0.262632	0.15178
UBAP1L	2.98e-05	0.494412	0.482315	0.17723	0.134605
AC079466.1	2.98e-05	5.43502	0.02073	6.68566	6.74156
RHD	3.2e-05	0.0506011	0.042895	0.1886	0.18276
TSGA10	3.2e-05	0.419553	0.384505	0.436132	0.018505
RP11_383C5.7	3.2e-05	1.9186	2.06407	0.653026	0.01604
RPL5P18	3.21e-05	0.144483	0.11752	0.0228931	0.0116
MUC4	3.64e-05	2.42243	0.03973	2.50862	2.44592
CNNM1	3.64e-05	0.103393	0.00461	0.0780544	0.06107
RP4_607J23.2	3.64e-05	0.468841	0.337765	3.41681	2.51457
U73166.2	3.64e-05	0.398174	0.44641	1.51115	0.01879
DSTYK	3.64e-05	1.94949	1.87041	0.538649	0.08319
SLAMF7	3.64e-05	10.7991	0.025185	9.80108	9.88205
EMP1	3.64e-05	1.79551	0.308575	2.4712	2.63164
MEF2A	3.64e-05	16.3029	14.3099	7.26225	6.36214
GPR183	3.64e-05	4.49623	0.096235	5.01914	4.49193
SMG9	3.64e-05	12.6605	12.5224	17.7812	17.3559
CD24P4	3.64e-05	252.939	212.252	1.043	0.72045
TBCCD1	3.64e-05	7.93458	7.7847	4.28546	3.58883
AC115115.2	3.64e-05	0.559428	0.49677	0.178784	0.10283
ATE1	3.64e-05	5.69018	6.15684	8.43884	8.0914
CDR2	3.64e-05	10.4797	9.35755	19.8239	19.9039
DAPK3	3.64e-05	14.8291	13.4029	27.3074	28.2138
MRPS22	3.64e-05	11.4584	10.2575	4.61963	4.34777
DUSP4	3.64e-05	5.32426	0.484405	47.1559	45.1131
HPS5	3.64e-05	6.84297	7.03345	11.0174	10.6581
CHI3L1	3.64e-05	1.26051	0.04488	1.79138	1.45836
C11orf80	3.64e-05	3.57534	3.34688	1.57555	1.16145
RP4_682C21.2	3.64e-05	1.31062	1.32917	5.37873	4.2155
GLTP	3.64e-05	10.2488	9.74802	4.86296	2.11156
TRIM60P18	3.64e-05	2.08756	2.06373	0.50996	0.11576
ST8SIA1	3.64e-05	0.0864017	0.00314	0.128213	0.110705
RP11_60I3.4	3.64e-05	3.80479	3.78527	1.83396	0.29499
MGLL	3.64e-05	2.02301	0.07078	3.58427	2.65678
IGF2BP1	3.64e-05	4.21641	0.018135	6.16316	6.53108
GRIA4	3.64e-05	0.0097283	0.00728	0.0362619	0.0266
CEP57	3.64e-05	18.5303	18.8522	30.5582	27.9454
C6orf136	3.64e-05	7.56158	7.55382	20.0038	21.7071
AOAH	3.64e-05	0.209572	0.13792	1.14888	0.96803
FAS	3.64e-05	8.23604	1.69231	11.5163	10.7867
ING5	3.64e-05	8.33409	7.93646	3.59729	2.53991
BCL2A1	3.64e-05	8.30678	0.07297	7.45432	7.30328
LIPH	3.64e-05	1.89223	0.037365	2.35803	2.37393
PAXIP1_AS1	3.64e-05	7.59459	6.8083	3.0916	1.97243
ZNF234	3.64e-05	2.18882	2.19727	3.91678	4.0247
SYTL1	3.64e-05	8.29877	7.16538	22.196	24.0208
FAM66C	3.64e-05	0.301106	0.227855	0.0384725	0.031655
TSPAN32	3.64e-05	1.04028	0.060615	1.18129	1.00897
COL6A3	3.64e-05	8.71636	0.15558	6.56057	7.0408
RP11_524F11.2	3.64e-05	9.45804	9.63052	3.11168	1.92849
KRT8P46	3.64e-05	1.35806	1.37379	0.960597	0.0856
ZNF780A	3.64e-05	1.80227	1.61835	4.13347	4.23325
SMURF1	3.64e-05	8.2727	6.9462	3.85256	3.63896
HCP5	3.64e-05	19.9135	15.3011	5.68169	0.250195
RP3_416H24.1	3.64e-05	0.727689	0.220075	1.04146	1.07787
ZNF576	3.64e-05	4.98394	4.66016	8.15598	7.93171
CTC_453G23.8	3.64e-05	4.08365	4.08605	9.7638	10.5796
C6orf223	3.64e-05	2.26623	0.03707	3.16335	2.89693
IFI44L	3.64e-05	5.97263	0.06257	6.06646	5.68279
NUDT16	3.64e-05	4.93778	4.11864	0.933214	0.1873
GOLGA8N	3.64e-05	1.96865	0.27534	1.91865	2.18266
APOL4	3.64e-05	2.1519	0.03651	3.03126	2.63741
RP11_343N15.5	3.64e-05	5.981	5.91296	1.93556	1.23994
CLDN16	3.64e-05	0.397036	0.02191	0.508271	0.40242
DAPL1	3.64e-05	3.45147	0.08677	3.19425	3.10267
KRT17	3.64e-05	1.02576	0.25609	1.28996	1.13647
TRAF1	3.64e-05	9.05121	1.15766	11.6447	10.8788
LRRC8A	3.64e-05	7.99842	7.99246	4.15258	3.91854
MSC	3.64e-05	8.21991	0.023025	10.0457	9.72546
GPAT2	3.64e-05	1.10735	0.058785	0.926418	1.01434
BAG2	3.64e-05	5.19849	4.83432	1.14103	0.04244
RP13_977J11.5	3.64e-05	2.46679	2.40301	4.83505	4.44293
ST14	3.64e-05	4.29609	0.12071	4.0522	3.6585
RP11_58K22.5	3.64e-05	6.50474	0.95582	6.17895	5.46853
FGR	3.64e-05	10.0645	0.01737	10.4073	10.5145
ARNT2	3.64e-05	0.538977	0.01825	0.946358	0.89194
RP4_800G7.2	3.64e-05	2.84241	2.11887	7.72239	7.33159
STAR	3.64e-05	0.0957017	0.047395	0.121957	0.10194
RP11_727F15.11	3.64e-05	0.781349	0.826265	2.17262	1.89532
KLHL29	3.64e-05	0.64877	0.05328	1.15165	1.08078
LIN52	3.64e-05	6.41636	6.10837	10.0352	10.3472
TOP3B	3.64e-05	9.99406	9.63602	5.66244	5.5983
DUSP1	3.64e-05	38.1629	34.4111	4.1356	3.48951
SLC16A3	3.64e-05	2.68622	0.89222	6.40764	5.04837
HIST2H2BE	3.64e-05	5.1643	4.11878	1.56265	0.493775
RP11_109P14.10	3.64e-05	5.345	3.80986	7.71046	8.56405
CD274	3.64e-05	2.83022	0.343465	3.0083	2.77353
CRIPAK	3.64e-05	2.0123	2.07709	0.704486	0.27523
MAGEA3	3.64e-05	3.54355	0.06673	5.1169	4.58343
FAM46C	3.64e-05	3.69595	0.41951	2.58181	2.41639
WHSC1L1	3.64e-05	12.3422	13.3598	19.3112	19.2727
SLC1A1	3.64e-05	0.534804	0.00969	0.716199	0.623395
KYNU	3.64e-05	3.19119	0.068015	4.537	4.2112
CAV1	3.64e-05	3.83861	0.590645	5.32903	5.10858
MAGEA6	3.64e-05	3.68263	0.068115	4.79345	4.22206
BTLA	3.64e-05	2.51054	0.009615	2.65671	2.26927
RP11_557C18.3	3.64e-05	5.34433	4.84696	10.2019	9.92535
STK35	3.64e-05	7.17126	7.29007	12.7058	11.113
TSHR	3.64e-05	0.719708	0.03268	0.478249	0.395325
RP11_3L21.2	3.72e-05	0.0298711	0.017515	0.294612	0.14031
DKK3	3.73e-05	0.0872061	0.084095	0.0208138	0.015295
TSPO2	4.32e-05	0.0767028	0.061715	0.406433	0.317915
TCL1A	4.33e-05	337.375	282.569	1.40562	0.04747
RP11_324I22.4	4.33e-05	1.30775	1.32098	0.342394	0.29386
KCTD21_AS1	4.33e-05	1.19994	1.07415	0.350815	0.249905
RHOU	4.33e-05	1.04242	0.408725	0.0602456	0.011925
AC007551.3	4.33e-05	0.198508	0.17193	0.731912	0.008585
RP11_452L6.1	4.43e-05	1.42927	1.28025	2.69709	2.57332
AC084125.4	4.43e-05	6.43495	6.55227	2.60117	1.79692
RP3_395M20.8	4.43e-05	1.93092	0.49054	4.92997	4.25042
XRCC6P2	4.43e-05	1.42501	1.40274	2.57787	2.47118
RP11_890B15.3	4.43e-05	1.564	1.57251	0.50396	0.468375
LAP3	4.43e-05	39.7065	34.2065	19.8976	19.3663
RP11_455J20.3	4.43e-05	0.253299	0.235405	0.0572062	0.01446
COL18A1	4.43e-05	1.60429	0.08912	1.75651	1.95939
CDK9	4.43e-05	58.9413	66.6538	27.2171	27.6039
PTGES	4.43e-05	0.127844	0.120425	0.0443625	0.044155
RP5_1160K1.6	4.43e-05	9.01745	9.5378	2.81027	0.056955
HERC2P7	4.43e-05	3.47334	1.3799	3.75629	3.20775
COL8A1	4.43e-05	0.385111	0.022285	0.801759	0.73612
GLB1L2	4.43e-05	0.154693	0.013825	0.137802	0.1167
SYCP2	4.43e-05	0.627079	0.07895	0.632762	0.578605
HAVCR1	4.43e-05	0.28825	0.02774	0.460534	0.42761
PLCB2	4.43e-05	5.97437	6.72875	0.255252	0.10002
TMPRSS13	4.43e-05	0.0278528	0.013605	0.145868	0.146655
TP53TG1	4.43e-05	7.69984	5.10899	15.1676	14.5818
RP1_122O8.7	4.43e-05	2.73316	2.95402	1.17488	1.09159
CYGB	4.43e-05	2.6661	0.12557	3.355	3.30786
KCNQ4	4.43e-05	0.693898	0.169355	0.0608306	0.0111
C1QTNF6	4.43e-05	0.723311	0.376935	1.48273	1.43677
OSBPL11	4.43e-05	8.85589	8.95311	17.3642	17.6251
TRIM32	4.43e-05	5.72336	6.32735	1.51053	0.051845
RP1_40E16.12	4.43e-05	0.432523	0.34479	2.85321	1.80347
GRN	4.43e-05	55.7272	49.9807	22.9098	18.5697
IRX3	4.43e-05	2.33756	0.025085	3.11605	3.47707
ARHGEF17	4.43e-05	1.5357	1.50643	0.145161	0.03423
TNFSF13B	4.43e-05	0.739142	0.31732	2.34117	2.18054
ZNF432	4.43e-05	2.40091	2.20831	4.44306	3.9256
AC137934.1	4.43e-05	1.15913	0.80548	2.14338	2.02543
ZNF680	4.43e-05	4.25682	4.09031	1.55557	0.52501
CHD6	4.43e-05	6.83941	7.44754	12.5052	11.7495
SH3RF2	4.43e-05	0.198073	0.01334	0.145668	0.137525
MECOM	4.43e-05	0.28843	0.015345	0.665926	0.659595
CEBPA	4.43e-05	5.19343	0.721265	7.63487	7.20439
IRAK1	4.43e-05	76.0622	72.1671	45.0695	42.6461
PTPRS	4.43e-05	1.3044	0.046745	2.36287	1.93941
LENG8_AS1	4.43e-05	4.14649	4.05415	10.2103	9.03045
AP3M2	4.43e-05	6.33522	6.18919	1.91383	0.108295
RP11_16F15.1	4.43e-05	1.56324	1.35859	0.708214	0.739925
SMIM22	4.43e-05	0.349951	0.089275	0.786319	0.646195
MIR4519	4.43e-05	8.42481	6.00687	2.03734	0.819195
WDR72	4.43e-05	0.191366	0.00874	2.72505	1.03991
UBE4B	4.43e-05	11.0766	11.2154	4.03834	1.92188
EIF2AK2	4.43e-05	15.3522	13.331	24.759	25.1323
RBM27	4.43e-05	11.1665	10.9667	5.2037	4.57731
PRKAA1	4.43e-05	13.6194	15.1532	32.8967	24.4781
ZDHHC21	4.43e-05	1.63801	0.81174	5.25308	4.01816
TOB2	4.43e-05	13.1359	12.7454	19.422	18.614
CTC_559E9.6	4.43e-05	1.66274	1.69325	3.07174	3.30594
RAP2B	4.43e-05	5.3055	5.47002	8.19274	7.32221
MGA	4.43e-05	7.29605	7.31351	1.84693	0.08072
CHL1	4.43e-05	0.291983	0.009815	0.248376	0.20451
ANKRD36	4.43e-05	4.04294	3.43172	1.27531	0.89675
IGHG1	4.43e-05	110.432	0.45977	0.07391	0.03118
UBN2	4.43e-05	2.81741	2.86061	6.70056	5.92493
PUS1	4.43e-05	23.0526	21.8443	14.335	13.7949
RP4_791M13.3	4.43e-05	0.497027	0.44676	1.53999	1.61352
MGST1	4.43e-05	1.81648	0.093185	1.16635	1.09756
IER5L	4.43e-05	0.830666	0.246005	0.929513	0.94719
GTF2IRD1P1	4.43e-05	3.26329	3.11573	6.01792	5.65597
TNIK	4.43e-05	2.31621	0.107815	2.7952	2.63303
NCBP2_AS1	4.43e-05	13.8367	13.676	8.98614	9.26603
TSPAN8	4.43e-05	0.143182	0.082585	0.0426669	0.01218
ASB7	4.43e-05	4.17043	4.32767	7.41368	6.92124
SLC35B4	4.43e-05	7.45067	7.57137	11.1069	10.6371
SH3BGRL2	4.43e-05	0.1205	0.02384	0.477591	0.358525
AC073869.1	4.43e-05	0.267657	0.145235	2.478	1.48276
HIVEP1	4.43e-05	2.03471	1.32567	0.430216	0.13302
RP3_402G11.27	4.43e-05	1.49135	1.33244	0.67585	0.38396
FAM221A	4.43e-05	1.02609	0.9277	24.909	27.1579
TRGC1	4.43e-05	0.196401	0.013335	0.930686	0.52198
UBE2D3	4.43e-05	56.8372	55.5562	71.9587	68.7846
FBLN1	4.43e-05	1.79042	0.108025	2.70074	2.08564
MAPRE1	4.43e-05	92.1264	85.1909	127.244	119.372
HLA_DQA1	4.67e-05	31.6742	2.15372	0.424473	0.02713
MAFB	5.01e-05	0.01914	0.01209	1.2978	0.47213
AC098820.2	5.03e-05	0.668881	0.68473	0.671938	0.02779
JAG1	5.03e-05	0.702473	0.15597	3.5356	2.95482
CCR9	5.03e-05	0.617092	0.020055	2.08583	1.65899
GRB7	5.38e-05	0.303783	0.051715	0.785966	0.922835
CDPF1	5.38e-05	5.18124	4.78282	9.07925	9.07616
RP11_206F17.2	5.38e-05	0.502618	0.466485	1.10605	0.132425
USP20	5.38e-05	7.95375	7.3373	13.5192	13.3995
DGCR2	5.38e-05	14.3554	15.1672	6.65865	5.65261
RPL12	5.38e-05	359.103	355.004	218.099	211.346
AC084219.4	5.38e-05	6.21526	5.49904	3.04186	0.273565
CLDN3	5.38e-05	0.0480089	0.049955	0.106371	0.086195
GLRX	5.38e-05	29.0754	27.106	14.8654	15.2686
CTD_2267D19.6	5.38e-05	1.18966	1.25466	2.27803	2.17855
MMP24_AS1	5.38e-05	4.25069	3.73468	1.51758	0.16235
DDX50P1	5.38e-05	0.26505	0.244275	0.0713706	0.03599
PPP3CC	5.38e-05	18.6248	16.6077	7.4667	7.17212
RP13_516M14.1	5.38e-05	3.5279	3.3805	1.416	1.56904
RP11_80G7.1	5.38e-05	0.677993	0.704725	16.0214	6.01602
ANKRD23	5.38e-05	0.869168	0.74369	0.314834	0.06294
DGCR11	5.38e-05	0.695921	0.68389	0.254451	0.185105
WWC1	5.38e-05	0.424346	0.055655	1.6931	1.35443
AC027601.1	5.38e-05	3.86198	3.87541	6.91678	5.98402
HMGB1P3	5.38e-05	2.77677	1.83445	7.2317	5.53027
CTD_2336O2.1	5.38e-05	1.83943	1.93226	5.1666	3.93307
PDE8B	5.38e-05	0.198891	0.06256	0.636315	0.57274
RP1_30M3.6	5.38e-05	0.522398	0.533825	10.8177	9.41626
RP11_109L13.1	5.38e-05	3.60332	3.14303	1.00628	0.095205
LYRM1	5.38e-05	6.53344	6.45567	10.8052	10.4998
RP5_1099D15.1	5.38e-05	1.60483	1.64187	6.60597	4.30683
PMS2	5.38e-05	9.41224	9.97479	15.0084	15.55
ATP1B1	5.38e-05	1.91975	0.768995	0.249122	0.093715
RIPK4	5.38e-05	0.100458	0.0277	0.197047	0.14263
SNRNP48	5.38e-05	14.4298	13.3168	25.9097	26.5084
SIPA1	5.38e-05	27.1429	23.5974	9.03246	6.09014
NT5C3B	5.38e-05	15.2199	13.5323	6.06316	5.70763
COQ10A	5.38e-05	11.3741	10.8403	32.9242	26.3061
AC107016.2	5.38e-05	4.15432	1.92501	1.07134	0.26554
TXNL4B	5.38e-05	8.30183	8.44102	5.85604	6.04767
RP11_160E2.11	5.38e-05	0.537749	0.434185	1.83962	1.51283
IMP4	5.38e-05	68.1368	64.1914	42.3056	40.8902
CD27	5.38e-05	7.72842	0.85284	9.93275	10.1372
RSF1	5.38e-05	5.44592	5.52351	1.57642	0.247195
CINP	5.38e-05	6.77499	5.54599	12.9488	12.308
AIF1	5.38e-05	21.6851	2.86823	130.943	123.259
SEPSECS	5.38e-05	3.47758	3.52289	1.62137	1.39443
RP11_562A8.4	5.38e-05	3.11604	3.16549	5.5679	5.2046
RP11_133O22.6	5.38e-05	0.264223	0.270965	0.970541	0.776055
GABRR2	5.38e-05	0.580369	0.324575	1.15297	1.12793
GFRA1	5.38e-05	0.205638	0.012095	0.338255	0.32952
BLZF1	5.38e-05	3.33971	3.24751	1.49336	0.36936
ZNF732	5.38e-05	0.0835672	0.043215	0.318425	0.280405
VSIG10L	5.38e-05	0.406506	0.32923	0.100682	0.068935
RP11_723O4.9	5.38e-05	1.37862	0.995675	3.40539	3.08207
RP11_114F3.5	5.38e-05	0.806425	0.605005	7.36684	7.33289
MPZL2	5.38e-05	0.317134	0.05707	0.353076	0.27998
TMEM117	5.38e-05	2.24036	2.15733	4.47694	4.34464
ATAD1	5.38e-05	11.7274	11.922	17.6284	18.1008
THUMPD3	5.38e-05	11.97	12.0821	16.8185	17.383
MTX1P1	5.38e-05	7.78884	7.05409	12.7002	12.9327
LL0XNC01_240C2.1	5.38e-05	1.79933	1.61833	0.891279	0.22011
RP11_134E15.2	5.38e-05	4.66538	4.81658	1.65505	0.026795
KIAA1432	5.38e-05	16.1644	15.0237	8.48308	8.11215
ATP6AP1L	5.38e-05	0.617671	0.413025	2.31065	2.28058
G6PC3	5.38e-05	26.4819	22.8403	14.1738	14.8684
AIFM3	5.38e-05	0.127578	0.018125	0.230854	0.19768
ZNF408	5.38e-05	6.12804	5.69191	9.32665	8.70621
GSTT1	5.38e-05	1.44527	0.127465	3.20164	2.81201
RP11_301G19.1	5.38e-05	9.15697	1.59917	10.4284	9.52184
NMNAT3	5.38e-05	0.195061	0.024945	0.971026	0.1775
IGJ	5.38e-05	200.184	58.8304	1.14186	0.60213
RP11_305K5.1	5.38e-05	0.594336	0.4862	0.14971	0.055755
SSC5D	5.8e-05	0.159601	0.14214	0.03169	0.009845
LINC00473	5.8e-05	0.0061339	0.00538	0.281569	0.073165
RYR1	5.82e-05	0.104225	0.002945	0.0993756	0.08725
VDAC1P4	6.26e-05	0.0592361	0.06478	0.0095425	0.004725
UNC5CL	6.5e-05	0.704741	0.74098	0.247176	0.13941
FYB	6.5e-05	1.48945	0.05126	1.67997	1.66911
ZBTB32	6.5e-05	5.24083	0.113545	8.5418	7.88403
UBE4A	6.5e-05	13.5875	12.6058	7.43147	7.14438
HS3ST1	6.5e-05	0.241739	0.021795	0.862566	0.503425
STAM	6.5e-05	6.73629	6.52423	2.19648	0.151835
FAM109A	6.5e-05	2.52096	2.58525	5.52735	4.98719
ARPC4	6.5e-05	50.0396	41.7957	22.2673	20.818
RP11_141C7.3	6.5e-05	1.25544	0.808765	6.22157	4.85287
SWAP70	6.5e-05	16.7324	14.826	4.98823	5.23987
TTC21A	6.5e-05	0.904396	0.69322	0.224996	0.04779
SLC6A4	6.5e-05	0.200256	0.036885	0.292398	0.2567
NPM1P26	6.5e-05	0.583074	0.487645	4.54769	3.75472
NEDD4L	6.5e-05	1.6112	1.45684	6.23687	5.95937
RP1_265C24.5	6.5e-05	0.30539	0.237935	1.05392	0.670215
ANGPT2	6.5e-05	0.193831	0.020245	0.782322	0.633335
MTL5	6.5e-05	1.46841	1.20161	0.070625	0.06882
PLCXD1	6.5e-05	13.6714	9.96809	26.511	27.5106
NUP35	6.5e-05	7.71773	7.41986	4.96175	4.63218
RP11_6N17.6	6.5e-05	5.5936	5.30849	9.83381	8.78403
RP11_611E13.2	6.5e-05	2.4293	2.29695	0.785426	0.353845
GPATCH4	6.5e-05	48.1327	43.7143	24.0093	20.4503
APOBEC3B_AS1	6.5e-05	3.59383	3.02203	0.505494	0.06127
MORN2	6.5e-05	3.29018	2.96921	15.9694	14.8923
RP11_90B9.2	6.5e-05	0.304708	0.322475	1.6403	1.26687
AC074183.4	6.5e-05	0.632477	0.65913	0.376202	0.032845
MALSU1	6.5e-05	15.4395	14.7489	3.9021	0.05613
RP11_368P15.3	6.5e-05	4.74017	3.81352	8.27457	7.77792
AXIN2	6.5e-05	1.1739	1.3161	0.312863	0.045185
RP11_384K6.2	6.5e-05	5.71407	6.0359	2.43802	2.08308
CPLX1	6.5e-05	0.207236	0.02439	0.44005	0.259355
RP11_151F5.2	6.5e-05	2.48732	2.02491	0.767271	0.08176
SETD1A	6.5e-05	13.7775	14.6545	73.4777	58.1932
CTD_2002J20.1	6.5e-05	1.45777	1.5994	0.772426	0.6845
TEX19	6.5e-05	1.67128	0.5695	2.3755	2.25786
ATXN2L	6.5e-05	65.2136	65.5508	94.6365	90.1693
PTPN7	6.5e-05	17.3382	10.0898	51.6374	49.9472
LIX1L	6.5e-05	15.0955	13.7685	57.163	55.3991
PTK2B	6.5e-05	58.541	58.0123	19.184	18.5338
RP11_697E22.1	6.5e-05	2.13521	1.55575	0.942916	0.37477
SNAP47	6.5e-05	9.10586	8.96223	3.64583	2.50244
KLHL2P1	6.5e-05	0.217412	0.210455	0.491183	0.46949
RP11_343H19.2	6.5e-05	146.926	66.5406	7.51695	4.71117
CCDC106	6.5e-05	9.37173	9.16479	3.90989	0.78581
TAB3_AS2	6.5e-05	3.47601	3.64285	1.29446	0.763545
HARBI1	6.5e-05	1.82664	1.92389	7.19139	4.49557
VPS13A_AS1	6.5e-05	0.786387	0.68271	3.02167	3.4638
TFF3	6.5e-05	0.383136	0.152035	0.550261	0.49363
ARFGAP1	6.5e-05	19.6738	18.8638	31.7506	34.1007
DHX58	6.5e-05	5.66171	5.13789	7.44966	7.54711
RP11_144G6.12	6.5e-05	1.74781	1.36972	4.13232	3.70648
BIRC3	6.5e-05	6.56348	0.077705	5.70611	5.78702
GHDC	6.5e-05	6.8213	5.9038	2.21982	1.07056
RSBN1L_AS1	6.5e-05	2.04605	1.75935	5.11464	3.81073
FABP3	6.5e-05	0.412108	0.187235	0.0742113	0.041545
TTC9C	6.5e-05	10.8489	11.4866	24.0765	18.3019
UBR2	6.5e-05	7.44933	7.98799	15.2282	16.0755
ABHD1	6.5e-05	0.0583122	0.03381	1.85848	0.37884
FAM86B3P	6.5e-05	0.703113	0.70465	1.62296	1.41275
GRAMD3	6.5e-05	0.561604	0.04336	4.31453	1.77887
DEDD2	6.5e-05	6.84118	6.3667	11.5332	11.5302
PSMD10	6.5e-05	27.8603	26.0771	37.2871	36.7277
LINC00888	6.5e-05	5.15828	4.27846	2.10949	0.02938
EHMT2_AS1	6.5e-05	1.50405	1.57642	0.689015	0.66533
MTMR14	6.5e-05	18.928	18.9328	11.9125	11.9629
NEDD1	6.5e-05	10.0192	9.82012	16.7039	16.1389
S100P	6.5e-05	0.217477	0.173065	0.572067	0.476885
CTA_390C10.10	6.5e-05	0.771586	0.665545	0.458795	0.27559
RP1_99E18.2	6.5e-05	0.228411	0.182295	1.0107	0.84434
FMNL1	6.5e-05	26.3685	24.2476	54.5068	48.8806
METTL21B	6.5e-05	3.40314	2.5138	5.12632	5.21851
EXOG	6.5e-05	5.35276	5.29803	3.23431	3.12658
FNTB	6.71e-05	1.5892	1.48057	0.456381	0.045145
HIST1H2AB	6.71e-05	0.247993	0.283075	0.0406012	0.025445
RP11_366L5.1	7.24e-05	0.157238	0.154005	0.0166788	0.00932
ZNF841	7.24e-05	4.65356	3.69581	0.0702662	0.072695
GLRB	7.76e-05	0.0757422	0.0085	0.168208	0.119315
AC100791.1	7.76e-05	1.55859	1.38092	0.108204	0.02038
NEPNP	7.79e-05	0.08098	0.06311	2.27604	1.16881
RP11_804H8.6	7.79e-05	0.350394	0.224375	0.0697156	0.06816
SKIDA1	7.79e-05	0.530197	0.07346	0.713472	0.586075
HLF	7.79e-05	0.0142728	0.0074	0.395225	0.1816
RP11_196G11.4	7.79e-05	2.48631	2.22552	0.661454	0.319235
CXCL3	7.79e-05	0.0259822	0.007415	0.490843	0.133305
TMBIM6	7.83e-05	92.165	80.5211	127.253	127.196
RP11_182J1.5	7.83e-05	0.183276	0.195085	0.635532	0.455505
RP11_312J18.5	7.83e-05	1.5373	1.54067	0.719184	0.40459
PDXK	7.83e-05	4.96473	4.16946	8.85482	9.58949
USP36	7.83e-05	11.085	10.9879	4.77531	2.97056
RP11_549J18.1	7.83e-05	0.10234	0.098595	0.312096	0.28262
IER3	7.83e-05	10.2425	2.69737	12.1273	12.0739
FECH	7.83e-05	6.83927	6.52559	13.7451	12.456
PDZD2	7.83e-05	0.0580167	0.0521	0.0171125	0.010545
GLTPD2	7.83e-05	0.36181	0.3417	0.526358	0.05017
PNKD	7.83e-05	6.96861	4.73817	9.8356	9.80603
NF2	7.83e-05	7.74495	7.82805	5.01208	5.40664
RC3H1	7.83e-05	4.2989	4.0502	7.50944	7.03564
PLIN3	7.83e-05	42.9767	41.3662	15.6964	13.8395
RP1_56K13.3	7.83e-05	23.6488	21.9217	38.1605	34.6278
TSPAN2	7.83e-05	0.170742	0.01718	0.179208	0.16579
C9orf169	7.83e-05	0.98826	0.741885	4.85241	4.99295
C9orf85	7.83e-05	3.25518	3.09341	1.34568	0.499935
PLP1	7.83e-05	0.0211961	0.019425	0.0500919	0.04332
RP11_317N8.5	7.83e-05	0.539533	0.481245	0.278909	0.02075
RP11_210N13.1	7.83e-05	0.138336	0.10523	0.544077	0.530215
MDK	7.83e-05	97.6175	82.3277	10.7325	4.92011
ANKRD36B	7.83e-05	3.30765	2.98628	7.19734	6.56454
KIF9	7.83e-05	0.949686	0.916105	1.05786	0.051295
CTD_3193O13.13	7.83e-05	9.60887	9.9541	6.60672	6.7549
NDUFA2	7.83e-05	0.643591	0.53601	20.4915	17.8208
GGCX	7.83e-05	5.41865	4.76607	8.41165	7.74781
CD9	7.83e-05	67.4552	56.0286	4.31456	1.64837
CACNB1	7.83e-05	3.08242	2.83889	1.34772	0.133355
ANKRD65	7.83e-05	0.15922	0.06094	0.3976	0.37113
AC104451.2	7.83e-05	0.474851	0.48551	5.64557	3.50427
SHOC2	7.83e-05	18.1396	17.8256	9.52392	9.28913
LASP1	7.83e-05	31.348	28.7061	51.9546	48.9367
GNG4	7.83e-05	0.113394	0.019965	1.11849	0.2482
RP11_29H23.5	7.83e-05	8.48816	7.73766	13.6332	14.4009
WT1	7.83e-05	1.68048	0.74861	8.18239	5.13771
LYST	7.83e-05	1.16423	0.90133	0.268193	0.17315
CD86	7.83e-05	4.43073	0.245235	5.86474	4.92971
ZNF532	7.83e-05	0.250183	0.0253	0.326188	0.31146
DPH6	7.83e-05	1.02012	0.84867	0.636202	0.232465
RAB43P1	7.83e-05	10.0275	9.72778	18.1034	18.1339
MTHFD2L	7.83e-05	1.80314	1.4381	3.89522	3.94996
METTL12	7.83e-05	4.26687	3.8182	2.85266	0.85919
RASSF6	7.83e-05	1.72332	0.006975	1.73251	1.47402
WNK3	7.83e-05	0.0592567	0.01117	0.0637875	0.049585
RP11_463O9.1	7.83e-05	0.217096	0.202505	0.124858	0.01602
SERPINB9	7.83e-05	9.37095	2.80667	14.4075	11.7636
KCNMB3	7.83e-05	4.24703	1.1734	10.1888	7.73742
NAA25	7.83e-05	10.3252	10.6833	4.5468	2.98301
ZNF280D	7.83e-05	1.73206	1.74235	2.92506	2.5748
CD40	7.83e-05	14.7062	1.83312	13.0733	11.317
CBX8	7.83e-05	3.35524	3.03734	2.64408	0.078575
IL10RB_AS1	7.83e-05	8.05268	7.19266	20.1919	15.8689
MMS22L	7.83e-05	4.07639	3.83622	1.1367	0.10594
RSRC1	7.83e-05	7.36777	7.6104	4.34455	1.27008
AC074212.6	7.83e-05	1.72045	1.4725	0.396979	0.300135
AC000068.5	7.83e-05	0.871347	0.816615	0.596891	0.071045
EHD2	7.83e-05	0.889652	0.11659	0.0489819	0.04142
PSD	7.83e-05	0.356941	0.20373	0.863722	0.79765
CTD_2369P2.4	7.83e-05	15.2794	11.1137	17.4714	16.439
CYP2S1	7.83e-05	0.103234	0.029385	0.125861	0.105375
GCSAM	7.83e-05	20.905	20.0308	6.78623	0.527405
RABEP2	7.83e-05	11.9641	10.3594	6.60519	6.48159
PEX7	7.83e-05	2.0928	1.84888	1.16712	0.036265
CYR61	7.83e-05	0.465989	0.481115	0.181374	0.03553
RPL13AP20	7.83e-05	9.6069	8.65772	17.6285	16.0257
CCDC61	7.83e-05	4.22485	3.87397	1.71189	0.030145
PLXNA2	7.83e-05	0.998072	0.020875	1.02311	0.965925
FXYD6	7.83e-05	0.124886	0.016415	0.131235	0.11637
EGLN3	7.83e-05	0.331888	0.01497	0.397731	0.42022
CTD_2545M3.2	7.83e-05	8.05457	9.42941	19.9816	17.2998
TF	7.83e-05	0.136739	0.10324	0.448938	0.32352
CISD2	7.83e-05	11.3976	10.8642	20.7277	20.9773
LYPLA2P1	7.83e-05	1.80777	1.74037	1.56432	0.14428
SPAG6	7.83e-05	6.03139	0.114705	7.04486	6.47196
ARSB	7.83e-05	2.0411	1.88378	1.06892	0.32585
SYPL1	7.83e-05	25.5178	23.2225	58.359	58.5739
TRABD	7.83e-05	71.7576	68.1698	39.3171	37.3676
UBOX5_AS1	7.83e-05	0.284435	0.27684	1.76711	1.51947
TANGO6	7.83e-05	3.32362	3.18325	1.92131	1.75692
ANAPC15	7.83e-05	9.483	7.88716	17.8042	15.3339
GRIN3A	8.95e-05	0.0822967	0.08	0.0262331	0.0193
EPS8L1	8.95e-05	0.462529	0.136685	0.0444569	0.03621
RP11_296A18.5	8.99e-05	0.288336	0.27451	0.133424	0.126535
CTD_2270L9.2	8.99e-05	0.0690944	0.07103	0.024585	0.00574
AQP11	8.99e-05	0.594843	0.599155	0.173756	0.14481
HNRNPUP1	8.99e-05	0.372613	0.38133	0.0966812	0.08456
RPS11	9.4e-05	2163.9	1973.89	1419.45	1439.76
PNPLA7	9.4e-05	1.6349	0.630105	0.196544	0.033035
SLC25A22	9.4e-05	10.4115	9.31404	4.40605	3.13406
RP11_304F15.3	9.4e-05	0.491253	0.20056	0.735266	0.78536
ARRDC2	9.4e-05	17.5313	13.8325	6.66686	7.31471
ATP6V0D1	9.4e-05	24.3169	22.843	14.2934	14.2449
SPPL2A	9.4e-05	9.76414	8.03541	4.28947	3.66087
CDH23	9.4e-05	0.0417822	0.01386	0.742121	0.157115
CD58	9.4e-05	27.1227	21.7558	8.57698	6.21708
ZNF398	9.4e-05	5.21968	5.32203	3.90581	0.18536
FOXO1	9.4e-05	12.8626	12.7562	1.97012	0.85418
RP11_340I6.7	9.4e-05	0.548321	0.549675	1.06706	0.94005
DUSP23	9.4e-05	5.66898	0.110745	12.8811	7.90237
FBP1	9.4e-05	1.65532	0.09976	2.72216	2.56803
IDUA	9.4e-05	3.50572	3.84637	8.24068	7.86886
MCF2L	9.4e-05	0.141257	0.015775	0.199514	0.200605
IDH1_AS1	9.4e-05	0.549281	0.39302	0.25363	0.179875
DAAM1	9.4e-05	7.44077	6.17964	2.23181	2.01859
NTN1	9.4e-05	2.4244	0.50163	3.03831	3.14152
'SEPT7P2	9.4e-05	3.75386	3.78711	1.33861	0.818525
CX3CL1	9.4e-05	0.0632089	0.00928	0.107632	0.07353
ARHGEF9	9.4e-05	6.93056	6.98304	2.95103	1.61147
AC004041.2	9.4e-05	2.18721	1.71501	1.2098	0.10806
'MARC2	9.4e-05	0.53176	0.018575	0.797107	0.842955
RP11_104H15.8	9.4e-05	1.29138	0.609675	1.81153	1.92544
ITGA6	9.4e-05	13.99	3.10697	17.789	17.2248
HEATR5B	9.4e-05	8.50923	8.52154	3.74379	3.53608
AC104134.2	9.4e-05	10.9094	11.3536	5.43924	2.18073
RP11_386I14.4	9.4e-05	1.94145	1.57852	0.809534	0.294775
RP11_486O12.2	9.4e-05	0.398067	0.343635	0.511206	0.04918
MCM6	9.4e-05	77.0565	80.3002	103.056	101.534
RP11_989E6.10	9.4e-05	0.142736	0.114845	0.362676	0.299685
EXOC6	9.4e-05	4.58302	4.77575	11.8933	11.0502
NTRK1	9.4e-05	0.719562	0.163875	1.6007	1.58553
PEBP1	9.4e-05	194.792	193.59	101.512	94.6188
TMEM41A	9.4e-05	6.94221	6.15798	2.30427	1.29639
AC092835.2	9.4e-05	0.815658	0.78722	2.15546	2.00081
MANEAL	9.4e-05	9.12356	7.85057	3.42322	1.92704
HECW2	9.4e-05	0.14777	0.01125	0.151129	0.11438
LINC00933	9.4e-05	0.0811767	0.02213	0.165385	0.149475
YIPF2	9.4e-05	15.3626	12.9065	19.7683	20.2023
HLA_F	9.4e-05	17.846	10.1593	3.99575	0.890845
AC020910.2	9.4e-05	0.939467	0.888925	0.289412	0.05659
SIX4	9.4e-05	0.25696	0.01073	0.555038	0.45311
CTC_203F4.2	9.4e-05	2.82951	0.48651	4.99806	3.20682
NPR2	9.4e-05	1.20864	1.09852	0.360978	0.25176
GPR137B	9.4e-05	3.67329	1.66673	5.07357	5.28899
PLEKHM1P	9.4e-05	2.76075	2.42377	6.60335	6.37038
MAP3K11	9.4e-05	20.9019	20.9507	15.4427	15.4336
KB_1027C11.4	9.4e-05	1.55507	1.55224	0.813427	0.116925
FAM211B	9.4e-05	0.147109	0.02445	0.75868	0.287265
CLIP2	9.4e-05	25.4247	17.72	6.25182	5.84825
PCDH10	9.4e-05	3.79277	0.00704	3.00592	2.98901
DCAF15	9.4e-05	23.7201	22.6015	33.805	33.0322
AL591479.1	9.4e-05	0.276397	0.101925	0.891425	0.775705
KIF4B	9.4e-05	0.219582	0.224355	0.6538	0.36222
AC003104.1	9.4e-05	0.198361	0.157435	0.446636	0.403755
SUV39H1	9.4e-05	14.6174	13.7141	5.99633	3.5362
CMYA5	9.4e-05	0.0598244	0.05698	0.246615	0.22751
SORCS2	9.4e-05	0.393644	0.01749	0.606562	0.52992
RPL9P28	9.4e-05	0.0906111	0.089075	0.0282956	0.011685
FBXO30	9.4e-05	3.30748	3.62343	11.5563	11.3697
PMPCA	9.4e-05	20.9937	19.3093	14.8808	13.5754
C12orf65	9.4e-05	7.50901	7.6253	12.0037	11.3766
RN7SKP160	9.4e-05	0.0965039	0.081985	0.317258	0.246585
LINC00909	9.4e-05	4.32003	4.293	6.93602	6.89961
RP11_426C22.5	9.4e-05	0.783106	0.711815	1.68527	1.41548
AC016700.6	9.4e-05	15.0251	13.8642	8.07277	7.80718
SOX13	9.4e-05	0.706367	0.061425	2.50569	2.22071
PMM2	9.4e-05	16.5388	14.5061	10.646	11.097
ZIC5	9.4e-05	0.325688	0.005155	4.783	0.5122
NPNT	9.4e-05	1.26781	0.034785	1.56996	0.8278
EEF1B2	9.4e-05	756.021	718.18	513.691	494.373
CTD_2020K17.1	9.4e-05	2.43369	1.2472	9.21348	8.99428
LINC00896	9.4e-05	0.497906	0.066225	0.631032	0.48996
ZNF74	9.4e-05	5.33226	5.25249	4.99652	0.254305
LINC00899	9.4e-05	0.147683	0.064555	0.628493	0.404775
C21orf119	9.4e-05	2.86759	2.85187	0.950426	0.451015
TMEM92	9.4e-05	0.158522	0.05211	0.643419	0.518685
PVT1	9.4e-05	3.51943	3.30536	1.96043	0.216535
STRN	9.4e-05	7.95494	8.07831	31.352	15.8258
DNAJA4	9.4e-05	0.244248	0.057525	0.214782	0.1777
PACSIN1	9.4e-05	3.07	0.2	13.1144	8.90483
RP11_961A15.1	9.4e-05	4.23836	3.47208	2.16219	0.180145
SDC4	9.4e-05	0.824768	0.283595	0.811133	0.836665
NSUN4	9.4e-05	6.64458	6.84894	5.76236	1.26859
ACHE	9.4e-05	0.341641	0.011695	0.823032	0.36934
LMLN	9.4e-05	0.986553	0.901165	0.270196	0.166345
SHC4	9.4e-05	0.0494328	0.04519	0.169306	0.13443
CCDC14	9.4e-05	14.9241	13.8875	5.02311	3.80174
CYFIP1	9.4e-05	22.7202	16.8919	6.92014	3.02336
RP11_692D12.1	9.4e-05	0.262015	0.252515	0.628798	0.604905
IFNAR1	9.4e-05	9.50174	8.49496	18.3758	18.8734
NDRG4	9.4e-05	3.44487	0.9201	9.41718	8.19154
NOTCH4	9.4e-05	0.0846256	0.02572	0.663787	0.320855
AC002398.11	9.4e-05	2.81886	2.84072	4.51051	4.1078
ZNF821	9.4e-05	3.69779	4.01712	1.8602	1.6885
PTGER3	9.65e-05	0.0040006	0.003455	0.479755	0.012995
RNA5SP187	0.0001025	0.295236	0.258035	0.0075719	0.00327
MCHR1	0.0001033	0.0225717	0.0118	1.47651	1.03025
PCOLCE2	0.0001033	0.32004	0.01124	0.273126	0.278675
RP11_279F6.1	0.0001033	0.0179556	0.017085	0.104286	0.062105
LAG3	0.0001033	15.0701	0.01697	31.0662	24.2328
RP11_351M8.1	0.0001033	0.0837244	0.06206	0.0136175	0.00896
ZIC2	0.0001036	1.79297	0.26299	6.51913	6.49704
DPYSL4	0.0001036	2.75586	0.019485	3.05694	2.93863
CTD_2047H16.4	0.0001126	3.51779	3.45208	6.67162	6.42027
SELPLG	0.0001126	13.083	0.15	31.4444	16.9986
UQCC2	0.0001126	12.8356	13.776	22.1887	23.7285
CHRDL1	0.0001126	1.22996	0.01556	3.33557	3.52872
SNX11	0.0001126	11.0431	7.05082	13.0021	13.4467
NFU1	0.0001126	10.1309	8.21692	5.43533	5.11449
STARD7	0.0001126	92.572	91.2571	66.8923	66.621
RP5_1085F17.3	0.0001126	1.35987	0.725325	2.547	2.53308
COQ6	0.0001126	5.56108	5.90679	8.67674	7.83869
CREBRF	0.0001126	1.6041	1.66521	0.984518	0.13089
CRLS1	0.0001126	6.50761	5.70098	19.7187	17.5337
GPR158	0.0001126	0.212694	0.008845	0.252422	0.23744
WDR83	0.0001126	7.4833	7.41012	11.4853	11.6531
CTSZ	0.0001126	30.6187	12.0635	1.7612	0.53953
GLB1L	0.0001126	0.975433	0.938435	5.1141	3.97731
RP11_676J12.4	0.0001126	0.214391	0.18142	0.852081	0.77278
SRR	0.0001126	6.05505	5.99601	9.73627	9.39625
RN7SL268P	0.0001126	1.37969	1.02417	3.58379	3.43058
PIEZO1	0.0001126	28.2472	25.0927	50.3216	45.3549
ECHS1	0.0001126	71.8075	59.7697	38.8182	35.1706
NUDT13	0.0001126	1.51558	1.54557	0.772549	0.078545
HS6ST2	0.0001126	1.02367	0.04487	7.47457	2.91963
LINC00910	0.0001126	0.472674	0.44216	0.153573	0.077815
TNFRSF1A	0.0001126	7.8422	7.72318	19.8951	20.1911
ATG13	0.0001126	12.5665	12.4066	17.9868	17.2346
EGLN1	0.0001126	10.3225	9.92385	3.37094	0.4662
SERBP1	0.0001126	94.7044	94.376	68.9658	69.4779
DLG1_AS1	0.0001126	0.906279	0.86632	0.540991	0.089255
FAM72D	0.0001126	13.6555	11.6128	25.9774	25.0086
HCG4P11	0.0001126	19.5581	10.6526	4.72125	0.915635
LIN7A	0.0001126	0.458583	0.04635	0.487343	0.36264
TM4SF1	0.0001126	0.262538	0.226925	0.281096	0.045625
KIF21B	0.0001126	12.4202	10.8291	29.5113	29.358
RIMS2	0.0001126	0.0684278	0.005285	0.139224	0.128455
NADK	0.0001126	30.2011	29.0541	19.2137	19.2577
RP6_159A1.2	0.0001126	0.132609	0.13268	0.70451	0.589325
ZFAT_AS1	0.0001126	1.19052	1.16602	3.39806	3.00548
MT1X	0.0001126	140.942	63.5415	8.01302	5.26666
CTB_79E8.3	0.0001126	2.10871	2.01372	0.651027	0.069925
CCDC181	0.0001126	0.0936844	0.029215	0.274156	0.22895
HIST1H2BF	0.0001126	0.927669	0.686815	2.4085	2.74783
SLC25A44	0.0001126	5.96169	5.4149	2.03734	1.13705
FAM209A	0.0001126	0.39328	0.38242	0.128509	0.01842
ACAP1	0.0001126	29.7495	24.2066	67.6552	59.2395
SEMA7A	0.0001126	16.7313	0.32188	22.7618	9.3041
SRSF4	0.0001126	60.9593	60.7827	80.6424	78.2546
RP11_1415C14.3	0.0001126	11.2441	11.7237	3.32389	1.27696
DNAJC3	0.0001126	7.62623	7.16197	15.0532	13.0086
RP11_103G8.2	0.0001126	0.555271	0.52648	1.47859	1.32523
ZMYND8	0.0001126	18.7411	17.9125	9.08915	6.7351
C6orf89	0.0001126	9.62501	9.58643	13.058	13.4322
RP11_96D1.5	0.0001126	0.141274	0.10605	0.593704	0.63714
SBSPON	0.0001126	0.351753	0.29171	0.36812	0.011695
POLG	0.0001126	24.8924	25.7063	47.1681	37.4184
RPS18P9	0.0001126	1.43567	1.25226	0.732462	0.41782
VDR	0.0001126	2.60145	1.34841	0.941608	0.090395
STAT6	0.0001126	53.1575	54.8722	29.3281	27.5234
NCK1	0.0001126	5.33838	5.34185	3.18505	3.18355
Z97634.3	0.0001126	0.356802	0.292335	0.500848	0.066525
LINC00680	0.0001126	3.35946	3.20475	6.94428	5.48911
UQCRFS1P1	0.0001126	7.2162	6.64457	13.9515	12.3768
NDUFA5P11	0.0001126	0.314196	0.298595	0.0940206	0.021575
SPTB	0.0001126	0.331739	0.079105	0.597984	0.501995
MYH11	0.0001126	0.235899	0.16811	2.84634	0.595695
SRM	0.0001126	73.8593	65.4	39.5634	39.4948
CEP57L1P1	0.0001126	0.0715022	0.068565	0.027425	0.00783
ZNF417	0.0001126	5.21134	5.29852	1.71336	0.19428
PTPN3	0.0001126	0.679667	0.084995	2.30795	1.98788
RAB3A	0.0001126	1.7687	1.92281	0.685775	0.35321
RP5_1142A6.9	0.0001126	16.3663	14.043	30.5212	27.5512
FANCM	0.0001126	2.49692	2.54659	6.89192	5.85897
CLUH	0.0001126	36.9143	34.8376	21.4182	18.6565
PCCA	0.0001126	2.92036	2.81666	0.709123	0.16096
PDE9A	0.0001126	0.789255	0.15295	1.60677	1.1541
PSMD6_AS2	0.0001126	1.01102	1.01953	3.04411	2.83121
RP11_23P13.4	0.0001126	4.40182	4.18691	1.8985	1.05978
ANKRD18A	0.0001189	0.463369	0.012455	0.685649	0.681605
CD1A	0.0001194	0.480416	0.15955	1.95374	1.2707
RNA5S2	0.0001194	0.799656	0.612845	0.211201	0.140405
VWDE	0.0001194	0.215726	0.004445	0.299523	0.26874
ZNF703	0.0001194	2.21564	1.63472	0.265075	0.075335
SNX32	0.0001194	0.912099	0.64153	0.08518	0.018495
CD34	0.0001194	4.99773	0.031625	5.67612	5.94504
EYA1	0.0001194	0.337685	0.00537	0.561261	0.55922
IRF5	0.0001344	5.2145	2.0837	6.75393	7.10391
RP11_304L19.11	0.0001344	2.28581	2.28556	4.42209	4.26279
RPS4XP17	0.0001344	0.186385	0.178255	0.0571294	0.031595
SPG11	0.0001344	8.63914	8.77604	3.30495	1.26732
CTD_2589H19.6	0.0001344	1.23451	1.09048	0.297586	0.07607
ZFAT	0.0001344	3.04339	2.80003	7.88563	7.47508
GRINA	0.0001344	41.2605	32.1911	11.0052	1.6538
GGT7	0.0001344	1.54646	0.394915	3.91432	3.40001
IL17D	0.0001344	1.59275	1.32993	6.08179	6.5499
OCIAD1	0.0001344	30.5437	30.0138	39.0515	39.03
NANS	0.0001344	10.3845	9.78578	4.66214	3.29658
AGO3	0.0001344	2.1343	2.30094	4.12956	3.69633
NFIA	0.0001344	0.339706	0.09061	13.0221	3.88207
HSDL2	0.0001344	9.92588	10.1291	17.0924	14.5211
MUC13	0.0001344	1.38384	0.03971	1.68681	1.69857
SERF1A	0.0001344	3.32371	3.40614	5.52711	5.49552
HIPK1	0.0001344	12.3378	12.1735	20.877	20.5454
AFAP1_AS1	0.0001344	1.50792	0.03357	1.64757	1.53856
RP11_385F5.5	0.0001344	1.49963	1.13583	4.53843	3.57
RDH10	0.0001344	1.50728	1.10293	2.99611	2.89504
DTX2	0.0001344	4.77648	4.4799	1.91414	0.9369
POLE2	0.0001344	9.50516	9.20228	3.96798	3.27256
MYEOV	0.0001344	0.854794	0.056265	1.02517	0.911385
ZHX3	0.0001344	2.27308	2.16851	4.40507	3.96066
ARID5A	0.0001344	29.0122	25.2497	10.4641	9.8264
HDAC4	0.0001344	2.59026	2.84491	5.62447	5.27807
GS1_124K5.2	0.0001344	1.1059	1.21085	0.420996	0.317875
[truncated: 18,173 more rows]

## Sheet: CTRP
gene	p	BALL_mean	TALL_mean	BALL_median	TALL_median
PIK3AP1	8.01e-07	10.5757	5.42868	10.6452	4.8296
TFEB	8.01e-07	7.62268	5.59992	7.54183	5.42416
CDKN1A	8.01e-07	9.01699	5.5619	8.98078	5.49469
ZEB1	8.01e-07	6.6133	8.29216	6.8939	8.10556
ZCCHC7	8.01e-07	11.2392	8.7297	11.4307	8.7806
CD3G	8.01e-07	4.33577	10.8904	4.29871	11.0981
LRRK1	8.01e-07	7.17005	5.39811	6.98877	5.3772
LAT2	8.01e-07	11.1577	5.47726	11.2319	4.52955
CD5	8.01e-07	5.09871	7.58617	5.11869	7.85612
SLA2	8.01e-07	4.63727	6.62237	4.61444	6.65612
CD3D	8.01e-07	4.13381	12.7458	4.1318	12.6775
TMEM62	8.01e-07	5.37944	4.68997	5.43751	4.6391
NEIL3	8.01e-07	8.24834	10.8362	8.57694	10.8927
ITK	8.01e-07	4.06221	9.92807	4.08977	10.0358
NUCB2	8.01e-07	10.8265	12.5518	10.8724	12.6113
LCK	8.01e-07	7.66137	11.7117	7.76136	11.7698
NCF4	8.01e-07	10.0217	4.01849	9.77244	3.92542
UBASH3A	8.01e-07	3.77511	7.76276	3.78431	8.45363
UNC93B1	8.01e-07	6.88876	5.04036	6.78446	4.99415
LOC100130458	8.01e-07	9.35843	3.92675	9.41079	3.89731
ZNF296	8.01e-07	7.17995	4.68607	7.12479	4.72345
VRK2	8.01e-07	9.75947	8.17041	9.83926	7.95164
MEF2C	8.01e-07	11.5657	5.3794	11.7883	5.03038
BCAS4	8.01e-07	8.09531	5.50085	8.10259	5.46985
DRAM1	8.01e-07	7.69277	5.39323	7.78083	5.33294
TRAT1	8.01e-07	3.69944	9.54356	3.45065	9.82527
CD163L1	8.01e-07	7.47563	4.26275	7.70841	4.16302
NDFIP1	8.01e-07	6.1264	9.47554	6.28427	9.45396
PDIA6	8.01e-07	12.7782	11.5372	12.6807	11.5485
LOC728175	8.01e-07	7.90931	3.82518	8.59177	3.79323
HEXIM1	8.01e-07	8.15952	9.04327	8.12519	8.85549
ZAP70	8.01e-07	7.45326	10.3133	8.27334	10.3971
GSE1	8.01e-07	8.53938	10.5672	8.55563	10.5531
ZEB1AS1	8.01e-07	6.20455	8.13564	6.54115	8.08961
AQP3	8.01e-07	5.33901	8.21976	5.25257	8.24502
LOC100505564	8.01e-07	3.97196	3.42343	3.81028	3.44234
PHACTR1	8.01e-07	9.02238	4.08422	8.91786	4.04303
PRKCQ	8.01e-07	7.1184	9.51289	7.60738	9.6804
PAOX	8.01e-07	8.04355	5.09484	8.14092	5.12118
HLADRB1	8.01e-07	11.4889	5.86403	11.5339	5.92157
TOX	8.01e-07	5.02946	9.02765	5.31366	9.00775
ANXA1	8.01e-07	4.27081	8.46487	4.0915	8.06205
NUDT16	8.01e-07	5.17503	4.30433	5.14748	4.26226
GATA3	8.01e-07	5.16068	9.28896	4.37362	9.56729
VANGL1	8.01e-07	5.72307	9.08887	5.40944	9.05526
MAGED2	8.01e-07	8.06361	8.97623	7.90587	8.9473
S100A13	8.01e-07	8.53701	5.17121	8.22802	5.15459
HEMGN	8.01e-07	3.63571	5.68959	3.61478	5.27962
LAMC1	8.01e-07	9.01591	4.84329	8.98771	4.6966
SNX2	8.01e-07	11.5637	9.77937	11.4849	9.76473
HLADPB1	8.01e-07	5.72475	3.68899	5.76316	3.69723
SYK	8.01e-07	9.11247	4.94524	9.0726	4.42508
SGK223	8.01e-07	9.9405	6.44298	10.2346	7.07293
PDLIM1	8.01e-07	12.7517	6.63162	12.905	5.77051
PTP4A2	8.01e-07	11.0776	12.5595	11.1058	12.4736
CD7	8.01e-07	4.33854	8.80596	4.32054	8.75711
BTK	8.01e-07	9.67421	4.82073	9.95503	4.78661
TST	8.01e-07	10.3728	5.73768	10.3272	4.90015
HLADRA	8.01e-07	12.3653	4.12572	12.3093	4.08991
RYK	8.01e-07	5.16	8.31134	4.7488	8.41386
BCL11B	8.01e-07	5.37979	10.1576	4.54293	10.3815
CDK14	8.01e-07	9.21977	5.42524	9.06595	5.31351
INSR	8.01e-07	8.19143	6.10068	8.25003	6.34655
SSBP3	8.01e-07	6.70752	8.87801	6.55378	9.1226
FYB	8.01e-07	3.78315	8.60822	3.79851	9.40032
HLADPA1	8.01e-07	11.9552	4.35268	12.1759	4.32336
HLADMA	8.01e-07	9.9008	5.77727	9.97226	5.86681
GNG7	8.01e-07	8.41232	4.79654	7.89316	4.59815
SH2D1A	8.01e-07	4.23533	10.4013	4.21036	10.407
LOC100505501	8.01e-07	7.10017	9.74318	7.56628	9.79102
CD74	8.01e-07	9.60094	5.43348	9.42292	5.44232
EBF1	8.01e-07	11.4512	4.51261	11.6175	4.0271
SLC26A9	8.01e-07	6.27624	4.42688	6.41536	4.4532
CD3E	8.01e-07	4.39365	9.69175	4.47519	9.51987
LYSMD1	8.01e-07	5.98011	7.4757	6.12102	7.49714
PPP1R1C	8.01e-07	4.15268	7.10618	4.14106	7.50766
COG1	8.01e-07	7.84274	8.7963	7.83614	8.69799
EPHB6	8.01e-07	4.57735	8.87242	4.79149	8.64227
CD19	8.01e-07	10.8907	4.47107	10.8027	4.33942
LOC284900	8.01e-07	5.63773	6.95773	5.60671	6.92694
TLE3	8.01e-07	4.95728	7.44531	4.73688	7.33667
SCARB1	8.01e-07	8.89671	7.19338	8.76953	7.32124
FMNL2	8.01e-07	9.39955	5.37255	9.28715	4.26156
KMO	8.01e-07	5.81499	4.15567	5.40986	4.16716
CD22	8.01e-07	8.01944	4.38761	8.08956	4.42209
CD58	8.01e-07	10.594	8.1544	10.4735	8.0058
TLR1	8.01e-07	7.28252	3.84362	7.37798	3.73298
LOC100507600	8.01e-07	4.13656	7.82306	4.08264	8.09585
LSR	8.01e-07	6.52517	4.20554	6.41463	4.22884
MAP3K5	8.01e-07	9.05182	5.58303	9.00469	5.34041
CSF2RB	8.01e-07	8.64165	4.51544	8.75659	4.58611
CCDC50	1.6e-06	7.66592	4.8143	7.67807	4.4491
CORO2B	1.6e-06	6.46284	3.74466	6.54043	3.75764
TPST1	1.6e-06	7.16581	5.23664	7.07885	5.09811
EAF2	1.6e-06	9.90809	7.43607	9.66776	7.67456
HLADOA	1.6e-06	5.78602	4.31915	6.00431	4.23647
TRPC4AP	1.6e-06	7.36271	8.3178	7.32938	8.31233
HLADMB	1.6e-06	8.11404	5.67299	8.39065	5.55615
EVC2	1.6e-06	4.70881	3.8313	4.73464	3.81919
FCGBP	1.6e-06	4.10878	6.09035	4.13426	5.91474
KIAA0930	1.6e-06	8.50435	7.23846	8.47306	7.28845
CEP85L	1.6e-06	5.67976	7.33359	5.72971	7.28745
THEMIS	1.6e-06	3.63791	8.61726	3.61541	9.39634
NCK1	1.6e-06	8.77368	9.58752	8.78559	9.57574
NXPE3	1.6e-06	5.86279	7.2928	5.94925	7.10885
LAT	1.6e-06	5.40693	9.53985	5.438	9.63297
MILR1	1.6e-06	9.109	4.81777	8.91675	4.77857
RIPK2	1.6e-06	8.35757	5.70697	8.40473	5.05842
KANK2	1.6e-06	8.45761	6.00223	8.46315	5.94051
KIAA1432	1.6e-06	7.71573	6.5691	7.81596	6.62054
ICOS	1.6e-06	3.90815	6.60561	3.89642	6.4086
STRBP	1.6e-06	9.6851	8.52365	9.60313	8.46664
AMZ2P1	1.6e-06	4.43972	7.38786	4.14308	7.51219
MSRA	1.6e-06	8.60275	6.18692	8.87523	5.9811
TESPA1	1.6e-06	6.19704	8.81857	6.25607	8.86958
ID3	1.6e-06	11.6477	9.21702	11.6513	9.23555
TMEM220	1.6e-06	7.32997	4.14566	7.42233	4.01596
CXorf21	1.6e-06	10.3371	4.37726	10.4944	4.03919
FCRLA	1.6e-06	6.4871	3.69739	6.01108	3.68011
FAM222B	1.6e-06	7.08043	7.72631	7.04524	7.67953
LAPTM5	1.6e-06	12.3996	9.82334	12.4309	10.3756
SNX22	1.6e-06	5.84617	4.46599	6.13184	4.48576
SAMD13	1.6e-06	5.46276	7.52901	5.11523	7.46709
SLC40A1	1.6e-06	4.10262	9.36616	3.82889	9.61338
ZNF114	1.6e-06	6.56779	3.84905	6.94939	3.85557
LOC100506776	1.6e-06	5.82069	9.52605	5.63751	9.07316
ZNF382	1.6e-06	4.58125	6.72221	4.50105	6.73873
ENG	1.6e-06	6.45227	4.36442	6.33257	4.27738
ZC3H12D	1.6e-06	8.69492	4.11776	8.98816	3.77582
ZNRF1	1.6e-06	8.12289	9.56517	8.23109	9.52666
CD79B	1.6e-06	9.74328	5.27104	10.0431	5.40881
FPGS	3.21e-06	8.36556	7.12356	8.27315	7.17096
RHBDF2	3.21e-06	6.72788	5.24588	6.67393	5.18964
MAL	3.21e-06	4.88567	9.83881	4.62513	10.1216
ZNF529	3.21e-06	6.03416	6.94607	6.04598	6.89573
USP44	3.21e-06	4.07572	8.6893	4.04031	9.10834
FAIM	3.21e-06	10.2999	6.33218	10.3548	6.16197
ACAP1	3.21e-06	6.42525	7.71567	6.47804	7.79898
GFI1	3.21e-06	5.85966	7.46943	5.84503	7.52678
LRMP	3.21e-06	12.1861	8.97909	12.2446	9.12903
ECM1	3.21e-06	8.08846	5.34721	8.45136	5.34976
POU2AF1	3.21e-06	11.5006	7.71309	11.5676	7.78839
JUP	3.21e-06	9.82083	6.04076	9.72993	5.58168
UNC5CL	3.21e-06	5.35803	6.49588	5.39439	6.46961
WDFY4	3.21e-06	5.13784	4.11323	5.17805	4.05703
TFDP2	3.21e-06	8.29764	11.0956	8.33482	11.2739
CAPN5	3.21e-06	5.33371	5.74764	5.36142	5.68239
PLCG2	3.21e-06	10.5538	6.93803	10.6547	6.95696
ATP2A3	3.21e-06	6.96376	9.13559	6.71931	9.21023
CHST15	3.21e-06	7.98646	4.58211	8.08405	4.44658
KIAA1033	3.21e-06	9.97283	8.76525	10.0071	8.80657
SOCS7	3.21e-06	7.07474	8.28794	7.38998	8.18603
ADCY9	3.21e-06	6.38698	4.73809	6.28198	4.80127
NBR1	3.21e-06	7.84916	9.18004	7.72783	9.04829
SAYSD1	3.21e-06	6.63757	8.10065	6.76983	8.16311
FLT3	3.21e-06	8.80913	4.72335	9.3093	4.61951
C20orf112	3.21e-06	7.0887	8.24381	7.17464	8.15138
CCDC85B	3.21e-06	6.19011	5.38628	6.15239	5.4222
BCL2L2	3.21e-06	5.52282	4.55028	5.54301	4.37336
SCPEP1	3.21e-06	9.05951	6.83009	8.85044	7.06594
CTSO	3.21e-06	7.56051	5.49027	7.53744	5.58755
TMEM117	3.21e-06	7.82314	5.07087	7.90429	4.82165
CD1E	3.21e-06	3.94759	8.88005	3.95595	10.5023
CXorf65	3.21e-06	4.8706	7.15853	4.77295	7.34402
VPREB3	3.21e-06	10.4871	4.23593	12.0179	4.22608
PBX4	3.21e-06	5.28946	6.9435	5.29964	6.97856
DPYD	3.21e-06	4.95244	6.5333	5.0287	6.44085
EVL	3.21e-06	8.89168	10.9582	9.10436	10.7465
SPI1	5.61e-06	5.81113	3.70983	5.9599	3.72773
TK2	5.61e-06	4.75629	5.41469	4.73016	5.44986
S100A1	5.61e-06	5.39359	4.35423	5.22259	4.3725
PRKCD	5.61e-06	7.14311	4.87249	7.20379	4.88845
FBXL20	5.61e-06	6.73996	7.39775	6.77742	7.45753
AIP	5.61e-06	9.06016	9.68719	9.10478	9.70137
MICALL1	5.61e-06	8.85406	7.2951	8.80459	7.38559
ZSCAN25	5.61e-06	6.98467	7.81675	6.95642	7.74658
ARPC5L	5.61e-06	10.1832	9.36666	10.157	9.336
ATXN3	5.61e-06	6.90319	7.75148	6.87753	7.70859
AUTS2	5.61e-06	8.13481	6.06222	8.21969	6.05659
MS4A4A	5.61e-06	4.58493	3.50466	4.38528	3.47414
RAI14	5.61e-06	8.5531	4.93147	8.62923	4.39397
TCF7	5.61e-06	4.68206	9.44644	4.09961	9.98683
TRIM38	5.61e-06	9.62668	8.13911	9.57366	8.0721
PVRIG	5.61e-06	6.40716	11.0341	5.65815	11.258
TGFBR3	5.61e-06	6.25517	4.60197	5.84978	4.57084
GAB1	5.61e-06	8.73166	5.08355	8.77423	4.86124
HLADRB6	5.61e-06	6.31071	4.80736	6.25357	4.72116
PRKCE	5.61e-06	7.75797	5.87598	8.02117	5.94025
SWAP70	5.61e-06	8.93166	6.30375	8.94875	6.36928
GSK3B	5.61e-06	7.71136	9.06742	7.6373	9.23382
NIPA2	5.61e-06	9.91543	9.14984	9.9252	9.06776
TOR4A	5.61e-06	6.22024	4.29819	6.64687	4.30983
GBGT1	5.61e-06	7.12617	4.36128	7.20358	4.31362
MYBPH	5.61e-06	5.61925	4.53895	5.06297	4.51762
TDRKH	9.62e-06	4.7586	6.03079	4.73155	6.11952
GRSF1	9.62e-06	8.67096	9.42822	8.62586	9.32898
OFD1	9.62e-06	10.6065	8.85346	10.5942	9.00551
PRDX1	9.62e-06	14.0668	12.7748	14.0951	12.7582
SERINC3	9.62e-06	9.75264	10.4072	9.8382	10.3114
ZFHX3	9.62e-06	6.76248	4.87778	6.61302	4.96567
C12orf77	9.62e-06	6.93573	3.887	7.1711	3.92992
IL2RG	9.62e-06	9.05026	11.2336	8.93596	11.2
TLR10	9.62e-06	6.87929	4.11106	6.78678	4.10936
SLC9A3R1	9.62e-06	8.30039	10.7921	8.59498	10.7609
OGFRL1	9.62e-06	7.23247	5.31228	7.34344	5.0935
IPP	9.62e-06	6.13003	7.36306	6.23862	7.3565
ARPC4	9.62e-06	8.9696	7.79219	8.88626	7.78864
MAFB	9.62e-06	4.52659	5.827	4.56512	5.44057
GALNT14	9.62e-06	9.50417	5.93448	9.87624	5.76951
SLIT1	9.62e-06	4.27842	6.96086	4.28149	7.35828
PRAF2	9.62e-06	7.39924	8.92422	7.68726	8.88285
FBLN5	9.62e-06	4.27899	6.39567	4.21659	6.51496
BEX4	9.62e-06	5.68992	9.80966	4.16358	10.1755
IFI6	9.62e-06	7.68094	9.1515	8.0247	9.00348
LOC100507392	9.62e-06	6.57221	5.64781	6.47714	5.67888
RASSF3	9.62e-06	8.57103	7.64156	8.61341	7.83643
LOC100507672	9.62e-06	6.0368	4.68446	6.07316	4.71971
SLC2A5	9.62e-06	7.52125	4.69185	7.77413	4.73796
TMCO4	9.62e-06	6.47385	5.29438	6.54417	5.27284
SLA	9.62e-06	5.2697	9.56213	4.6169	9.99798
N4BP2	9.62e-06	9.05059	9.92586	9.23214	9.8203
KIF16B	9.62e-06	7.59011	5.92495	7.56694	5.69466
DOK3	9.62e-06	8.82936	5.37364	9.13452	5.15531
MOB3B	9.62e-06	6.94141	4.99474	6.81271	4.93366
ATP6AP1L	9.62e-06	5.12562	7.90933	5.01652	7.89461
PTGS1	9.62e-06	5.35725	4.44152	5.09857	4.43224
DENND3	9.62e-06	7.57744	5.62146	7.64487	5.83164
FUOM	9.62e-06	7.19807	5.53304	7.0567	5.34778
KLC2	9.62e-06	4.97608	5.65752	4.98935	5.61373
MOB1B	9.62e-06	9.33593	10.6539	9.47932	10.7153
ACPL2	9.62e-06	7.0272	9.95871	7.03393	10.1872
PIP5K1B	9.62e-06	7.13603	4.22664	7.16912	3.969
ZNF101	9.62e-06	7.17875	8.82167	7.04619	8.96955
DNAJC27	9.62e-06	4.9809	5.76946	4.92343	5.84438
ANK1	9.62e-06	4.39623	3.99806	4.35892	4.01637
ZBED6CL	9.62e-06	5.62922	7.60443	5.26053	7.4888
SRRD	9.62e-06	9.73787	8.37903	10.0102	8.39618
ZNF619	1.52e-05	6.56551	5.96849	6.67887	5.94319
STAT3	1.52e-05	8.47163	9.72936	8.56154	9.72192
ARSD	1.52e-05	6.36909	4.69195	6.64453	4.64721
LOC646808	1.52e-05	7.44029	8.13952	7.40683	8.04409
GXYLT2	1.52e-05	4.84438	10.2186	4.60407	10.6116
CECR1	1.52e-05	6.01488	9.34004	5.71873	9.79111
PLCG1	1.52e-05	7.40331	8.56493	7.4505	8.5482
TRAK1	1.52e-05	7.32212	6.14547	7.33749	6.23211
SELPLG	1.52e-05	5.07998	6.88119	4.98816	6.64529
HMHB1	1.52e-05	7.71784	4.39123	7.93246	4.06253
TMEM221	1.52e-05	5.31909	4.46688	5.04785	4.45945
ZSCAN16	1.52e-05	7.8985	5.29714	7.94646	4.75956
SYNE3	1.52e-05	5.18203	4.36052	5.09408	4.33878
LAMP2	1.52e-05	7.24445	8.38309	7.33473	8.32928
ENTPD1	1.52e-05	5.07642	3.9004	4.47846	3.88054
PELO	1.52e-05	7.65517	8.54725	7.71057	8.49837
PELI3	1.52e-05	6.92459	5.42769	6.95612	5.23128
SAMD4A	1.52e-05	4.67794	3.97178	4.51973	3.96929
GATS	1.52e-05	5.66922	6.90045	5.52515	6.77466
CHD7	1.52e-05	9.29657	7.55611	9.39735	7.80849
RAB9A	1.52e-05	9.79899	8.77832	9.67972	8.73374
APOBEC3B	1.52e-05	9.32857	4.88263	9.27877	4.37786
PCMT1	1.52e-05	10.6201	11.1791	10.6706	11.1649
STIM1	1.52e-05	5.30547	6.75961	5.36515	6.80065
PLXNB2	1.52e-05	8.92125	5.16254	9.09487	4.76853
LY86	1.52e-05	9.20582	5.17229	9.92229	4.99925
CD8A	1.52e-05	4.1385	7.09749	4.13276	6.57947
PLXNB1	1.52e-05	6.57579	5.52791	6.36691	5.58483
CD6	1.52e-05	4.62779	6.5942	4.62873	7.04491
SOAT2	1.52e-05	4.86405	6.15393	4.82007	5.34853
TMIGD2	1.52e-05	5.84754	8.30094	5.8531	8.7979
FBXO25	1.52e-05	7.91237	9.37887	8.29059	9.39731
TSPAN7	1.52e-05	5.82444	10.6695	5.44679	11.5219
SCN8A	1.52e-05	4.38379	5.26244	4.34611	5.19071
SYS1	1.52e-05	6.57695	7.43362	6.56212	7.43646
HNRPLL	1.52e-05	6.06293	9.24675	5.37561	9.30652
EPDR1	1.52e-05	9.10959	9.89152	9.17067	9.90646
NCF2	1.52e-05	5.88318	4.11546	5.09925	4.07648
PSTPIP1	1.52e-05	4.57996	6.40186	4.53015	6.01142
EXOC4	1.52e-05	8.47449	9.21199	8.38031	9.09328
LINC00341	1.52e-05	11.3491	6.70638	11.6133	5.52431
PEX5L	1.52e-05	4.05027	5.42266	4.07729	4.74226
LOC100505725	1.52e-05	3.78967	4.47862	3.74633	4.23023
'MARCH3	1.52e-05	6.30913	4.63146	6.6356	4.51222
RASA2	1.52e-05	6.88442	8.38844	6.89227	8.40384
GGA2	1.52e-05	8.4116	6.48819	8.43641	6.49343
ELOVL4	1.52e-05	3.92012	8.66731	3.90052	9.27914
PPM1A	1.52e-05	7.38511	8.37211	7.42407	8.4155
FOXD2AS1	1.52e-05	4.08262	5.07916	4.05507	4.87033
LDLRAP1	1.52e-05	8.10146	6.20428	8.0261	6.10935
ZFP36L1	1.52e-05	8.76903	6.60945	8.84463	6.42508
FMNL1	1.52e-05	6.06904	7.14661	6.10073	7.19478
HSDL1	1.52e-05	7.87394	9.05573	7.79117	9.03299
LYN	2.4e-05	9.48685	4.82472	9.54884	4.44839
VAT1	2.4e-05	8.17808	9.84578	8.1511	9.82526
IL3RA	2.4e-05	5.60787	4.81216	5.52194	4.81855
SPNS3	2.4e-05	4.85898	7.91821	4.02297	8.07964
AMMECR1	2.4e-05	9.78431	8.04956	9.76794	8.01259
MOB3C	2.4e-05	5.82437	5.08072	5.83097	5.04248
ZDHHC18	2.4e-05	7.38391	7.82747	7.37949	7.83558
CRIM1	2.4e-05	7.58144	4.21024	7.65285	3.81032
MGC57346	2.4e-05	6.98996	8.03279	6.98646	8.03319
SLC24A6	2.4e-05	4.82825	5.64844	4.81548	5.6795
HEATR6	2.4e-05	5.88083	7.00126	6.05601	7.07587
RNF149	2.4e-05	9.05843	10.1824	9.28302	10.1725
NT5E	2.4e-05	6.02839	3.8491	6.53527	3.7902
GPRIN1	2.4e-05	5.67281	4.86424	5.61064	4.78903
MEF2D	2.4e-05	6.64337	5.76677	6.76745	5.69569
STAT5B	2.4e-05	7.3606	8.5004	7.47271	8.37244
DEDD2	2.4e-05	8.47395	9.28423	8.49009	9.28124
ZNF608	2.4e-05	9.65311	5.11241	10.2277	4.60851
NIF3L1	2.4e-05	10.1279	10.7632	10.1663	10.701
MVB12B	2.4e-05	5.22504	6.67375	5.27364	6.30158
TMEM121	2.4e-05	4.82031	3.78941	4.78993	3.74374
NUBP1	2.4e-05	8.70469	7.71302	8.71111	7.71783
PBX2	2.4e-05	4.86813	5.33263	4.8711	5.24373
ZMYND8	2.4e-05	10.4106	8.77644	10.6501	8.77276
LOC100131607	2.4e-05	6.99557	8.25467	6.841	8.36993
PACSIN3	2.4e-05	6.17924	5.04587	6.32847	5.05211
'SEPT1	2.4e-05	7.15019	9.08488	7.13837	8.94007
ALDH3B1	2.4e-05	5.33417	4.64088	5.26268	4.65878
TNRC6C	2.4e-05	5.18067	6.68171	5.01402	6.734
DERL3	2.4e-05	5.29331	4.39925	5.17552	4.33493
CTNNA1	2.4e-05	9.2235	6.17286	9.2705	6.28606
ITGB2	2.4e-05	7.19099	9.46826	7.20445	9.36228
IL1B	2.4e-05	7.77148	4.80146	7.55459	4.80412
C14orf64	2.4e-05	3.97511	5.16911	3.98014	5.36183
KAZALD1	2.4e-05	5.5111	4.63325	5.53851	4.55591
LOC100506844	2.4e-05	10.169	11.6663	10.2724	11.6458
MTA3	2.4e-05	7.6292	8.92067	7.57227	9.09417
OCIAD2	2.4e-05	6.7487	10.4892	5.73476	10.4687
DAND5	2.4e-05	4.29336	5.00877	4.28896	4.85866
HGSNAT	2.4e-05	5.55028	6.71715	5.68947	6.72462
TNFRSF1A	2.4e-05	6.90188	8.14848	6.78829	8.29554
LASP1	2.4e-05	9.94231	10.8454	9.97224	10.7841
FAF1	2.4e-05	8.99777	9.6769	9.08824	9.67056
RNFT1	2.4e-05	8.09609	7.13152	8.27037	7.1345
KIAA0040	2.4e-05	6.80583	5.0865	6.90171	4.80392
PARP1	2.4e-05	12.4964	11.2118	12.4766	11.1469
RHOH	2.4e-05	8.81593	10.7742	8.94094	10.7317
HDAC1	2.4e-05	10.7434	11.3117	10.7386	11.2115
CTGF	2.4e-05	7.28432	3.53308	7.76552	3.53331
ARHGAP15	2.4e-05	10.0016	11.2215	10.0906	11.2859
LOC100287015	2.4e-05	4.03448	4.75525	4.00433	4.60072
LOC100506972	2.4e-05	5.21339	4.10229	4.98657	4.10373
SH2D4B	2.4e-05	6.29732	3.96484	6.71466	3.97252
S'MARCA2	2.4e-05	9.32533	7.86084	9.49405	8.11419
LZTFL1	2.4e-05	7.19269	9.60204	7.05266	9.61267
PTPN18	2.4e-05	7.66587	6.46566	7.6007	6.58453
LOC100130691	2.4e-05	4.53037	5.04008	4.63835	4.95188
LOC257358	2.4e-05	4.16355	4.78519	4.14157	4.71864
HLADQB1	2.4e-05	8.26226	4.98294	8.7927	4.67907
SLC17A9	2.4e-05	6.55019	4.76395	6.76497	4.4299
ABCC10	3.61e-05	6.68406	7.88492	6.64153	8.0014
TBC1D2B	3.61e-05	8.35147	9.53144	8.46314	9.47771
CDYL	3.61e-05	9.22135	8.16162	9.05934	7.88204
RAD21	3.61e-05	11.327	12.1181	11.3724	12.1135
METTL10	3.61e-05	7.5897	8.99664	8.07016	8.92323
CYSLTR1	3.61e-05	6.49836	4.33732	5.87296	4.12205
PGPEP1	3.61e-05	5.65919	6.52276	5.54301	6.60855
VSIG10	3.61e-05	7.74701	5.38666	7.98008	5.30877
RGL1	3.61e-05	9.86215	7.10682	9.72984	7.23649
PTPN3	3.61e-05	4.92099	6.78294	4.76276	6.91362
ADA	3.61e-05	10.8294	12.6018	10.7304	12.7996
SOX7	3.61e-05	6.62245	4.45345	6.55091	4.37656
MEF2A	3.61e-05	9.11179	7.79812	9.06159	7.83453
CCDC181	3.61e-05	3.82802	4.56045	3.78437	4.48412
CLIP4	3.61e-05	5.18126	7.57729	4.93844	7.62987
SUPT6H	3.61e-05	6.87547	7.35465	6.94195	7.38328
C3orf33	3.61e-05	4.06592	5.23362	3.87703	5.20886
PLCL1	3.61e-05	3.69267	5.45472	3.59226	5.29812
LOC100289187	3.61e-05	5.10215	6.75368	4.96372	6.72098
SLC27A3	3.61e-05	7.41677	4.89514	7.7563	4.90705
GTDC2	3.61e-05	5.794	7.41126	5.70967	7.40277
ASF1A	3.61e-05	9.3181	10.3857	9.60362	10.413
ARHGEF40	3.61e-05	6.55977	5.26258	6.59393	5.1741
ERC1	3.61e-05	6.89434	6.28155	6.79513	6.3217
HCP5	3.61e-05	8.26923	4.4057	8.35808	3.86773
ADPRH	3.61e-05	4.68005	4.15824	4.30934	4.14784
SNX25	3.61e-05	8.03251	6.00628	7.87836	6.01431
INPP4A	3.61e-05	6.02774	7.22958	5.84702	7.28163
P4HA2	3.61e-05	7.07515	3.93859	7.41866	3.96459
SEPW1	3.61e-05	9.14252	10.8271	8.92495	10.612
DHFRL1	3.61e-05	6.08612	7.17028	5.94443	7.18559
PDLIM7	3.61e-05	5.88357	5.0178	5.77381	5.03285
TSPO	3.61e-05	10.1021	6.37576	10.2521	5.24171
CD2	3.61e-05	4.22752	8.42544	4.21442	7.83657
GIMAP1	3.61e-05	4.6415	6.94757	4.40416	7.00693
CHRNA3	3.61e-05	4.29313	6.56451	4.27865	6.71184
RFESD	3.61e-05	6.3549	7.92153	6.34513	7.87697
LILRA2	3.61e-05	5.65922	3.86367	5.50595	3.87516
CPNE2	3.61e-05	10.1145	7.19838	10.2353	7.3758
LOC100507111	3.61e-05	7.34688	8.25076	7.63726	8.34404
LAX1	3.61e-05	5.92358	8.12959	5.67474	8.07054
MIR29C	3.61e-05	4.41648	6.18806	4.53928	5.98132
WNT16	3.61e-05	6.23115	3.94028	4.29412	3.9586
WDR66	3.61e-05	4.67445	4.13119	4.52134	4.12616
GALNT1	3.61e-05	10.3305	8.71126	10.3342	9.46644
NAA30	3.61e-05	8.8869	9.32319	8.90335	9.34021
OSBPL5	3.61e-05	4.77526	6.3148	4.59419	6.37777
CSRP2	3.61e-05	10.3498	5.33316	10.7609	5.32717
MMP11	3.61e-05	5.03678	4.50621	5.00581	4.4764
EVI5	3.61e-05	5.64137	4.42991	5.64504	4.41937
RPS27L	5.37e-05	7.90804	6.80478	7.99527	6.70044
OGN	5.37e-05	4.2709	7.67243	4.31997	7.79467
KANSL3	5.37e-05	7.8042	8.33678	7.93001	8.359
COQ2	5.37e-05	9.33451	7.88546	9.34646	7.90587
AIF1	5.37e-05	5.80234	8.24182	5.2035	8.31798
IGLL3P	5.37e-05	8.15054	4.73752	8.12624	3.88107
LOC100129034	5.37e-05	5.41056	4.76065	5.34115	4.81034
GALNT6	5.37e-05	4.70105	7.58146	4.37957	8.00789
SLC35E1	5.37e-05	7.44648	8.20601	7.46885	8.30096
SUSD4	5.37e-05	4.56484	6.73614	4.39154	6.64408
CSRNP2	5.37e-05	7.1648	8.55439	7.19703	8.51174
SLC35G2	5.37e-05	5.15012	7.7656	4.91204	7.98968
PPFIBP1	5.37e-05	7.12521	4.97916	7.36258	4.68634
SRPK2	5.37e-05	8.41502	9.52115	8.21086	9.57164
PLEKHA8P1	5.37e-05	7.02618	8.02068	6.95195	8.05765
'SEPT6	5.37e-05	10.457	11.4423	10.4827	11.3234
CAPN3	5.37e-05	6.98609	4.4227	6.78132	4.20913
ARFGAP1	5.37e-05	7.03449	7.91997	6.8507	8.02481
LOC100505491	5.37e-05	4.20488	7.48926	3.87245	8.06431
TET1	5.37e-05	5.9076	8.80525	5.60662	8.63016
SPPL3	5.37e-05	8.47052	9.01976	8.54839	8.95922
RFX7	5.37e-05	8.94811	9.51913	8.89756	9.5398
DENND6B	5.37e-05	5.11449	3.98833	5.18955	3.80376
SLC11A2	5.37e-05	7.87006	8.54746	7.99333	8.5985
TSHR	5.37e-05	3.71632	6.79984	3.68784	6.9379
NME3	5.37e-05	7.34102	5.91184	7.40887	5.88638
APBB2	5.37e-05	7.50208	5.05813	7.67795	4.57058
MNAT1	5.37e-05	7.7622	8.98715	7.6394	8.98806
HES4	5.37e-05	4.17399	7.52263	4.16389	7.40096
IRF4	5.37e-05	7.32431	4.61049	7.72169	4.61391
PLS1	5.37e-05	6.51811	9.39691	6.69754	9.31687
TMEM243	5.37e-05	11.3405	10.2058	11.2372	10.391
CRHR1IT1	5.37e-05	4.72181	5.55031	4.67823	5.45175
CYBA	5.37e-05	11.7737	10.6349	11.6597	10.546
GTSF1L	5.37e-05	4.92403	4.2689	4.77254	4.24446
MAGEE1	5.37e-05	5.82927	7.54775	5.51758	7.5564
GPR176	5.37e-05	6.66416	4.62362	7.00451	4.64487
PBLD	5.37e-05	6.22293	5.17465	6.05317	5.24712
C11orf24	5.37e-05	7.24963	6.11995	7.1857	5.87871
FAM76A	5.37e-05	5.3069	5.77761	5.30246	5.71749
KCNJ2	5.37e-05	6.84113	4.19499	6.9857	4.21433
CSNK1A1	5.37e-05	10.1608	10.856	10.2841	10.8453
PDP1	5.37e-05	7.55906	8.92795	7.75238	8.62811
ZBTB21	5.37e-05	8.50903	9.79827	8.4693	9.92228
C10orf10	5.37e-05	6.17151	4.60137	6.4624	4.53093
RNF166	5.37e-05	6.18927	7.1897	6.2112	7.27837
ELL3	5.37e-05	8.36241	6.51296	7.98264	6.34853
PLD3	5.37e-05	6.87577	7.90484	7.02176	7.78833
GPX3	5.37e-05	4.54297	4.09736	4.45416	4.06769
LCT	5.37e-05	4.53711	6.36848	4.58179	6.16391
ZCCHC9	5.37e-05	8.92725	9.66686	8.98249	9.64522
MAN1C1	5.37e-05	6.35691	4.73911	6.60208	4.56196
BLNK	5.37e-05	11.0687	4.51237	12.2919	4.26115
RAB37	5.37e-05	4.58752	7.9819	4.17	8.08846
ITGA8	5.37e-05	6.14407	3.79012	4.14243	3.7851
CCDC93	5.37e-05	7.1386	7.72015	7.23436	7.65182
PHTF1	7.77e-05	8.00819	5.93818	7.95937	5.73541
CD1A	7.77e-05	4.86717	9.08295	4.43769	9.74863
DYRK4	7.77e-05	6.26499	8.19026	6.41721	8.32776
RBCK1	7.77e-05	6.87028	8.19323	6.85221	8.18371
TRAF3IP3	7.77e-05	5.38338	7.28296	5.03328	7.39093
COX11	7.77e-05	9.02384	9.66157	9.09653	9.60499
LOC100130872	7.77e-05	5.95315	6.91011	5.90846	6.85149
HHIP	7.77e-05	4.00966	7.05013	3.85249	7.38807
LAMP5	7.77e-05	7.66238	4.62215	5.59008	4.59319
CD40	7.77e-05	5.83527	4.59978	5.37879	4.60913
C12orf49	7.77e-05	7.93274	7.44203	7.93291	7.51001
GNPDA1	7.77e-05	6.16798	8.99108	6.28581	9.08872
PLD6	7.77e-05	8.19328	6.36106	8.4412	6.66473
RPIA	7.77e-05	10.4482	11.0053	10.4776	11.0687
PTK2	7.77e-05	8.72798	4.89619	8.60395	4.392
MYEF2	7.77e-05	6.52366	9.06894	7.29102	9.12866
ST13	7.77e-05	10.6824	11.3921	10.7568	11.3644
ETS1	7.77e-05	7.13658	8.97457	7.05152	8.94694
SH3RF1	7.77e-05	6.8393	4.87089	6.7627	4.56346
ZHX2	7.77e-05	10.2171	7.99256	10.4436	8.17367
TCF3	7.77e-05	9.06014	8.21858	9.04642	8.28764
INSC	7.77e-05	4.9287	3.95517	4.59245	3.94352
CYBB	7.77e-05	5.52027	4.20493	4.50963	4.2199
SLAIN1	7.77e-05	9.57761	8.05321	9.71825	8.29408
SETD6	7.77e-05	6.72508	4.34136	6.82899	4.32004
MAPK7	7.77e-05	5.92031	6.85076	5.95678	6.71957
LOC91316	7.77e-05	11.9146	8.70463	12.4184	7.7074
ARHGAP17	7.77e-05	10.3506	9.27795	10.4192	9.19231
ZC3H12C	7.77e-05	7.22072	4.02328	7.7475	3.92287
C6orf89	7.77e-05	7.54594	8.25444	7.55377	8.127
CLCC1	7.77e-05	7.41348	6.06322	7.2991	5.87359
EFCAB2	7.77e-05	7.81653	5.83209	7.93901	5.94772
NEDD1	7.77e-05	8.97676	9.80191	8.91316	9.88743
LOC286367	7.77e-05	6.65751	4.31725	7.01265	4.25104
GNB1L	7.77e-05	6.34511	7.15963	6.22172	7.15381
GPD2	7.77e-05	6.48234	4.63882	6.31228	4.61155
CHST11	7.77e-05	8.89473	10.1962	8.74258	10.1665
NEK6	7.77e-05	7.31491	5.03985	7.39097	4.94651
FGF14AS2	7.77e-05	4.24822	5.90504	4.06853	5.74898
ECI1	7.77e-05	9.19464	6.17134	9.12552	5.4154
WDR59	7.77e-05	7.61163	8.23093	7.58463	8.19201
MAPK12	7.77e-05	6.56395	4.29033	6.64297	3.8929
DBP	7.77e-05	6.8405	7.80335	6.86488	7.77921
CCR8	7.77e-05	4.3244	6.41	4.12709	5.40433
DGKA	7.77e-05	7.41248	9.42443	7.3092	9.28619
FAM177A1	7.77e-05	5.92512	6.79958	5.81418	6.67781
ZNF805	7.77e-05	6.30443	7.31457	6.25211	7.4587
DUSP1	7.77e-05	8.30579	5.5156	8.56657	5.6393
CES3	7.77e-05	5.45046	5.97835	5.37335	5.94442
NUDT9P1	7.77e-05	4.08408	5.66665	4.07685	5.74489
TBK1	7.77e-05	8.9303	7.48702	8.99828	8.08869
SYVN1	7.77e-05	7.93719	6.62523	8.01629	6.63679
LIPT1	7.77e-05	9.03217	8.15207	9.16167	8.19328
PSD3	7.77e-05	8.68208	5.15201	9.07721	4.65203
CCDC120	7.77e-05	4.45139	4.90849	4.41519	4.95257
MIER1	7.77e-05	8.99808	9.66233	9.04942	9.67035
ZNF558	7.77e-05	7.02558	8.21109	7.18437	8.30231
TTC39B	7.77e-05	4.22191	4.83992	4.19067	4.5348
GPM6B	7.77e-05	7.34991	4.69959	8.02294	4.67369
KCNMB1	7.77e-05	8.10887	4.64573	8.00298	4.46013
LOC100287598	7.77e-05	4.19996	4.96774	4.23939	4.87217
ZDHHC4	7.77e-05	8.12892	9.42833	8.25445	9.48589
FZD6	7.77e-05	5.17347	8.47679	4.49913	8.65397
LSMEM1	7.77e-05	4.4882	4.85324	4.47157	4.80689
LOC93622	7.77e-05	8.68617	9.70927	8.65375	9.79404
GIMAP7	7.77e-05	4.46904	8.76881	3.75913	9.52264
NIPSNAP3B	7.77e-05	6.57009	4.40187	6.79376	4.25629
KIF13A	7.77e-05	5.31874	4.63717	5.27802	4.52918
EML5	7.77e-05	3.95808	4.49906	3.9909	4.58641
NT5DC2	0.0001114	8.73806	6.38255	8.76264	6.54232
TNS3	0.0001114	7.62427	4.43866	7.60016	4.02942
DDN	0.0001114	6.38626	5.11705	5.862	5.07573
GTDC1	0.0001114	6.9329	6.1524	6.89144	6.26097
TFPT	0.0001114	7.94097	8.75828	7.88524	8.69074
ARMC12	0.0001114	4.74385	6.04581	4.74257	6.08261
LCMT1	0.0001114	8.98937	9.75073	9.06848	9.66876
TMEM134	0.0001114	7.8581	8.68272	7.92333	8.7929
TTC25	0.0001114	3.87905	4.30321	3.876	4.23059
ARL11	0.0001114	5.07468	3.801	4.60076	3.73243
FAM129C	0.0001114	7.93978	4.99831	7.924	4.88692
COA1	0.0001114	9.73676	10.6691	9.75325	10.6722
ADC	0.0001114	5.25366	5.8128	5.27847	5.77359
TMBIM6	0.0001114	11.3869	11.9848	11.3978	12.0352
CEPT1	0.0001114	9.53816	10.4221	9.38436	10.33
GPR132	0.0001114	4.73879	4.13117	4.59033	4.09568
FKBP4	0.0001114	4.77712	5.5732	4.59264	5.53975
LOC283174	0.0001114	3.94884	5.47874	3.91423	5.67479
RIPK4	0.0001114	4.29147	5.0888	4.31469	4.9402
HACE1	0.0001114	7.74207	9.47235	7.65498	9.70111
JUND	0.0001114	6.37868	7.31795	6.42672	7.48081
FAM69C	0.0001114	7.18532	5.42199	5.97587	5.41576
LOC100506342	0.0001114	5.30947	4.58573	5.17956	4.55906
EPSTI1	0.0001114	5.10559	7.95864	4.80871	8.12673
CKLF	0.0001114	10.525	12.0702	11.0099	11.9105
FAM69B	0.0001114	6.85314	5.2013	6.84907	5.31622
BMPR2	0.0001114	7.34324	6.06509	7.45754	6.11247
VAPA	0.0001114	8.0276	8.56919	8.08581	8.46351
LOC100507254	0.0001114	6.49124	4.16925	6.7159	4.13358
CTSS	0.0001114	8.1974	5.6881	8.14801	5.00805
DDX50	0.0001114	10.3907	10.8163	10.4522	10.7149
NTN5	0.0001114	3.82656	4.71459	3.84618	4.56741
KLF9	0.0001114	5.42689	4.21174	5.39374	4.1175
HINT3	0.0001114	6.67293	7.59617	6.9321	7.58212
KANSL1	0.0001114	10.2309	10.7948	10.2393	10.7913
ADK	0.0001114	10.7867	9.94588	10.7635	9.90459
TMEM164	0.0001114	7.48279	8.46366	7.49276	8.58901
RDX	0.0001114	8.67051	7.27135	8.78206	7.83375
KIF3A	0.0001114	6.87037	8.26121	6.74262	8.27241
HDAC5	0.0001114	6.44702	5.73195	6.51528	5.64726
TBC1D15	0.0001114	7.67343	8.12513	7.73215	8.03301
KLHL2	0.0001114	9.02219	7.19279	9.01627	7.49929
ANO6	0.0001114	8.57952	9.37938	8.5139	9.42991
ARSG	0.0001114	4.80104	7.14106	4.69062	7.26132
FAM20C	0.0001114	5.60903	4.15631	5.43073	3.94281
ATG10	0.0001114	7.00747	7.91645	6.94401	7.9052
RBMX2	0.0001114	8.38647	9.14664	8.44553	8.99753
LHFP	0.0001114	6.79527	4.44312	7.02395	4.1238
OXSR1	0.0001114	9.19028	10.1614	9.5556	10.1845
NPY	0.0001114	7.66671	4.03278	8.83292	3.96474
SLC38A6	0.0001114	5.57684	6.89417	5.7471	7.01412
MLLT4	0.0001114	4.9398	4.2343	4.79685	4.20767
SLC35F2	0.0001562	9.45343	7.31306	9.6192	8.475
ANAPC16	0.0001562	9.85157	10.6181	9.81245	10.5489
CD70	0.0001562	7.59218	6.06484	7.40449	5.93285
TMED6	0.0001562	4.92817	4.30959	4.8099	4.28365
MT4	0.0001562	6.8014	5.73184	6.55499	5.75006
PRICKLE1	0.0001562	5.98475	4.88295	5.70307	4.8871
NANOS1	0.0001562	4.19803	6.58214	4.09624	6.56656
LRRC33	0.0001562	6.93824	8.14494	7.01581	8.32589
SWT1	0.0001562	5.84629	6.39274	5.82344	6.36872
MOAP1	0.0001562	9.67296	10.4277	9.68085	10.3868
IMPDH1	0.0001562	9.01922	7.52641	8.96927	7.63795
PAQR3	0.0001562	8.33024	9.69444	8.28722	9.75794
NOP16	0.0001562	10.3984	9.33915	10.3431	9.46875
HDAC4	0.0001562	6.16084	8.38617	6.3009	8.58747
PDIA3	0.0001562	8.53231	7.61285	8.50603	7.59818
CD1D	0.0001562	3.95195	6.95536	3.71518	7.14914
MDM2	0.0001562	7.50193	5.91662	7.67145	5.86075
HIPK1	0.0001562	7.00371	7.81699	6.93401	7.90145
CAMSAP2	0.0001562	7.56325	5.51135	7.86517	5.09335
RNF135	0.0001562	9.62701	7.01039	9.53452	7.28179
IP6K2	0.0001562	8.60498	9.50708	8.69771	9.58324
SMAD7	0.0001562	6.51295	4.50904	6.69832	4.42897
AP1S3	0.0001562	5.50029	4.228	5.6006	4.17668
PROSER2	0.0001562	7.10258	4.6506	7.54159	4.39905
TMEM39A	0.0001562	7.47652	7.86265	7.49642	7.88855
SIPA1	0.0001562	7.93361	6.70241	7.96424	6.61891
KCTD15	0.0001562	7.25358	5.07659	7.65386	4.83997
PLOD1	0.0001562	7.28083	5.95705	7.05888	5.89302
MECP2	0.0001562	6.4293	7.02692	6.45942	6.98205
UBR2	0.0001562	7.5991	8.01922	7.70828	7.97624
TNS1	0.0001562	5.22798	4.34719	5.13836	4.38514
PTPN22	0.0001562	5.39969	7.88037	5.14107	7.70273
LDOC1L	0.0001562	7.76904	10.3707	7.56545	10.3878
EHBP1L1	0.0001562	7.49697	6.61525	7.40169	6.45242
ZCCHC18	0.0001562	6.79832	5.35798	7.04319	5.33887
LOC643783	0.0001562	4.07517	3.51839	3.94945	3.45857
LOC100505760	0.0001562	5.2836	4.04534	5.47207	3.98631
GJA5	0.0001562	4.35668	3.66072	3.95479	3.67305
LCN10	0.0001562	6.31322	4.56785	5.89813	4.52707
MFAP4	0.0001562	4.13713	6.64106	4.1838	6.67831
LRP10	0.0001562	9.08746	7.60012	9.26778	7.31172
CPM	0.0001562	5.84279	4.00657	5.76724	3.99394
B4GALT2	0.0001562	6.67888	5.95959	6.59106	5.93447
FAM126B	0.0001562	7.42156	8.19758	7.47687	8.21158
ZNF512B	0.0001562	6.94424	8.67295	7.56195	8.90793
STX10	0.0001562	8.56669	9.14104	8.51836	9.12115
SLC4A8	0.0001562	4.55314	6.23109	4.35414	6.28018
PGM2L1	0.0001562	6.1594	8.04531	6.26616	8.22356
SLC4A4	0.0001562	4.46579	5.64988	4.48235	5.6845
MACROD2	0.0001562	6.65507	4.24251	6.0525	4.16398
LOC400027	0.0001562	6.98528	7.83112	7.07024	7.87158
TENM1	0.0001562	3.66308	4.47457	3.61471	4.54763
PURB	0.0001562	7.70967	8.62466	7.77311	8.6076
AGPAT1	0.0001562	7.42477	7.9401	7.406	7.9067
ATP8A1	0.0001562	8.00712	6.33718	8.00853	6.52954
FAM102A	0.0001562	6.31863	7.69598	6.22617	7.57699
PITPNM1	0.0001562	5.89017	6.57452	5.88604	6.43889
CCDC69	0.0001562	8.91347	6.46745	9.06664	6.48212
TCL1A	0.0001562	11.1714	4.28629	12.9118	4.25604
IRX5	0.0001562	5.2336	7.73005	5.18021	7.91172
DGKD	0.0001562	9.41539	8.14658	9.3822	8.17497
RBM33	0.0001562	6.54952	7.13221	6.56108	6.96572
ECHS1	0.0002171	11.2617	10.3896	11.3255	10.2792
LRFN2	0.0002171	4.15425	3.64398	4.05861	3.6659
IGSF3	0.0002171	6.07897	5.44965	6.17245	5.43681
MIR503HG	0.0002171	5.18241	5.71141	5.17375	5.77297
CCSER2	0.0002171	7.17647	7.93802	7.26972	7.84051
CPXM1	0.0002171	8.70317	5.92856	9.37397	5.17732
RAPGEF2	0.0002171	8.1279	7.20016	8.26703	7.09564
SPOPL	0.0002171	7.95373	6.14957	7.88869	6.49032
LOC728606	0.0002171	4.34954	7.3592	4.3311	8.01363
CD82	0.0002171	7.18946	9.07494	7.02209	9.32082
ABCD3	0.0002171	9.11469	9.92861	9.10808	9.93927
C1orf54	0.0002171	8.83784	6.26326	8.86298	5.98557
DACT1	0.0002171	6.60605	4.42943	6.6793	4.15645
MARVELD2	0.0002171	4.38994	3.90133	4.2509	3.90473
LOC100507463	0.0002171	9.98902	8.60151	9.95342	8.66492
PCBP3	0.0002171	5.10551	6.6179	4.86522	6.1296
CDK9	0.0002171	7.25959	6.27658	7.48051	6.3438
GANC	0.0002171	6.39826	5.60889	6.5638	5.50896
GLRX	0.0002171	11.269	10.2387	11.294	10.3513
POLI	0.0002171	6.12444	7.01669	6.34917	6.9591
ENO2	0.0002171	6.71495	9.29189	6.94654	9.52248
STIM2	0.0002171	8.65439	7.08535	8.91246	7.19922
FOXO1	0.0002171	8.83691	5.53582	9.3584	5.26945
C11orf49	0.0002171	7.75486	8.85124	8.29569	8.87571
ZNF18	0.0002171	7.84849	8.3739	7.79359	8.36953
RASA1	0.0002171	9.67528	9.05294	9.67007	8.92971
ZEB2	0.0002171	7.40195	3.92212	7.65906	3.80507
KIF21B	0.0002171	7.59235	9.14728	7.38362	9.34426
NLRP3	0.0002171	5.84872	4.23188	6.10835	4.10875
USP46	0.0002171	7.55382	6.11264	7.57589	6.1423
CHCHD6	0.0002171	7.30343	8.38481	7.28142	8.22256
ST6GALNAC6	0.0002171	6.31958	5.75689	6.34439	5.71983
BVES	0.0002171	5.24996	4.36038	5.21274	4.22357
FGFR1OP2	0.0002171	8.07272	8.8759	8.17589	8.96454
PHPT1	0.0002171	10.4761	9.681	10.5403	9.60935
AVEN	0.0002171	8.70676	7.65178	8.66388	7.56788
ERCC4	0.0002171	6.42376	7.0185	6.42538	7.09373
JAM3	0.0002171	4.07215	5.64891	4.02215	5.40732
FAM46B	0.0002171	5.2594	4.77238	5.14087	4.73807
AOAH	0.0002171	4.20636	5.43754	4.20027	4.75302
ITM2A	0.0002171	4.96465	10.8342	4.35765	11.2435
GLDC	0.0002171	8.58237	5.67204	8.62469	5.57547
EOGT	0.0002171	7.11999	5.23796	7.3763	5.28264
TEX19	0.0002171	5.90134	9.03447	5.56052	9.00048
IL27RA	0.0002171	5.10248	6.40788	4.82278	6.51532
SPON2	0.0002171	5.61176	7.13558	5.59695	7.3826
MAPK1IP1L	0.0002171	10.2631	9.86106	10.2627	9.87503
GNA11	0.0002171	6.9741	5.42556	6.95058	5.30021
MFGE8	0.0002171	6.56673	7.71677	6.57606	7.59286
BANK1	0.0002171	6.70724	4.14508	5.71787	4.0621
SPRYD7	0.0002171	6.24363	4.64471	6.14196	4.46229
CD1B	0.0002171	4.26819	8.91495	4.33557	10.3704
PDE4B	0.0002171	6.86321	4.38562	7.04113	4.37569
TRO	0.0002171	4.38365	6.31159	4.10985	6.72167
RAB39B	0.0002171	5.12201	7.17581	5.24839	7.38125
POLG	0.0002171	7.43139	8.35135	7.48867	8.32486
LOC100652791	0.0002171	3.60994	3.99764	3.58534	3.89122
ELMOD3	0.0002171	5.70156	6.24475	5.70977	6.24316
ACAT1	0.0002171	9.70033	9.01055	9.67654	9.0137
DHX35	0.0002171	6.89716	7.47803	6.90814	7.45798
FAM96A	0.0002171	11.8905	11.4906	11.8384	11.5384
RAPH1	0.0002171	4.07054	5.13797	4.02242	4.86357
MPST	0.0002171	8.33764	6.10085	8.28004	5.418
QRSL1	0.0002171	9.08736	7.49824	9.46073	7.37343
ARFGAP3	0.0002171	9.34973	10.1675	9.34769	10.2942
NANS	0.0002171	10.2708	9.51849	10.291	9.66816
TBC1D24	0.0002171	7.69314	6.78035	7.97478	7.00729
UFC1	0.0002171	11.6964	11.2389	11.7281	11.2491
EPHB4	0.0002171	6.33548	5.34873	6.25107	5.32169
COCH	0.0002965	10.02	6.05592	10.6558	4.92342
MT1X	0.0002965	11.0209	7.78899	11.9186	7.53322
KLHL28	0.0002965	7.44939	8.46878	7.37695	8.4619
GGT7	0.0002965	5.14492	5.82758	5.09839	5.7676
RARB	0.0002965	4.95805	4.5617	5.00495	4.58089
C22orf29	0.0002965	7.30751	7.99562	7.37191	7.96143
CAPRIN2	0.0002965	6.71998	7.69815	6.82026	7.77124
OR2F1	0.0002965	4.21524	3.96064	4.19429	3.98581
CHCHD10	0.0002965	9.65873	8.26513	9.51939	8.34348
NEURL1B	0.0002965	10.1104	7.35231	10.4533	7.28613
LLGL2	0.0002965	6.75675	6.02983	6.86612	5.89154
PTPRN2	0.0002965	4.83338	6.36376	4.71342	6.16346
KIAA1551	0.0002965	8.65975	9.72543	8.76137	9.75644
BIRC3	0.0002965	4.30057	7.17542	3.70598	7.47806
PIEZO1	0.0002965	8.51061	9.7794	8.61597	9.79549
MYLIP	0.0002965	7.92352	6.21461	8.23733	6.37137
WDR33	0.0002965	6.81654	7.24966	6.89598	7.23407
CLTCL1	0.0002965	6.18513	4.98388	6.18811	4.91482
GLRX5	0.0002965	12.2745	11.7286	12.1586	11.7052
EGLN1	0.0002965	7.89449	6.28309	8.05216	6.36131
ZXDC	0.0002965	6.83816	7.48553	6.87135	7.56839
HSD17B8	0.0002965	7.89122	8.90706	8.0459	9.00233
RPUSD4	0.0002965	9.77696	9.35068	9.77889	9.49479
MYADM	0.0002965	9.27043	6.96209	9.79757	7.81755
DEF6	0.0002965	8.16993	9.02758	8.23862	9.12733
PSMD10	0.0002965	10.2103	10.6883	10.1049	10.6644
GSN	0.0002965	6.27445	5.04486	6.57902	5.0309
KLHL14	0.0002965	4.90759	4.04164	4.86842	4.03658
APEX1	0.0002965	12.7964	12.102	12.8618	12.2482
ODC1	0.0002965	13.4719	12.3627	13.3409	12.6137
ALG9	0.0002965	8.24613	8.8584	8.18546	8.82228
SPOCK2	0.0002965	5.61755	6.90136	5.53399	6.33175
RNASEL	0.0002965	7.53645	6.56248	7.63303	6.70242
CD9	0.0002965	10.973	5.88055	12.2117	4.79066
SEMA4D	0.0002965	6.60215	8.13496	6.65073	8.29589
CMTM7	0.0002965	10.8137	7.11214	11.5869	6.16702
CLNS1A	0.0002965	11.6259	11.9955	11.5944	11.9074
FRMD4B	0.0002965	8.01589	5.14749	8.3946	4.74262
RHOT1	0.0002965	9.13917	9.72737	9.08943	9.7228
FAM195B	0.0002965	7.26134	7.8997	7.21651	7.70286
NDUFA13	0.0002965	11.867	12.2478	11.8965	12.1902
ADRBK2	0.0002965	7.76502	9.63895	7.87024	9.64871
LAP3	0.0002965	11.3369	10.3759	11.3675	10.5205
CYP2U1	0.0002965	5.55907	7.64967	5.19767	7.81655
MAPKBP1	0.0002965	5.8701	5.38945	5.99533	5.40719
TMEM67	0.0002965	4.31864	4.70249	4.29405	4.71883
FAM98A	0.0002965	10.1505	9.27155	10.1079	9.58473
PIP4K2C	0.0002965	6.08053	7.8276	5.90486	8.01213
LZTS2	0.0002965	7.28879	6.31464	7.49089	6.2282
PCDHGC3	0.0002965	5.03058	4.55066	4.92633	4.59293
MLLT3	0.0002965	4.65888	7.02887	4.38075	7.19273
KLF4	0.0002965	4.51285	4.17248	4.4612	4.1835
DICER1AS1	0.0002965	5.04957	6.28313	5.07359	6.24362
PDE8A	0.0002965	8.54453	7.46805	8.66396	7.57225
TENM4	0.0002965	7.54086	4.28955	7.76599	3.83173
KCNS3	0.0002965	7.65135	5.05336	7.36345	4.82728
PTK2B	0.0002965	7.12472	6.101	6.98314	6.10799
MNF1	0.0002965	9.65364	10.7414	9.9923	10.8372
NHSL1	0.0002965	6.62802	5.73796	6.60196	5.66096
SLC25A4	0.0002965	5.62315	5.0156	5.527	5.04823
TNFAIP8L2	0.0002965	7.24585	5.53304	7.21676	5.4944
LOC113230	0.0002965	4.73616	5.44183	4.73368	5.351
SEMA6C	0.0002965	5.42091	5.00203	5.44677	5.0221
PHLPP1	0.0002965	8.64696	6.9602	8.91223	7.10872
C6orf147	0.0002965	5.0884	6.49816	5.17592	6.60986
TMEM256	0.0002965	10.291	9.4393	10.4009	9.38401
TBC1D10A	0.0002965	6.64379	7.49585	6.62634	7.42523
GRAP2	0.0002965	4.57184	8.07822	4.01173	8.12672
KLHL36	0.0002965	5.95787	5.08414	5.89859	5.07479
LRRC61	0.0002965	5.71239	7.33469	5.26904	7.40426
LRRFIP1	0.0002965	9.66168	9.01479	9.66778	9.15404
IFI30	0.0002965	9.29493	6.89311	9.45236	6.77417
C21orf62	0.0002965	4.48192	4.24251	4.4821	4.25548
NUDT14	0.0002965	6.82088	5.67047	6.91334	5.63089
TSPAN14	0.0002965	8.4512	7.26509	8.72532	7.18405
LOC100506325	0.0002965	6.26347	5.03707	5.90799	4.85593
ATP6V0D1	0.0002965	10.5327	9.54466	10.5377	9.52147
USP11	0.0002965	9.96852	10.9704	10.292	11.0076
LOC100506161	0.0002965	4.9544	5.73264	5.01511	5.72741
GALK2	0.0002965	7.1835	7.75391	7.25058	7.69075
TOP2B	0.0002965	13.0891	12.1405	13.3372	12.2467
PTPN7	0.0002965	7.83998	9.93615	7.76812	9.82353
BNIP2	0.0004006	10.0527	9.46191	10.041	9.61153
PACSIN2	0.0004006	8.81973	8.21954	8.83303	8.2051
DIDO1	0.0004006	7.70728	8.48291	7.65543	8.48918
PUS1	0.0004006	8.5082	7.73149	8.54087	7.75608
RABEP2	0.0004006	7.42172	6.65086	7.55522	6.63073
CRELD2	0.0004006	10.291	9.10413	10.256	9.38876
SMAD1	0.0004006	9.89537	7.42306	9.6545	8.21821
CLEC14A	0.0004006	7.05621	4.19455	7.93189	4.19243
FAM49A	0.0004006	5.50871	3.66194	5.61517	3.67063
C6orf223	0.0004006	5.08748	6.07742	5.06548	6.07157
CDC25B	0.0004006	9.08482	10.2962	9.08677	10.2871
IDH3A	0.0004006	9.3169	10.0197	9.05324	9.92782
ERO1LB	0.0004006	8.33829	6.33209	8.5237	6.39231
SLC15A3	0.0004006	5.88977	4.68697	5.84541	4.7044
BAG3	0.0004006	5.77854	8.67768	4.56813	8.66089
SH3BP5	0.0004006	5.68227	8.86853	4.88079	9.24357
LSMD1	0.0004006	10.4653	9.55462	10.5586	9.42384
CNPY4	0.0004006	7.45671	7.99759	7.50847	8.04414
TCIRG1	0.0004006	8.70611	5.72485	8.9688	5.24018
CLSTN3	0.0004006	5.75127	6.19991	5.72868	6.18365
GPC3	0.0004006	3.91092	4.73604	3.91188	4.41581
BNIP3L	0.0004006	9.94459	11.0149	10.1441	11.1106
CBR1	0.0004006	6.91196	4.59598	7.57692	3.90955
ACO1	0.0004006	7.97767	9.01164	7.9357	8.98965
TMEM54	0.0004006	6.30195	4.37659	6.54484	4.27749
LOC284440	0.0004006	4.94886	5.71812	4.97883	5.63519
NPC1	0.0004006	8.88143	7.99073	8.73833	8.04338
RAB32	0.0004006	5.2294	7.78946	5.3291	7.75786
IFT20	0.0004006	9.29453	9.80238	9.24614	9.86624
PARP15	0.0004006	6.54684	4.50299	6.41406	4.25898
EXT1	0.0004006	5.70636	7.55875	5.05266	7.44674
AMZ2	0.0004006	9.07743	10.2946	9.21672	10.3159
ZCCHC14	0.0004006	6.52753	5.55017	6.56098	5.49367
PRIM2	0.0004006	7.71096	8.17424	7.7361	8.23936
SLC6A20	0.0004006	4.148	4.72684	4.13842	4.6589
KIAA0196	0.0004006	9.18397	8.68311	9.13088	8.73937
FAM43A	0.0004006	7.6379	6.1057	7.64822	5.96257
MAP3K9	0.0004006	5.06658	5.59287	5.03951	5.53637
GOLIM4	0.0004006	6.51387	5.08244	6.67911	5.1324
ZNF264	0.0004006	7.06523	8.32621	7.02193	8.48321
LINC00340	0.0004006	6.54594	9.07792	6.2079	9.24041
LRRN1	0.0004006	3.83426	5.60967	3.85835	6.07651
WNK1	0.0004006	9.49817	10.2724	9.56547	10.2975
NYNRIN	0.0004006	6.57582	5.23787	5.69216	5.19316
SHOC2	0.0004006	10.7403	9.82487	10.9264	9.87179
LRRC37B	0.0004006	7.79445	8.54445	7.86565	8.47402
CD300LF	0.0004006	5.19989	4.42238	4.87003	4.35741
RNF208	0.0004006	5.75359	5.15855	5.43972	5.09362
ADCY6	0.0004006	7.04324	5.42841	7.18262	5.33224
ZNF527	0.0004006	6.79132	7.15146	6.87283	7.11988
FAM212A	0.0004006	6.31692	5.26959	6.47323	5.08275
HYLS1	0.0004006	9.73249	8.1244	9.87714	8.57134
IRF2BPL	0.0004006	9.4786	10.8365	9.19297	10.8226
PARP11	0.0004006	5.61934	6.16266	5.47279	6.08246
LOC100506331	0.0004006	3.66693	3.94562	3.68136	3.90408
GCLM	0.0004006	8.1669	8.85773	8.28526	8.89509
SHCBP1	0.0004006	10.5754	9.95846	10.5375	9.95735
SLC9A7	0.0004006	5.96694	4.95584	5.87216	5.06642
MAPK13	0.0004006	6.72735	5.18963	6.86803	5.14284
LOC100507557	0.0004006	4.66193	5.44234	4.69492	5.43404
XRCC6BP1	0.0004006	8.91494	9.84974	9.11166	9.9332
ANKEF1	0.0004006	3.83803	5.08993	3.78256	5.29425
TRIO	0.0004006	7.0798	5.70876	7.15105	5.2524
POLR1B	0.0004006	9.43345	8.62554	9.42	8.68203
AKR1A1	0.0004006	11.5171	10.8191	11.6076	10.8105
ADORA2A	0.0004006	5.86406	7.58334	5.50786	7.49923
IGFBP6	0.0004006	4.48596	6.18589	4.55989	6.20214
MSX1	0.0004006	7.84881	5.19201	8.14618	4.90314
KIAA0368	0.0004006	9.6805	7.43363	9.6645	8.11094
PYCARD	0.0004006	9.47048	6.83298	10.0376	7.53168
COA5	0.0004006	8.29084	8.89212	8.45304	8.8664
ZNF70	0.0004006	6.17052	5.65742	6.1357	5.6338
LARP1B	0.0004006	7.22938	7.75703	7.26534	7.80912
MARVELD1	0.0004006	8.38207	6.68847	8.525	6.47303
SORBS1	0.0004006	5.91803	4.01504	5.73353	3.99866
RTCA	0.0004006	9.61517	9.87959	9.63393	9.80938
ZBTB47	0.0004006	5.33028	4.93821	5.39139	4.93491
SPTSSA	0.0004006	8.61393	7.8438	8.61837	7.8742
LOC642852	0.0004006	5.4607	6.43686	5.39614	6.46802
KANSL1L	0.0004006	5.56328	4.55576	5.99035	4.36816
PTPN12	0.0004006	8.1631	6.5499	8.23569	6.62028
FAM45B	0.0004006	6.92564	7.69266	7.00119	7.57495
RUNX3	0.0004006	4.87386	7.28439	4.2721	7.34864
SFI1	0.0004006	6.21749	7.14905	6.2437	7.24337
ATP10D	0.0004006	8.77381	6.51903	8.8191	6.33785
TMED10	0.0004006	11.1667	11.7543	11.1738	11.8217
MAPRE1	0.0004006	11.1988	11.6334	11.1318	11.5996
DIXDC1	0.0004006	5.61789	5.99709	5.59656	5.89157
PRR14	0.0004006	7.4173	8.3935	7.43306	8.39429
RHOG	0.0004006	8.99042	10.0103	9.00221	10.0148
GEN1	0.0004006	8.76225	8.03239	8.78984	8.05839
FDFT1	0.0004006	12.1086	12.8756	12.0588	12.9277
ICOSLG	0.0004006	5.27858	4.74884	5.33284	4.79122
IGSF8	0.0005344	5.06614	5.67443	5.15307	5.74873
ZNF280B	0.0005344	6.31846	7.45496	6.15926	7.58166
PITX1	0.0005344	4.35926	5.28227	4.27154	5.20913
PAFAH2	0.0005344	5.97973	7.3648	5.94915	7.12866
NCOR2	0.0005344	4.98964	5.2796	4.98369	5.22682
IRF7	0.0005344	8.15044	6.69691	8.10746	6.78005
KLC4	0.0005344	4.83745	5.34223	4.83266	5.50055
PAQR7	0.0005344	5.12901	4.6972	5.15106	4.6881
DDIT4L	0.0005344	6.12958	4.24487	5.41428	4.06271
UBR4	0.0005344	9.94799	10.5004	9.99732	10.5742
FAM107B	0.0005344	10.9386	8.43773	11.3162	8.55775
CARD11	0.0005344	5.68935	6.74148	5.63838	6.61886
RILPL1	0.0005344	4.43579	5.57399	4.31517	5.33001
SPAG6	0.0005344	5.37712	3.82526	3.98072	3.76565
EIF1AD	0.0005344	8.24913	8.72988	8.21748	8.72086
LITAF	0.0005344	8.46875	6.20009	8.29032	6.41218
LARGE	0.0005344	6.72802	5.02002	6.79478	5.10213
CD247	0.0005344	5.94922	9.22769	5.29347	9.50313
GALNT7	0.0005344	10.782	10.1487	10.8198	10.1951
LRRC8C	0.0005344	9.10899	7.44522	9.5346	7.55963
SCAPER	0.0005344	6.74915	7.74327	6.73509	7.84413
MAPKAPK5AS1	0.0005344	8.12872	8.60498	8.06429	8.58347
DHPS	0.0005344	9.58975	10.2344	9.52183	10.3854
PAPOLA	0.0005344	11.1382	10.6735	11.1318	10.7699
SEC31B	0.0005344	6.38502	7.64	6.40048	7.65425
EGFL7	0.0005344	6.23039	4.5352	6.40699	4.5123
ELOVL1	0.0005344	8.94874	8.16566	8.90169	8.18216
LOC92249	0.0005344	5.66155	6.48387	5.62484	6.38924
THAP5	0.0005344	7.4937	8.2838	7.43115	8.4304
TMC8	0.0005344	6.40858	8.48847	5.81996	8.53224
FBXO42	0.0005344	8.03612	8.57455	8.05045	8.72344
C12orf5	0.0005344	9.40514	8.04893	9.39765	8.40861
KIAA0319L	0.0005344	7.11089	7.65919	7.1083	7.69462
LAPTM4A	0.0005344	11.3147	10.7744	11.1839	10.6872
TRAF3IP2AS1	0.0005344	4.8856	5.72614	4.87079	5.74524
NRDE2	0.0005344	5.8488	6.36657	5.78602	6.44394
ZNF165	0.0005344	6.13677	4.47043	6.15458	4.33218
ZNF862	0.0005344	6.63245	7.38624	6.44257	7.36107
ABHD17C	0.0005344	8.12148	6.28391	8.09834	6.16826
MAST3	0.0005344	7.62669	6.76301	7.57352	6.7573
ZBTB7B	0.0005344	4.86196	4.53423	4.81654	4.4798
FKBP14	0.0005344	5.47175	7.29392	6.00782	7.34601
PODXL	0.0005344	8.36016	6.26448	8.68886	6.1299
NDST3	0.0005344	3.65101	5.98004	3.64742	6.09561
ASAP2	0.0005344	9.08868	6.22914	9.42147	4.84807
SYNJ1	0.0005344	5.65491	6.4841	5.6816	6.43441
PSAP	0.0005344	10.3156	11.7381	10.1436	11.7408
ABHD15	0.0005344	7.9895	6.50083	8.05316	6.33088
NFATC3	0.0005344	8.85852	9.77126	9.07018	9.83743
TFB2M	0.0005344	10.6109	9.71931	10.7197	9.656
AGGF1	0.0005344	9.17466	9.6694	9.27915	9.64022
RHBDD1	0.0005344	6.90745	7.77222	7.06679	7.69595
SLC30A5	0.0005344	8.30039	8.54564	8.27122	8.5909
CLIP2	0.0005344	7.29734	5.67382	7.50859	5.76229
P2RX5	0.0005344	7.91463	10.1339	7.57987	10.5041
IRF8	0.0005344	8.44446	6.34206	8.52915	6.48538
ATAD1	0.0005344	10.2414	10.8059	10.2193	10.76
CETP	0.0005344	4.72337	4.00808	4.44897	4.05523
CD79A	0.0005344	9.96556	6.84464	10.0235	6.3747
SLC30A7	0.0005344	7.7022	8.35624	7.68798	8.42409
BBS5	0.0005344	4.05042	4.56435	3.95703	4.61323
PCNXL2	0.0005344	5.31663	6.52596	5.27803	6.77063
PLK1S1	0.0005344	8.05284	9.16705	7.99678	9.3963
LMBR1	0.0005344	6.31436	7.08487	6.30171	7.06718
KCTD1	0.0005344	5.98928	6.86646	5.85161	6.8184
FAM160B1	0.0005344	7.00006	7.51108	6.99871	7.51829
SLC22A16	0.0005344	7.84179	5.31393	7.99326	4.91843
LPGAT1	0.0005344	9.07644	7.67936	9.0923	7.93312
IDI1	0.0005344	12.0163	11.3248	11.9502	11.428
HES1	0.0005344	3.88879	8.1464	3.58915	8.97323
KDM1B	0.0005344	7.18267	5.95148	6.91845	5.96231
DCLRE1A	0.0005344	6.7259	7.85112	6.49642	7.83595
PINX1	0.0005344	7.50874	6.56225	7.48751	6.39994
ZNF711	0.0005344	5.68575	8.48294	3.96556	8.69204
BAIAP2AS1	0.0005344	5.44248	6.2979	5.28464	6.23483
VPS18	0.0005344	6.54904	5.9442	6.56625	5.843
YPEL3	0.0005344	8.20715	6.2731	8.29551	5.7968
HHIPAS1	0.0005344	5.69646	9.09744	4.92568	9.25508
SMG9	0.0005344	6.96857	7.53161	6.98191	7.46961
BEX5	0.0005344	4.6859	6.40882	4.71643	5.05048
CXXC1P1	0.0005344	4.16339	4.48678	4.14075	4.44935
ZSCAN30	0.0005344	6.72253	7.3863	6.83165	7.38118
FAN1	0.0005344	7.69553	8.34002	7.62858	8.30105
CD180	0.0005344	4.84419	3.95686	4.80783	3.96461
LY6G5C	0.0005344	4.5103	5.49137	4.51091	5.51189
TTC21A	0.0005344	5.3647	4.92955	5.26802	4.90725
NRM	0.0005344	10.4805	9.54702	10.5397	9.66244
ASB3	0.0005344	9.69479	10.1934	9.71376	10.3492
LETM1	0.0005344	6.86976	7.39806	6.87734	7.33999
ALDH3A2	0.0005344	7.63503	5.88136	7.68664	5.37775
CALD1	0.0005344	6.60627	4.12286	6.39918	4.1528
PDIK1L	0.0005344	8.21292	8.8224	8.37286	8.88609
ETV7	0.0005344	4.56525	4.15139	4.53995	4.18741
MYO1G	0.0005344	6.58426	9.05101	6.82984	9.38788
LIG3	0.0005344	6.76207	7.31249	6.81178	7.25756
ZHX3	0.0005344	5.39018	5.93914	5.34568	5.99517
CHRNA9	0.0005344	4.43861	6.69246	4.21147	6.74105
KATNA1	0.0005344	9.21244	9.75769	9.36315	9.81338
WWP2	0.0005344	6.71816	6.14524	6.78362	6.15696
PMM1	0.0005344	6.00725	7.10892	5.98101	7.21262
PEBP1	0.0005344	11.2177	9.80763	11.2889	10.2579
IFNAR2	0.0005344	8.96171	9.97068	8.73554	9.80224
CAMLG	0.0005344	10.5491	11.1122	10.5333	11.1237
HLAF	0.0005344	10.8307	9.25875	10.6352	8.9538
GPR174	0.0005344	4.60001	7.05608	4.48737	6.81172
BSDC1	0.0007067	7.85743	8.48751	7.71248	8.49013
CBFA2T2	0.0007067	5.92536	6.64998	5.86941	6.52345
TNFSF4	0.0007067	7.79035	5.457	7.70998	5.2016
TBRG1	0.0007067	6.75152	7.40905	6.79926	7.42572
STAT6	0.0007067	8.3976	7.77123	8.34634	7.80685
CCDC171	0.0007067	4.33512	5.4686	4.37026	5.38172
GNG11	0.0007067	8.14305	5.21341	8.27353	5.17749
ZDHHC20	0.0007067	9.19323	9.85192	9.26001	9.9114
BIRC2	0.0007067	9.85538	10.4742	9.85404	10.5279
INSIG1	0.0007067	10.2764	11.3674	10.1425	11.4123
ESAM	0.0007067	5.46465	4.24025	5.18613	4.23372
OBFC1	0.0007067	6.28448	6.8907	6.27309	6.81087
USP30	0.0007067	7.40862	8.03295	7.27026	8.0913
TSPAN5	0.0007067	5.10864	7.96234	4.79696	8.42323
CLEC4A	0.0007067	4.3879	5.70044	4.3676	4.99774
PGM2	0.0007067	9.85793	9.13711	9.8424	9.09453
GRINA	0.0007067	6.70746	5.82223	6.91775	6.06107
SCFD2	0.0007067	8.89047	8.15467	8.90224	8.14582
DERA	0.0007067	10.733	9.91024	10.8505	9.87566
RASSF2	0.0007067	9.91112	7.50863	10.0229	8.58758
CPVL	0.0007067	4.62562	8.05673	4.41028	9.06072
GK5	0.0007067	4.86343	5.69545	4.72816	5.71218
CD28	0.0007067	4.21783	7.47074	4.21283	7.66038
OXLD1	0.0007067	7.86193	8.2996	7.93108	8.30857
VPS45	0.0007067	8.73742	9.41954	8.69277	9.18703
PDCL	0.0007067	8.45697	7.93944	8.4872	7.90194
RAD54L	0.0007067	9.12015	9.89035	9.18881	9.97204
FAM73A	0.0007067	5.8607	6.87092	5.55649	7.15621
CELSR3	0.0007067	5.92003	6.87254	5.90223	6.80753
USP43	0.0007067	6.29491	4.87713	6.45851	4.8482
EIF5A2	0.0007067	4.68941	6.31	4.6326	6.66251
NSMF	0.0007067	6.38606	5.26114	6.32815	5.20885
SVOPL	0.0007067	3.99718	5.9797	3.90582	5.58104
RGS10	0.0007067	9.54231	11.2985	9.77897	11.4525
CRY1	0.0007067	10.1495	10.8499	10.1173	10.9153
PIGV	0.0007067	7.44697	8.29779	7.2487	8.40305
RABEPK	0.0007067	9.56585	8.92791	9.58501	8.892
MS4A7	0.0007067	4.63017	3.68521	4.29983	3.68931
PLCXD1	0.0007067	7.66794	8.37662	7.69039	8.56983
MRPS2	0.0007067	9.3278	8.77928	9.26078	8.79308
EFNA4	0.0007067	8.2092	6.98637	8.41418	7.11755
ZNF771	0.0007067	6.57738	5.74547	6.7327	5.70953
MS4A1	0.0007067	7.13941	4.31448	5.81333	4.25065
CCNI	0.0007067	12.2362	12.7056	12.2883	12.6344
EIF4G3	0.0007067	7.23331	6.67422	7.19964	6.68164
IDE	0.0007067	9.13539	8.39282	9.2039	8.28837
SOBP	0.0007067	4.69723	5.5997	4.39629	5.5425
SLC45A4	0.0007067	6.05253	6.75025	6.03714	6.6687
PPP2CA	0.0007067	11.3696	11.7177	11.3866	11.6601
ZNF593	0.0007067	9.53683	8.48654	9.56922	8.60726
MAP7D1	0.0007067	8.31171	8.74212	8.32898	8.75628
GRK5	0.0007067	6.0574	7.56647	5.83454	7.45432
SLC25A13	0.0007067	7.50825	5.45981	7.90267	5.1523
FMO5	0.0007067	4.75015	4.30412	4.85078	4.27015
CNEP1R1	0.0007067	9.34237	9.80214	9.33452	9.77108
BOLA1	0.0007067	7.30493	8.10505	7.25599	8.19713
XKR4	0.0007067	5.46637	3.5482	5.37461	3.5448
ALG6	0.0007067	9.02919	9.68428	8.99865	9.65245
S100PBP	0.0007067	9.02908	9.63847	9.03525	9.59027
LGR5	0.0007067	6.09552	4.44602	5.22536	4.36709
LINC00526	0.0007067	5.98527	7.47644	6.37016	7.55702
NIPAL2	0.0007067	5.74195	5.22716	5.7172	5.12707
CHMP1B	0.0007067	8.12013	8.7078	8.30287	8.76055
ABCB4	0.0007067	6.63069	4.60974	7.10821	4.44208
MRPL36	0.0007067	11.6536	11.2385	11.705	11.2213
HKR1	0.0007067	7.29303	7.95317	7.22158	7.9448
ANXA2	0.0007067	11.1384	8.52548	10.9659	8.47876
FGD2	0.0007067	5.98646	5.15328	5.88641	5.11389
TMEM194B	0.0007067	5.32086	6.06487	5.42491	6.04121
SOX4	0.0007067	10.6175	11.5127	11.019	11.559
STAM	0.0007067	8.83754	9.78445	8.72712	9.71102
NAGA	0.0007067	7.86908	7.11692	7.87388	7.23897
GDAP2	0.0007067	6.39943	6.90329	6.44605	6.92479
SNHG11	0.0007067	6.46234	7.57718	6.57815	7.70837
SRSF8	0.0007067	8.35994	7.53261	8.24011	7.8144
USP20	0.0007067	6.36301	8.02082	6.24431	7.47191
CAP2	0.0007067	7.17061	4.69427	7.54438	4.55867
ZNF449	0.0007067	6.04262	6.4493	6.04516	6.38738
TNFRSF13C	0.0007067	6.07469	5.46943	6.00256	5.42753
RGMA	0.0007067	6.6808	5.08084	6.32532	4.79057
ZMYM1	0.0007067	7.01148	7.94594	6.98032	7.89091
SAV1	0.0007067	8.35083	7.12523	8.41426	7.22523
SLC19A2	0.0007067	6.11051	7.83283	6.1905	7.84202
MOCS1	0.0007067	3.94673	4.74326	3.91935	4.62747
ADI1	0.0007067	10.7628	9.40169	10.7782	9.35581
ARHGAP42	0.0007067	5.75887	4.57756	5.85489	4.55376
GLIS3	0.0007067	4.29893	3.8622	4.07572	3.83796
PIGX	0.0007067	8.98702	9.60645	8.92107	9.59482
TLR4	0.0007067	4.33887	3.81616	4.03289	3.79632
NT5DC3	0.0007067	6.40942	5.71105	6.39461	5.73189
PHF7	0.0007067	5.03725	5.58025	5.05205	5.38833
SAMHD1	0.0007067	6.35469	4.39488	5.35062	4.20825
STX7	0.0007067	8.73838	7.22907	9.06971	7.63633
LIN28B	0.0007067	4.71477	8.45402	4.0994	9.55507
NAV1	0.0007067	8.03706	5.47382	8.64608	5.06762
AKAP12	0.0007067	8.91895	5.14057	10.1331	4.75463
TCAIM	0.0007067	6.9479	7.51262	6.92446	7.54611
CLEC2D	0.0007067	8.04139	5.1042	8.6961	4.94742
PKDCC	0.0007067	6.31994	4.56402	6.25098	4.57462
SCARF1	0.0007067	5.71704	4.37349	5.70045	4.19872
CACYBP	0.0007067	10.6426	10.1722	10.6842	10.2913
COLGALT1	0.0009238	7.0088	6.50515	7.00952	6.5388
ELOVL5	0.0009238	11.2686	11.8996	11.1605	11.9573
CKAP4	0.0009238	8.92096	7.00406	8.68886	7.38487
INSIG2	0.0009238	8.16713	9.02745	8.10946	8.94219
PLEKHH1	0.0009238	4.2422	5.0439	4.34133	4.86457
CDADC1	0.0009238	6.98952	7.74629	6.98889	7.57162
LOC728431	0.0009238	4.23311	5.1684	4.1434	4.89322
RPS6KA1	0.0009238	7.95736	7.26082	8.00594	7.36397
FAM46C	0.0009238	5.09881	6.9844	5.09221	6.79874
AFG3L2	0.0009238	10.0078	9.54134	9.97199	9.59547
TADA3	0.0009238	5.14735	5.63636	5.01593	5.64657
RAP1GDS1	0.0009238	9.57584	10.5011	9.60246	10.6623
DOCK2	0.0009238	10.026	11.0051	10.4067	11.0553
MSN	0.0009238	11.1466	11.8747	11.2198	12.0404
TTC33	0.0009238	7.75371	8.46705	7.87107	8.57943
NLRC5	0.0009238	8.79186	6.85565	8.98352	7.12238
CEBPB	0.0009238	8.77212	10.4533	9.09742	10.8458
ITGA9	0.0009238	4.22068	3.91235	4.1068	3.87561
SERINC1	0.0009238	9.37665	10.0859	9.3513	10.1918
CUL1	0.0009238	10.0128	9.10405	10.0113	9.10657
MTMR14	0.0009238	8.81967	8.14879	8.9738	8.13176
CAMK2G	0.0009238	7.71171	8.26562	7.72116	8.24329
SREK1IP1	0.0009238	8.12617	8.78634	8.15475	8.79556
C3orf35	0.0009238	3.88373	4.4437	3.87862	4.38571
TEC	0.0009238	5.96153	4.69742	6.23475	4.49974
CROCC	0.0009238	4.62057	5.22072	4.45568	5.17541
LOC100506459	0.0009238	5.97586	4.68385	5.50209	4.68833
TECPR1	0.0009238	5.81616	6.38673	5.77296	6.52308
TRUB2	0.0009238	8.8969	8.16957	8.93084	8.16689
SSFA2	0.0009238	6.95585	7.67754	7.25891	7.87904
LOC100505549	0.0009238	6.9742	5.68036	6.95352	5.70422
MORC3	0.0009238	7.77216	8.49577	7.7754	8.39881
KIAA1919	0.0009238	5.66011	6.24583	5.70816	6.35264
CTAG2	0.0009238	3.70748	3.56408	3.69998	3.59182
USP34	0.0009238	9.00465	8.46477	9.1428	8.38429
STK38	0.0009238	10.0114	8.90743	10.1758	8.85552
JDP2	0.0009238	5.11526	4.5122	5.13365	4.45418
EML6	0.0009238	4.94058	6.41379	4.48703	6.45544
AOX1	0.0009238	5.26071	4.22411	4.5463	4.15022
ROGDI	0.0009238	7.10636	5.87264	7.19597	5.53879
PHF12	0.0009238	6.06614	6.49262	6.16626	6.56548
CCM2	0.0009238	8.61543	9.43662	8.55728	9.38151
BLK	0.0009238	8.64232	5.07516	8.1419	3.95493
PSD4	0.0009238	5.58847	7.01328	5.64061	7.20662
BAP1	0.0009238	7.76935	8.4395	7.80677	8.4794
CHI3L2	0.0009238	7.07139	11.2909	7.15394	11.6875
RASSF10	0.0009238	5.74802	3.82454	5.12645	3.84106
TASP1	0.0009238	7.33613	8.44233	7.31679	8.41669
GPA33	0.0009238	4.73035	6.28208	4.76042	5.68353
RAB17	0.0009238	5.97329	5.10126	5.63482	5.1533
MGAT5B	0.0009238	4.60555	4.329	4.58036	4.29894
PIP4K2A	0.0009238	7.94914	9.29415	8.14633	9.40437
BCL11A	0.0009238	10.369	8.65178	10.6288	9.39108
SIKE1	0.0009238	7.39787	8.32126	7.60232	8.29271
BOLL	0.0009238	4.2668	4.66788	4.23847	4.66349
NT5M	0.0009238	5.55475	6.53924	5.6569	6.42713
PIGK	0.0009238	7.89134	8.38609	7.8772	8.31395
KBTBD2	0.0009238	8.30756	9.04697	8.542	9.00587
RALGAPB	0.0009238	7.8257	8.20325	7.84715	8.28745
C14orf132	0.0009238	7.96802	5.90111	8.48447	5.61286
RABGAP1L	0.0009238	10.5403	9.00514	10.703	9.06073
PAN3	0.0009238	11.755	10.6321	11.7515	10.6199
FAM111B	0.0009238	7.98226	6.39736	8.1046	7.11563
MDK	0.0009238	8.7934	5.96639	9.12578	5.95129
WDR91	0.0009238	5.9459	5.44353	5.91436	5.53955
STAMBPL1	0.0009238	7.73865	9.55487	7.99373	9.94164
FOPNL	0.0009238	9.46613	9.87893	9.37808	9.89115
VAPB	0.0009238	7.20941	7.73826	7.2438	7.70968
PLD4	0.0009238	6.24261	4.159	6.10994	4.16316
THYN1	0.0009238	9.66384	10.3003	9.47553	10.366
LRRC47	0.0009238	10.3587	10.8871	10.3	10.928
MAP2K5	0.0009238	7.58405	8.34773	7.75377	8.41377
GEMIN7	0.0009238	7.87467	7.36959	7.86905	7.52465
CLPX	0.0009238	10.2872	9.79652	10.2779	9.84553
WWOX	0.0009238	6.82638	7.36732	6.86388	7.37766
C12orf73	0.0009238	7.968	8.51368	7.92729	8.47455
ICAM3	0.0009238	7.72426	10.7133	7.62701	10.9237
NMBR	0.0009238	4.03084	4.27564	4.05236	4.30184
ANXA2P2	0.0009238	6.63042	5.58142	6.69739	5.53771
ZSWIM6	0.0009238	9.35683	7.5596	9.63832	7.82058
CROCCP3	0.0009238	4.66847	5.00536	4.62552	4.98858
PIGA	0.0009238	6.79534	7.44788	6.74208	7.436
FAM160A2	0.0009238	6.70115	7.14786	6.80722	7.13778
MPEG1	0.0009238	4.87222	3.85574	4.17816	3.85752
AMDHD1	0.0009238	4.06873	5.05115	3.75901	5.03408
IGFBP2	0.0009238	7.28073	10.8365	7.73979	11.0543
TM2D3	0.0009238	9.41262	10.0611	9.36508	10.008
FHL2	0.0009238	4.63471	6.80789	4.35482	6.81648
UBE2D3	0.0009238	11.7465	12.0311	11.7807	12.0257
ZNF211	0.0009238	7.85198	8.41737	7.99849	8.47885
MYH9	0.0009238	8.9873	8.38188	9.01119	8.43906
TMEM237	0.0009238	7.20522	8.16224	7.39223	8.04612
HOXB3	0.0009238	6.05992	7.12771	5.98247	7.1242
SYT1	0.0009238	7.64417	4.14732	8.55175	3.93708
MAP2K2	0.0009238	7.96994	8.49118	7.9997	8.43996
HK1	0.0009238	8.4984	9.93981	8.87358	9.81736
SYTL2	0.0009238	5.17802	4.75401	5.0661	4.79192
UEVLD	0.001199	7.4448	5.68679	7.85979	5.11453
RNPEP	0.001199	10.0323	8.59864	10.0228	8.85076
SMYD4	0.001199	7.70639	8.19713	7.68679	8.14511
LOC100128822	0.001199	9.14412	9.86969	9.18376	9.73213
DSCR3	0.001199	7.71599	8.2713	7.61716	8.24422
PHF15	0.001199	7.24484	8.06856	7.4295	8.04537
MBTPS1	0.001199	7.62838	8.28224	7.67133	8.34369
SSB	0.001199	11.2945	10.7014	11.3618	10.7794
CHRNA1	0.001199	4.18137	3.60233	3.91951	3.63605
DAGLB	0.001199	8.19172	6.79266	8.29187	6.88494
GOPC	0.001199	8.07774	8.61935	8.14961	8.75393
GNRH1	0.001199	5.09593	6.34804	5.10995	5.90027
PTGDR2	0.001199	4.08882	4.87182	4.08744	4.56038
BCAR3	0.001199	7.13595	5.45359	6.46667	5.43799
C1orf52	0.001199	7.64216	8.09297	7.62265	8.02258
COL7A1	0.001199	5.47171	5.20171	5.41472	5.26567
KIF1C	0.001199	6.75906	6.08341	6.71788	6.20536
CXCL3	0.001199	4.18265	4.82017	4.15893	4.49864
S100A16	0.001199	7.96998	6.31917	7.08901	6.34278
SSU72	0.001199	9.66844	10.0324	9.64304	9.89656
SPA17	0.001199	7.72766	5.72597	7.9436	5.00946
ZNF570	0.001199	5.28301	5.92075	5.37432	5.96838
ATP5G2	0.001199	13.1454	12.7274	13.2319	12.7271
LRRC4	0.001199	5.65627	4.75355	5.16258	4.7609
SNTG2	0.001199	3.89009	4.87613	3.89209	4.52052
MAP3K12	0.001199	5.96944	6.30354	5.942	6.2672
NCSTN	0.001199	8.46226	8.10559	8.41278	8.21826
EXD2	0.001199	6.08074	6.81288	5.9186	6.82798
FTSJD2	0.001199	8.51743	8.96176	8.50096	9.03976
MIER2	0.001199	5.82897	6.40484	5.67261	6.39643
DUSP15	0.001199	4.57855	4.16095	4.44927	4.06485
FAM120B	0.001199	7.04796	7.50201	7.12424	7.51716
AGRP	0.001199	4.7314	4.37599	4.67688	4.36915
KCNQ5	0.001199	6.25362	4.53513	6.51632	4.00351
MGARP	0.001199	4.70851	5.23303	4.71459	5.29523
CAPN1	0.001199	7.85525	7.26755	7.73414	7.16819
FAM195A	0.001199	8.68193	7.08604	8.58303	6.83568
TIMM8A	0.001199	7.85036	7.00337	7.73964	7.11003
DENND1C	0.001199	6.19598	7.9497	6.34354	8.21245
FGFR3	0.001199	4.56229	5.08501	4.60451	4.88087
RAB3D	0.001199	5.2751	6.0757	5.26185	5.96673
HSF2	0.001199	8.00847	8.95184	7.99467	9.06021
BUD13	0.001199	8.51137	8.98043	8.50518	9.07822
WHSC1L1	0.001199	7.60456	8.16216	7.52564	8.27112
KHDC1	0.001199	5.36882	6.36682	5.1894	6.3936
CENPO	0.001199	6.63134	7.12917	6.67489	7.08285
ACVR2B	0.001199	6.67819	7.75524	6.69364	7.692
BCS1L	0.001199	9.02758	8.46215	9.06781	8.37984
CREB5	0.001199	5.62282	4.21945	4.68023	4.19908
RERE	0.001199	5.56699	5.06419	5.62175	5.04021
DENND1B	0.001199	5.92769	7.26735	6.08865	7.02508
ACADSB	0.001199	7.24495	6.7785	7.21149	6.78806
CLTC	0.001199	12.9402	12.4646	13.0497	12.4299
PRR11	0.001199	9.69948	10.2401	9.6802	10.2765
ZXDB	0.001199	5.00263	5.54543	5.10385	5.4332
MIR600HG	0.001199	6.80737	5.89952	6.80056	5.86506
C4orf32	0.001199	9.74095	7.01825	10.4392	7.11238
TMEM136	0.001199	6.31574	5.05928	6.74802	4.83175
NFYB	0.001199	8.38407	8.83386	8.3829	8.9091
MYL6	0.001199	13.2558	12.7444	13.3421	12.8297
HSD17B6	0.001199	6.26811	7.56426	6.37634	7.57299
C1orf112	0.001199	8.04401	8.82263	8.02915	8.85127
MFSD1	0.001199	10.152	9.09705	10.306	8.91858
TAS2R5	0.001199	4.28865	4.93829	4.18746	5.00809
SLC25A38	0.001199	8.86336	9.41305	9.00789	9.36559
ACTL9	0.001199	3.81631	3.66136	3.85058	3.67239
OSBPL2	0.001199	7.41718	8.04089	7.28367	8.06852
C4orf29	0.001199	7.79929	8.59779	7.76255	8.52655
TTC39C	0.001199	8.22134	6.90091	8.06218	6.75274
JMJD1C	0.001199	8.80679	7.98254	8.66441	7.93418
FBLN2	0.001199	3.95209	5.24751	3.9506	4.84035
LOC338799	0.001199	7.11754	7.92147	7.19376	7.98274
CEP104	0.001199	7.34083	7.86932	7.35743	7.7408
CNOT6L	0.001199	6.91237	8.09345	6.82843	8.19466
THBS4	0.001199	5.47027	4.13108	5.33707	4.12391
RAB34	0.001199	8.64699	5.31344	9.25487	4.45943
'MARCH9	0.001199	6.00825	7.10552	6.11739	7.21638
LOC440288	0.001199	7.60299	8.1036	7.60039	8.06702
PMPCA	0.001199	9.43632	8.88062	9.42615	8.85362
LOC100272217	0.001199	3.81004	4.13031	3.76681	4.13716
DCLRE1C	0.001199	9.68754	8.94015	9.90101	8.87431
NAPEPLD	0.001199	5.20981	6.55082	5.24205	6.56677
SLC12A9	0.001199	5.22114	4.71975	5.08206	4.70328
CEP63	0.001199	8.23202	8.82245	8.19584	8.67188
SHQ1	0.001199	9.75483	10.8688	9.77361	10.7751
KCNK12	0.001199	7.53523	4.3272	7.30671	4.22821
SIVA1	0.001199	10.0131	10.8113	10.0313	11.107
TMEM71	0.001199	5.64899	8.19669	4.72853	8.24923
CXCR7	0.001199	4.51396	6.098	4.07537	6.34688
CD53	0.001199	12.4761	11.1842	12.4672	11.4436
ST6GALNAC4	0.001199	7.72404	6.2096	7.75678	6.05643
MIR3682	0.001199	7.7551	6.7343	7.95447	7.06653
RBMS1	0.001199	7.91146	9.49034	8.37505	9.46221
LOC100505878	0.001199	3.51792	3.85297	3.52651	3.77646
SCRIB	0.001199	9.4368	8.82329	9.24421	8.8632
LOC100287616	0.001199	3.66339	5.92205	3.60682	6.40278
SNX27	0.00154	7.33676	7.75689	7.22366	7.76773
SCN3A	0.00154	3.90001	7.32484	3.78162	8.08983
TSLP	0.00154	3.92243	5.8329	3.88784	5.74694
ABCB9	0.00154	4.99456	4.75924	4.98422	4.7759
PBX3	0.00154	9.41022	8.19413	9.00833	8.37493
LEMD2	0.00154	6.35747	7.04242	6.3359	7.0104
ILF3AS1	0.00154	8.64508	9.13703	8.71986	9.20464
MGST3	0.00154	10.8613	8.90656	11.1914	9.44718
SLC25A32	0.00154	10.4597	9.73602	10.3839	9.64535
LONP1	0.00154	9.44271	9.90742	9.34885	9.91336
ZBTB44	0.00154	9.55562	10.3842	9.74386	10.6022
FLJ14107	0.00154	5.00352	5.46555	4.9223	5.51847
ZNF445	0.00154	7.09074	7.80936	7.18125	7.87032
MYRIP	0.00154	6.63048	3.94745	7.12752	3.94355
HDGF	0.00154	11.4684	10.9408	11.2249	10.8496
TMEM41A	0.00154	7.48433	8.06609	7.46839	8.08423
INO80	0.00154	8.53414	7.94747	8.54882	7.9399
AMN1	0.00154	6.70463	7.52315	6.85287	7.46991
TIPRL	0.00154	9.59904	9.98859	9.61694	9.94959
PPP2CB	0.00154	4.29975	4.64475	4.27238	4.63853
PLEKHG4	0.00154	5.92513	7.60845	5.93209	7.845
GPBP1L1	0.00154	8.93087	9.62159	9.15912	9.79694
CASP6	0.00154	9.27234	9.91992	9.38419	9.82198
KIFAP3	0.00154	8.74213	9.68063	8.58997	9.70595
FLAD1	0.00154	8.36953	7.76525	8.40953	7.80558
RGS13	0.00154	3.90478	3.55919	3.79596	3.41673
AKR1B1	0.00154	13.1424	12.3993	13.0434	12.3304
PHKB	0.00154	8.88749	8.41647	8.92778	8.50517
RAB28	0.00154	8.07908	8.68525	8.18643	8.87214
SETD9	0.00154	7.60278	5.80648	7.64547	5.60899
ZFP14	0.00154	4.88129	5.8429	4.86526	5.89673
SLC38A5	0.00154	8.12851	7.08927	8.21831	7.16358
TACC1	0.00154	8.34432	9.18777	8.30339	9.24566
OGDHL	0.00154	5.33698	6.49396	5.17013	6.51325
KCNH2	0.00154	5.04122	6.08535	4.95176	5.74208
ZNF275	0.00154	7.94096	8.59317	7.90911	8.77319
EXD3	0.00154	4.2951	3.98675	4.33715	3.96063
ITPR2	0.00154	6.43971	7.48557	6.18821	7.46974
CMAHP	0.00154	5.9168	8.15793	6.39776	8.43724
TRIM47	0.00154	5.81787	6.79496	5.89779	6.47784
ATXN2L	0.00154	5.75173	6.35548	5.79628	6.37593
TSHZ1	0.00154	8.4626	9.14374	8.40099	8.90807
F8	0.00154	6.50018	7.26863	6.35595	7.27421
ALDH4A1	0.00154	6.07346	5.28505	5.94915	5.23257
TUBG2	0.00154	6.02985	7.00808	5.83181	7.09361
PPP2R5D	0.00154	7.71239	8.21335	7.72805	8.25742
RGS12	0.00154	5.42729	4.80124	5.45892	4.68834
IRAK3	0.00154	5.44133	3.92257	5.12272	3.67361
MAP3K14AS1	0.00154	3.82386	4.11391	3.81124	4.15908
PYCR1	0.00154	8.52369	7.37424	8.72805	7.50008
TP53I11	0.00154	5.72178	4.94611	5.69862	4.74592
S100Z	0.00154	3.85367	4.57685	3.79984	4.60091
MARK2	0.00154	5.8127	6.10168	5.85128	6.14453
LOC100507043	0.00154	6.87293	4.62853	6.33789	4.64005
ADH5	0.00154	10.6269	11.2914	10.608	11.1881
BAI2	0.00154	5.22048	7.01424	5.02112	7.26254
C20orf27	0.00154	8.54539	7.97032	8.65348	8.10226
MYO1A	0.00154	4.04415	4.58103	4.05765	4.39093
GNB5	0.00154	7.85175	8.56039	7.9655	8.71451
ANKRD23	0.00154	5.07458	5.37136	5.02327	5.38834
PLEK2	0.00154	6.15595	5.54296	6.19899	5.53679
DPP7	0.00154	8.56932	7.61341	8.56591	7.31904
PRKCQAS1	0.00154	6.81779	8.01313	6.98123	8.22401
IGLL1	0.00154	12.4579	8.95562	13.5146	8.60721
TLX2	0.00154	3.68995	4.3296	3.68689	4.17643
MIB2	0.00154	6.31371	7.36963	6.41126	7.16415
PRKAR1B	0.00154	5.25203	6.27503	5.30828	6.26857
ZNF485	0.00154	5.67509	5.09376	5.52757	5.04549
GSDMB	0.00154	6.28813	7.55329	6.25892	7.6631
TRIM46	0.00154	4.85205	5.23456	4.82416	5.15379
C22orf46	0.00154	4.6608	5.09776	4.63964	5.0145
FCHO2	0.00154	5.62495	4.36246	5.81406	4.04963
CD151	0.00154	7.26259	6.34449	7.29075	6.2355
STX16	0.00154	8.69817	9.55185	8.79376	9.58927
CD200	0.00154	6.47866	4.39541	6.34058	3.9819
ZC3H6	0.00154	5.57287	6.51026	5.66818	6.44227
HCST	0.00154	5.12821	6.46839	4.91028	6.15642
DNPH1	0.00154	7.98237	9.27785	8.14273	9.24446
NOL8	0.00154	10.5405	9.84529	10.5009	9.84521
BCL2	0.00154	6.5269	5.56898	6.54721	5.62096
SNHG7	0.00154	7.63469	6.678	7.64346	6.63248
IL7R	0.00154	11.522	8.00108	12.2563	7.40902
PPP3CC	0.00154	8.7294	7.65922	8.79965	7.61947
LRIG1	0.00154	7.67951	5.89372	8.21509	6.06294
ADD1	0.00154	8.74755	9.26614	8.83619	9.27324
CD244	0.00154	4.50173	6.50823	4.35382	5.8659
EYA4	0.00154	5.48152	3.93888	4.91324	3.91274
CCR9	0.00154	4.09299	6.59015	4.09547	6.17571
THEMIS2	0.00154	5.93308	4.78756	5.70446	4.53518
SPATA5	0.00154	6.5785	7.10393	6.49036	7.07788
FGFRL1	0.00154	5.66627	5.20053	5.64583	5.19534
FERMT3	0.00154	9.5198	8.66248	9.43476	8.78233
C5orf20	0.00154	5.10292	3.98748	4.28493	3.95735
FXN	0.00154	6.50905	5.63348	6.56519	5.80689
CELF5	0.00154	4.30579	5.11946	4.20693	4.8773
HCG26	0.00154	5.04787	4.35244	5.01717	4.20856
SALL4	0.00154	5.59612	4.70645	5.46051	4.69232
CLUH	0.00154	8.41846	7.70957	8.35743	7.6571
TBC1D20	0.00154	7.06097	7.60668	7.02522	7.59981
OAF	0.00154	6.72394	6.25869	6.71211	6.2111
SPRY2	0.00154	8.70497	6.42036	8.95977	6.56592
RIC8B	0.00154	7.18741	7.71405	7.16025	7.77368
C1orf131	0.00154	10.6505	10.0985	10.6722	10.0592
CACNA1A	0.00154	5.05552	4.29084	4.63288	4.18602
NUP88	0.00154	11.4119	10.6951	11.4435	10.6067
RPRD1B	0.00154	8.06888	8.70087	8.18865	8.84802
HP1BP3	0.00154	10.6998	11.1241	10.7543	11.0944
NFATC1	0.00154	5.85393	6.73149	5.73556	6.87158
HDHD1	0.00154	9.06874	10.266	8.9608	10.2655
ANKRD33B	0.00154	7.76069	5.99981	8.05115	5.56125
C20orf194	0.00154	7.40447	5.98265	7.34822	5.53722
ZNF670	0.00154	8.2898	7.32029	8.41347	7.2721
LOC100505474	0.00154	4.06921	3.89868	4.08021	3.89799
EDEM3	0.001965	8.31306	9.15077	8.45351	9.27347
SLC25A53	0.001965	4.65756	4.16708	4.63239	4.02821
FOXP4	0.001965	5.93356	6.39795	5.91853	6.50663
HERC2	0.001965	7.82726	7.44959	7.84881	7.44756
SSX2IP	0.001965	6.68779	7.43874	6.84426	7.56107
LOC729296	0.001965	3.73977	4.47893	3.72974	4.25971
TMEM17	0.001965	5.69564	4.78194	5.62978	4.52905
GDF9	0.001965	4.53196	5.01527	4.53903	4.93421
MAPRE2	0.001965	10.0839	10.6633	10.2598	10.7706
ACOT8	0.001965	7.77287	8.31869	7.8918	8.19555
TMEM173	0.001965	6.17352	7.80007	5.83136	8.05903
EOMES	0.001965	5.10312	6.27881	4.81791	5.90992
PCMTD1	0.001965	8.84827	9.52378	8.89512	9.64685
SQSTM1	0.001965	5.89772	5.4075	6.04029	5.39166
RHOC	0.001965	8.85592	10.003	8.76925	10.0334
ACSL1	0.001965	8.0388	5.60803	8.35716	5.0514
GNAI1	0.001965	7.7677	4.03401	8.89912	4.09604
PHTF2	0.001965	6.77808	7.17825	6.78972	7.17861
SULF2	0.001965	4.30537	3.68304	3.87968	3.6798
ATG13	0.001965	8.10307	8.49787	8.15704	8.42186
NTS	0.001965	4.08239	4.38262	4.02225	4.32351
FAM160B2	0.001965	6.44914	6.87603	6.41074	6.98502
SEMA4C	0.001965	7.91403	7.21273	8.01252	7.26252
ARG2	0.001965	5.24052	6.49936	5.27592	6.50652
OSBP	0.001965	8.86331	9.15337	8.91305	9.23757
TERT	0.001965	6.88275	5.80305	6.86366	5.59586
RAB11FIP1	0.001965	6.67559	8.32296	6.89873	8.13936
N4BP2L1	0.001965	6.73689	7.68871	6.82926	7.8615
USP6	0.001965	6.74413	7.21921	6.7434	7.27733
LMLN	0.001965	4.99407	5.46948	4.96288	5.48375
GLB1L3	0.001965	3.95398	5.13506	3.58817	4.20306
UXS1	0.001965	10.0803	9.08235	10.0114	9.0305
METTL12	0.001965	6.42009	5.55082	6.28836	5.54001
CCDC34	0.001965	7.90914	8.76063	7.94447	8.85779
PRELID2	0.001965	7.81842	5.76572	8.10319	5.31656
ECHDC3	0.001965	5.59242	4.54051	5.37193	4.46837
FANCE	0.001965	7.32563	6.54442	7.27206	6.54635
PDE7A	0.001965	9.22626	10.1196	9.24197	10.1765
RAB33A	0.001965	5.29805	8.02704	4.49773	8.26016
LOC100505875	0.001965	3.95661	4.6212	3.76219	4.55058
ZBED1	0.001965	8.05239	7.06529	7.97094	6.99726
MRPL50	0.001965	9.35327	8.67996	9.16128	8.54797
NAP1L4	0.001965	9.49494	9.86454	9.60044	9.82641
OTUD5	0.001965	6.92943	7.28418	6.91689	7.24015
CHTOP	0.001965	10.2027	10.5958	10.2203	10.6017
FAM135A	0.001965	8.24026	7.14851	8.16784	7.57599
VPREB1	0.001965	10.5037	4.98287	12.0568	3.98572
CD99	0.001965	9.97123	11.8992	10.3632	11.9776
RTN3	0.001965	10.7208	11.3621	10.8112	11.3604
GDF11	0.001965	7.65834	6.84005	7.73955	6.84578
TSPAN13	0.001965	10.8297	8.38683	11.5938	8.26694
LMAN1	0.001965	8.20056	8.80536	8.16163	8.82943
MCFD2	0.001965	9.72274	9.15376	9.6467	9.18916
EPOR	0.001965	5.33164	5.9551	5.26341	6.03713
LANCL1	0.001965	9.41807	9.94026	9.4416	9.91492
ZBTB14	0.001965	7.11606	7.53635	7.08964	7.52432
FADS3	0.001965	8.6089	6.59614	8.19077	6.54472
LOC100507599	0.001965	7.20986	7.85925	7.11796	7.74352
RORA	0.001965	4.41666	5.68632	4.16027	5.72624
EHMT1	0.001965	7.69705	7.25922	7.62909	7.22432
PYCRL	0.001965	6.6425	5.83539	6.67104	5.80259
TMEM185A	0.001965	7.03027	7.71815	7.23026	7.74983
PRPS2	0.001965	9.14651	10.5058	9.76182	10.4499
MTMR6	0.001965	5.77741	6.4074	5.85518	6.40138
LOC151174	0.001965	4.51842	4.18375	4.56693	4.17815
SLC52A2	0.001965	7.89316	6.97308	7.87673	6.92051
FAM109B	0.001965	6.05706	5.35744	5.92401	5.28273
SCD	0.001965	7.4627	9.43582	7.7909	9.49265
RBMS3	0.001965	4.77343	4.24993	4.54127	4.21741
KIAA0141	0.001965	7.38672	6.9064	7.434	7.14299
NQO2	0.001965	7.92348	9.04627	7.61413	8.78854
CABIN1	0.001965	7.26051	7.88582	7.26273	7.9339
FLJ37453	0.001965	7.04157	7.80397	7.03768	7.7541
MTMR1	0.001965	8.43753	9.06062	8.36288	9.08507
ALDH7A1	0.001965	4.80232	4.17129	4.85571	4.02639
DSP	0.001965	4.38943	4.93568	4.35895	4.7803
TMEM8B	0.001965	5.46355	5.97516	5.42966	6.02252
ELOVL2	0.001965	6.253	4.36601	6.11868	4.133
ARIH2OS	0.001965	5.47185	6.30497	5.50525	6.30155
TEP1	0.001965	7.61891	6.8316	7.50627	6.71125
RGS18	0.001965	3.65232	5.81305	3.65053	4.28765
APCDD1	0.001965	7.05939	4.47812	7.61325	4.03057
FRMD6	0.001965	4.95113	7.21106	4.60874	7.32881
GGACT	0.001965	4.30036	5.26478	4.25346	4.97686
FKBP8	0.001965	6.15402	6.63264	6.27726	6.61758
SPATS2L	0.001965	7.48308	5.97979	7.46344	5.97441
CTSZ	0.001965	5.23813	4.18712	4.80156	4.0458
C10orf82	0.001965	4.1961	4.0011	4.15451	3.99297
TMEM133	0.001965	5.9062	4.57106	5.86351	4.15392
FOXF2	0.001965	4.57734	4.24793	4.56986	4.19941
ATP6V1G2	0.001965	5.07124	6.22727	4.92229	6.49705
LOC100505746	0.001965	4.70385	5.78866	4.36	5.63783
NEK8	0.001965	7.40074	6.78366	7.3451	6.75636
NUDT6	0.001965	7.29132	8.02239	7.27554	7.8852
ZFP3	0.001965	6.52281	4.53782	6.71371	4.33939
PSMG2	0.001965	12.3642	12.1561	12.3894	12.1434
ZNF540	0.001965	4.40359	4.90616	4.37819	4.97694
GMIP	0.001965	6.67866	6.16717	6.71881	6.12657
MSL2	0.001965	9.71284	10.8195	9.70111	10.8874
GGNBP2	0.001965	9.68064	10.1083	9.66564	10.1091
TREML2	0.001965	5.66364	6.35607	5.64661	6.31036
SLC1A3	0.001965	4.26724	3.96091	4.16146	3.96433
ALDH1B1	0.001965	5.84743	4.89109	6.03805	4.80113
A2M	0.001965	4.63897	3.98484	4.30035	3.88889
LINC00294	0.001965	8.25153	8.9961	8.40969	8.96172
RNF44	0.001965	9.22294	10.0826	9.24784	10.1681
LCP2	0.001965	8.10056	9.64544	8.13812	9.89979
NEK7	0.001965	10.2906	11.3162	10.3667	11.2354
FAAH2	0.001965	4.9796	5.67715	4.90321	5.68881
CLIP3	0.001965	4.28388	5.06549	4.32571	4.56452
NCOA1	0.001965	8.03937	8.57952	8.02689	8.58035
CARKD	0.001965	7.80028	9.18294	8.2035	9.38539
PAPSS1	0.001965	9.90778	10.7113	9.87124	10.8155
NAT14	0.001965	7.72925	8.74809	8.02363	8.8946
STK17A	0.001965	6.5337	7.6668	6.39561	7.75728
UVSSA	0.001965	6.2012	6.80901	6.23331	6.88064
DCAF15	0.001965	7.01341	7.60262	7.15537	7.45953
SOGA3	0.001965	3.84453	4.73651	3.86644	4.81352
TRIM39	0.002485	7.23307	7.64705	7.32193	7.66415
FOCAD	0.002485	6.82131	8.79126	7.43183	8.96529
CRNDE	0.002485	10.2635	10.9871	10.9102	11.6403
MEA1	0.002485	10.557	11.0756	10.4795	11.0588
PIGH	0.002485	7.16883	8.83379	7.47079	8.7457
LOC100129550	0.002485	5.37966	6.65874	5.38966	6.70089
NR3C1	0.002485	10.2796	9.20037	10.555	9.15923
TLE4	0.002485	8.71514	6.33529	9.26124	7.01884
SNAPC4	0.002485	7.77398	7.12962	7.67987	6.93445
ZNF618	0.002485	8.26806	6.1065	8.59882	5.90954
TTC19	0.002485	10.4198	10.7544	10.4465	10.735
ABCC1	0.002485	8.49633	9.2227	8.5933	9.36199
PDCD4AS1	0.002485	5.1234	5.8903	4.99965	5.88525
TNFRSF17	0.002485	5.48842	3.79169	5.10604	3.77528
RBM4B	0.002485	8.83566	8.17857	8.87387	8.23002
ARID1A	0.002485	9.40325	9.86715	9.48716	9.89536
SFT2D2	0.002485	7.29864	6.60603	7.31468	6.44116
TRUB1	0.002485	6.9351	6.58175	6.88578	6.57226
SAP130	0.002485	9.05497	9.48354	9.06694	9.49174
STOM	0.002485	8.07265	5.82513	8.00466	4.76496
SGSM3	0.002485	7.79509	7.1964	7.77771	7.11593
LOC100616668	0.002485	4.06229	4.30209	3.99279	4.22566
IGF2R	0.002485	8.83666	9.61364	8.81093	9.43615
CYFIP1	0.002485	11.5471	8.80798	11.3536	8.48025
C19orf73	0.002485	4.6736	5.05587	4.70667	5.05211
HLADQA1	0.002485	6.07599	3.90868	4.4869	3.89326
NOTCH1	0.002485	6.40397	7.86836	6.44235	7.98969
DFNA5	0.002485	9.96997	6.64146	10.8904	6.28526
SEMA7A	0.002485	4.73585	5.33899	4.58492	5.14642
NME5	0.002485	4.8497	4.19955	4.63987	4.22967
PHF1	0.002485	7.63115	8.21542	7.62721	8.21444
SBK1	0.002485	6.10593	7.58877	6.01844	7.46337
RALGAPA1	0.002485	8.95332	9.78864	8.93515	9.9106
AZI2	0.002485	7.25322	7.82513	7.25999	7.89389
ASRGL1	0.002485	6.33984	8.46907	5.7693	8.99321
SIAE	0.002485	6.22049	5.45732	6.03673	5.40435
C1orf200	0.002485	6.77249	6.53915	6.73958	6.5343
LRIG2	0.002485	6.0356	6.36218	6.11029	6.4151
DDX60	0.002485	6.70853	7.78986	6.63881	7.6678
LOC100630918	0.002485	5.73267	6.49195	5.73543	6.38834
BAX	0.002485	8.13398	7.21227	7.87427	7.24393
B4GALT6	0.002485	6.59406	8.11158	6.73825	8.30985
GLOD4	0.002485	9.88134	10.4871	9.87795	10.5609
CRMP1	0.002485	8.09111	5.28756	8.91388	5.17012
BRD2	0.002485	10.0018	10.4077	9.91654	10.5021
ZSCAN12	0.002485	4.99437	4.19991	5.06524	3.93326
RUFY3	0.002485	7.26591	8.55599	6.98106	8.51444
HIRA	0.002485	8.94581	9.74353	8.78402	9.63897
SETDB2	0.002485	7.19909	6.12079	7.27957	6.09102
UNC13D	0.002485	5.094	5.85733	5.10245	5.71453
MAP3K1	0.002485	8.69971	6.61366	8.3351	6.52157
LAMB2P1	0.002485	5.01977	5.80343	5.14508	5.72021
PLD1	0.002485	6.42901	4.80883	7.1762	4.80797
DHX33	0.002485	9.98091	9.40878	9.93452	9.50244
STARD7	0.002485	12.1563	11.8251	12.1456	11.9374
PVT1	0.002485	5.66456	5.22066	5.54927	5.23374
DSTNP2	0.002485	5.22433	5.89688	5.333	5.91588
RILP	0.002485	7.34653	6.46616	7.34354	6.15099
ZNF335	0.002485	7.02368	7.30456	7.0709	7.30089
STXBP1	0.002485	7.0746	8.87843	7.21295	8.91414
SRSF4	0.002485	10.7125	11.0596	10.7538	11.0488
ZNF175	0.002485	6.56973	7.50887	6.72252	7.52711
HCN3	0.002485	4.84262	5.33123	4.88466	5.33828
ZSCAN31	0.002485	6.56946	5.62766	6.7456	5.66022
CCDC163P	0.002485	6.50887	7.21745	6.39257	7.39918
C1GALT1	0.002485	7.2205	7.97378	7.26032	7.95477
FRA10AC1	0.002485	5.62155	6.07538	5.57591	6.11566
MYLK	0.002485	9.15017	5.15833	10.2366	5.02094
WDR81	0.002485	7.72524	7.16939	7.68899	7.02411
ERCC1	0.002485	9.40491	8.90039	9.43302	8.97858
GNG12	0.002485	5.47169	4.71578	5.26939	4.72317
ANKMY2	0.002485	8.84293	10.0235	9.42898	9.97127
PPM1F	0.002485	7.72814	7.03941	7.6181	6.9365
DBT	0.002485	7.11159	7.57244	7.13807	7.54822
MPV17	0.002485	8.66256	7.9986	8.71068	7.88073
CSF1R	0.002485	5.2452	4.35183	4.96883	4.3274
SYNRG	0.002485	8.10346	8.68949	7.9433	8.73847
FGR	0.002485	5.21629	6.85764	4.74076	5.86259
R3HDM2	0.002485	8.27995	9.03073	8.34501	9.21192
SIGLEC10	0.002485	4.39785	3.9045	4.34943	3.88361
XYLT1	0.002485	5.38531	4.55457	5.56022	4.25004
NSUN2	0.002485	8.95513	8.6946	8.96794	8.80105
TMPRSS3	0.002485	4.34665	5.62896	4.11457	5.71111
FLT3LG	0.002485	4.41657	5.50661	4.30188	5.19208
LOC100506075	0.002485	4.75959	5.39669	4.65017	5.33471
MGAT4A	0.002485	6.89884	8.65456	7.23335	8.87378
NHP2	0.002485	11.7311	11.0773	11.7352	11.0552
YOD1	0.002485	4.66181	5.63193	4.55759	5.52767
NF1	0.002485	6.61723	7.18425	6.68246	7.21314
FABP6	0.002485	4.34297	4.93672	4.23144	4.57513
PRKCA	0.002485	6.26957	7.32632	6.25268	7.24071
SEPN1	0.002485	6.80259	5.87514	6.87175	5.80113
CEP135	0.002485	9.01817	9.46021	9.02963	9.3326
CIITA	0.002485	4.20839	3.86898	4.21328	3.8614
APBB1	0.002485	4.1086	4.72907	4.10686	4.4412
EEF2K	0.002485	9.57572	8.71979	9.51821	8.90918
DDC	0.002485	4.25983	5.00728	4.27346	4.60552
IL32	0.002485	4.20336	7.66217	3.84978	8.10715
ATP7B	0.002485	5.18626	5.914	5.04069	5.54897
PLEKHA8	0.002485	5.3158	5.89063	5.42024	5.94243
GCSAM	0.002485	8.20077	5.6879	8.40977	4.71514
CCL5	0.002485	5.25548	4.12788	4.48905	3.78933
ADO	0.002485	9.65413	9.29094	9.63194	9.27456
NIP7	0.002485	9.81151	9.26083	9.96806	9.25146
SIRPA	0.002485	5.73319	5.13448	5.42844	5.11051
CACNA2D4	0.002485	6.04536	4.51023	5.72576	4.4411
ZNF599	0.002485	3.80912	4.24227	3.83983	4.19598
RORC	0.002485	4.45268	5.58821	4.46266	4.83542
PTPRU	0.002485	5.17806	5.94552	5.28549	5.78305
NINJ1	0.002485	7.96524	6.96259	8.04396	6.93811
PSMB10	0.002485	10.2226	9.44234	10.2864	9.53418
NPHP4	0.002485	7.35979	8.03234	7.39774	7.81964
STEAP3	0.002485	4.91368	4.40429	4.96465	4.31234
LIME1	0.002485	5.83073	7.02299	5.66448	7.03006
TEAD4	0.002485	7.21152	5.26679	7.93248	4.88692
ZNF589	0.002485	6.00589	6.68047	5.84477	6.73238
PRUNE	0.002485	7.69012	8.10449	7.62049	8.02553
ITM2B	0.002485	11.6339	12.3887	11.9601	12.4682
SAT2	0.002485	8.86895	7.66698	8.84795	7.72472
PAAF1	0.002485	9.06866	9.50066	9.09379	9.50797
PTMS	0.002485	4.10541	5.42303	3.68814	5.57397
TTI1	0.002485	9.0014	9.32905	8.98009	9.29476
FLII	0.002485	8.98132	9.47134	8.91355	9.46716
TGFBR2	0.002485	8.75571	6.87317	9.09339	7.17884
YPEL2	0.002485	5.96147	5.0636	6.09603	4.90771
ZNRD1	0.003123	10.1785	10.6745	10.1349	10.6551
NSUN4	0.003123	7.86774	7.62435	7.8375	7.71996
TMEM52	0.003123	4.40176	3.71183	4.35902	3.72204
ACBD4	0.003123	5.67709	6.22496	5.71388	6.28831
PCOLCE	0.003123	5.8071	6.95041	5.74002	7.26718
ZFP1	0.003123	9.07054	9.72765	8.96377	9.64844
SLC7A1	0.003123	7.78634	8.30285	7.76423	8.3958
PPP1R14C	0.003123	5.35796	4.60658	4.93392	4.56042
DCAKD	0.003123	7.0167	7.57365	7.17946	7.58968
LOC100505912	0.003123	4.60894	4.06834	4.47481	4.10234
CERS6	0.003123	8.60812	7.55186	8.70164	8.02277
SEC22A	0.003123	6.44311	6.88012	6.38466	6.92683
ODF2L	0.003123	5.23089	6.03625	5.29379	6.0137
SLC25A16	0.003123	7.09547	6.69062	7.04134	6.54771
LOC100505573	0.003123	7.45904	6.6056	7.56587	6.57566
CTNS	0.003123	7.34772	6.57996	7.10051	6.59165
SH2B2	0.003123	7.44365	6.59122	7.5218	6.55147
APOC1	0.003123	5.99939	5.47036	5.97857	5.47717
LOC100505920	0.003123	4.11947	5.38073	4.15581	4.53991
HERPUD2	0.003123	7.7917	8.47813	8.07141	8.50188
MKI67IP	0.003123	10.672	9.92299	10.7417	9.96877
C15orf48	0.003123	4.39511	4.15284	4.4066	4.12596
TSPYL4	0.003123	9.65106	10.6279	9.70248	10.8476
ERN1	0.003123	4.30274	4.60763	4.28742	4.55431
C16orf72	0.003123	8.10648	8.44902	8.07158	8.5216
LOC100128176	0.003123	3.56459	3.45124	3.58405	3.4076
DCAF7	0.003123	9.34788	9.86485	9.35047	9.85942
CD86	0.003123	4.63434	3.8839	4.16003	3.85898
NAGPA	0.003123	7.1278	6.21248	7.16562	6.37433
ZNF133	0.003123	6.43584	6.92698	6.396	6.81889
XBP1	0.003123	11.9589	9.42089	11.753	10.3667
XKR6	0.003123	4.41463	4.08685	4.31281	4.08975
TNFRSF11A	0.003123	4.90657	4.56629	4.97975	4.54125
GRB10	0.003123	8.26163	6.27454	8.47579	6.30656
KIF2C	0.003123	10.1467	10.7223	10.2689	10.7011
LAGE3	0.003123	8.95515	9.6351	8.82089	9.77262
SUSD3	0.003123	7.52903	5.38209	7.28069	5.20106
FSD1L	0.003123	6.35988	5.3838	6.32658	5.2825
TCF4	0.003123	9.39706	6.32099	9.81071	6.11221
LOC100507547	0.003123	4.71011	5.39375	4.53985	5.56427
MGC16142	0.003123	5.45111	6.01626	5.39094	6.00132
ECT2	0.003123	9.47078	10.1195	9.53845	10.0646
LRRC63	0.003123	3.70878	4.15426	3.72624	4.15325
JAM2	0.003123	6.58708	4.94104	7.01092	4.88709
HSPA2	0.003123	6.23559	5.21417	6.0251	4.97432
CLCN3	0.003123	8.12368	8.84929	8.14887	9.09454
MAPK6	0.003123	10.7544	11.4956	10.8909	11.3332
LOC100505932	0.003123	6.29828	7.00819	6.11941	6.74113
NFIX	0.003123	6.03996	5.4766	5.90574	5.35887
GRN	0.003123	8.66208	7.54169	8.98519	7.63825
SEC61G	0.003123	11.7865	12.3126	11.8628	12.3792
PLEKHA5	0.003123	6.13573	7.78067	7.14215	7.86972
PCYT2	0.003123	5.70944	5.20348	5.71119	5.12789
PPP3CA	0.003123	10.1903	9.42892	10.1467	9.61231
TOMM34	0.003123	8.49716	8.04321	8.4526	7.99838
ANKRD46	0.003123	8.59397	9.46621	8.71472	9.52175
PEX5	0.003123	6.54495	7.343	6.4778	7.21761
THSD7A	0.003123	5.29926	3.9575	4.1377	3.81873
FZD3	0.003123	6.85173	5.38192	6.52177	5.26647
TPX2	0.003123	11.4683	12.0737	11.6005	12.0411
GNA12	0.003123	8.25957	7.57983	8.31502	7.62814
LOXL1	0.003123	3.4987	4.318	3.43044	4.30886
PLXDC1	0.003123	3.98856	4.89156	3.96564	4.33368
NSRP1	0.003123	9.42542	9.01716	9.46658	9.03992
MPPE1	0.003123	7.34095	8.00555	7.26691	8.16661
KCTD2	0.003123	7.12493	7.59922	7.13492	7.68616
SLC8A1	0.003123	4.94627	4.35788	4.76221	4.23708
KDM3A	0.003123	9.78711	10.5013	9.70806	10.4085
VPS37A	0.003123	7.79645	8.39669	7.8838	8.44249
PLOD2	0.003123	4.65384	3.6872	3.83961	3.6617
POMT1	0.003123	6.23189	7.32395	6.25429	7.43651
CEP44	0.003123	7.66961	8.24092	7.63509	8.20119
LOC100505634	0.003123	4.98904	6.00611	4.97448	5.86835
CD99P1	0.003123	7.06177	7.95443	7.05623	7.97819
CANT1	0.003123	7.68305	8.44761	7.6981	8.52504
KIAA1804	0.003123	5.08354	6.71881	4.59145	7.05535
ARVCF	0.003123	5.81473	5.50365	5.83795	5.48791
LOC100505801	0.003123	7.18667	3.34294	6.33704	3.3391
ENPP4	0.003123	5.57095	7.81032	4.55456	7.80335
B3GAT3	0.003123	6.12565	6.61479	6.1889	6.55999
VPS37C	0.003123	7.4829	6.76747	7.3188	6.77282
IRAK1	0.003123	8.73586	8.13739	8.91376	8.18541
NUP37	0.003123	10.8228	11.3945	10.7199	11.2953
KIF7	0.003123	5.61964	6.59469	5.5608	6.72188
C1QBP	0.003123	12.9607	12.5428	12.9922	12.6806
PDGFRB	0.003123	5.96265	4.7852	6.04593	4.74887
TBC1D10C	0.003123	6.90613	8.75508	6.35201	8.81489
ANKFN1	0.003123	3.97724	4.36058	3.8903	4.23473
FAH	0.003123	7.71032	8.67722	7.49438	8.70674
ZNF329	0.003123	7.16054	8.36944	7.6494	8.30157
ZNF521	0.003123	3.67701	6.32315	3.58372	6.64369
JUN	0.003123	5.33117	6.75233	4.95011	6.55244
PLEKHA3	0.003123	8.07926	8.41671	8.08714	8.44417
FBP1	0.003123	4.6812	4.21112	4.44	4.17787
ZXDA	0.003123	4.85487	5.79011	4.50186	5.81556
GID4	0.003123	7.079	7.86566	6.9754	7.75442
TRIM22	0.003123	10.9476	8.51321	10.8721	9.75689
CARD8	0.003123	9.10555	8.3176	8.92514	8.12418
ITGAL	0.003123	5.48832	7.61392	5.39797	7.07754
PRR24	0.003123	6.98498	7.68406	6.95953	7.58518
C9orf9	0.003123	6.16599	7.4653	6.08487	7.12985
CCDC15	0.003123	6.95909	8.34937	7.01809	8.60627
TANK	0.003123	8.38122	8.70714	8.05371	8.70544
TOPORSAS1	0.003123	6.65039	7.35279	6.71358	7.14336
CAMK4	0.003123	5.38957	7.38386	4.89513	7.43392
HCK	0.003123	5.38841	4.18203	4.65714	4.00851
RTFDC1	0.003123	9.56503	9.80412	9.61319	9.77376
STAU1	0.003123	10.6287	11.1256	10.657	11.1842
ORAI3	0.003123	8.43226	6.54485	8.64859	6.05977
FAM63A	0.003123	6.84523	6.40874	6.72993	6.37887
HPSE	0.003123	6.21912	5.04899	6.14193	4.85045
FAM3A	0.003123	6.01416	6.40409	6.00906	6.44965
ARHGAP27	0.003895	5.34235	5.96784	5.35939	5.88086
SYPL1	0.003895	9.78293	11.0346	9.95866	11.0408
GANAB	0.003895	10.0764	10.3801	10.1553	10.3573
TMED9	0.003895	10.3484	9.67076	10.2555	9.6391
RHBDD2	0.003895	7.74191	8.434	7.71963	8.65635
PTCH1	0.003895	5.22318	4.4215	5.10988	4.32889
BACE1	0.003895	6.13829	5.63706	6.10529	5.57628
EEPD1	0.003895	4.61487	5.10341	4.5584	5.12926
ARSE	0.003895	5.06404	4.4305	4.86045	4.47956
TFPI	0.003895	3.85788	5.63477	3.5195	5.64875
LOC100507309	0.003895	6.99838	5.58569	7.48528	5.21815
PRR5L	0.003895	6.83718	4.86654	7.77988	4.60238
CMIP	0.003895	7.74767	8.26981	7.70204	8.30532
CREBBP	0.003895	7.3583	6.83776	7.48945	6.78743
DUSP18	0.003895	6.11827	6.64088	6.03978	6.52297
PPAPDC3	0.003895	5.32945	4.90861	5.15331	4.89816
GGH	0.003895	11.3247	9.2395	11.7475	10.1955
NIN	0.003895	8.7023	7.87354	8.77068	7.71848
PRKACA	0.003895	5.86481	6.14503	5.80119	6.11949
LZTS1	0.003895	3.87921	4.22676	3.84433	4.16198
SERAC1	0.003895	6.04839	7.08846	5.85146	7.24393
CCDC81	0.003895	7.83684	4.55823	8.66736	4.47215
ANGPTL2	0.003895	4.9504	4.43492	4.80638	4.32258
MAP2K1	0.003895	10.3063	10.9309	10.1358	10.895
PRDX6	0.003895	11.9509	11.5674	11.8562	11.6227
GAS2L3	0.003895	6.33835	4.95036	6.57564	4.5472
NPR2	0.003895	4.74823	5.04617	4.71645	5.02831
HAP1	0.003895	5.26828	4.9888	5.23951	4.95785
S'MARCD3	0.003895	5.07844	6.23536	5.04775	6.2552
ARHGAP9	0.003895	6.95957	8.08634	6.96519	8.26827
ADNP2	0.003895	8.85188	9.47018	8.80814	9.52133
SMAD2	0.003895	8.87529	9.18504	8.81064	9.13769
RELT	0.003895	7.32059	6.94789	7.26594	6.96981
KIAA1715	0.003895	7.89107	8.45073	7.8177	8.49302
MT1F	0.003895	8.42152	6.41834	8.84647	6.26743
KIAA1875	0.003895	3.95838	3.75643	3.91578	3.75653
PNP	0.003895	11.0637	10.1763	10.7708	10.2673
NDST1	0.003895	5.38713	5.1248	5.39401	5.16417
LOC100506948	0.003895	7.53825	8.7237	7.74685	8.57911
FUCA1	0.003895	8.91465	6.97478	9.09606	7.92416
MRPL12	0.003895	10.7286	10.1191	10.8068	10.0881
ZMYND19	0.003895	8.83713	8.34018	8.9025	8.27696
CEP128	0.003895	7.50418	8.26963	7.55762	8.38256
SLC14A1	0.003895	3.57915	4.79249	3.56015	4.04195
DIP2A	0.003895	5.29171	5.62499	5.24633	5.59536
ZNF704	0.003895	6.19143	4.93323	6.39597	4.86972
CECR2	0.003895	4.51866	4.09687	4.44717	4.08534
PIK3CD	0.003895	8.03631	7.03211	8.36613	6.83467
ALKBH5	0.003895	7.33477	7.76815	7.27176	7.69528
TSPAN31	0.003895	8.15332	7.21558	8.23913	7.17708
WASL	0.003895	6.77225	7.12773	6.68229	7.09728
PRRT1	0.003895	4.2137	4.44806	4.16833	4.39021
KCTD13	0.003895	6.74874	7.29447	6.94656	7.24
TSPAN3	0.003895	9.79233	9.44611	9.8881	9.47773
ASL	0.003895	7.52994	6.06152	7.51665	6.37209
SLC16A6	0.003895	4.67847	6.15382	4.4985	6.50832
CASP1	0.003895	8.02106	5.79888	7.84246	5.00485
C14orf37	0.003895	4.2456	3.62695	3.99343	3.63355
MYOF	0.003895	4.82336	4.33467	4.73527	4.34867
CYTH3	0.003895	4.88845	4.32316	4.89118	4.26408
FJX1	0.003895	8.06975	6.15575	8.50154	6.04488
SNHG15	0.003895	9.27161	9.91674	9.27691	9.89135
TRAF3IP2	0.003895	9.6275	8.2504	9.60621	8.44966
KIAA1377	0.003895	3.92763	4.67129	3.92029	4.40079
TMEM189	0.003895	7.10575	7.54766	7.04566	7.53437
MORN3	0.003895	5.1474	5.48794	5.13199	5.53365
SLC35E3	0.003895	10.241	8.52677	10.2443	8.60858
RNF114	0.003895	9.9034	10.2721	9.89536	10.3151
FHL1	0.003895	9.08116	6.74226	9.68986	6.67811
WDR88	0.003895	3.98436	3.81282	3.97057	3.7704
TCP11	0.003895	4.15895	4.47261	4.12008	4.50902
KLHL3	0.003895	5.56459	6.0483	5.52486	6.00155
LOC100505930	0.003895	5.12683	4.64103	5.23813	4.75589
RAB20	0.003895	7.38987	6.39619	7.38891	6.29564
LILRB4	0.003895	4.544	3.44113	3.87879	3.47215
LOC100507257	0.003895	4.78155	4.51096	4.71183	4.50148
IL15RA	0.003895	6.40431	5.62922	6.39599	5.65453
FAM64A	0.003895	9.72052	8.7313	9.85897	9.10215
PARS2	0.003895	6.5252	6.93291	6.41052	6.89832
PRKCSH	0.003895	9.30765	9.82541	9.35401	9.92536
MFI2AS1	0.003895	5.40133	6.51513	5.42833	6.37808
ZCWPW2	0.003895	3.58344	3.79709	3.56206	3.73999
TPRN	0.003895	5.70208	5.11702	5.56724	4.94451
CHST2	0.003895	6.47275	8.952	4.97526	8.82976
TSTD1	0.003895	8.76674	10.0345	9.33428	10.1131
RBM7	0.003895	9.51882	9.90503	9.52678	9.86008
CHML	0.003895	7.69164	6.90822	7.68414	6.96624
SIT1	0.003895	5.94285	7.80224	5.71885	7.41884
GAL3ST3	0.003895	4.23809	4.501	4.239	4.38441
USP47	0.003895	8.36399	8.79337	8.31434	8.87035
BBS10	0.003895	6.87151	7.64727	6.69491	7.64886
VDR	0.003895	5.84623	5.08603	5.87224	4.87427
FLYWCH2	0.003895	6.56011	7.0911	6.63138	7.08537
TRIM44	0.003895	11.0129	9.42525	11.0161	10.0413
PCSK6	0.003895	4.66787	4.35203	4.58162	4.3449
DANCR	0.003895	10.8636	9.68535	10.9991	9.66589
ANKRD9	0.003895	7.80324	5.85984	7.65077	5.11113
UPRT	0.003895	8.09215	8.50515	8.0474	8.52814
NPAS2	0.003895	4.50727	5.21578	4.4667	4.92075
KCNIP3	0.003895	4.34631	4.51392	4.36124	4.48521
LOC100505794	0.003895	4.19679	3.74501	4.05696	3.77432
LACC1	0.003895	4.38525	3.99502	4.24999	3.92828
PLEKHM3	0.003895	6.34255	7.09264	6.33606	7.30521
PDE9A	0.003895	4.06555	5.44197	4.03022	5.78882
SLCO5A1	0.003895	4.66049	3.96329	4.20376	3.96149
LOC100506125	0.003895	4.29401	3.91656	4.2018	3.95721
RPS6KA3	0.003895	8.97339	9.57044	8.90309	9.55838
NINL	0.003895	5.90869	8.56987	5.30481	9.00055
RRM2B	0.003895	8.60979	7.77925	8.63071	7.96406
EMID1	0.003895	5.13846	6.05347	4.82377	5.75989
STARD13	0.003895	5.0849	4.22452	5.03217	4.18392
FKBP15	0.003895	9.0516	8.60922	9.05312	8.60255
BORA	0.003895	9.21505	9.77841	9.1207	9.78489
DRAP1	0.003895	8.90194	9.39936	8.93925	9.48389
GRHL1	0.003895	4.89099	5.38585	4.87486	5.39016
PFKL	0.003895	8.26126	7.38718	8.24521	7.36022
LNX2	0.003895	8.03433	8.77684	8.23957	9.03244
MB21D1	0.003895	7.99072	5.59885	8.24629	4.58878
HECTD1	0.003895	8.53101	7.96612	8.52958	8.00226
PRKCB	0.003895	6.30711	7.93239	7.17	8.58955
OSBPL1A	0.003895	7.92109	6.25651	8.58835	6.87839
PIGU	0.003895	8.35722	8.89493	8.27951	8.91336
RHOU	0.003895	4.67587	7.2534	4.46943	6.91411
SELRC1	0.003895	9.36631	8.40854	9.3494	8.26147
CEP85	0.003895	8.36969	8.90032	8.32654	8.87825
ATXN2	0.003895	7.9702	8.29511	8.01442	8.32274
NLRC3	0.003895	8.37751	9.37898	8.54117	9.43211
HLX	0.003895	7.47378	4.60624	8.67274	4.59787
TMOD2	0.003895	4.45733	5.41256	4.47846	5.46706
NCOR1	0.003895	8.39241	9.02025	8.51277	8.99558
NDN	0.003895	4.93935	7.60172	4.97583	7.51168
LOH12CR2	0.003895	4.26204	4.56567	4.22128	4.59131
PFKFB2	0.003895	4.98281	5.37653	4.992	5.33752
CD99L2	0.003895	7.00301	7.41665	6.97082	7.40407
LRRC58	0.003895	9.50187	9.93592	9.55248	9.98187
NOL4	0.003895	5.43157	3.8915	4.77217	3.92788
LYSMD3	0.003895	8.76521	9.20922	8.82255	9.16321
GSTM3	0.003895	5.63022	6.34408	5.61563	6.00997
KIAA0907	0.003895	10.6249	11.0915	10.5538	11.072
C19orf77	0.003895	7.3155	9.3053	7.34909	10.1952
ATP5G1	0.003895	10.1818	9.28458	10.239	9.37981
FAM159A	0.003895	4.74773	4.12668	4.50939	4.09177
CCDC64	0.003895	4.88846	5.30366	4.90653	5.24563
AEN	0.003895	8.05562	7.55978	8.02196	7.60429
UBE2J1	0.003895	10.1765	9.34404	10.0849	9.50306
GNB4	0.003895	8.95185	8.05682	9.14718	8.16611
PIAS2	0.003895	8.10357	7.69764	8.16387	7.64723
SPINT1	0.003895	5.85978	4.66737	5.99793	4.39431
TRRAP	0.003895	8.9613	9.45371	8.90644	9.44695
ABHD4	0.003895	7.09606	5.99587	6.78716	5.8965
KBTBD7	0.003895	6.64675	8.17224	7.02631	8.10859
ACTL10	0.003895	4.79784	4.36255	4.80647	4.26496
MYO7A	0.003895	4.65351	4.34833	4.59209	4.3617
CITED4	0.003895	4.92624	4.22152	4.61544	4.25617
TMEM192	0.003895	7.77318	6.80572	7.7153	6.67781
UNKL	0.004827	5.42096	5.1178	5.3529	5.03163
SHB	0.004827	5.29657	5.76277	5.33641	5.60764
PHOSPHO2	0.004827	6.9346	7.60677	6.83935	7.75235
NRP2	0.004827	4.72946	4.30249	4.46518	4.30564
LOC729991	0.004827	6.82247	6.36951	6.87651	6.30067
GEM	0.004827	4.502	5.21772	4.09055	4.98685
CITED2	0.004827	7.2317	6.36289	7.17462	6.29685
SERPINB10	0.004827	3.93053	3.75195	3.92986	3.74398
HTRA3	0.004827	6.68362	4.91606	6.31223	4.89243
CEP57	0.004827	9.76964	10.3604	9.65433	10.2703
DIP2C	0.004827	7.60142	5.48628	8.32155	5.1768
CD72	0.004827	7.86833	5.70006	8.3284	5.40433
ARRDC2	0.004827	7.8645	6.59507	8.07991	6.80005
RBBP4	0.004827	8.95859	9.64361	9.10542	9.54706
RHBDD3	0.004827	5.52638	6.13212	5.42447	6.21196
PHKA1	0.004827	4.3186	6.01998	4.29479	6.80121
TMEM167B	0.004827	9.90386	10.2538	9.92161	10.3322
CBX4	0.004827	8.78946	9.51027	8.74185	9.55992
EXOC5	0.004827	8.71045	9.24729	8.84329	9.20808
SMURF2	0.004827	9.408	10.0389	9.31773	9.97689
PILRA	0.004827	4.48189	4.75123	4.21818	4.54207
MAPK14	0.004827	8.57509	8.88382	8.55195	8.75411
LOC100131354	0.004827	5.65092	5.23506	5.64609	5.23598
EXTL2	0.004827	8.02035	8.90079	7.91085	8.935
ULK1	0.004827	7.14533	7.77529	7.24731	7.66934
LRP12	0.004827	5.43528	7.512	5.31002	7.37148
WHSC1	0.004827	8.79954	9.41294	8.68717	9.61027
MRPS12	0.004827	6.99521	6.49739	7.0124	6.64579
ARHGEF12	0.004827	5.84679	4.96778	5.94943	4.8312
NOG	0.004827	8.21016	4.58696	9.10234	4.17579
PLXDC2	0.004827	4.91966	3.58119	3.80975	3.51674
LRP3	0.004827	5.25948	4.86774	5.14521	4.81134
NGFRAP1	0.004827	7.29986	11.2822	5.42733	12.6071
STK10	0.004827	8.67931	7.78747	8.55663	7.63124
LENG9	0.004827	4.37686	4.11173	4.36892	4.13223
SARNP	0.004827	8.01335	8.40094	7.97181	8.56281
MKS1	0.004827	6.00499	6.41457	5.98586	6.4297
HMX2	0.004827	6.59101	4.62979	4.93569	4.34493
TSPYL2	0.004827	7.38968	7.85612	7.46663	7.73993
DNASE1L1	0.004827	7.4208	6.8178	7.40738	6.83235
SSH3	0.004827	6.48494	5.90007	6.25985	5.86336
PINK1	0.004827	6.51533	7.21423	6.54107	7.5297
TLE1	0.004827	8.34541	6.53687	8.43633	6.15062
ATHL1	0.004827	7.23375	8.58748	7.33285	8.8743
ANKLE1	0.004827	7.08297	5.15318	7.56415	4.7773
MAK	0.004827	4.45861	4.73214	4.46834	4.6766
ERGIC1	0.004827	9.70874	8.66614	9.75489	8.58047
UBE2K	0.004827	10.4337	10.155	10.4942	10.1334
DHX58	0.004827	5.60513	6.02266	5.65448	5.87498
RAB27B	0.004827	4.33322	4.84399	4.35178	4.66005
EIF3K	0.004827	12.0123	11.6973	12.0166	11.6317
IFITM1	0.004827	9.25574	11.7029	9.34209	11.9964
ARSK	0.004827	6.60234	7.37153	6.70225	7.25155
KIF22	0.004827	8.90651	9.3449	8.97331	9.41074
SERPINB6	0.004827	6.89468	4.97342	7.07188	4.33563
LOC155060	0.004827	4.58926	4.9906	4.5291	4.96758
LOC100507015	0.004827	8.79495	8.23807	8.78816	8.19355
BRD4	0.004827	8.328	8.58876	8.32585	8.59893
TMEM170B	0.004827	6.63151	8.24071	6.62634	8.60929
STARD3	0.004827	6.18547	6.566	6.10579	6.57945
S'MARCD2	0.004827	9.08502	8.65691	9.05326	8.79832
GNPTAB	0.004827	8.50369	9.48258	8.29688	9.71069
NRGN	0.004827	6.8183	5.19319	6.8111	5.00342
ZNF629	0.004827	7.95659	6.94579	8.04229	6.73939
SUGT1P3	0.004827	3.38501	3.73546	3.45432	3.62855
UBASH3B	0.004827	9.44483	7.61534	10.164	7.546
SESN3	0.004827	5.21472	4.35011	4.89896	4.47745
PLEC	0.004827	4.5927	5.06549	4.60472	4.99062
PLXNC1	0.004827	7.00683	5.63592	7.08519	5.45353
MOB1A	0.004827	10.6761	10.1088	10.6398	10.0982
NUDT22	0.004827	9.11459	8.59866	9.10789	8.4978
HVCN1	0.004827	8.58231	7.40959	8.17045	7.43925
PHF11	0.004827	11.3029	10.3908	11.2491	10.328
'SEPT11	0.004827	9.35618	7.3555	9.263	7.22739
LETM2	0.004827	5.0519	5.50029	5.12605	5.49857
TPD52L2	0.004827	9.30544	8.79247	9.42572	8.80945
ZNF304	0.004827	7.04529	7.56494	7.03926	7.67196
ZMYND12	0.004827	4.80781	4.22915	4.80167	4.19335
TRIAP1	0.004827	10.7812	10.2979	10.6949	10.3879
NAPB	0.004827	7.01666	7.66264	6.99779	7.66281
DMXL2	0.004827	8.46161	9.43145	8.39561	9.47659
TCEAL8	0.004827	8.06896	9.31219	8.23374	9.39804
LOC100499489	0.004827	5.02789	4.70962	4.92092	4.6493
NADK2	0.004827	8.48109	7.73764	8.51164	7.68041
LOC100507239	0.004827	7.62897	8.06911	7.74558	8.03084
L3MBTL4	0.004827	6.09417	4.30935	6.71399	4.26353
SP2	0.004827	8.27601	8.60345	8.29744	8.63856
TMEM86B	0.004827	5.23091	5.82752	5.3093	5.74499
TIAM2	0.004827	6.64212	5.21793	5.82756	5.11839
ACYP1	0.004827	9.54464	10.29	9.45003	10.2624
JMJD1CAS1	0.004827	5.13878	4.57279	4.83941	4.5086
PHC3	0.004827	7.40073	7.86706	7.31443	7.91202
RCBTB1	0.004827	9.85701	8.50912	10.046	8.46803
NRIP1	0.004827	11.1343	9.12928	12.1849	9.57772
[truncated: 16,540 more rows]
