# Supplementary material for: SAMHD1 is a key regulator of the lineage-specific response of acute lymphoblastic leukaemias to nelarabine
Source: Commun Biol. 2020 Jun 24;3:324. doi: 10.1038/s42003-020-1052-8 (PMC7314829; doi:10.1038/s42003-020-1052-8)
Supplement: Supplementary file 6 — Supplementary Data 5 [file 42003_2020_1052_MOESM6_ESM.xlsx]

## Sheet: Sheet1
Suppl. Data 5. Data underlying graphs.

## Sheet: Figure 3B
Figure 3B
Western blot quantification
B-ALL		Membrane 1						Membrane 2						Membrane 3						N=3
		GAPDH	SAMHD1	SAMHD1/GAPDH	THP-1=1			GAPDH	SAMHD1	SAMHD1/GAPDH	THP-1=1			GAPDH	SAMHD1	SAMHD1/GAPDH	THP-1=1				Mean	SD
	697	373940	1904.64	0.00509344	0.00935475		697	167450	11435	0.068289	0.035632		697	512453	1729.55	0.00337503	0.00744059			697	0.0174758	0.0128622
	BALL-1	389502	16132	0.041417	0.0760677		BALL-1	153902	77284	0.502164	0.26202		BALL-1	442666	26222.5	0.0592378	0.130595			BALL-1	0.156228	0.0780485
	GRANTA-452	309708	7123.59	0.023001	0.0422442		GRANTA-452	191568	37810	0.197371	0.102985		GRANTA-452	341181	11224.3	0.0328983	0.0725276			GRANTA-452	0.0725855	0.0247973
	HAL-01	264531	19016	0.0718857	0.132027		HAL-01	166934	92173	0.552152	0.288103		HAL-01	282512	33882.2	0.119932	0.264401			HAL-01	0.228177	0.0686734
	KARPAS231	443716	28417.6	0.0640447	0.117626		KARPAS231	140315	125884	0.897153	0.468119		KARPAS231	525434	47044.6	0.0895347	0.197388			KARPAS231	0.261044	0.150001
	MHH-CALL-4	489567	13518.8	0.0276137	0.0507161		MHH-CALL-4	179947	60735	0.337516	0.17611		MHH-CALL-4	535930	23144	0.0431847	0.0952048			MHH-CALL-4	0.107344	0.0519064
	MN-60	413608	66930.1	0.16182	0.297203		MN-60	131118	217613	1.65967	0.865988		MN-60	459608	84374	0.183578	0.404716			MN-60	0.522636	0.246722
	NALM-6	387202	2987.8	0.00771637	0.0141721		NALM-6	133855	16637	0.124291	0.064853		NALM-6	358165	4240.84	0.0118405	0.0261034			NALM-6	0.0350428	0.0216344
	THP-1	295449	160865	0.544476	1		THP-1	259030	496433	1.91651	1		THP-1	395111	179222	0.453598	1
	NALM-16	312002	15105.5	0.0484149	0.0499897		NALM-16	284689	28226	0.0991468	0.0808476		NALM-16	424037	14204	0.0334971	0.0652252			NALM-16	0.0653542	0.012598
	REH	320119	3394.86	0.010605	0.01095		REH	202248	13943	0.0689401	0.0562161		REH	439510	4559	0.0103729	0.020198			REH	0.0291214	0.0195273
	ROS-50	299384	161672	0.540015	0.557581		ROS-50	183431	295978	1.61357	1.31576		ROS-50	382225	158948	0.415849	0.809738			ROS-50	0.894358	0.315254
	RS4;11	296573	61389.8	0.206997	0.21373		RS4;11	187226	126044	0.673218	0.548965		RS4;11	396621	65501	0.165148	0.321574			RS4;11	0.361423	0.139729
	SEM	371803	53906.8	0.144987	0.149704		SEM	180910	128936	0.712708	0.581166		SEM	456020	56483	0.123861	0.241181			SEM	0.324017	0.185627
	TANOUE	455163	20968.9	0.0460689	0.0475675		TANOUE	235444	51788	0.219959	0.179362		TANOUE	523550	25359	0.0484366	0.0943153			TANOUE	0.107082	0.0545568
	TOM-1	275232	795.016	0.00288853	0.00298249		TOM-1	168884	1120	0.00663177	0.00540777		TOM-1	416439	423	0.00101576	0.00197787			TOM-1	0.00345604	0.00143973
	THP-1	260536	252328	0.968496	1		THP-1	345663	423901	1.22634	1		THP-1	424211	217858	0.51356	1			THP-1	1	0
T-ALL		Membrane 1						Membrane 2						Membrane 3						N=3
		GAPDH	SAMHD1	SAMHD1/ GAPDH	THP=1			GAPDH	SAMHD1	SAMHD1/ GAPDH	THP=1			GAPDH	SAMHD1	SAMHD1/ GAPDH	THP=1				Mean	SD
	ALL-SIL	492824	14301.1	0.0290186	0.0526763		ALL-SIL	615637	3446.38	0.00559806	0.00880514		ALL-SIL	565783	3610	0.00638054	0.0128555			ALL-SIL	0.024779	0.0197956
	CCRF-CEM	617536	10578.7	0.0171305	0.0310963		CCRF-CEM	722790	457.984	0.000633634	0.000996638		CCRF-CEM	638877	1177	0.0018423	0.00371184			CCRF-CEM	0.0119349	0.0135944
	CTV-1	476415	9779.81	0.0205279	0.0372634		CTV-1	540037	399.375	0.000739533	0.00116321		CTV-1	470207	633	0.00134622	0.00271234			CTV-1	0.013713	0.0166647
	HSB-2	516253	10581.6	0.020497	0.0372073		HSB-2	623862	1130.52	0.00181212	0.00285027		HSB-2	585604	925	0.00157957	0.0031825			HSB-2	0.0144134	0.0161183
	JJHan	568724	10088.3	0.0177385	0.0321998		JJHan	664516	1550.34	0.00233304	0.00366962		JJHan	643365	1531	0.00237968	0.00479455			JJHan	0.0135547	0.0131921
	Jurkat	526599	8721.48	0.0165619	0.0300641		Jurkat	661487	350.219	0.000529441	0.000832754		Jurkat	605249	492	0.000812889	0.0016378			Jurkat	0.0108449	0.013594
	KE-37	466760	10820.1	0.0231812	0.0420798		KE-37	590100	626.484	0.00106166	0.00166987		KE-37	518393	1705	0.00328901	0.00662667			KE-37	0.0167921	0.0179952
	MOLT-4	491906	10233.9	0.0208046	0.0377656		MOLT-4	615396	388.078	0.000630615	0.00099189		MOLT-4	537438	515	0.00095825	0.00193067			MOLT-4	0.0135627	0.0171183
	MOLT-16	462577	67719.6	0.146396	0.265747		MOLT-16	589457	55593.9	0.0943137	0.148345		MOLT-16	489394	62740	0.128199	0.258295			MOLT-16	0.224129	0.0536735
	P12-ICHIKAWA	298441	9829.03	0.0329345	0.0597846		P12-ICHIKAWA	331673	350.656	0.00105724	0.00166292		P12-ICHIKAWA	318834	320	0.00100366	0.00202216			P12-ICHIKAWA	0.0211566	0.0273145
	RPMI-8402	533629	11354.2	0.0212773	0.0386238		RPMI-8402	596603	251.734	0.000421946	0.000663676		RPMI-8402	620194	821	0.00132378	0.00266714			RPMI-8402	0.0139849	0.0174415
	THP-1	401015	220914	0.550887	1		THP-1	394868	251046	0.635772	1		THP-1	417229	207083	0.496329	1			THP-1	1	0
AML		Membrane 1						Membrane 2						Membrane 3						N=3
		GAPDH	SAMHD1	SAMHD1/ GAPDH	THP=1			GAPDH	SAMHD1	SAMHD1/ GAPDH	THP=1			GAPDH	SAMHD1	SAMHD1/ GAPDH	THP=1				Mean	SD
	HEL	8888	185	0.0208146	0.0115653		HEL	7186	0	0	0		HEL	7864	82	0.0104273	0.00614114			HEL	0.00590213	0.00472452
	HL-60	7527	96	0.0127541	0.00708658		HL-60	4905	366	0.0746177	0.0468137		HL-60	6446	0	0	0			HL-60	0.0179668	0.020602
	KG-1	8886	201	0.0226199	0.0125683		KG-1	5526	65	0.0117626	0.00737961		KG-1	7880	411	0.0521574	0.0307181			KG-1	0.0168887	0.0100057
	ML-2	11603	2356	0.203051	0.112822		ML-2	7803	1930	0.247341	0.155177		ML-2	10909	2246	0.205885	0.121256			ML-2	0.129752	0.0183051
	MOLM-13	5556	988	0.177826	0.0988058		MOLM-13	3710	851	0.22938	0.143909		MOLM-13	4809	891	0.185278	0.109119			MOLM-13	0.117278	0.0192957
	MONO-MAC-6	4910	7806	1.58982	0.883354		MONO-MAC-6	4491	9046	2.01425	1.2637		MONO-MAC-6	4055	10352	2.5529	1.50353			MONO-MAC-6	1.21686	0.255343
	MV4-11	5459	6807	1.24693	0.692836		MV4-11	4838	7086	1.46465	0.918896		MV4-11	4376	7336	1.67642	0.987327			MV4-11	0.866353	0.125836
	NB-4	9076	870	0.0958572	0.0532614		NB-4	8117	1209	0.148947	0.0934462		NB-4	7353	864	0.117503	0.0692035			NB-4	0.0719704	0.0165216
	OCI-AML2	6627	6027	0.909461	0.505326		OCI-AML2	7464	5765	0.772374	0.484572		OCI-AML2	5894	6574	1.11537	0.656899			OCI-AML2	0.548933	0.0768125
	OCI-AML3	9482	8325	0.877979	0.487834		OCI-AML3	9414	10085	1.07128	0.672098		OCI-AML3	10759	9129	0.848499	0.499724			OCI-AML3	0.553219	0.0842006
	PL-21	3447	0	0	0		PL-21	4091	0	0	0		PL-21	4551	0	0	0			PL-21	0	0
	SIG-M5	6506	2659	0.4087	0.227087		SIG-M5	5270	2448	0.464516	0.291428		SIG-M5	5708	2991	0.524001	0.308611			SIG-M5	0.275709	0.0350892
	THP-1	5623	10120	1.79975	1		THP-1	5238	8349	1.59393	1		THP-1	5181	8797	1.69793	1			THP-1	1	0
qPCR
	B-ALL	2^ -ΔΔ Ct				2^ -ΔΔ Ct
		EXPRESSION				Mean	SD
		N1	N2	N3
1	697	0.0134712	0.0118445	0.0107629		0.0120262	0.00111311
2	BALL-1	0.295045	0.301962	0.159124		0.252044	0.0657648
3	GRANTA-452	0.703982	0.723263	1.77299		1.06674	0.49945
4	HAL-01	0.346261	0.373794	0.286753		0.335603	0.0363246
5	KARPAS 231	0.478939	0.594221	0.623905		0.565688	0.0625267
6	MHH-CALL-4	0.266447	0.296416	0.257746		0.273536	0.0165637
7	MN-60	0.341784	0.346724	0.33417		0.340893	0.00516377
8	NALM6	0.114982	0.101924	0.0899712		0.102292	0.0102139
9	NALM16	0.621591	0.658672	1.36222		0.880828	0.340733
10	REH	0.118146	0.13545	0.101882		0.118493	0.0137062
11	ROS50	1	1	1		1	0
12	RS4-11	0.789489	0.817667	0.64811		0.751755	0.0741859
13	SEM	0.348792	0.338838	0.281307		0.322979	0.0297453
14	TANOUE	0.126078	0.145617	0.125977		0.132557	0.00923481
15	TOM-1	0.0201508	0.0219995	0.0174907		0.0198803	0.00185063
	T-ALL	2^ -ΔΔ Ct				2^ -ΔΔ Ct
		EXPRESSION				Mean	SD
		N1	N2	N3
16	ALL-SIL	0.0314179	0.0254326	0.0220323		0.0262943	0.0038798
17	CCRF-CEM	0	0	0		0	0
18	CTV-1	0.00423752	0.00399127	0.00384528		0.00402469	0.000161868
19	HSB-2	0.00179651	0.00269654	0.00216857		0.00222054	0.000369268
20	J-J-HAN	0.00316232	0.00357979	0.00200316		0.00291509	0.000666973
21	Jurkat	0.000176492	0.000239255	0.000165887		0.000193878	3.23773e-05
22	Ke37	0.00122415	0.00131045	0.000963546		0.00116605	0.000147463
23	Molt4	0.00202793	0.00109972	0.00164555		0.00159107	0.000380893
24	Molt16	1.28157	0.52228	0.366531		0.723461	0.399733
25	P12-Ichikawa	0.00151819	0.00208718	0.00144474		0.00168337	0.000287106
26	RPMI-8402	0.00108215	0.000881363	0.00106838		0.00101063	9.15778e-05

## Sheet: Figure 4
Figure 4
B-ALL		IC50 AraC [ng/ml]			Mean	SD		IC50 AraG [µg/ml]			Mean	SD
	697	1.1698	1.29	1.22	1.2266	0.0492929		0.254916	0.279841	0.282107	0.272288	0.0123187
	BALL-1	2.7	2.7224	2.81	2.74413	0.047464		5.39402	4.71595	4.16363	4.75787	0.50318
	GRANTA-452	3.2338	3.25	3.78	3.42127	0.253749		7.04418	7.32459	5.71295	6.69391	0.703022
	HAL-01	0.94	1.04	0.96	0.98	0.0432049		2.54916	1.46293	2.43586	2.14932	0.487546
	KARPAS231	10.86	11.21	12.65	11.5733	0.774611		29.3437	27.7054	23.1407	26.7299	2.62461
	MHH-CALL-4	22.9	28.183	30.114	27.0657	3.04924		34.5836	28.5959	30.4766	31.2187	2.50015
	MN-60	15.09	13.67	16.08	14.9467	0.989085		97.0692	101.029	99.2105	99.1028	1.61833
	NALM-6	2.1403	2.27	2.17	2.19343	0.0554819		2.86072	3.39491	3.50651	3.25405	0.28183
	NALM-16	8.507	8.48	9.39	8.79233	0.422758		68.6574	62.0211	64.8959	65.1915	2.71731
	REH	1.09	1.36	1.49	1.31333	0.1666		1.57241	1.41337	1.46435	1.48338	0.0663064
	ROS-50	23.3	16.28	15.27	18.2833	3.5712		88.538	102.592	80.7234	90.6179	9.04829
	RS4;11	3.1	7.44	6.68	5.74	1.89237		16.1475	14.9551	18.1585	16.4204	1.32196
	SEM	23.3	31.054	27.7	27.3513	3.17514		36.1131	30.876	39.9368	35.642	3.71405
	TANOUE	27.4	28.5	27.11	27.67	0.598721		46.7346	47.3861	53.2944	49.1384	2.9508
	TOM-1	1.4	1.4	1.33	1.37667	0.0329983		0.084972	0.113296	0.103099	0.100456	0.0117133
T-ALL		IC50 AraC [ng/ml]			Mean	SD		IC50 AraG [µg/ml]			Mean	SD
	ALL-SIL	6.0228	4.4969	4.9916	5.17043	0.635651		1.50154	1.16978	1.16412	1.27848	0.157745
	CCRF-CEM	2.9	4.2602	4.479	3.87973	0.698511		0.417892	0.458849	0.410698	0.429146	0.0212072
	CTV-1	1.7357	1.7052	1.73	1.72363	0.0132404		0.481508	0.350849	0.312385	0.381581	0.0723829
	HSB-2	3.5328	3.42	3.59	3.51427	0.0706287		0.538156	0.453042	0.57781	0.523003	0.0520508
	JJHan	5.4	6.3344	5.0812	5.6052	0.531794		0.84972	1.23133	0.826891	0.969313	0.185507
	Jurkat	7.3875	6.3352	6.231	6.65123	0.522354		0.918689	1.04482	0.917698	0.960401	0.0596918
	KE-37	2.0601	1.9439	1.48	1.828	0.250604		0.169944	0.406251	0.385008	0.320401	0.106742
	MOLT-4	2.9993	2.91	3.16	3.0231	0.10344		0.453184	0.465647	0.467006	0.461946	0.00622017
	MOLT-16	6.8575	5.7323	6.85	6.47993	0.528665		13.7655	16.8389	16.0594	15.5546	1.30452
	P12-ICHIKAWA	2.2744	2.2237	1.8518	2.11663	0.188406		0.275961	0.251262	0.249704	0.258976	0.012027
	RPMI-8402	3.35	3.22	3.71	3.42667	0.207257		0.42486	0.44582	0.434773	0.435151	0.00856095

## Sheet: Figure 5A
Figure 5A
IC50 values
	MHH-CALL-4			SEM			TANOUE
	untreated	Vpr	Vpx	untreated	Vpr	Vpx	untreated	Vpr	Vpx
AraC	23.848	22.694	4.5671	21.568	24.341	3.1108	9.6874	17.791	2.7172
[ng/ml]	19.551	25.438	4.8816	27.398	21.743	3.2972	14.017	28.597	4.432
	24.46	22.287	4.3561	23.892	19.427	3.2531	11.475	13.576	1.9225
Mean	22.6197	23.473	4.6016	24.286	21.837	3.22037	11.7265	19.988	3.0239
SD	2.18421	1.39936	0.215917	2.39634	2.00723	0.0795397	1.77647	6.32602	1.0472
AraG	35.6429	38.43	0.680994	42.3415	34.4448	0.84448	19.5597	68.5299	0.486493
[µg/ml]	34.9688	43.619	0.592283	35.4248	37.348	1.15941	24.1924	39.6621	0.417496
	41.996	38.92	0.837739	36.5946	40.7526	1.03207	29.0434	13.1599	0.163175
Mean	37.5359	40.323	0.703672	38.1203	37.5151	1.01199	24.2652	40.4506	0.355721
SD	3.16574	2.33917	0.101482	3.02282	2.57784	0.129353	3.87206	22.6116	0.139034
Dose-response-curves
			AraG [µg/ml]
		Cell Viability [%]	226.592	56.648	14.162	3.5405	0.885125	0.221281	0.0553203	0.0138301
MHH-CALL-4	untreated	Value 1	14.6714	37.0866	74.1314	84.3658	88.175	95.856	92.5701	99.2675
		Value 2	13.4295	32.1767	80.1712	90.2434	88.9139	93.9162	88.9139	100
		Value 3	14.389	42.1053	76.056	87.0115	88.5701	96.1148	93.2008	98.08
		Mean	14.1633	37.1229	76.7862	87.2069	88.553	95.2956	91.5616	99.1158
		SD	0.531541	4.05342	2.51923	2.40346	0.301921	0.981133	1.88982	0.791154
	Vpr	Value 1	17.2056	37.6446	78.5697	93.7928	92.5419	93.2027	97.8759	97.0734
		Value 2	20.3499	37.1752	90.5325	95.858	100	100	100	100
		Value 3	21.069	37.0592	80.6387	82.1468	96.4959	92.4373	96.6511	93.3245
		Mean	19.5415	37.293	83.247	90.5992	96.3459	95.2134	98.1757	96.7993
		SD	1.67762	0.253066	5.22044	6.03591	3.04661	3.39906	1.3835	2.73216
	Vpx	Value 1	10.2785	20.1013	20.0506	31.0127	44.2278	72.9873	89.7215	95.4177
		Value 2	7.70128	18.0163	25.9277	27.6313	44.7608	62.6138	79.7666	89.5216
		Value 3	14.2787	18.0079	23.4789	26.3494	48.6752	78.2139	94.6271	90.7998
		Mean	10.7528	18.7085	23.1524	28.3311	45.8879	71.2717	88.0384	91.913
		SD	2.70609	0.984851	2.41037	1.96705	1.98285	6.48326	6.18239	2.53253
			AraG [µg/ml]
		Cell Viability [%]	226.592	56.648	14.162	3.5405	0.885125	0.221281	0.0553203	0.0138301
SEM	untreated	Value 1	6.48031	43.6785	72.2363	94.5044	100	97.5858	97.6811	101.048
		Value 2	5.82889	40.0188	68.7872	85.8978	99.718	90.1598	95.926	99.718
		Value 3	6.1086	39.3342	71.9457	89.8837	92.7602	93.5682	94.6671	95.055
		Mean	6.13927	41.0105	70.9898	90.0953	97.4927	93.7713	96.0914	98.6071
		SD	0.26682	1.90716	1.56194	3.51682	3.34838	3.03503	1.23599	2.56977
	Vpr	Value 1	6.1231	39.1815	68.6866	81.1865	89.2132	87.0876	95.1142	96.066
		Value 2	4.30976	39.9663	72.0539	85.9933	91.7172	91.9529	92.4579	95.6566
		Value 3	7.62317	42.4767	72.5699	87.4168	93.4421	96.8708	95.972	100
		Mean	6.01868	40.5415	71.1034	84.8655	91.4575	91.9704	94.5147	97.2409
		SD	1.35471	1.40541	1.72194	2.66556	1.73617	3.99403	1.49595	1.95816
	Vpx	Value 1	0	2.11893	9.91114	26.9993	49.0089	75.5639	84.689	88.2092
		Value 2	0	0.735293	12.9412	31.3971	54.7059	74.4853	90.9926	95.5515
		Value 3	0	1.68501	11.1761	29.7111	52.6823	73.0055	85.6259	90.9216
		Mean	0	1.51308	11.3428	29.3692	52.1323	74.3516	87.1025	91.5607
		SD	0	0.577804	1.24261	1.81158	2.35807	1.04874	2.77721	3.03136
			AraG [µg/ml]
		Cell Viability [%]	226.592	56.648	14.162	3.5405	0.885125	0.221281	0.0553203	0.0138301
TANOUE	untreated	Value 1	17.294	32.8373	55.4145	63.6364	78.1481	87.5141	80.6365	100
		Value 2	21.7788	32.8725	61.046	85.0109	99.9728	100	100	100
		Value 3	20.3232	35.0306	66.0246	83.2411	100	100	100	100
		Mean	19.7987	33.5802	60.8284	77.2961	92.7069	95.838	93.5455	100
		SD	1.86811	1.02574	4.33429	9.68589	10.2947	5.88592	9.12805	0
	Vpr	Value 1	30.3633	53.2966	73.8314	100	100	100	100	100
		Value 2	22.0164	43.5697	79.0931	100	100	100	100	100
		Value 3	20.2744	32.9816	48.3519	76.5162	86.9886	100	100	100
		Mean	24.218	43.2826	67.0921	92.1721	95.6629	100	100	100
		SD	4.40319	8.29606	13.4243	11.0704	6.13361	0	0	0
	Vpx	Value 1	26.8624	32.9053	42.9799	42.4983	43.9996	57.8699	65.9617	86.9323
		Value 2	18.4697	31.1558	36.1996	32.1844	44.6179	54.552	72.2999	89.1546
		Value 3	18.5446	26.3938	27.6135	29.8119	29.3364	47.4881	58.8312	82.31
		Mean	21.2922	30.1516	35.5977	34.8315	39.318	53.3033	65.6976	86.1323
		SD	3.93884	2.75152	6.28771	5.50709	7.06256	4.32934	5.50174	2.85098
			AraC [ng/ml]
		Cell Viability [%]	5000	1250	312.5	78.125	19.5312	4.88281	1.2207	0.305176
MHH-CALL-4	untreated	Value 1	15.3621	13.5412	17.5806	22.0176	55.2951	94.4747	79.6149	95.7514
		Value 2	14.0988	17.77	14.7042	16.4812	50.0293	81.0974	94.5128	95.9188
		Value 3	14.2307	17.4192	17.0982	15.7929	58.0355	80.4836	91.376	91.9752
		Mean	14.5639	16.2435	16.461	18.0972	54.4533	85.3519	88.5012	94.5484
		SD	0.566988	1.91613	1.25778	2.78634	3.32229	6.45563	6.41275	1.82085
	Vpr	Value 1	16.3882	16.2966	15.198	19.4095	54.3145	72.8542	93.7285	99.176
		Value 2	17.1133	18.8293	21.4622	12.4589	61.2835	84.3206	94.1232	94.8989
		Value 3	16.6895	19.4521	20.6621	18.8128	53.8356	82.3288	97.968	93.2192
		Mean	16.7303	18.1927	19.1074	16.8937	56.4779	79.8345	95.2733	95.7647
		SD	0.297432	1.36459	2.78361	3.14536	3.40371	5.00238	1.9123	2.50774
	Vpx	Value 1	14.3121	14.1507	20.3273	15.9484	24.7522	47.4764	87.9926	98.0641
		Value 2	11.7173	15.4326	20.9925	25.9548	30.2416	49.935	100	98.9867
		Value 3	13.2957	15.1857	24.1147	19.1397	21.1601	44.6013	91.8097	97.2192
		Mean	13.1084	14.923	21.8115	20.3476	25.3847	47.3376	93.2674	98.09
		SD	1.06754	0.555312	1.65111	4.17344	3.73438	2.17968	5.00919	0.72183
			AraC [ng/ml]
		Cell Viability [%]	200	50	12.5	3.125	0.78125	0.195312	0.0488281	0.012207
SEM	untreated	Value 1	0	31.9427	62.0312	79.941	88.7906	90.6448	98.7779	96.4602
		Value 2	0.191351	35.132	69.0011	90.1263	100	100	100	100
		Value 3	0	30.4189	67.3851	87.6372	96.95	98.17	100	100
		Mean	0.0637838	32.4979	66.1391	85.9015	95.2469	96.2716	99.5926	98.8201
		SD	0.0902039	1.96378	2.97875	4.33548	4.73204	4.0483	0.57609	1.66869
	Vpr	Value 1	0.900564	27.4296	71.1069	92.4953	100	100	100	100
		Value 2	0	28.3941	64.9116	94.6596	100	100	100	100
		Value 3	1.5449	25.169	62.4397	78.1139	84.3901	89.411	87.5443	100
		Mean	0.815154	26.9976	66.1527	88.423	94.7967	96.4703	95.8481	100
		SD	0.633587	1.35165	3.64561	7.34294	7.35858	4.9917	5.8717	0
	Vpx	Value 1	0	0	13.0154	49.7979	91.9159	100	100	100
		Value 2	0	0	14.6808	51.769	95.9333	100	100	100
		Value 3	0	0.564973	13.7476	51.3748	86.855	93.823	100	100
		Mean	0	0.188324	13.8146	50.9806	91.5681	97.941	100	100
		SD	0	0.266331	0.681544	0.851616	3.71436	2.91187	0	0
			AraC [ng/ml]
		Cell Viability [%]	2000	500	125	31.25	7.8125	1.95312	0.488281	0.12207
TANOUE	untreated	Value 1	15.2325	21.1236	19.6983	25.7794	54.8429	90.5754	84.6547	100
		Value 2	22.4761	21.7042	26.5514	32.9114	62.7045	100	100	100
		Value 3	14.1283	15.3137	19.3983	27.664	59.1161	82.4443	95.2455	100
		Mean	17.279	19.3805	21.8827	28.7849	58.8879	91.0066	93.3	100
		SD	3.70245	2.8854	3.30357	3.01757	3.21355	7.17358	6.41396	0
	Vpr	Value 1	20.8348	29.9148	31.7632	39.983	64.4208	100	100	100
		Value 2	26.0701	20.806	31.2737	47.7994	78.3828	100	100	100
		Value 3	25.168	23.2263	25.6161	31.8419	62.0884	100	100	100
		Mean	24.0243	24.649	29.551	39.8748	68.2973	100	100	100
		SD	2.28521	3.85234	2.78955	6.51507	7.1948	0	0	0
	Vpx	Value 1	19.1809	25.7732	30.1239	42.7504	38.3619	53.7028	100	100
		Value 2	17.9274	25.5356	26.69	32.3043	36.6069	68.8588	100	100
		Value 3	18.1204	19.4907	19.0161	28.581	30.6597	49.355	90.5087	94.4055
		Mean	18.4096	23.5998	25.2767	34.5452	35.2095	57.3055	96.8362	98.1352
		SD	0.551079	2.90723	4.64355	5.99774	3.29599	8.35998	4.47426	2.63729

## Sheet: Figure 5B
Figure 5B
IC50 values
	THP-1			HEL			Jurkat
	parental	SAMHD1_CTRL	SAMHD1_KO	parental	SAMHD1 wt	SAMHD1 D311A	parental	SAMHD1 wt	SAMHD1 D311A
AraC	686.04	683.81	12.501	9.0913	981.79	13.128	8.2812	130.64	10.616
[ng/ml]	700.27	668.96	11.049	7.512	776.78	14.526	10.643	84.469	6.9047
	629.69	475.16	7.0771	7.679	1762.3	14.992	7.876	74.292	10.658
Mean	672	609.31	10.209	8.0941	1173.62	14.2153	8.9334	96.467	9.3929
SD	30.4765	95.0519	2.29257	0.708415	424.588	0.792048	1.22014	24.5185	1.75951
AraG	135.15	106.4	15.665	33.369	119.39	28.284	0.485077	76.5541	0.533143
[µg/ml]	89.096	88.665	11.381	32.974	146.13	26.253	0.628085	78.888	0.766164
	85.749	60.402	18.935	20.277	149.8	15.208	0.467091	56.7641	0.870397
Mean	103.332	85.1557	15.327	28.8733	138.44	23.2483	0.526751	70.7354	0.723234
SD	22.5404	18.9419	3.09316	6.08066	13.5535	5.74552	0.0720291	9.92503	0.14099
Dose-response-curves
			AraG [µg/ml]
		Cell Viability [%]	200	100	50	25	12.5	6.25	3.125	1.5625
THP-1	par	Value 1	42.0822	56.1096	73.2603	93.4795	86.137	98.4658	100	100
		Value 2	44.1055	45.9152	69.3899	78.0765	78.2834	90.0724	90.5377	91.9855
		Value 3	28.6814	44.9205	67.1626	78.2966	87.4038	89.4048	86.8138	88.1991
		Mean	38.2897	48.9818	69.9376	83.2842	83.9414	92.6477	92.4505	93.3949
		SD	6.84413	5.05648	2.5193	7.20971	4.03412	4.12303	5.55057	4.9197
	SAMHD1 Ctrl	Value 1	37.7461	51.2303	71.3583	100	100	100	100	100
		Value 2	28.7078	47.2366	62.8628	94.2346	100	100	100	100
		Value 3	32.6316	37.0301	54.9624	83.4586	87.218	89.6992	84.4737	93.1955
		Mean	33.0285	45.1657	63.0612	92.5644	95.7393	96.5664	94.8246	97.7318
		SD	3.70053	5.97931	6.69505	6.85547	6.02547	4.85582	7.31917	3.20768
	SAMHD1 KO	Value 1	3.59712	10.0407	22.0206	39.6622	55.0516	71.7548	86.5499	100
		Value 2	2.81606	9.46675	24.0563	41.5818	47.3337	66.447	83.7927	100
		Value 3	1.22204	6.33803	23.3223	42.3571	61.309	69.3455	84.507	96.8931
		Mean	2.54507	8.61515	23.1331	41.2004	54.5648	69.1824	84.9499	98.9644
		SD	0.988376	1.62712	0.841761	1.13276	5.71577	2.16997	1.16837	1.46459
			AraG [µg/ml]
		Cell Viability [%]	200	100	50	25	12.5	6.25	3.125	1.5625
HEL	par	Value 1	13.115	25.623	41.7572	55.9105	61.3419	69.3131	82.2204	88.7859
		Value 2	18.082	32.9388	45.8055	52.7878	72.328	68.9827	90.1698	88.9861
		Value 3	1.63865	25.3361	21.8697	43.5924	64.4748	74.3067	90.3571	93.6134
		Mean	10.9452	27.966	36.4775	50.7636	66.0482	70.8675	87.5825	90.4618
		SD	6.88607	3.51824	10.4606	5.22857	4.62102	2.43564	3.7923	2.23003
	SAMHD1 WT	Value 1	22.6719	60.3852	70.9654	96.0995	79.5709	90.1024	68.0156	86.8844
		Value 2	35.5345	67.272	79.3232	89.5997	97.2142	97.2142	94.3665	100
		Value 3	39.1414	64.9634	77.5288	96.8586	98.1571	99.9791	100	100
		Mean	32.4492	64.2068	75.9391	94.1859	91.6474	95.7652	87.4607	95.6281
		SD	7.06871	2.86196	3.59244	3.25775	8.54802	4.16027	13.9408	6.18273
	SAMHD1 D311A	Value 1	0	17.7093	34.9134	53.3686	60.924	85.0818	75.9625	100
		Value 2	2.3532	17.572	34.4623	51.2206	59.7977	82.6699	78.0075	97.7788
		Value 3	2.31969	10.4483	19.5906	41.8519	53.2359	67.2125	78.499	84.1325
		Mean	1.55763	15.2432	29.6554	48.8137	57.9858	78.3214	77.4897	93.9704
		SD	1.1015	3.39096	7.11926	5.00026	3.39006	7.91666	1.09837	7.01529
			AraG [µg/ml]
		Cell Viability [%]	226.592	56.648	14.162	3.5405	0.885125	0.221281	0.0553203	0.0138301
Jurkat	par	Value 1	0	0	2.54018	7.87898	29.127	76.1361	96.3442	100
		Value 2	0	0	2.05351	8.6087	31.3043	91.6054	100	100
		Value 3	0	0	2.71799	11.8993	30.7432	72.0983	100	100
		Mean	0	0	2.43723	9.46234	30.3915	79.9466	98.7814	100
		SD	0	0	0.280871	1.74878	0.923027	8.40717	1.72338	0
	SAMHD1 WT	Value 1	26.5948	56.9988	100	100	100	100	100	100
		Value 2	24.8732	58.5904	100	100	100	100	100	100
		Value 3	20.9801	50.0492	94.8104	100	100	100	100	100
		Mean	24.1494	55.2128	98.2701	100	100	100	100	100
		SD	2.34867	3.70858	2.4464	0	0	0	0	0
	SAMHD1 D311A	Value 1	0	2.91496	8.45266	16.8542	39.2095	68.1473	93.761	86.9448
		Value 2	0	2.78184	7.45242	13.2796	41.5666	94.9341	100	100
		Value 3	0	2.29001	7.80423	20.668	45.7755	100	100	100
		Mean	0	2.66227	7.9031	16.9339	42.1839	87.6938	97.9203	95.6483
		SD	0	0.268779	0.414289	3.0168	2.71583	13.9753	2.94111	6.15429
			AraC [ng/ml]
		Cell Viability [%]	8000	2000	500	125	31.25	7.8125	1.95312	0.488281
THP-1	par	Value 1	1.71507	15.0469	62.52	84.1985	93.0711	93.2998	94.1002	100
		Value 2	1.55654	23.8517	59.2095	82.1303	93.8349	100	100	100
		Value 3	2.91575	21.4505	56.4396	78.5641	95.956	100	100	100
		Mean	2.06245	20.1164	59.3897	81.631	94.2873	97.7666	98.0334	100
		SD	0.606835	3.71628	2.4856	2.32717	1.22045	3.15851	2.78121	0
	SAMHD1 Ctrl	Value 1	1.20328	22.0942	59.0886	82.0021	100	100	100	100
		Value 2	0	23.3918	57.8185	72.7689	100	100	100	100
		Value 3	0.968989	19.2076	48.708	79.4574	97.8036	100	100	100
		Mean	0.724089	21.5645	55.205	78.0761	99.2679	100	100	100
		SD	0.520866	1.74878	4.62325	3.89391	1.03538	0	0	0
	SAMHD1 KO	Value 1	0	0	0	6.309	29.6569	60.9026	84.5959	100
		Value 2	0	0	0	6.97674	32.2351	56.1585	73.1697	100
		Value 3	0	0	0	0	26.198	46.1474	88.1782	100
		Mean	0	0	0	4.42858	29.3634	54.4028	81.9813	100
		SD	0	0	0	3.14332	2.47337	6.1504	6.40005	0
			AraC [ng/ml]
		Cell Viability [%]	8000	2000	500	125	31.25	7.8125	1.95312	0.488281
HEL	par	Value 1	0	0	0	0	20.4456	54.1601	85.5875	100
		Value 2	0	0	0	0	23.1126	49.1408	76.5206	100
		Value 3	0	0	0	0	10.3072	49.2567	91.3115	100
		Mean	0	0	0	0	17.9551	50.8525	84.4732	100
		SD	0	0	0	0	5.5164	2.33929	6.08958	0
	SAMHD1 WT	Value 1	1.24933	35.9383	63.3705	78.6018	100	95.5077	100	88.5167
		Value 2	3.87403	29.0927	60.2349	76.181	91.6271	85.1037	95.801	91.2022
		Value 3	15.6024	45.0602	87.8113	92.1486	100	97.0884	100	100
		Mean	6.90859	36.6971	70.4722	82.3105	97.209	92.5666	98.6003	93.2396
		SD	6.24014	6.54076	12.3272	7.02647	3.94702	5.31636	1.97941	4.9044
	SAMHD1 D311A	Value 1	0	0	0	6.72666	26.6817	64.6794	97.6378	94.8257
		Value 2	0	0	0	0.554451	25.8032	70.1734	100	100
		Value 3	0	0	1.18879	4.21738	29.465	68.4546	100	100
		Mean	0	0	0.396264	3.83283	27.3166	67.7691	99.2126	98.2752
		SD	0	0	0.560402	2.53442	1.5609	2.29469	1.11355	2.43921
			AraC [ng/ml]
		Cell Viability [%]	1000	250	62.5	15.625	3.90625	0.976562	0.244141	0.0610352
Jurkat	par	Value 1	0	0	0.182284	11.2788	91.9852	100	100	100
		Value 2	0	0	0.175164	13.1561	99.2806	100	100	100
		Value 3	0	0	0.670816	10.1348	90.3306	100	100	100
		Mean	0	0	0.342755	11.5232	93.8654	100	100	100
		SD	0	0	0.231993	1.24549	3.8882	0	0	0
	SAMHD1 WT	Value 1	2.91163	25.3488	77.3302	100	100	100	100	100
		Value 2	0.506199	20.248	59.4014	100	100	100	100	100
		Value 3	0	16.2631	55.8087	100	100	100	100	100
		Mean	1.13928	20.62	64.1801	100	100	100	100	100
		SD	1.27017	3.71854	9.4135	0	0	0	0	0
	SAMHD1 D311A	Value 1	0.467602	0.267201	4.72797	22.6972	95.9697	100	100	100
		Value 2	0	0	2.11079	12.5481	79.481	100	100	96.5714
		Value 3	0	0.435347	1.53517	17.4979	98.3197	100	100	100
		Mean	0.155867	0.234183	2.79131	17.5811	91.2568	100	100	98.8571
		SD	0.22043	0.179257	1.38944	4.14379	8.38182	0	0	1.61624
